# Supplementary material for: Circular RNA hsa_circ_0062682 Binds to YBX1 and Promotes Oncogenesis in Hepatocellular Carcinoma
Source: MDPI journal article supplement (doi:10.3390/cancers14184524), 2022-09-19

Figure 6E – YBX1, Huh-7 OE

Upper membrane, from right to left (input, antisense, sense, anti-eGFP)

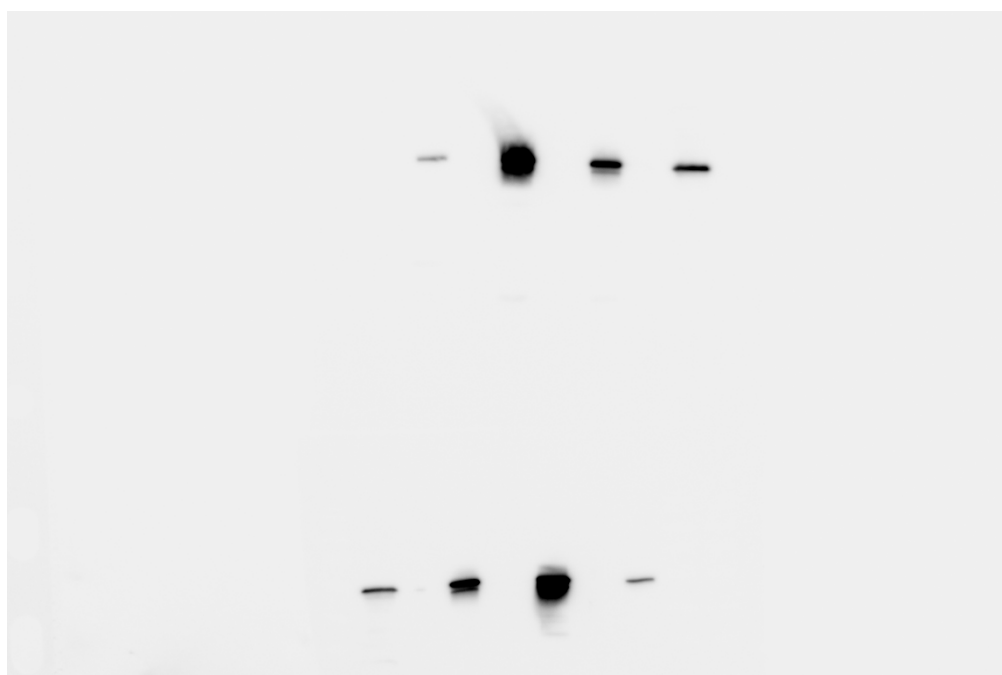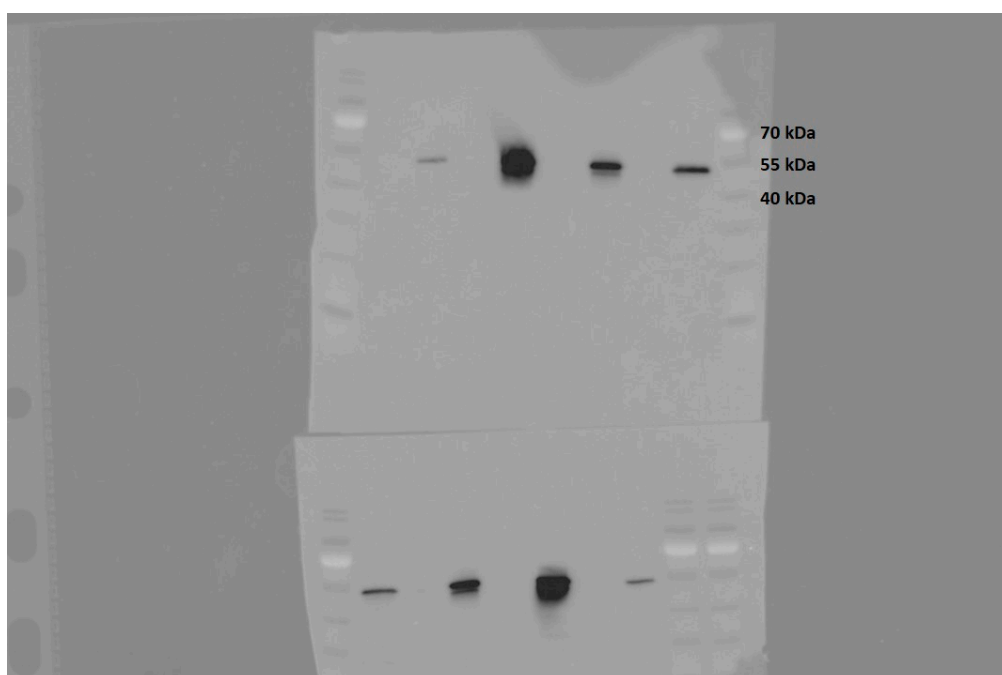

Figure 6E – YBX1, SNU-449 OE

Lower membrane, from left to right (input, antisense, sense, anti-eGFP)

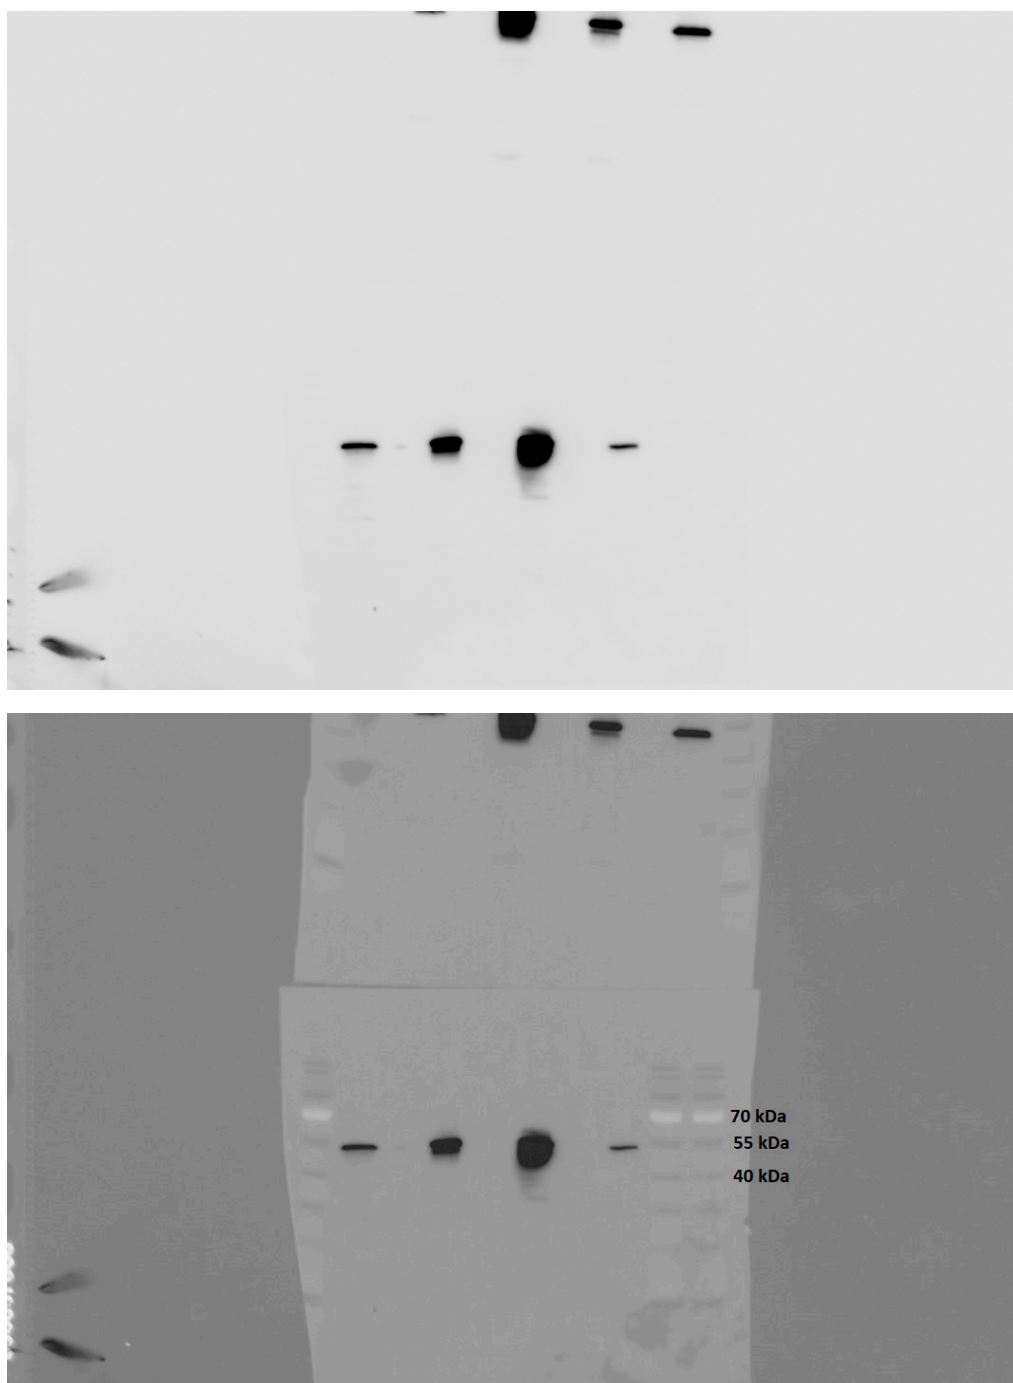

Figure 6E – IGF2BP1, Huh-7 OE

Upper membrane, from right to left (input, antisense, sense, anti-eGFP)

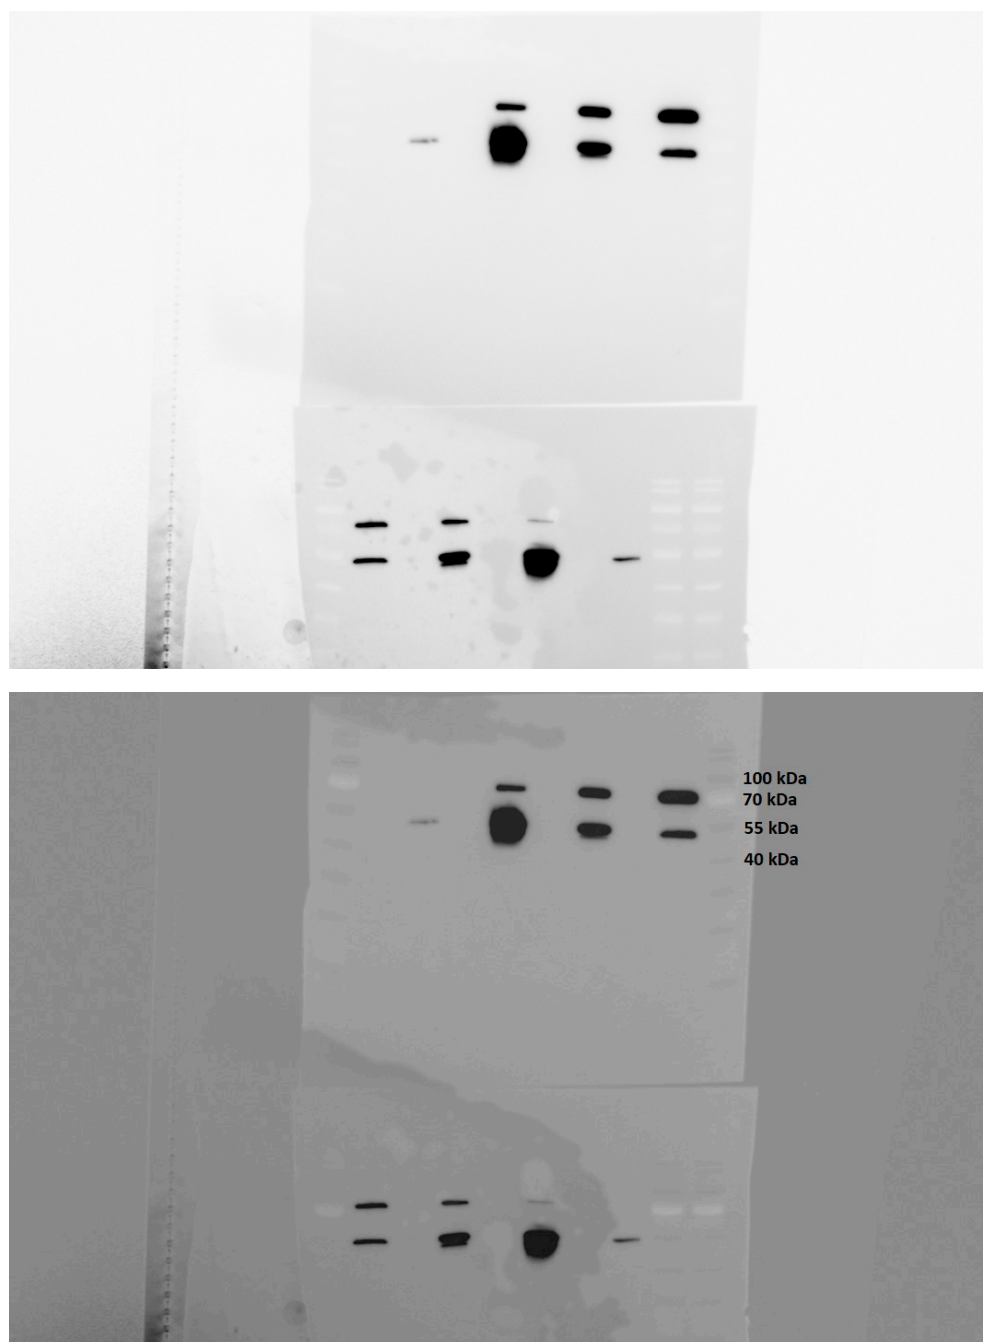

Figure 6E – IGF2BP1, SNU-449 OE

Lower membrane, from left to right (input, antisense, sense, anti-eGFP)

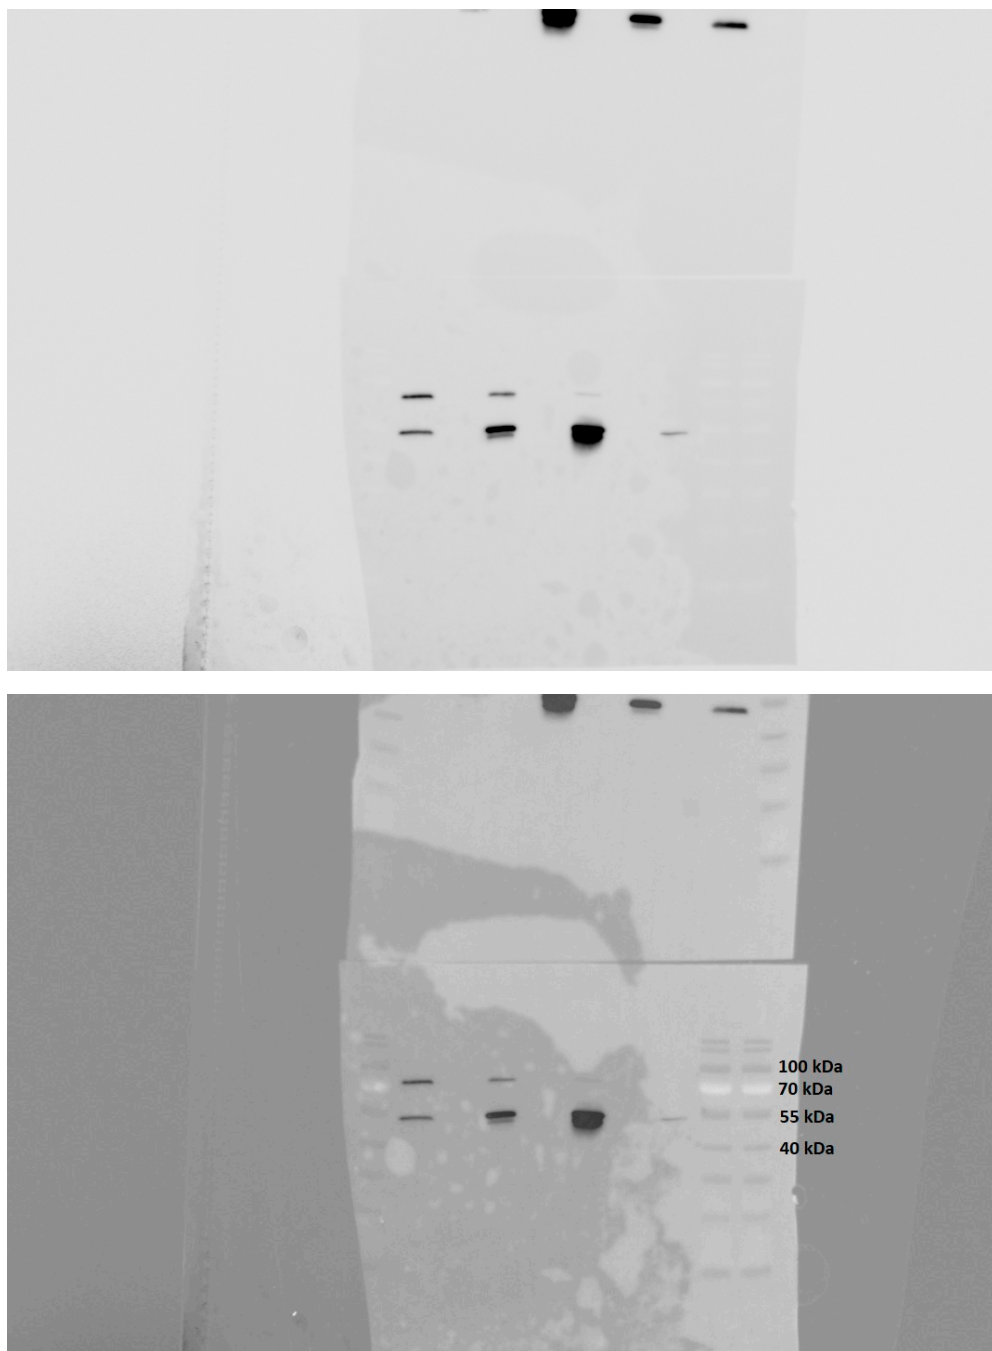

Figure 6E – HNRNPC1/2

Huh-7 OE, upper membrane, from right to left (input, antisense, sense, anti-eGFP)

SNU-449 OE, lower membrane, from left to right (input, antisense, sense, anti-eGFP)

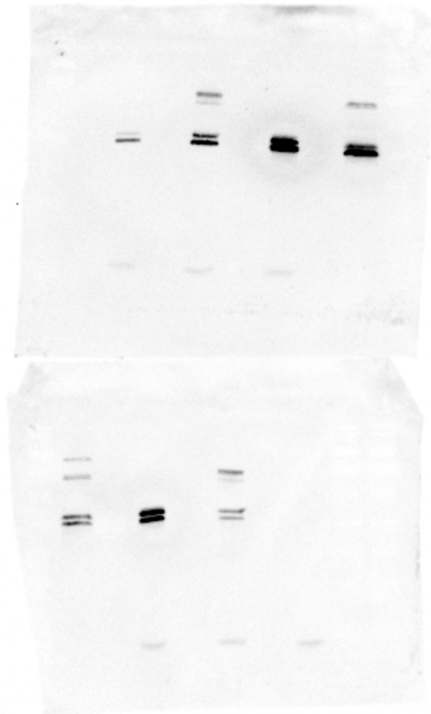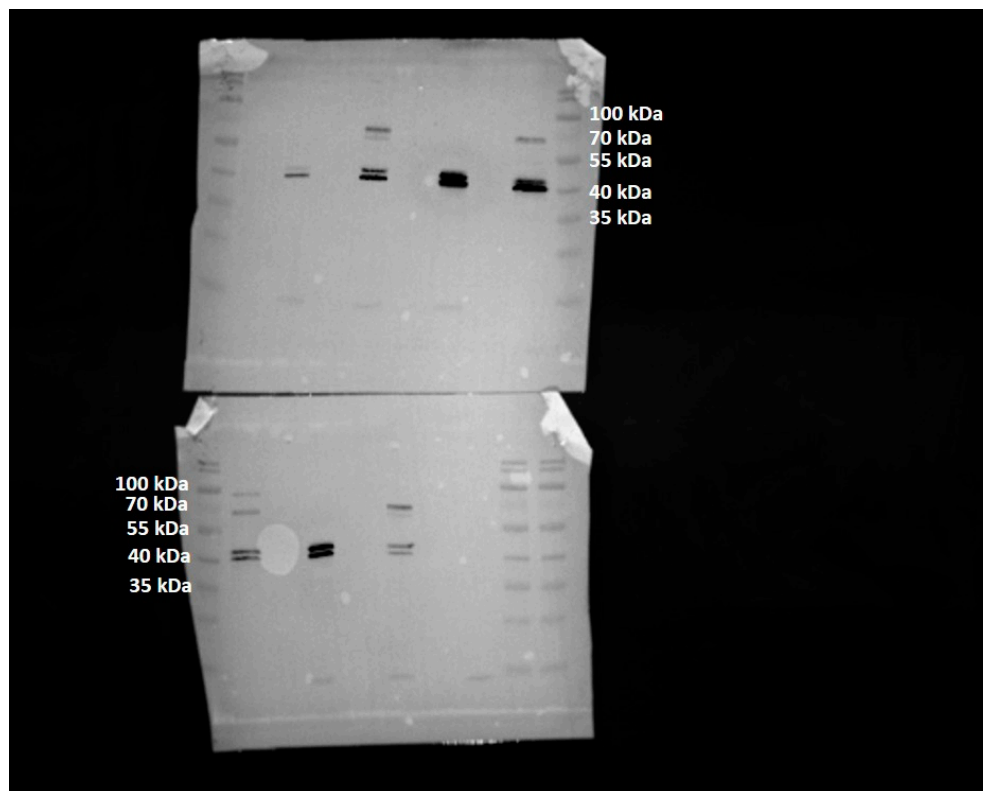

Figure 6E – HNRNPK

Huh-7 OE, upper membrane, from right to left (input, antisense, sense, anti-eGFP)

SNU-449 OE, lower membrane, from left to right (input, antisense, sense, anti-eGFP)

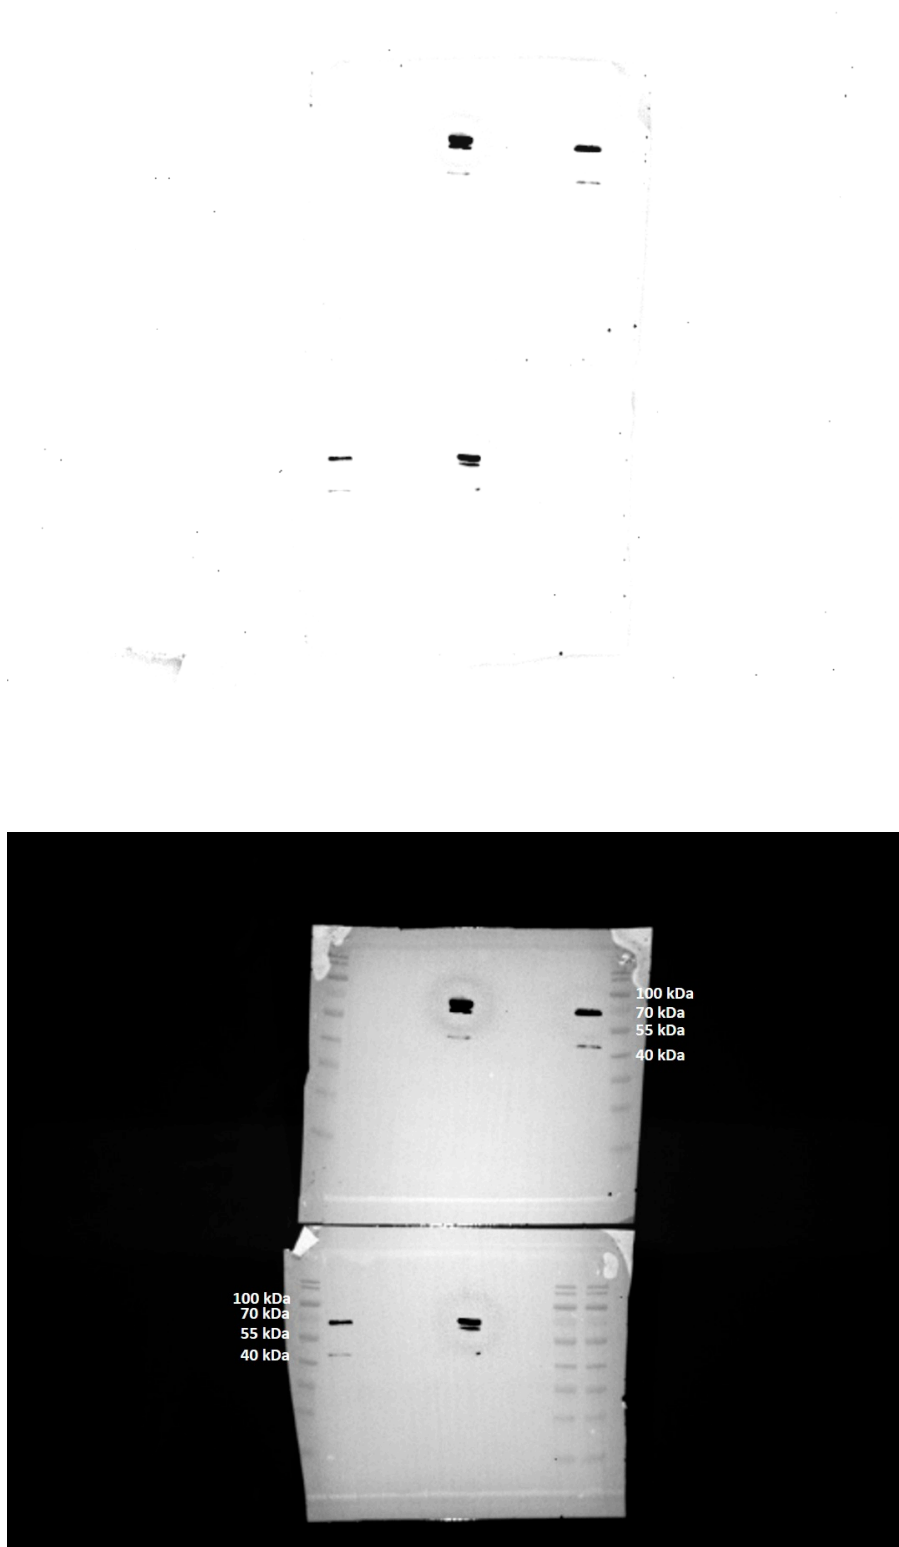

Figure 6E – CSNK2A1

Huh-7 OE, upper membrane, from right to left (input, antisense, sense, anti-eGFP)

SNU-449 OE, lower membrane, from left to right (input, antisense, sense, anti-eGFP)

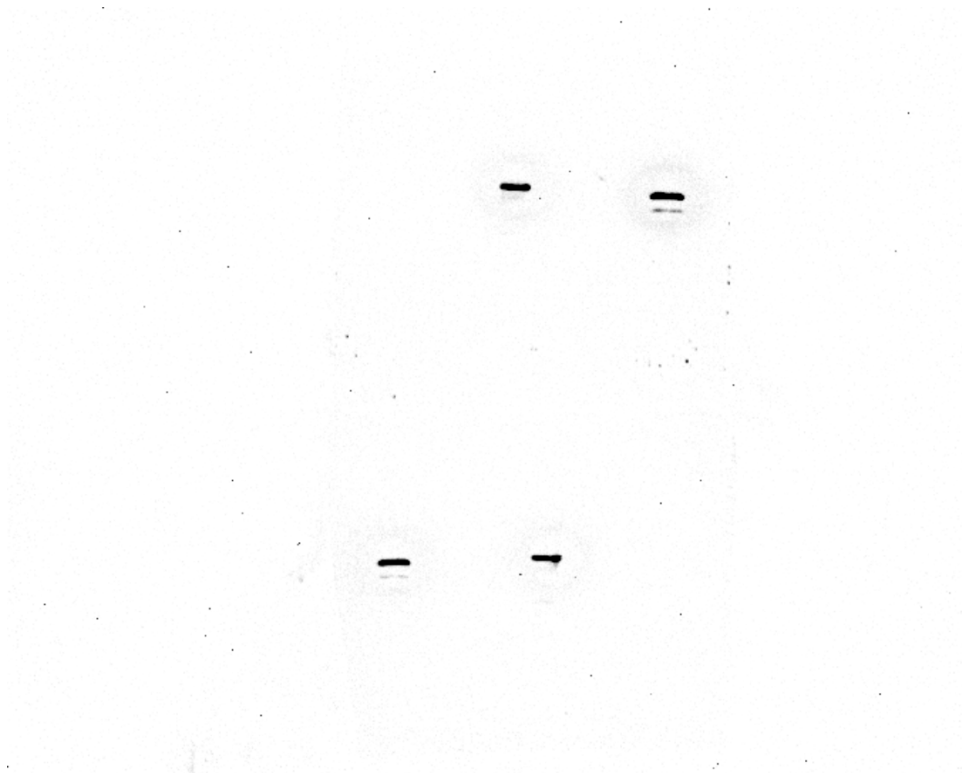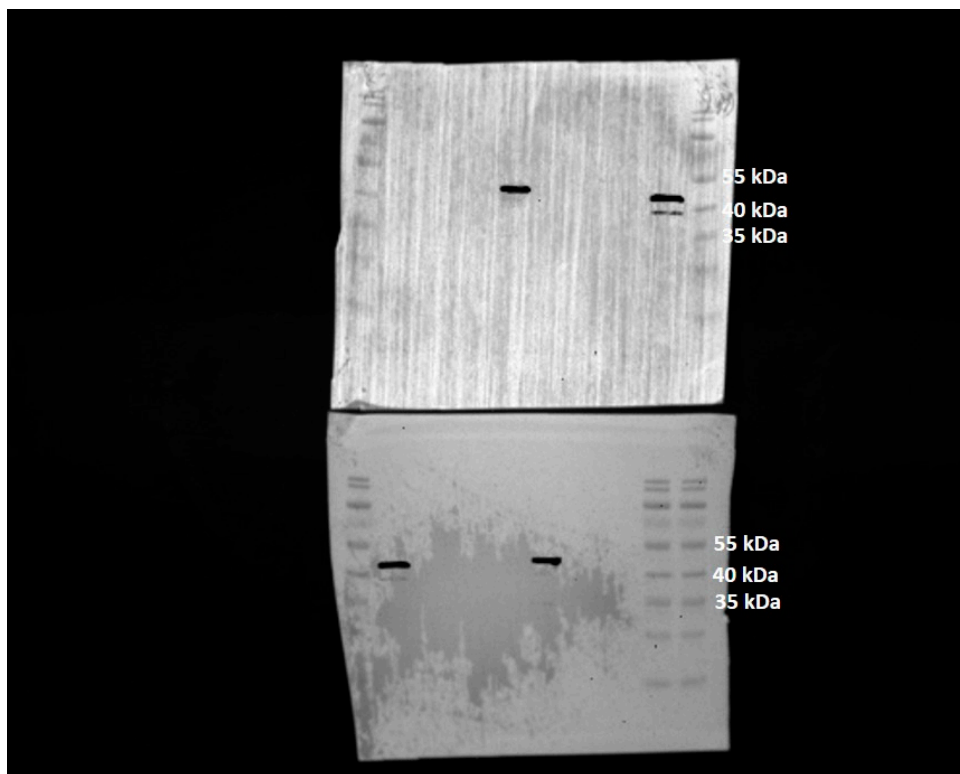

Figure 6E – ENO1

Huh-7 OE, upper membrane, from right to left (input, antisense, sense, anti-eGFP)

SNU-449 OE, lower membrane, from left to right (input, antisense, sense, anti-eGFP)

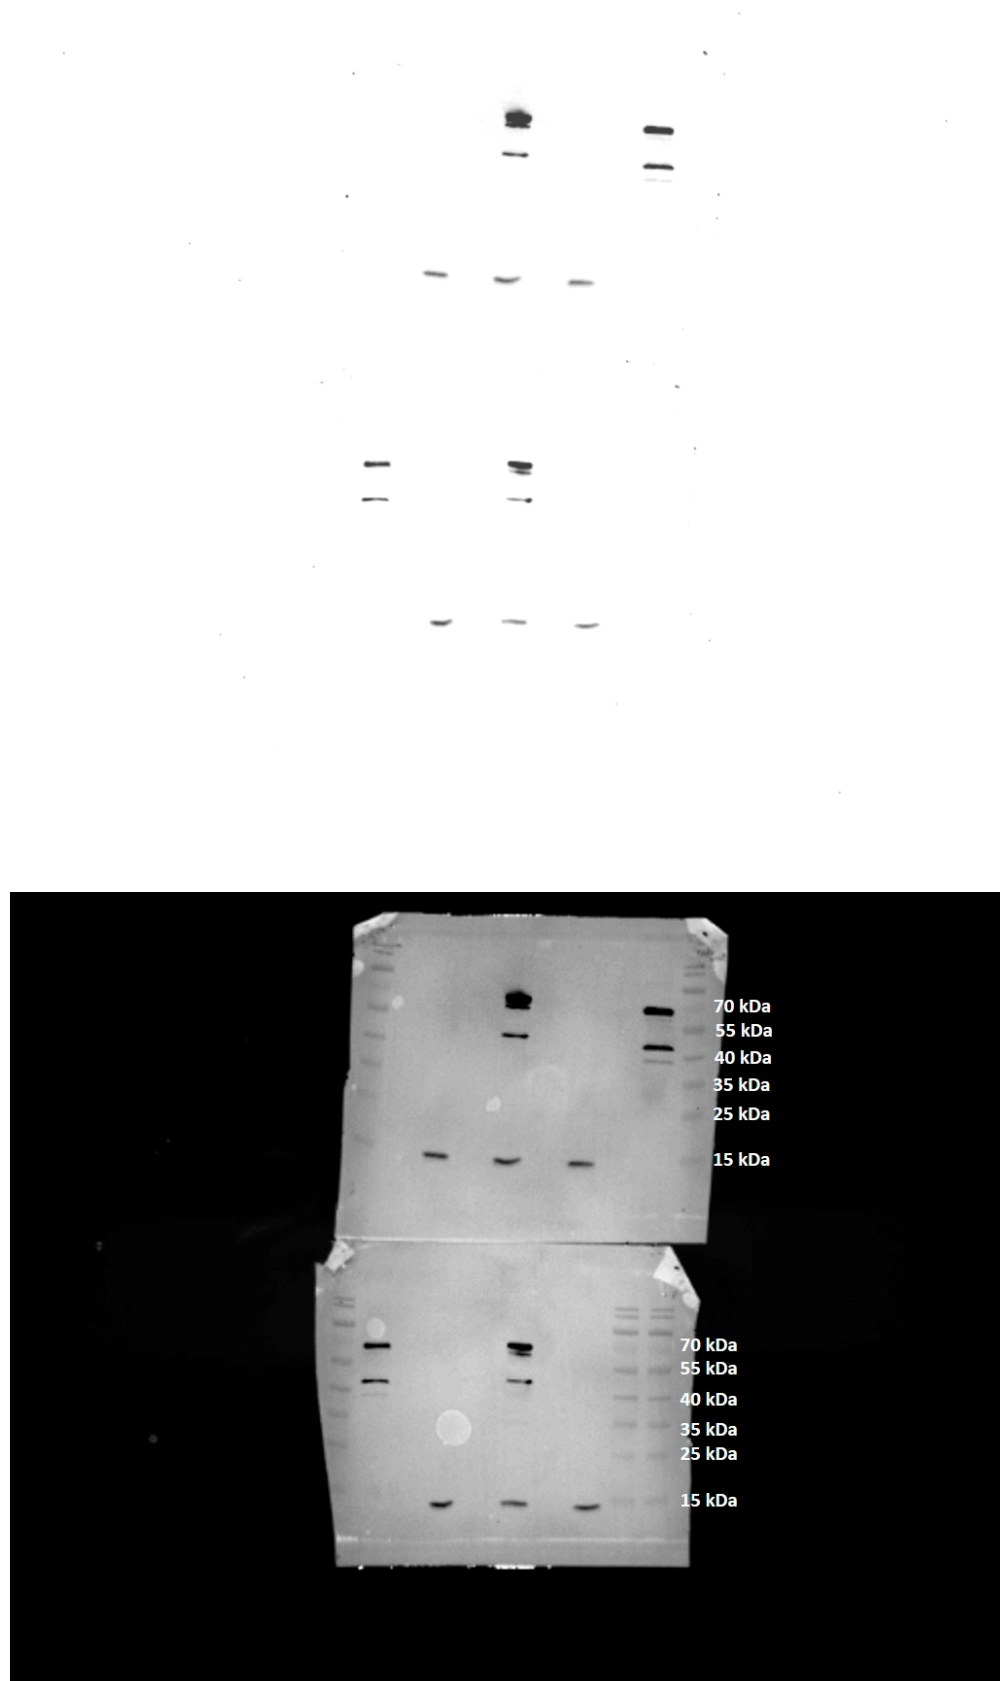



Figure 7A

From left to right (input, anti-YBX1, anti-IgG, anti-YBX1, anti-IgG, anti-YBX1, anti-IgG)

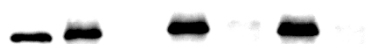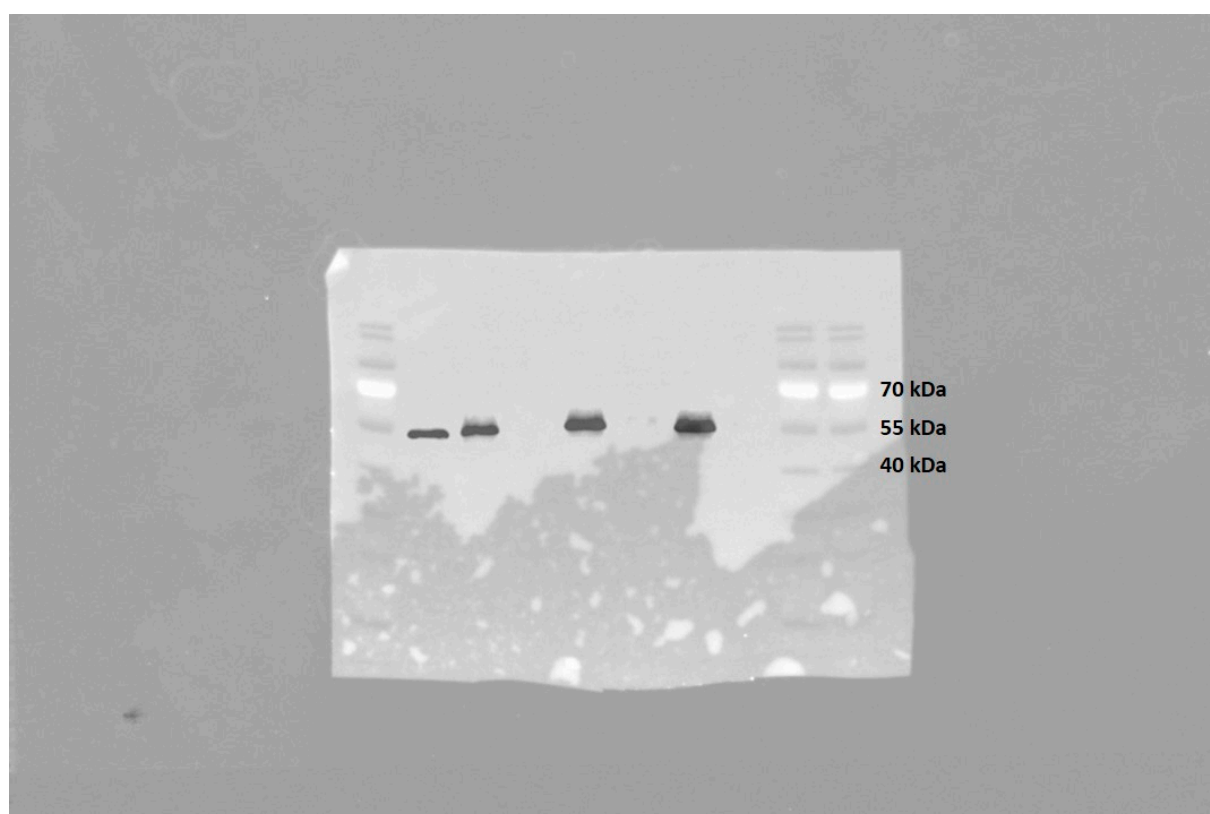

Figure 7E

HNRNPK localization, SNU-449

From left to right

Top – (scramble (cytoplasm, nucleus); KD(cytoplasm, nucleus), scramble (cytoplasm, nucleus), KD (cytoplasm, nucleus))

Bottom left – (control OE (cytoplasm, nucleus); OE (cytoplasm, nucleus); control OE (cytoplasm, nucleus); OE (cytoplasm, nucleus))

Bottom right – (control OE (cytoplasm, nucleus); OE (cytoplasm, nucleus); scramble (cytoplasm, nucleus); KD (cytoplasm, nucleus))

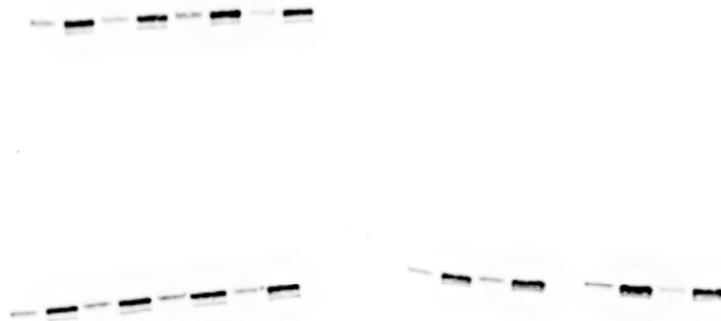

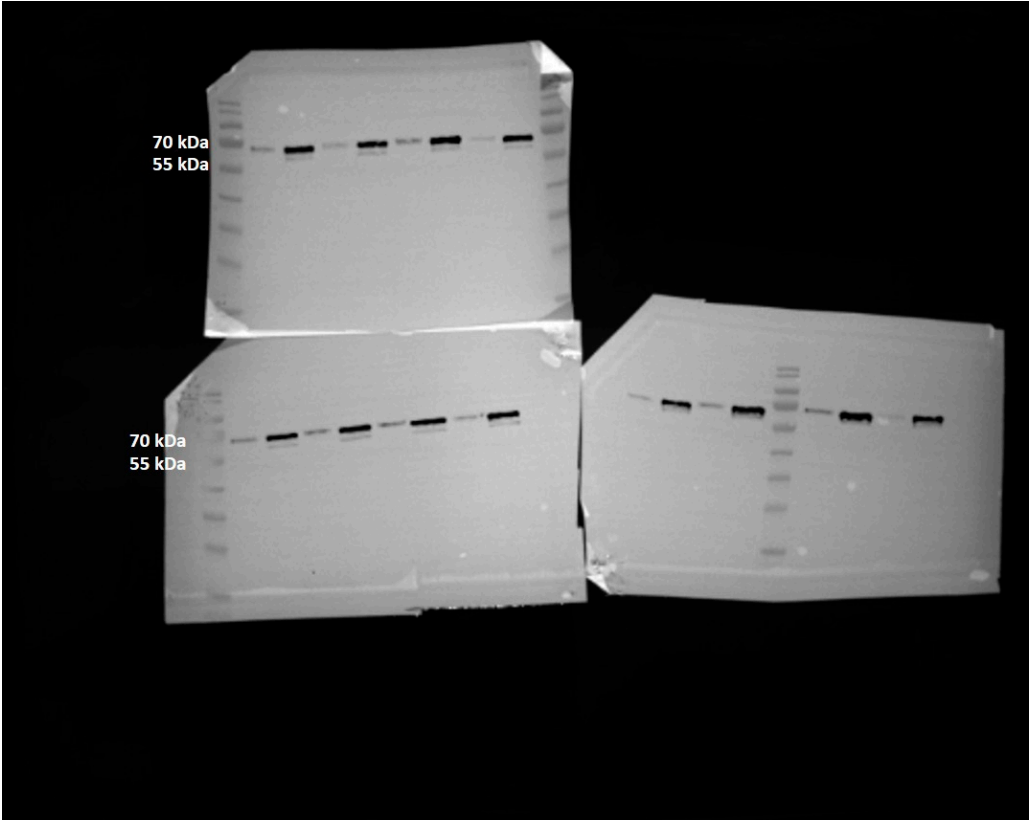

Figure 7E

Lamin A/C localization, SNU-449

From left to right

Top – (scramble (cytoplasm, nucleus); KD(cytoplasm, nucleus), scramble (cytoplasm, nucleus), KD (cytoplasm, nucleus))

Bottom left – (control OE (cytoplasm, nucleus); OE (cytoplasm, nucleus); control OE (cytoplasm, nucleus); OE (cytoplasm, nucleus))

Bottom right – (control OE (cytoplasm, nucleus); OE (cytoplasm, nucleus); scramble (cytoplasm, nucleus); KD (cytoplasm, nucleus))

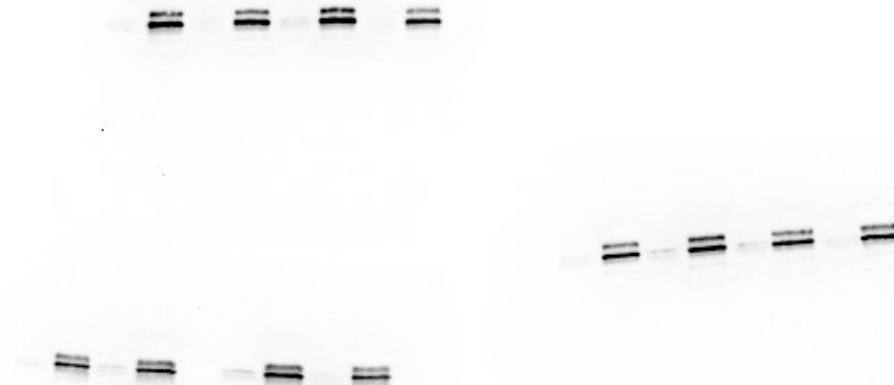

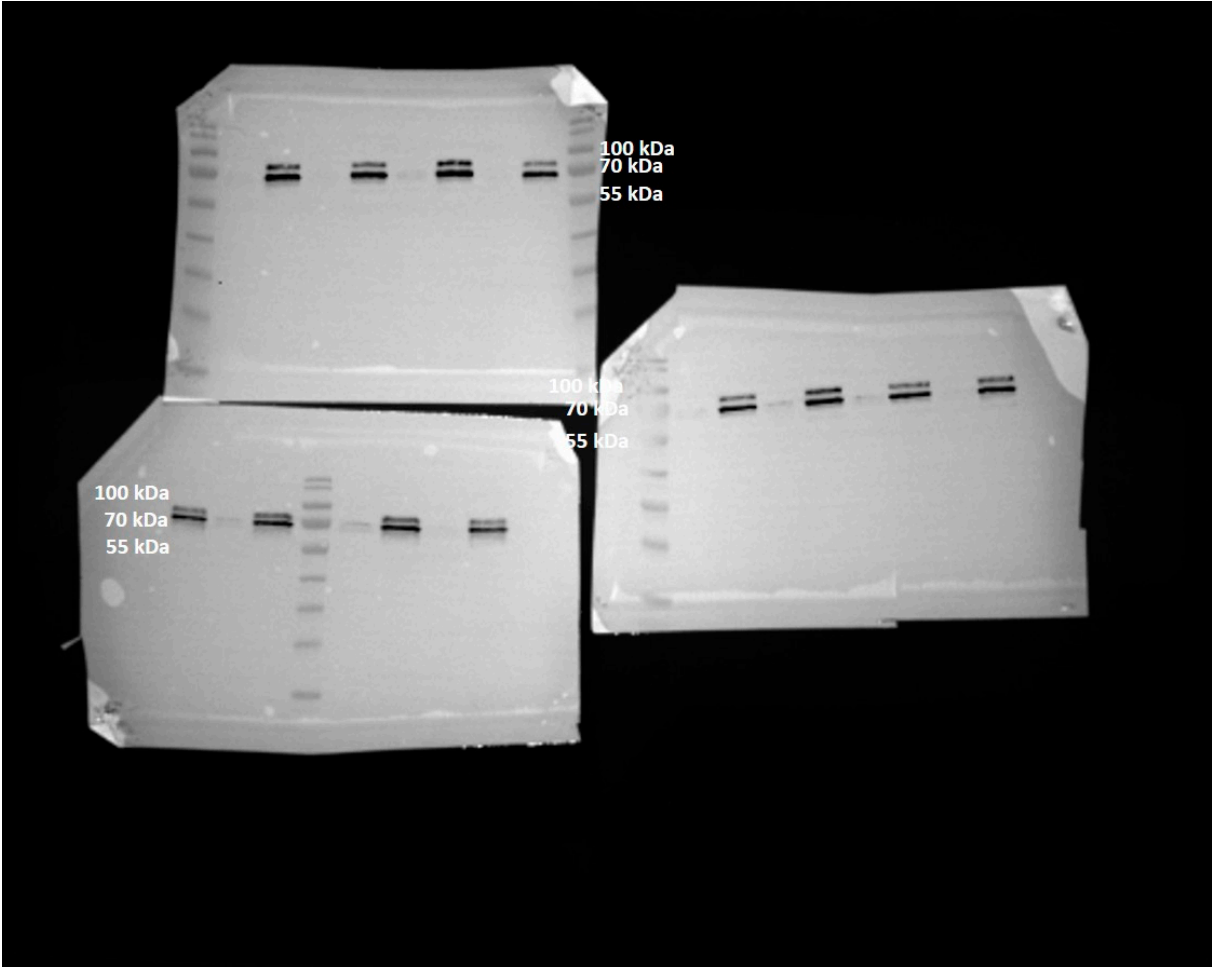

Figure 7E

HNRNPK localization, Huh-7

From left to right

Top – (KD (nucleus, cytoplasm); scramble (nucleus, cytoplasm); KD (nucleus, cytoplasm); scramble (nucleus, cytoplasm))

Bottom left – (control OE (cytoplasm, nucleus); OE (cytoplasm, nucleus); control OE (cytoplasm, nucleus); OE (cytoplasm, nucleus))

Bottom right – (control OE (cytoplasm, nucleus); OE (cytoplasm, nucleus); scramble (cytoplasm, nucleus); KD (cytoplasm, nucleus))

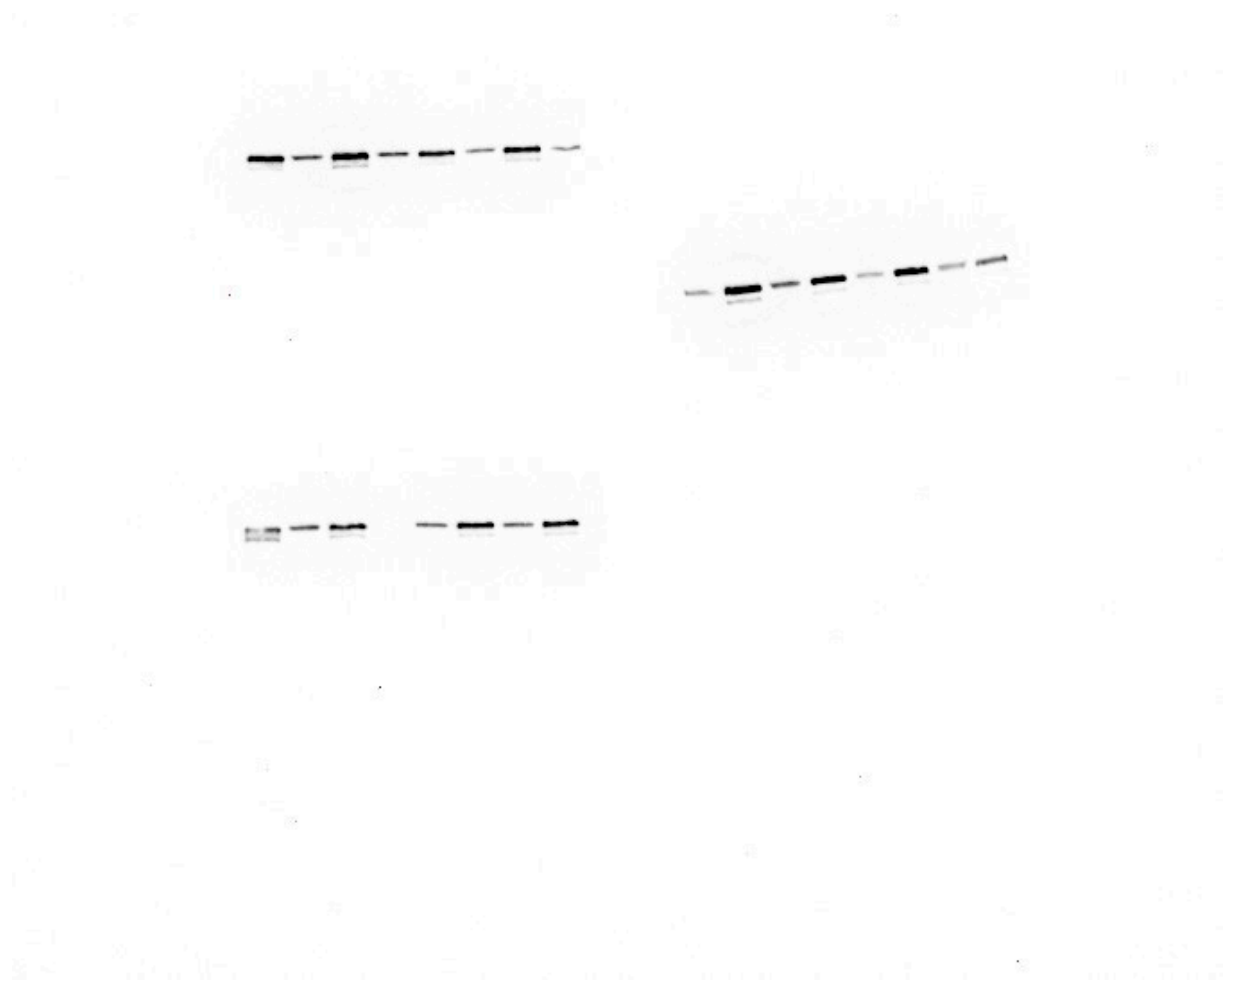

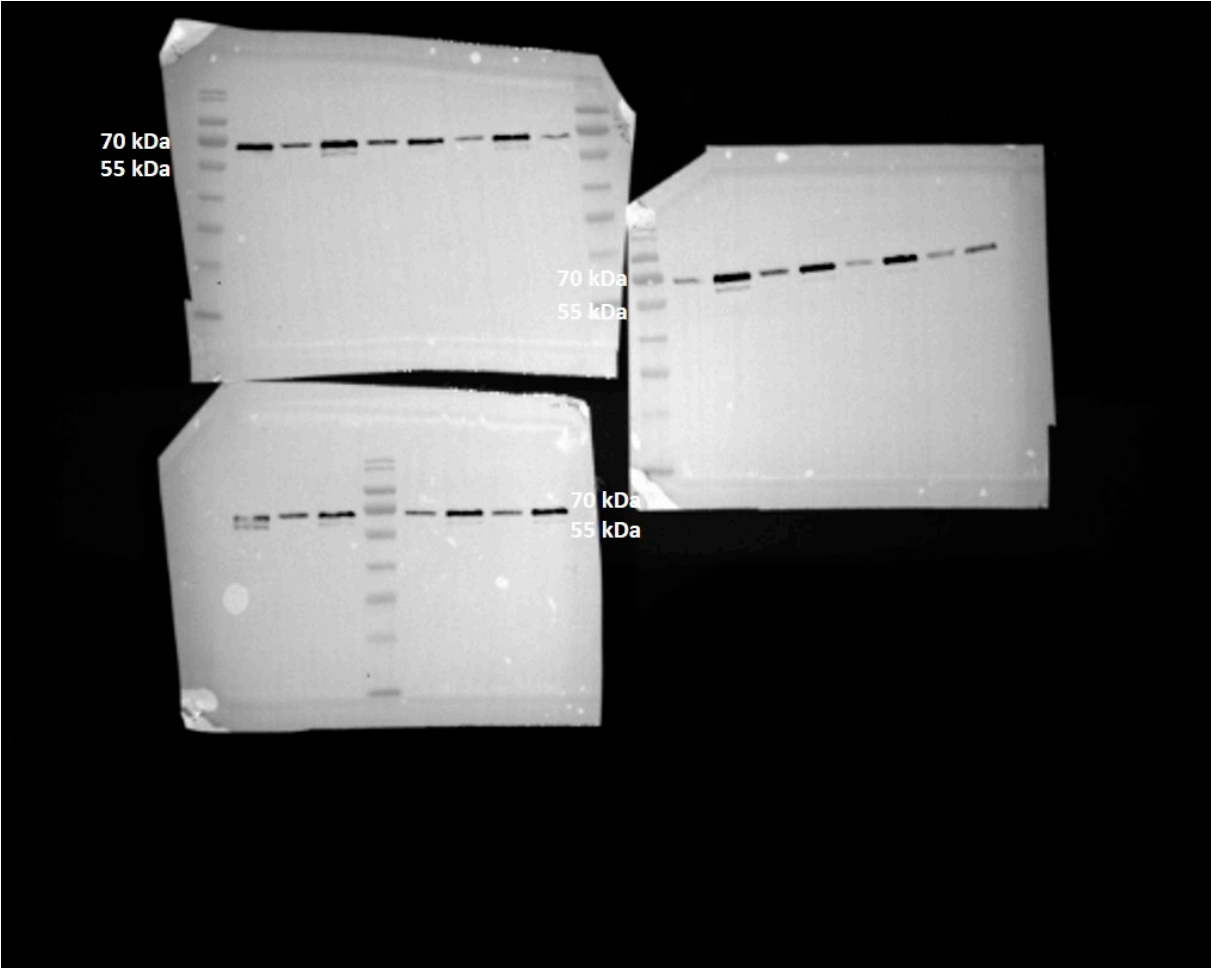

Figure 7E

Lamin A/C localization, Huh-7

From left to right

Top – (KD (nucleus, cytoplasm); scramble (nucleus, cytoplasm); KD (nucleus, cytoplasm); scramble (nucleus, cytoplasm))

Bottom left – (control OE (cytoplasm, nucleus); OE (cytoplasm, nucleus); control OE (cytoplasm, nucleus); OE (cytoplasm, nucleus))

Bottom right – (control OE (cytoplasm, nucleus); OE (cytoplasm, nucleus); scramble (cytoplasm, nucleus); KD (cytoplasm, nucleus))

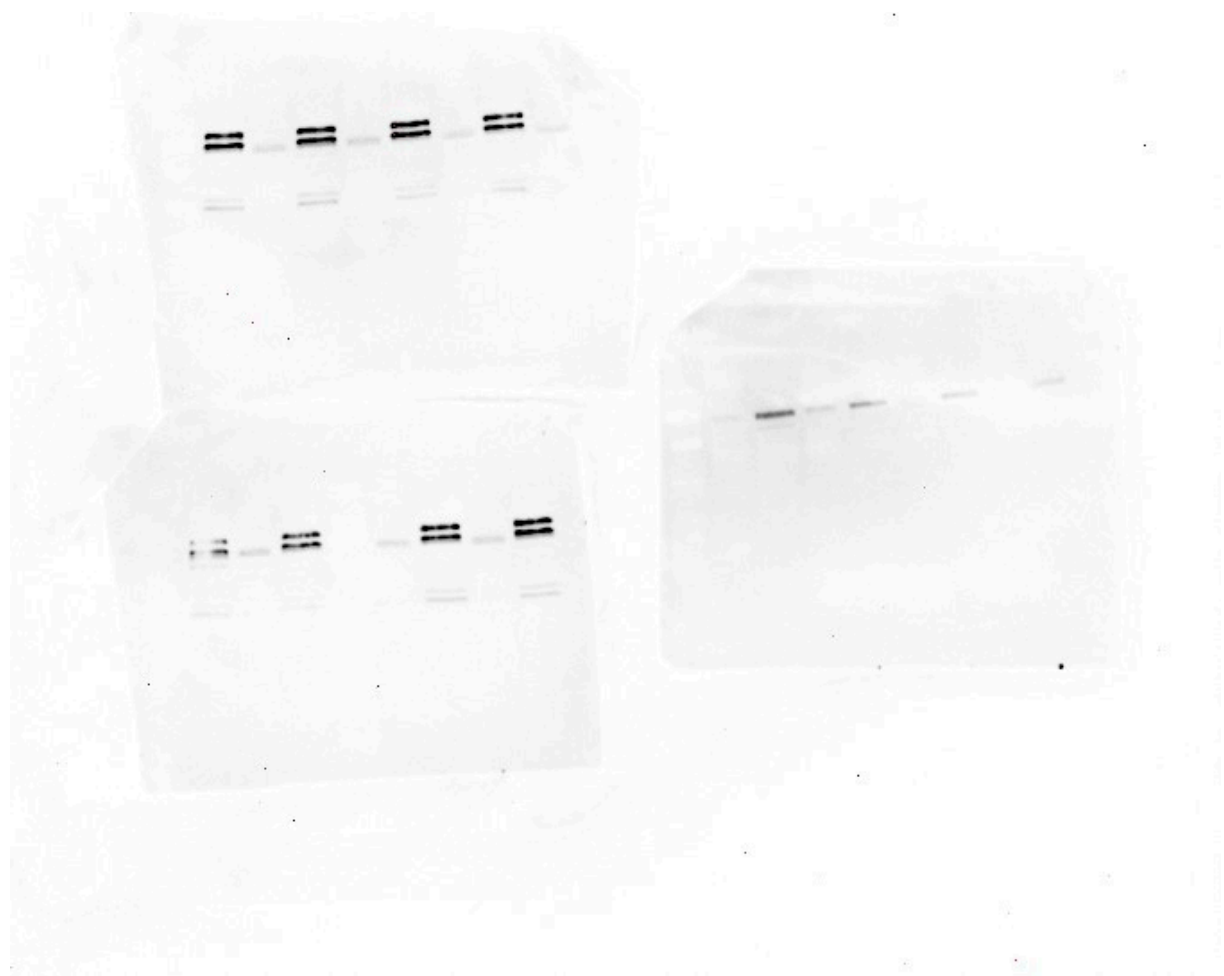



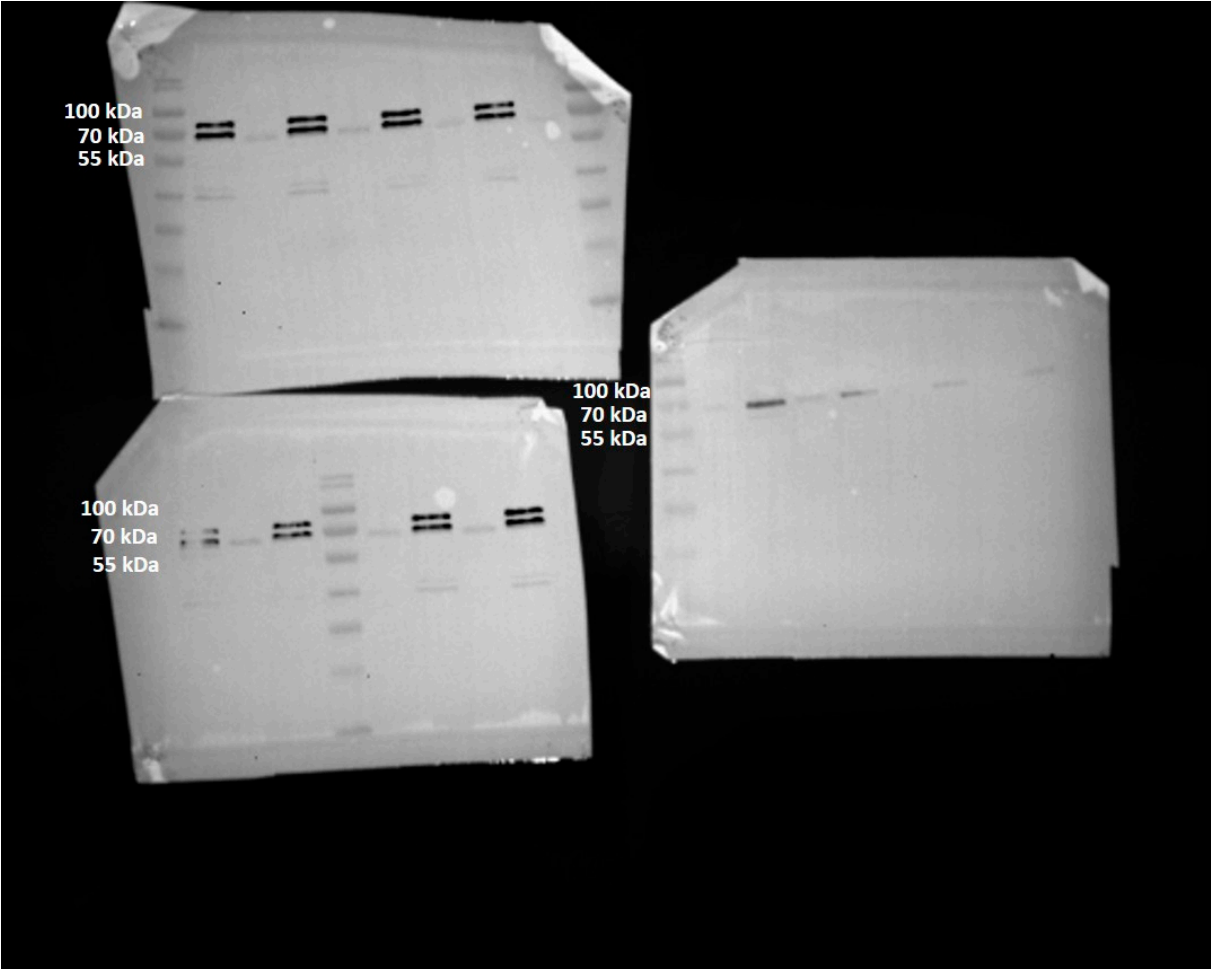

Supplement: s1 [file s1]
