# Supplementary material for: Circular RNA hsa_circ_0062682 Binds to YBX1 and Promotes Oncogenesis in Hepatocellular Carcinoma
Source: MDPI journal article supplement (doi:10.3390/cancers14184524), 2022-09-19
Supplement: s1 [file s1]

## Supplementary Materials

### Circular RNA hsa\_circ\_0062682 binds to YBX1 and promotes oncogenesis in hepatocellular carcinoma

Rok Razpotnik<sup>1</sup>, Robert Vidmar<sup>2</sup>, Marko Fonovič<sup>2</sup>, Damjana Rozman<sup>1</sup> and Tadeja Režen<sup>1,\*</sup>

<sup>1</sup> Centre for Functional Genomics and Bio-Chips, Institute of Biochemistry and Molecular Genetics, Faculty of Medicine, University of Ljubljana, 1000 Ljubljana, Slovenia

<sup>2</sup> Department of Biochemistry and Molecular and Structural Biology, Jožef Stefan Institute, 1000 Ljubljana, Slovenia

\* Correspondence: tadeja.rezen@mf.uni-lj.si; Tel.: +386-1543-7592

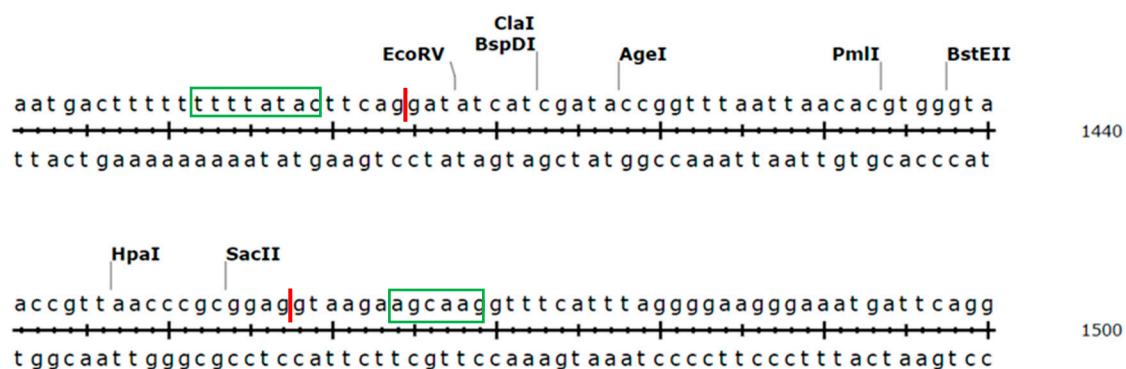

**Figure S1:** Schematic representation of the modification of a multiple cloning site in the mini-gene plasmid system pRR. Green colour indicates sites of introduced mutations. Red colour indicates splice sites.

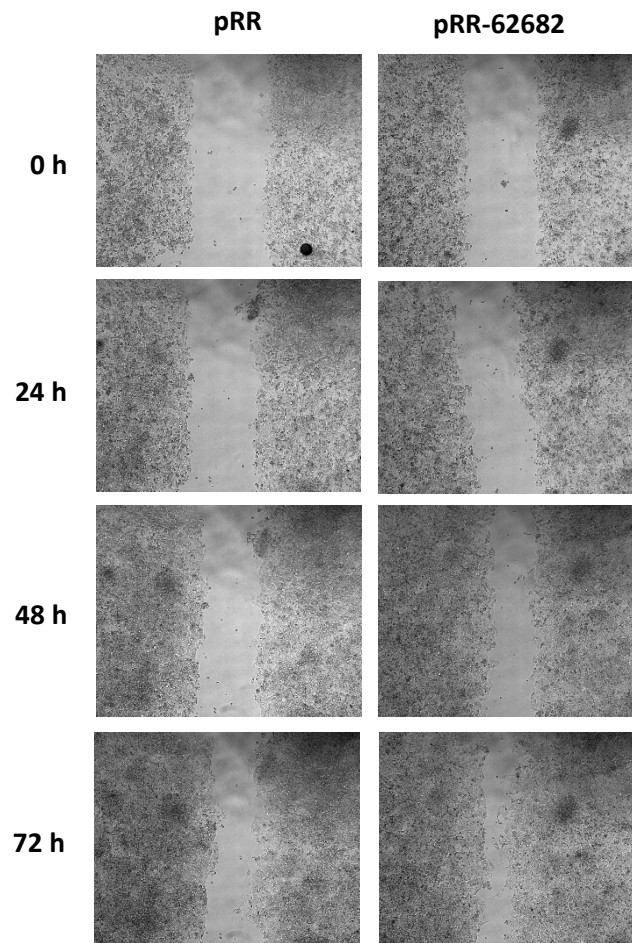

**Figure S2:** Representative images of the wound healing assay of hsa\_circ\_0062682-overexpressing HepG2 cell line; pRR – empty plasmid, pRR-62682 – plasmid for hsa\_circ\_0062682 overexpression.

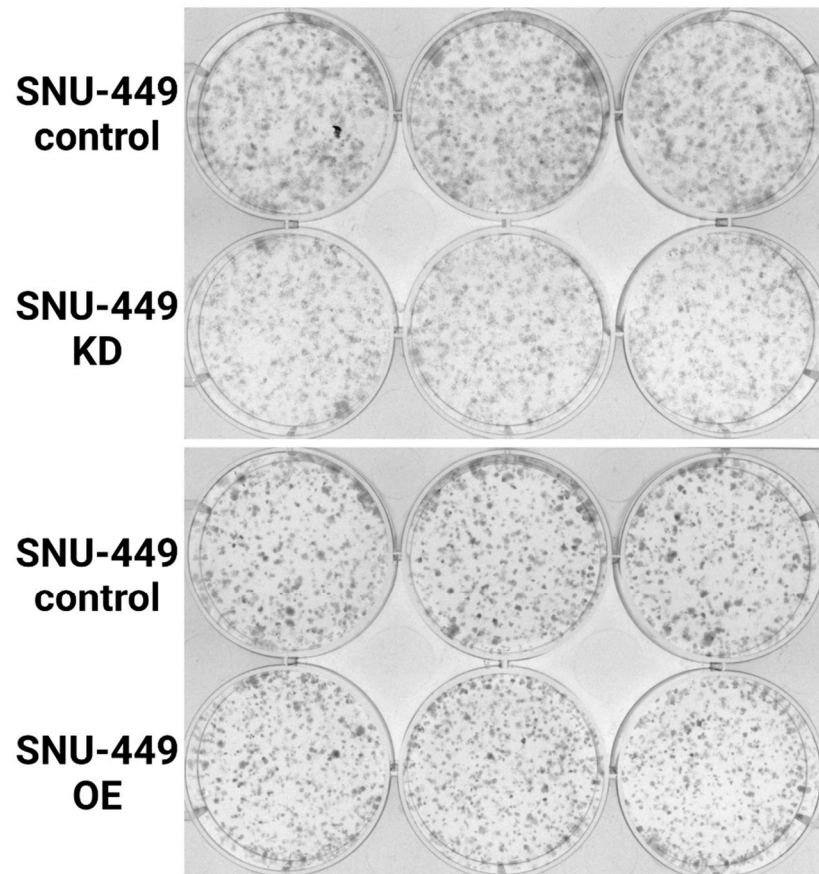

**Figure S3:** Colony forming assay in transduced SNU-449 cell lines; KD – knockdown (2.000 cells) ; OE – overexpression (1.000 cells).

**A**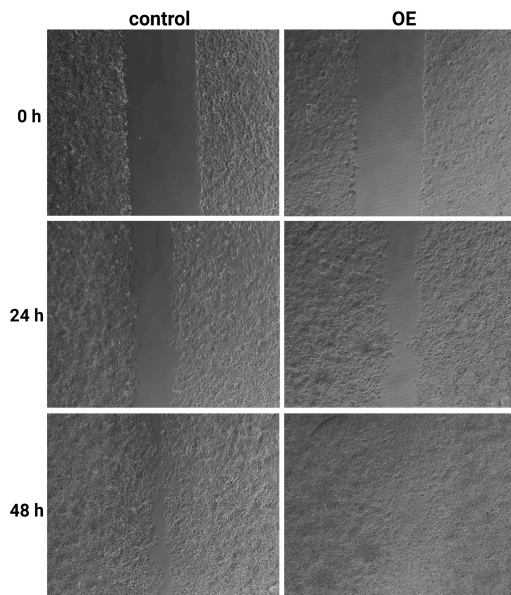**B**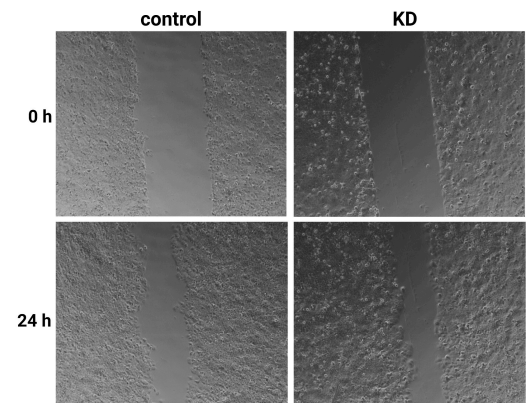

**Figure S4:** Representative images of a wound healing assay of overexpressing Huh-7 (A) and in a knockdown of Huh-7 (B); OE – overexpression, KD – knockdown.

A

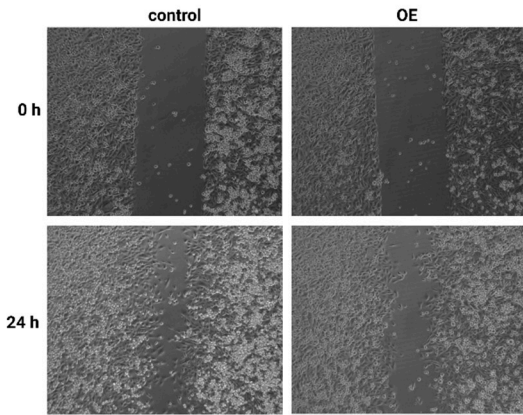

B

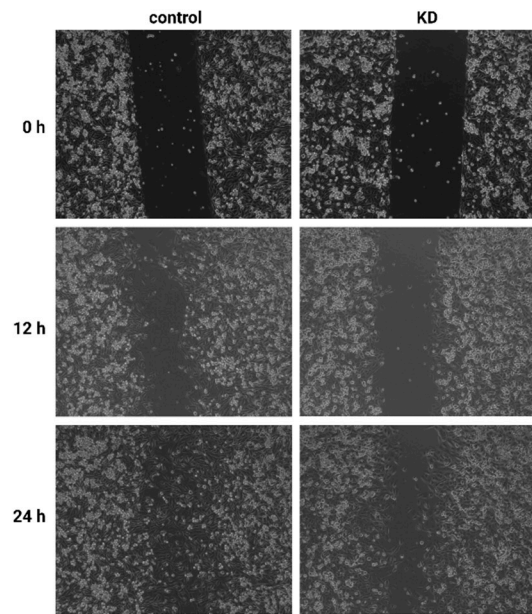

**Figure S5:** Representative images of a wound healing assay of overexpressing SNU-449 (A) and in a knockdown of SNU-449 (B); OE – overexpression, KD – knockdown.

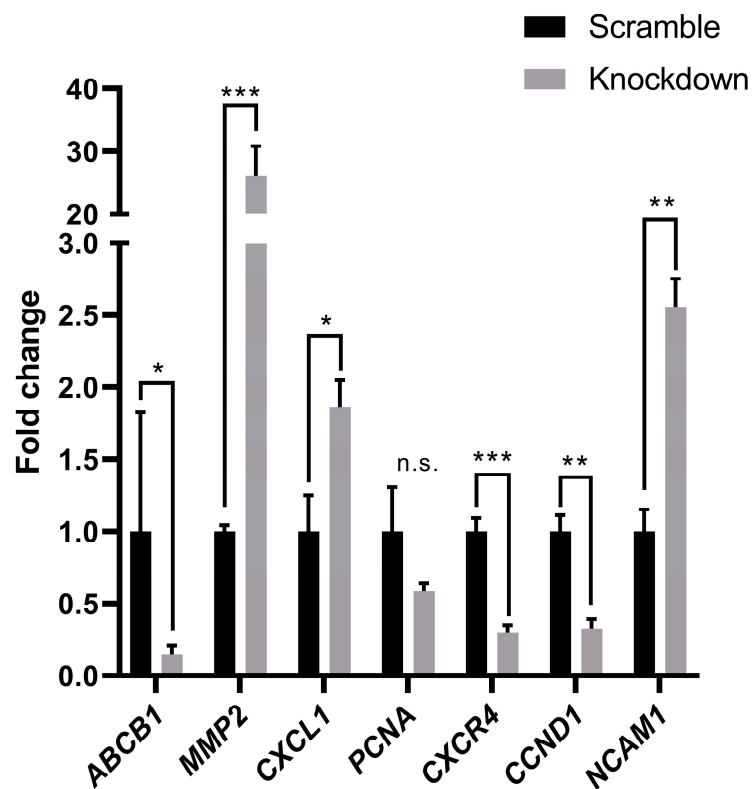

**Figure S6:** RT-qPCR validation of differentially expressed genes identified by microarray analysis in the knockdown cell line SNU-449. We analyzed the expression of target candidates of transcription factors E2F1

(*CCND1*, *PCNA*), *NFKB1* (*MMP2*, *CXCL1*, *NCAM1*) and *HIF-1A* (*ABCB1*, *CXCR4*). Results are represented as averages and error bars represent standard deviation. \* p-value  $\leq 0.05$ ; \*\* p-value  $\leq 0.01$ ; \*\*\* p-value  $\leq 0.001$ ; n.s. – not significant, Student's t-test.

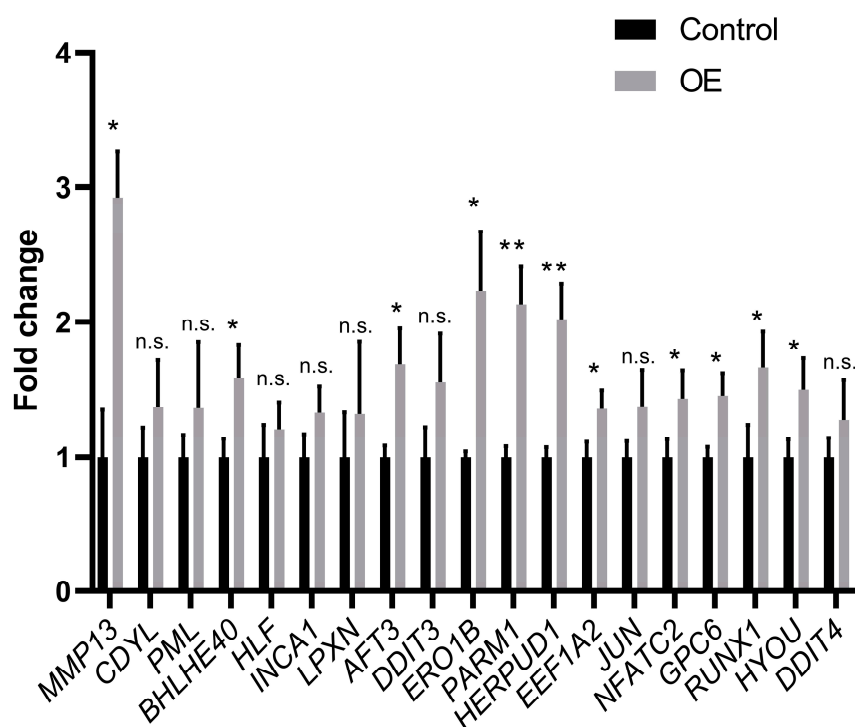

**Figure S7:** RT-qPCR validation of differentially expressed genes identified by microarray analysis in the transient overexpression of *hsa\_circ\_0062682* in Huh-7 cell line. Results are represented as averages and error bars represent standard deviation. \* p-value  $\leq 0.05$ ; \*\* p-value  $\leq 0.01$ ; n.s. – not significant, Student's t-test.

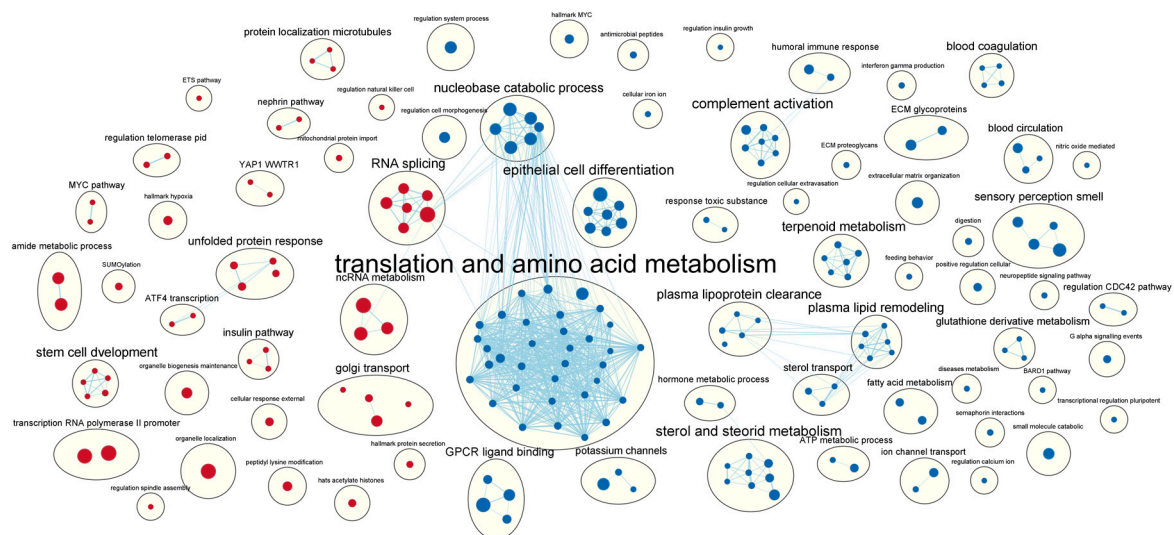

**Figure S8:** GSEA analysis of upregulated (red colour) and downregulated (blue colour) pathways of Huh-7 transient overexpression

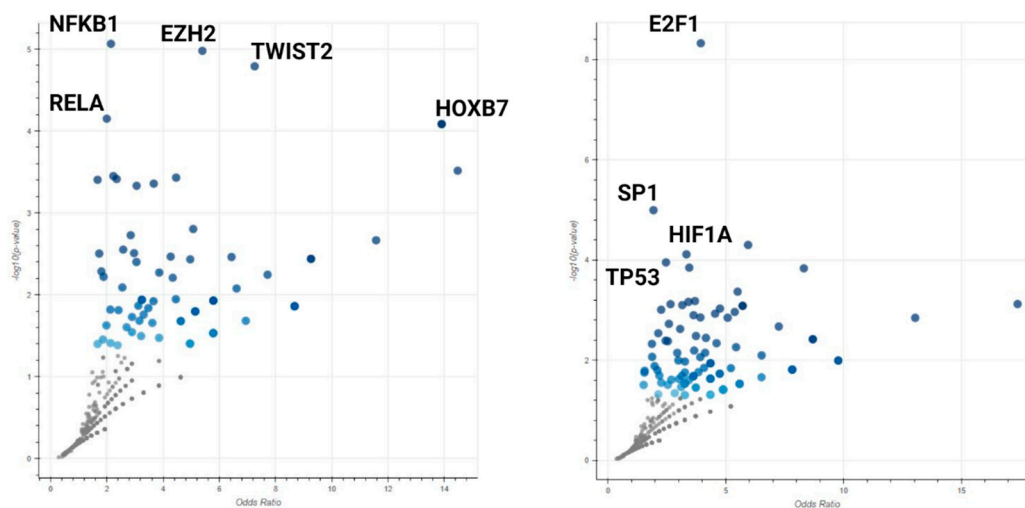

**Figure S9:** Volcano plots from Enrichr analysis of enriched gene sets in TRRUST transcription factors of upregulated (left) and downregulated (right) differentially expressed genes in SNU-449 knockdown cell line.

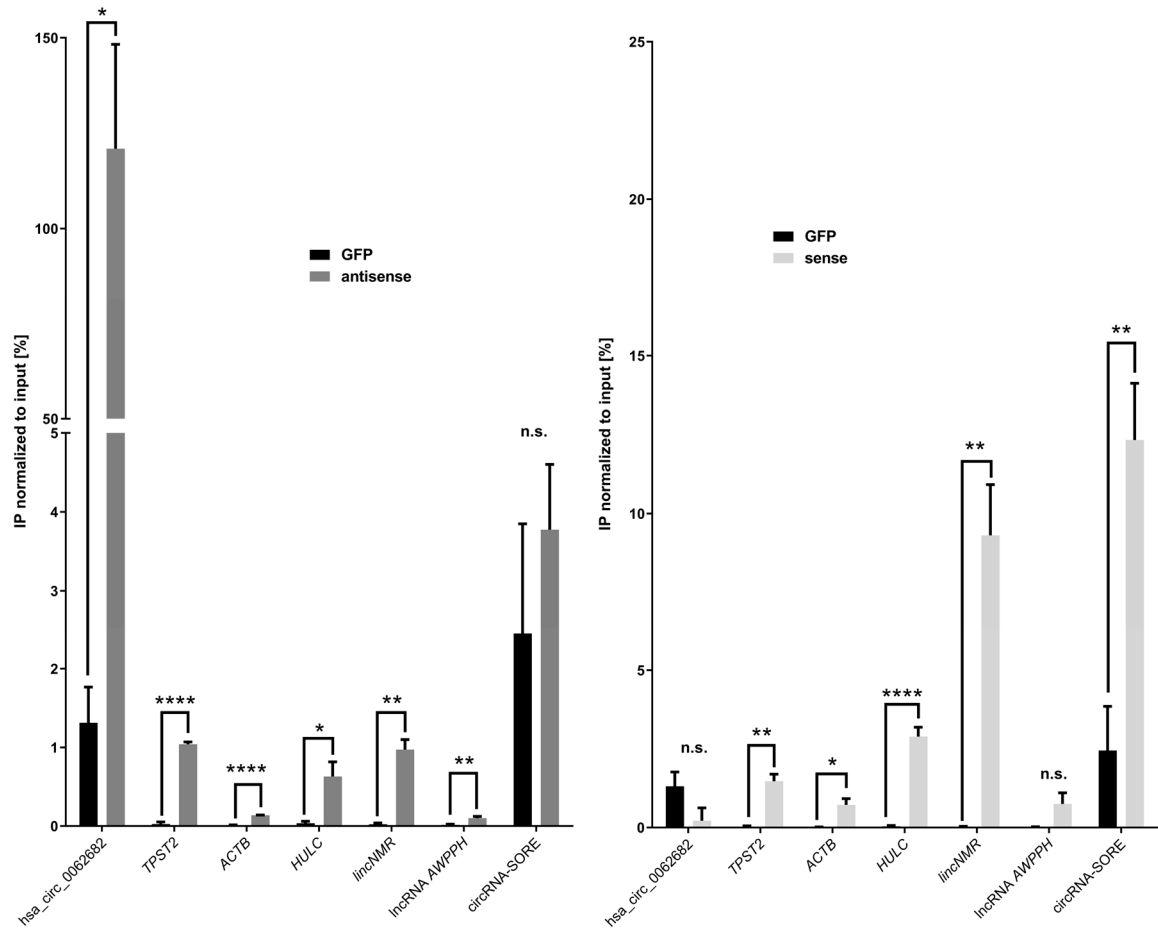

**Figure S10:** Enrichment of RNA species in biotinylated oligonucleotide pulldowns normalized the input; antisense (left), sense (right) (n = 3). Results are represented as averages and error bars represent standard deviation. \* p-value  $\leq 0.05$ ; \*\* p-value  $\leq 0.01$ ; \*\*\* p-value  $\leq 0.001$ ; \*\*\*\* p-value  $\leq 0.0001$ ; n.s. – not significant, Student's t-test.



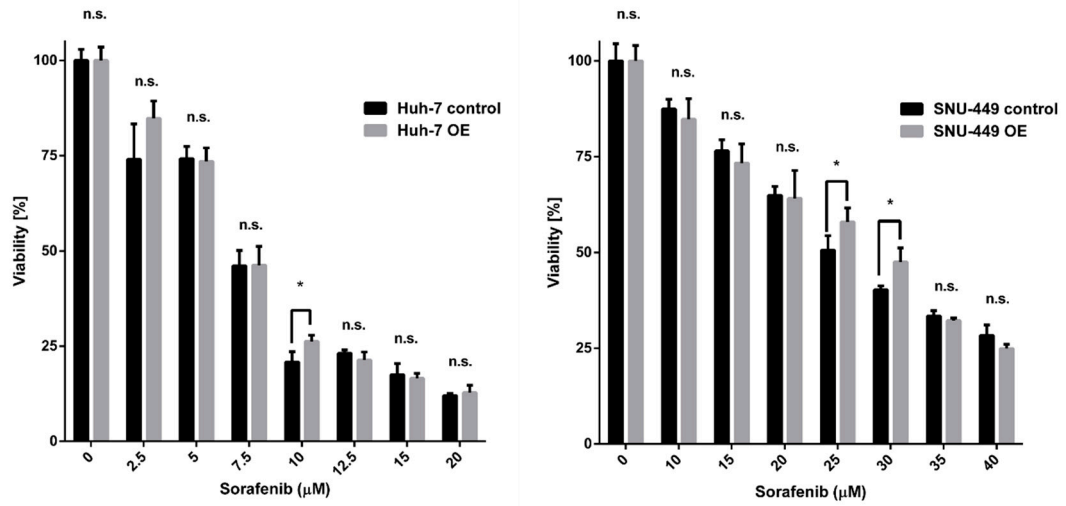

**Figure S11:** Viability of sorafenib treated OE cell lines measured by colorimetric CCK-8 assay (n = 4). Results are represented as averages and error bars represent standard deviation. \* p-value  $\leq 0.05$ ; n.s. – not significant, Student's t-test.

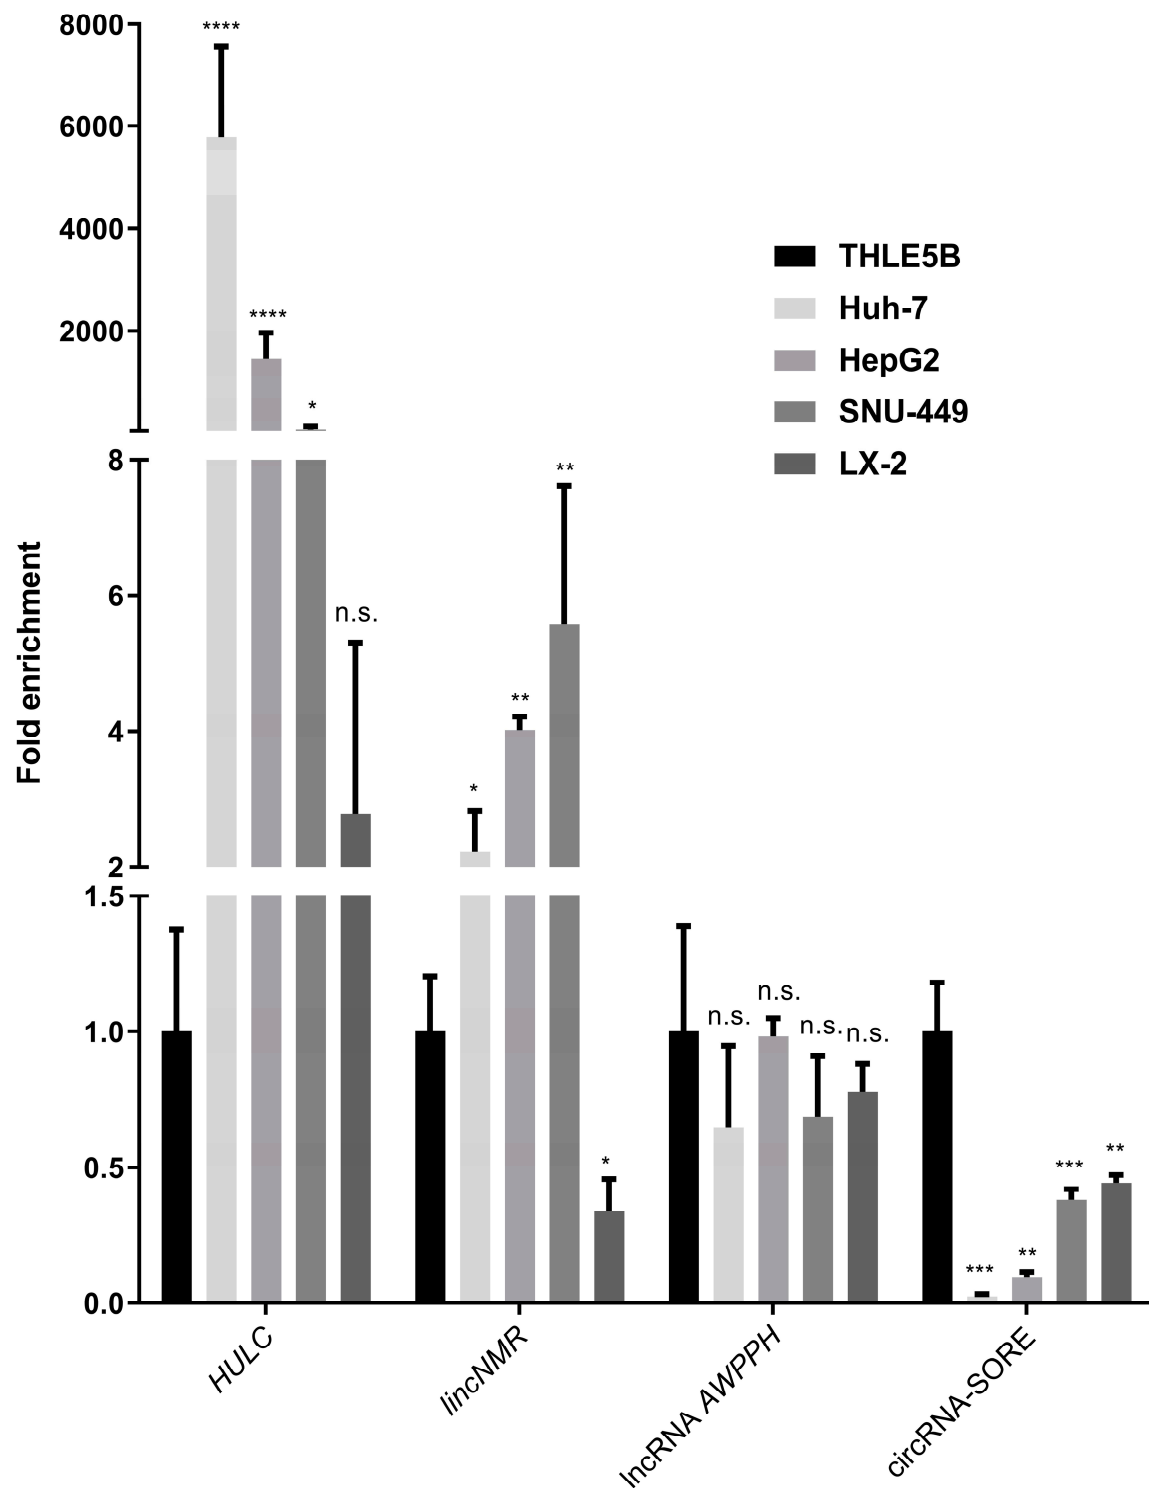

**Figure S12:** Relative expression of RNA species in human HCC model cell lines (Huh-7, HepG2, SNU-449) and human hepatic stellate cell line LX-2, normalized to the immortalized human hepatocyte cell line THLE5B (n = 3). Results are represented as averages and error bars represent standard deviation. \* p-value  $\leq 0.05$ ; \*\* p-value  $\leq 0.01$ ; \*\*\* p-value  $\leq 0.001$ ; \*\*\*\* p-value  $\leq 0.0001$ ; n.s. – not significant, Student's t-test.

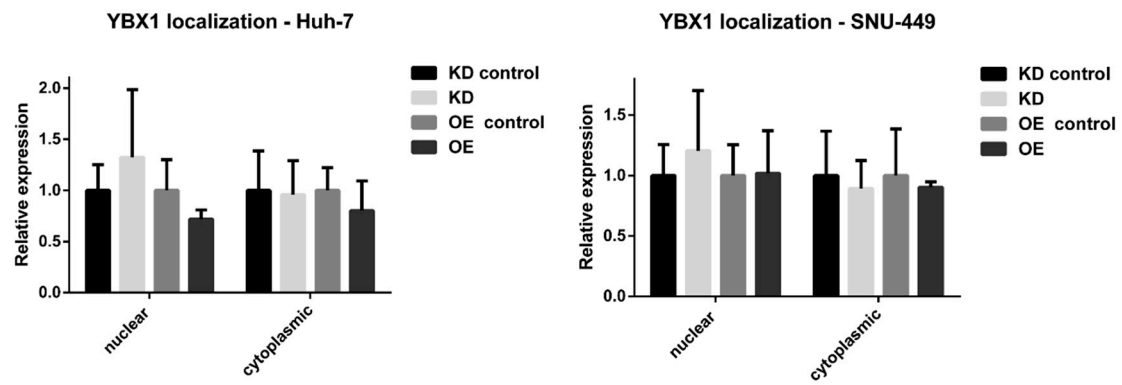

**Figure S13:** YBX1 localization in hsa\_circ\_0062682 stable cell lines identified by western blotting (n = 3); OE – overexpression, KD – knockdown, cyto – cytoplasmic fraction, nuc – nuclear fraction. Results are represented as averages and error bars represent standard deviation.
