# Supplementary material for: Circular RNA hsa_circ_0062682 Binds to YBX1 and Promotes Oncogenesis in Hepatocellular Carcinoma
Source: Cancers (Basel). 2022 Sep 19;14(18):4524. doi: 10.3390/cancers14184524 (PMC9497178; doi:10.3390/cancers14184524)
Supplement: Supplementary file 1 [file cancers-14-04524-s001.zip]

Archive with 12 entries (12 files):
- cancers-1865575-supplementary data.pdf
- cancers-1865575-Supplementary-materials-sec_revision.pdf
- Table S1.xlsx
- Table S10.xlsx
- Table S2.xlsx
- Table S3.xlsx
- Table S4.xlsx
- Table S5.xlsx
- Table S6.xlsx
- Table S7.xlsx
- Table S8.xlsx
- Table S9.xlsx
