# Supplementary material for: Circular RNA hsa_circ_0062682 Binds to YBX1 and Promotes Oncogenesis in Hepatocellular Carcinoma
Source: Cancers (Basel). 2022 Sep 19;14(18):4524. doi: 10.3390/cancers14184524 (PMC9497178; doi:10.3390/cancers14184524)
Supplement: Supplementary file 1 [file cancers-14-04524-s001.zip › Table S1.xlsx]

## Sheet: Primers used for cloning
Primers used for cloning and mutagenesis
Name	Sequence	Application
Fw_SwaI_pRR	aaatTTCAGGATATCATCGATAC	Oligonucleotides used for introduction of SwaI restriction site in the pcDNA3.1(+) ZKSCAN1 MCS Exon Vector (69901, Addgene)
Rv_SwaI_pRR	aaatAAAAAGTCATTAGTACGTAC
Fw_BsiWI_pRR	acGGTTTCATTTAGGGGAAG	Oligonucleotides used for introduction of BsiWI restriction site in the pcDNA3.1(+) ZKSCAN1 MCS Exon Vector (69901, Addgene)
Rv_BsiWI_pRR	acgTCTTACCTCCGCG
Fw_circRNA_cDNA	aaatttcag-circRNA	Forward primer used for cloning of desired circRNA sequence in the PRR mini-gene system
Rv_circRNA_cDNA	nncgtacgtcttac-circRNA	Reverse primer used for cloning of desired circRNA sequence in the PRR mini-gene system
Fw_hsa_circ_0062682_cDNA	AAA TTT CAG ATG TGA GCC TGG CGG	Cloning of hsa_circ_0062682 in the pRR plasmid system
Rv_hsa_circ_0062682_cDNA	ATC GTA CGT CTT ACT TGG ACA GGG AGA CAC C
oligo_shRNA-62682_Fw	CCG GGT CTC CCT GTC CAA ATG TGA GCT CGA GCT CAC ATT TGG ACA GGG AGA CTT TTT G	Oligonucleotides used for cloning the shRNA sequence against hsa_circ_0062682 in the pLKO.1 – TRC cloning vector (10878, Addgene)
oligo_shRNA-62682_Rv	AAT TCA AAA AGT CTC CCT GTC CAA ATG TGA GCT CGA GCT CAC ATT TGG ACA GGG AGA C
Fw_pLenti_pRR	GAC GCT AGC GTT TAA ACT TAA GCT TGG TAC CG	Primers used for the amplification of hsa_circ_0062682 along with the intronic sequences from the pRR-62682 plasmid and for the amplification of control intronic sequences from the pRR system and cloned in the pLenti-CMV-MCS-GFP-SV-puro (73582, Addgene)
Rv_pLenti_pRR	TAT ACG CGT CCA TAG AGC CCA CCG CAT CC

## Sheet: Primers used for RT-qPCR
Primer sequences used for RT-qPCR
Gene	Forward/Reverse	Sequence
ACTB	Forward	CCA ACC GCG AGA AGA TGA
	Reverse	CCA GAG GCG TAC AGG GAT AG
18S rRNA	Forward	CTC AAC ACG GGA AAC CTC AC
	Reverse	CGC TCC ACC AAC TAA GAA CG
RPLP0	Forward	TGC ATC AGT ACC CCA TTC TAT CA
	Reverse	AAG GTG TAA TCC GTC TCC ACA AGA
TPST2	Forward	CCC CTT CGT CAT CAA CAA CAC
	Reverse	GAG CTT CCT AAG TGG GAG GAG
hsa_circ_0062682	Forward	TCA AGC TCA TCC TCG ACT TCC T
	Reverse	GCC AGG CTC ACA TTT GGA CA
U6 snoRNA	Forward	CTC GCT TCG GCA GCA CAT ATA CT
	Reverse	ACG CTT CAC GAA TTT GCG TGT C
RASL11A	Forward	TAT TCA CGG CTG GTC TAT GTC G
	Reverse	CAC GCA TTT GGA CAG GGA ATC
EIF6	Forward	CCG ACC AGG TGC TAG TAG GAA
	Reverse	CAG AAG GCA CAC CAG TCA TTC
XIST lncRNA	Forward	AGC TCC TCG GAC AGC TGT AA
	Reverse	CTC CAG ATA GCT GGC AAC C
hsa_circ_0062682 pulldown	Forward	GAA GTG CCT GCC TGT GTA CT
	Reverse	CTT CAG CGA CAG GTT AGC GG
TPST2 pulldown	Forward	AGC TCG GCT ATG ACC CTT ATG C
	Reverse	AGG AGG TGC TGT TCT GGT TCA C
lincNMR	Forward	CAT GGG ACA GCC CTC TGA AA
	Reverse	CTG TTT GAG GTC CTG GAC GG
HULC lncRNA	Forward	ATC TGC AAG CCA GGA AGA GTC
	Reverse	CTT GCT TGA TGC TTT GGT CTG T
AWPPH lncRNA	Forward	CTG GAT GGT CGC TGC TTT TTA
	Reverse	AGG GGG ATG AGT CGT GAT TT
HOTAIR lncRNA	Forward	CGG GAC TTA GAC CCT CAG GT
	Reverse	GTT CCA TTC CAC TGC GAA GC
circRNA-SORE	Forward	GTG CTC TAG GAG GTC AGT CC
	Reverse	GTG TGG AGT CAG AGG TAC GG
CCND1	Forward	TCTACACCGACAACTCCATCCG
	Reverse	TCTGGCATTTTGGAGAGGAAGTG
PCNA	Forward	CAAGTAATGTCGATAAAGAGGAGG
	Reverse	GTGTCACCGTTGAAGAGAGTGG
MMP2	Forward	AGCGAGTGGATGCCGCCTTTAA
	Reverse	CATTCCAGGCATCTGCGATGAG
CXCL1	Forward	AGCTTGCCTCAATCCTGCATCC
	Reverse	TCCTTCAGGAACAGCCACCAGT
NCAM1	Forward	CATCACCTGGAGGACTTCTACC
	Reverse	CAGTGTACTGGATGCTCTTCAGG
CXCR4	Forward	CTCCTCTTTGTCATCACGCTTCC
	Reverse	GGATGAGGACACTGCTGTAGAG
ABCB1	Forward	GCTGTCAAGGAAGCCAATGCCT
	Reverse	TGCAATGGCGATCCTCTGCTTC
MMP13	Forward	TCCTGATGTGGGTGAATACAATG
	Reverse	GCCATCGTGAAGTCTGGTAAAAT
CDYL	Forward	GCCGGTCGGAGCTTTATTG
	Reverse	CGGAGATGTACCTTTCCCGTT
PML	Forward	GGATGAAGTGCTACGCCTCG
	Reverse	TCCCCTGGGTGATGCAAGA
BHLHE40	Forward	GACGGGGAATAAAGCGGAGC
	Reverse	CCGGTCACGTCTCTTTTTCTC
HLF	Forward	CCACCTTTATCCCGCCTCC
	Reverse	TTTACTAAATGCGTCTTCGTGGT
INCA1	Forward	CCTAAGAAGGCGTCAGAGCAT
	Reverse	GAGAAAACGGTCCTCTTCCTG
LPXN	Forward	CCACCACCTTCTAAAACGTCAG
	Reverse	CCCAAGCATTGAGTCCAGGG
ATF3	Forward	CGCTGGAATCAGTCACTGTCAG
	Reverse	CTTGTTTCGGCACTTTGCAGCTG
DDIT3	Forward	GGTATGAGGACCTGCAAGAGGT
	Reverse	CTTGTGACCTCTGCTGGTTCTG
ERO1B	Forward	GCTTGTGTGATATTGACAGCATCG
	Reverse	CCAGAAAGGACAAGGTCGCTTC
PARM1	Forward	GTCAGGCAAAGTGATGTGTGAGC
	Reverse	GGCAATGACTGTCACGGTAATGG
HERPUD1	Forward	CCAATGTCTCAGGGACTTGCTTC
	Reverse	CGATTAGAACCAGCAGGCTCCT
EEF1A2	Forward	CCATGTGTGTGGAGAGCTTCTC
	Reverse	TCTCCACGTTCTTGATGACGCC
JUN	Forward	CCTTGAAAGCTCAGAACTCGGAG
	Reverse	TGCTGCGTTAGCATGAGTTGGC
NFATC2	Forward	GATAGTGGGCAACACCAAAGTCC
	Reverse	TCTCGCCTTTCCGCAGCTCAAT
GPC6	Forward	TATGGCTCTCCGTGTGATGACC
	Reverse	ACACGTCATCCATGCACCCACT
RUNX1	Forward	CCACCTACCACAGAGCCATCAA
	Reverse	TTCACTGAGCCGCTCGGAAAAG
HYOU	Forward	CTTCAACCTGGATGAGAGTGGC
	Reverse	ACAGGCTGGAAATGGTGTTGCC
DDIT4	Forward	GTTTGACCGCTCCACGAGCCT
	Reverse	GCACACAAGTGTTCATCCTCAGG

## Sheet: siRNA sequences
siRNA sequences
Name	Sense/antisense strand	Sequence
siRNA-62682.1	Sense	(GGU GUC UCC CUG UCC AAA UGU )TT
	Antisense	(ACA UUU GGA CAG GGA GAC ACC )TT
siRNA-62682.2	Sense	(GUC UCC CUG UCC AAA UGU GAG )TT
	Antisense	(CUC ACA UUU GGA CAG GGA GAC )TT
siRNA-control	Sense	(AGG UAG UGU AAU CGC CUU G)TT
	Antisense	(CAA GGC GAU UAC ACU ACC U)TT

## Sheet: Biotinylated pulldowns
Oligonucleotide sequences used for biotinylated pulldown
Target	Sense/antisense	Sequence
hsa_circ_0062682	antisense	CCC GCC AGG CTC ACA TTT GGA CAG GGA GAC AC [BIO]
hsa_circ_0062682	sense	GTG TCT CCC TGT CCA AAT GTG AGC CTG GCG GG [BIO]
eGFP mRNA	antisense	AAG ATG GTG CGC TCC TGG ACG TAG CCT TCG GG [BIO]
