# Supplementary material for: Circular RNA hsa_circ_0062682 Binds to YBX1 and Promotes Oncogenesis in Hepatocellular Carcinoma
Source: Cancers (Basel). 2022 Sep 19;14(18):4524. doi: 10.3390/cancers14184524 (PMC9497178; doi:10.3390/cancers14184524)
Supplement: Supplementary file 1 [file cancers-14-04524-s001.zip › Table S2.xlsx]

## Sheet: Sheet1
Upregulated in HCC (FC ≥ 1,5, FDR ≤ 0,05)
Arraystar Anotation	circBase Anotation	Genomic length (nt)	circRNA length (nt)	Best transcript	Gene symbol
hsa_circRNA_103809	hsa_circ_0072088	9560	693	NM_016107	ZFR
hsa_circRNA_101555	hsa_circ_0001955	13632	815	NM_022048	CSNK1G1
hsa_circRNA_102034	hsa_circ_0005397	2383	233	NM_001033568	RHOT1
hsa_circRNA_101287	hsa_circ_0008274	4276	244	NM_020121	UGGT2
hsa_circRNA_101408	hsa_circ_0032704	13686	457	NM_015072	TTLL5
hsa_circRNA_104760	hsa_circ_0003945	2862	258	NM_018449	UBAP2
hsa_circRNA_103948	hsa_circ_0003528	11763	741	NM_021982	SEC24A
hsa_circRNA_001059	hsa_circ_0000554	282	282	NM_001024674	LIN52
hsa_circRNA_101707	hsa_circ_0000673	343	251	NM_015659	RSL1D1
hsa_circRNA_400071	hsa_circ_0092283	300	300	NM_002473	MYH9
hsa_circRNA_101777	hsa_circ_0038718	2074	227	NM_000418	IL4R
hsa_circRNA_104640	hsa_circ_0001806	10218	432	NM_024790	CSPP1
hsa_circRNA_102587	hsa_circ_0051732	127	127	NM_000234	LIG1
hsa_circRNA_100445	hsa_circ_0016404	332	166	NM_001146171	TATDN3
hsa_circRNA_101748	hsa_circ_0003645	7205	356	NM_020314	C16orf62
hsa_circRNA_000764	hsa_circ_0001834	169	169	NM_003070	SMARCA2
hsa_circRNA_100053	hsa_circ_0009910	3526	315	NM_014874	MFN2
hsa_circRNA_102482	hsa_circ_0049997	1217	210	NM_012088	PGLS
hsa_circRNA_102430	hsa_circ_0048937	2662	366	NM_001974	EMR1
hsa_circRNA_001506	hsa_circ_0000981	96	96	NM_014713	LAPTM4A
hsa_circRNA_103563	hsa_circ_0008583	28619	496	NM_004087	DLG1
hsa_circRNA_103188	hsa_circ_0062682	930	930	NM_001008566	TPST2
hsa_circRNA_000956	hsa_circ_0001489	277	277	NM_001165899	PDE4D
hsa_circRNA_100367	hsa_circ_0014879	24224	1059	NR_028103	DCAF8
hsa_circRNA_101144	hsa_circ_0028196	7941	419	NM_016238	ANAPC7
hsa_circRNA_104499	hsa_circ_0082564	508	227	NM_194071	CREB3L2
hsa_circRNA_400087	#N/A
hsa_circRNA_101441	hsa_circ_0033408	88640	3861	NM_014844	TECPR2
hsa_circRNA_105027	hsa_circ_0006789	173	173	NM_145305	SLC25A43
hsa_circRNA_001067	hsa_circ_0000644	196	196	NM_018689	KIAA1199
hsa_circRNA_000872	hsa_circ_0000747	614	614	NM_004475	FLOT2
hsa_circRNA_104993	hsa_circ_0001917	11092	402	NM_001126055	CASK
Downregulated in HCC (FC ≥ - 1,5, FDR ≤ 0,05)
Arraystar Anotation	circBase Anotation	Genomic length (nt)	circRNA length (nt)	Best transcript	Gene symbol
hsa_circRNA_102055	hsa_circ_0043302	165	165	NR_036750	LOC440434
hsa_circRNA_104224	hsa_circ_0078279	22859	539	NM_016166	PIAS1
hsa_circRNA_104211	hsa_circ_0007762	3428	182	NM_001172435	RAB3GAP1
hsa_circRNA_102824	hsa_circ_0056548	66409	1345	NM_001242767	MTHFD1L
hsa_circRNA_101575	hsa_circ_0036044	17590	407	NM_001127715	STXBP5
hsa_circRNA_102166	hsa_circ_0004913	17316	495	NM_018469	TEX2
