# Supplementary material for: Circular RNA hsa_circ_0062682 Binds to YBX1 and Promotes Oncogenesis in Hepatocellular Carcinoma
Source: Cancers (Basel). 2022 Sep 19;14(18):4524. doi: 10.3390/cancers14184524 (PMC9497178; doi:10.3390/cancers14184524)
Supplement: Supplementary file 1 [file cancers-14-04524-s001.zip › Table S3.xlsx]

## Sheet: SNU449 KD TAC
Transcriptomic analysis of a SNU-449 stable knockdown of hsa_circ_0062682 (knockdown (2) vs. control (1))
ID	2 Avg (log2)	1 Avg (log2)	2 Standard Deviation	1 Standard Deviation	2 Expressed	1 Expressed	Fold Change	P-val	FDR P-val	Expressed in Both Conditions	Public Gene IDs	Gene Symbol	Description	Group
TC0200015678.hg.1	13,54	7,49	0,13	0,34	T	T	66,45	1,05E-12	7,52E-09	T	NM_000599; ENST00000233813; ENST00000449583; ENST00000486341; BC011453; OTTHUMT00000256674; OTTHUMT00000339428; OTTHUMT00000339429	IGFBP5	insulin like growth factor binding protein 5	Multiple_Complex
TC0300013950.hg.1	5,61	9,93	0,07	0,09	T	T	-19,98	8,49E-13	7,52E-09	T	NM_144715; ENST00000295824; ENST00000389256; ENST00000440022; ENST00000467602; ENST00000498089; BC028198; OTTHUMT00000318673; OTTHUMT00000339751; OTTHUMT00000339752; OTTHUMT00000339754; OTTHUMT00000339755	EFHB	EF-hand domain family, member B	Multiple_Complex
TC1600011398.hg.1	11,7	6,09	0,07	0,24	T	T	49,1	1,05E-12	7,52E-09	T	NM_001127891; NM_001302508; NM_001302509; NM_001302510; NM_004530; ENST00000219070; ENST00000437642; ENST00000543485; ENST00000564864; ENST00000566564; ENST00000568715; ENST00000570283; BC002576; OTTHUMT00000256913; OTTHUMT00000433258; OTTHUMT00000433259; OTTHUMT00000433260; OTTHUMT00000433261; OTTHUMT00000433262; OTTHUMT00000433263	MMP2	matrix metallopeptidase 2	Multiple_Complex
TC0200011138.hg.1	12,09	7,83	0,02	0,22	T	T	19,18	4,15E-12	1,48E-08	T	NM_000463; NM_001072; NM_007120; NM_019075; NM_019076; NM_019077; NM_019078; NM_019093; NM_021027; NM_205862; ENST00000305139; ENST00000305208; ENST00000344644; ENST00000354728; ENST00000360418; ENST00000373409; ENST00000373414; ENST00000373424; ENST00000373426; ENST00000373445; ENST00000373450; ENST00000406651; ENST00000441351; ENST00000446481; ENST00000450233; ENST00000478062; ENST00000480628; …	UGT1A1; UGT1A6; UGT1A4; UGT1A10; UGT1A8; UGT1A7; UGT1A5; UGT1A3; UGT1A9	UDP glucuronosyltransferase 1 family, polypeptide A1; UDP glucuronosyltransferase 1 family, polypeptide A6; UDP glucuronosyltransferase 1 family, polypeptide A4; UDP glucuronosyltransferase 1 family, polypeptide A10; UDP glucuronosyltransferase 1 family, polypeptide A8; UDP glucuronosyltransferase 1 family, polypeptide A7; UDP glucuronosyltransferase 1 family, polypeptide A5; UDP glucuronosyltran…	Multiple_Complex
TC1500010407.hg.1	12,66	7,87	0,1	0,24	T	T	27,68	2,84E-12	1,48E-08	T	NM_001150; ENST00000300060; ENST00000558177; ENST00000558740; ENST00000559761; ENST00000559874; ENST00000559887; ENST00000560028; ENST00000560030; ENST00000560137; BC058928; OTTHUMT00000313425; OTTHUMT00000416686; OTTHUMT00000416687; OTTHUMT00000416688; OTTHUMT00000416689; OTTHUMT00000416690; OTTHUMT00000416691; OTTHUMT00000416692; OTTHUMT00000416955	ANPEP	alanyl (membrane) aminopeptidase	Multiple_Complex
TSUnmapped00000571.hg.1	13,95	10,1	0,02	0,13	T	T	14,41	4,06E-12	1,48E-08	T	ENST00000633992	GREM1	gremlin 1, DAN family BMP antagonist [Source:HGNC Symbol;Acc:HGNC:2001]	Coding
TC0600012709.hg.1	11,62	7,29	0,15	0,26	T	T	20,06	7,22E-12	1,72E-08	T	NM_022361; NR_024539; ENST00000254765; ENST00000429112; ENST00000474760; ENST00000489134; BC022323; OTTHUMT00000041651; OTTHUMT00000041652; OTTHUMT00000041653; OTTHUMT00000041654	POPDC3	popeye domain containing 3	Multiple_Complex
TC1100012131.hg.1	6,49	10,94	0,14	0,15	T	T	-21,84	5,83E-12	1,72E-08	T	NM_001145938; NM_002421; ENST00000315274; BC013875; OTTHUMT00000109632	MMP1	matrix metallopeptidase 1	Multiple_Complex
TC1600007931.hg.1	13,42	8,85	0,02	0,17	T	T	23,7	6,87E-12	1,72E-08	T	NM_017839; ENST00000262134; ENST00000562299; ENST00000563095; ENST00000564084; ENST00000565056; ENST00000566375; ENST00000566911; ENST00000566915; ENST00000615823; BC002472; OTTHUMT00000256977; OTTHUMT00000433264; OTTHUMT00000433265; OTTHUMT00000433266; OTTHUMT00000433267; OTTHUMT00000433268; OTTHUMT00000433269; OTTHUMT00000433270	LPCAT2	lysophosphatidylcholine acyltransferase 2	Multiple_Complex
TC0400012245.hg.1	11,83	6,34	0,13	0,37	T	T	45,06	1,38E-11	2,90E-08	T	NM_001031700; NM_001128424; NM_016613; ENST00000296530; ENST00000393807; ENST00000585682; ENST00000587787; ENST00000589306; ENST00000590648; ENST00000592057; ENST00000592586; ENST00000593260; BC043193; OTTHUMT00000365227; OTTHUMT00000365228; OTTHUMT00000365229; OTTHUMT00000365230; OTTHUMT00000365232; OTTHUMT00000365233; OTTHUMT00000365234; OTTHUMT00000460767; OTTHUMT00000460768	FAM198B	family with sequence similarity 198, member B	Multiple_Complex
TC0X00006865.hg.1	6,16	10,7	0,23	0,08	T	T	-23,31	1,49E-11	2,90E-08	T	NM_014271; ENST00000302196; ENST00000378993; BC126345; BC126347; OTTHUMT00000056155	IL1RAPL1	interleukin 1 receptor accessory protein-like 1	Coding
TC0400009064.hg.1	8,08	12,88	0,23	0,11	T	T	-27,91	1,77E-11	3,17E-08	T	NM_001184741; NM_005141; ENST00000302068; ENST00000425838; ENST00000473984; ENST00000497097; ENST00000498375; ENST00000502545; ENST00000509493; BC106760; BC107766; OTTHUMT00000317595; OTTHUMT00000317596; OTTHUMT00000317597; OTTHUMT00000317598; OTTHUMT00000317599; OTTHUMT00000365255; OTTHUMT00000365256	FGB	fibrinogen beta chain	Multiple_Complex
TC0800006837.hg.1	11,3	7	0,22	0,03	T	T	19,81	2,52E-11	4,16E-08	T	NM_006765; NM_178234; ENST00000382020; ENST00000503191; ENST00000503731; ENST00000506802; ENST00000507316; ENST00000507400; ENST00000508446; ENST00000509177; ENST00000509380; ENST00000510836; ENST00000511342; ENST00000511783; ENST00000515859; BC010370; OTTHUMT00000211620; OTTHUMT00000365363; OTTHUMT00000365364; OTTHUMT00000365365; OTTHUMT00000365366; OTTHUMT00000365367; OTTHUMT00000365368; OTTHUM…	TUSC3	tumor suppressor candidate 3	Multiple_Complex
TC1800007198.hg.1	12,15	5,97	0,16	0,38	T	T	72,35	3,25E-11	4,98E-08	T	NM_001128588; NM_001146036; NM_001146037; NM_001308278; NM_001308279; NM_015865; ENST00000321925; ENST00000402943; ENST00000415427; ENST00000436407; ENST00000502059; ENST00000535474; ENST00000586056; ENST00000586142; ENST00000586854; ENST00000586951; ENST00000587601; ENST00000588179; ENST00000589322; ENST00000589700; ENST00000589891; ENST00000590246; ENST00000590377; ENST00000591541; ENST00000591…	SLC14A1	solute carrier family 14 (urea transporter), member 1 (Kidd blood group)	Multiple_Complex
TC0800010234.hg.1	13,25	9,19	0,04	0,3	T	T	16,72	4,22E-11	5,65E-08	T	NM_003012; ENST00000220772; ENST00000379845; BC036503; OTTHUMT00000377132; OTTHUMT00000377133	SFRP1	secreted frizzled-related protein 1	Multiple_Complex
TC1500006788.hg.1	13,56	9,42	0,13	0,14	T	T	17,56	4,08E-11	5,65E-08	T	NM_001191322; NM_001191323; NM_013372; ENST00000560677; ENST00000560830; ENST00000622074; BC069525; BC093778; BC101611; OTTHUMT00000251455; OTTHUMT00000417302; OTTHUMT00000417303	GREM1	gremlin 1, DAN family BMP antagonist	Multiple_Complex
TC0100013272.hg.1	10,66	7,4	0,17	0,15	T	T	9,6	5,49E-11	6,43E-08	T	NM_000864; ENST00000374619; BC007720; OTTHUMT00000008924; uc001bgn.3	HTR1D	5-hydroxytryptamine (serotonin) receptor 1D, G protein-coupled	Coding
TC1400009299.hg.1	8,46	11,3	0,14	0,04	T	T	-7,16	5,18E-11	6,43E-08	T	NM_001283056; NM_001283057; NM_001283058; NM_001283059; NM_001283060; NM_018168; ENST00000216445; ENST00000422976; ENST00000524996; ENST00000526336; ENST00000526745; ENST00000527032; ENST00000529860; ENST00000530417; ENST00000532286; ENST00000534126; ENST00000534528; BC117405; BC143566; BC143567; OTTHUMT00000276921; OTTHUMT00000385645; OTTHUMT00000385646; OTTHUMT00000385647; OTTHUMT00000385648; O…	C14orf105	chromosome 14 open reading frame 105	Multiple_Complex
TC0200015958.hg.1	13,81	10,75	0,11	0,13	T	T	8,33	5,70E-11	6,43E-08	T	NM_139072; ENST00000341772; ENST00000482831; BC035009; OTTHUMT00000331902; OTTHUMT00000331903	DNER	delta/notch like EGF repeat containing	Multiple_Complex
TC1700010997.hg.1	10,08	6,18	0,18	0,19	T	T	14,97	6,49E-11	6,96E-08	T	NM_024017; ENST00000311177; BC015565; OTTHUMT00000358101	HOXB9	homeobox B9	Multiple_Complex
TC1000012169.hg.1	9,61	6,73	0,09	0,1	T	T	7,34	8,92E-11	9,11E-08	T	NM_001288973; NM_001288974; NM_001288975; NM_003474; NM_021641; ENST00000368676; ENST00000368679; ENST00000448723; ENST00000467145; ENST00000482291; ENST00000485388; ENST00000494661; BC060804; OTTHUMT00000050961; OTTHUMT00000050962; OTTHUMT00000050963; OTTHUMT00000050964; OTTHUMT00000050965; OTTHUMT00000050966; OTTHUMT00000050967	ADAM12	ADAM metallopeptidase domain 12	Multiple_Complex
TC0400008972.hg.1	11,41	8,14	0,16	0,14	T	T	9,61	1,02E-10	9,99E-08	T	NM_001040260; NM_001040261; NR_036614; ENST00000296550; ENST00000302176; ENST00000411937; ENST00000506325; ENST00000507694; OTTHUMT00000364952; OTTHUMT00000364953; OTTHUMT00000364954; OTTHUMT00000364955; OTTHUMT00000364956	DCLK2	doublecortin-like kinase 2	Multiple_Complex
TC0300006856.hg.1	8,17	4,62	0,15	0,07	T	F	11,65	1,26E-10	1,14E-07	F	NM_000965; NM_001290216; NM_001290217; NM_001290266; NM_001290276; NM_001290277; NM_001290300; NM_016152; NR_110892; NR_110893; ENST00000330688; ENST00000383772; ENST00000437042; ENST00000458646; ENST00000462272; ENST00000479097; ENST00000480001; ENST00000489694; BC060794; BC069735; OTTHUMT00000252879; OTTHUMT00000340847; OTTHUMT00000340848; OTTHUMT00000340849; OTTHUMT00000340850; OTTHUMT00000340…	RARB	retinoic acid receptor, beta	Multiple_Complex
TC0400008628.hg.1	9,66	12,75	0,14	0,2	T	T	-8,55	1,27E-10	1,14E-07	T	NM_001258038; NM_001258039; NM_005841; NM_199327; ENST00000339241; ENST00000394339; ENST00000505319; ENST00000507703; ENST00000508849; ENST00000515726; ENST00000610581; ENST00000622283; BC063856; OTTHUMT00000256711; OTTHUMT00000363944; OTTHUMT00000363945; OTTHUMT00000363946; OTTHUMT00000363947; OTTHUMT00000363948	SPRY1	sprouty RTK signaling antagonist 1	Multiple_Complex
TSUnmapped00000594.hg.1	14,17	10,18	0,19	0,26	T	T	15,84	1,86E-10	1,48E-07	T	ENST00000632478	GREM1	gremlin 1, DAN family BMP antagonist [Source:HGNC Symbol;Acc:HGNC:2001]	Coding
TC0700008293.hg.1	9,93	6,97	0,14	0,23	T	T	7,82	1,82E-10	1,48E-07	T	NM_001040665; NM_001040666; NM_001244944; NM_001244945; NM_001244946; NM_152999; ENST00000287908; ENST00000394621; ENST00000394622; ENST00000394626; ENST00000394629; ENST00000394632; ENST00000402625; ENST00000426158; ENST00000428074; ENST00000482369; OTTHUMT00000059662; OTTHUMT00000139682; OTTHUMT00000139683; OTTHUMT00000139684; OTTHUMT00000139686; OTTHUMT00000258055; OTTHUMT00000258056; OTTHUMT0…	STEAP2	STEAP family member 2, metalloreductase	Multiple_Complex
TC1400007860.hg.1	10,75	8,11	0,11	0,16	T	T	6,24	1,86E-10	1,48E-07	T	NM_013231; ENST00000330753; ENST00000553627; ENST00000553650; ENST00000554746; ENST00000555398; ENST00000556335; ENST00000557419; BC126249; BC130290; BC143936; OTTHUMT00000413193; OTTHUMT00000413194; OTTHUMT00000413195; OTTHUMT00000413196; OTTHUMT00000413198; OTTHUMT00000413199; OTTHUMT00000413200	FLRT2	fibronectin leucine rich transmembrane protein 2	Multiple_Complex
TC0200015893.hg.1	13,83	11,18	0,07	0,13	T	T	6,31	2,47E-10	1,85E-07	T	NM_001290263; NM_014689; ENST00000258390; ENST00000409592; ENST00000422684; ENST00000435582; ENST00000458608; ENST00000471810; ENST00000472652; ENST00000474102; ENST00000489831; ENST00000492251; ENST00000492369; ENST00000535663; ENST00000543715; OTTHUMT00000331158; OTTHUMT00000331159; OTTHUMT00000331231; OTTHUMT00000331232; OTTHUMT00000331233; OTTHUMT00000331234; OTTHUMT00000331235; OTTHUMT000003…	DOCK10	dedicator of cytokinesis 10	Multiple_Complex
TC0X00010107.hg.1	8,95	6,42	0,01	0,16	T	T	5,74	2,58E-10	1,85E-07	T	NM_001146256; NM_001146257; NM_144969; ENST00000373367; ENST00000482827; ENST00000541184; BC103980; BC103981; BC103982; OTTHUMT00000057283; OTTHUMT00000057284	ZDHHC15	zinc finger, DHHC-type containing 15	Multiple_Complex
TC1400010772.hg.1	9,46	6,57	0,03	0,23	T	T	7,39	2,50E-10	1,85E-07	T	NM_000793; NM_001007023; NM_001242502; NM_001242503; NM_013989; ENST00000422005; ENST00000438257; ENST00000553968; ENST00000555750; ENST00000555844; ENST00000556811; ENST00000557010; ENST00000557125; BC074882; BC136514; OTTHUMT00000413428; OTTHUMT00000413750; OTTHUMT00000413751; OTTHUMT00000413752; OTTHUMT00000413753; OTTHUMT00000413754; OTTHUMT00000413756	DIO2	deiodinase, iodothyronine, type II	Coding
TC0900008545.hg.1	12,17	9,04	0,19	0,25	T	T	8,76	3,67E-10	2,46E-07	T	NM_002581; ENST00000328252; ENST00000460463; ENST00000483254; BC078657; OTTHUMT00000055546; OTTHUMT00000055547; OTTHUMT00000055548	PAPPA	pregnancy-associated plasma protein A, pappalysin 1	Multiple_Complex
TC1700007557.hg.1	14,71	12,19	0,05	0,21	T	T	5,75	3,58E-10	2,46E-07	T	NM_002982; ENST00000225831; ENST00000580907; ENST00000582017; ENST00000624362; BC009716; OTTHUMT00000256384; OTTHUMT00000447595; OTTHUMT00000447596; OTTHUMT00000447597	CCL2	chemokine (C-C motif) ligand 2	Multiple_Complex
TC0100016983.hg.1	8,91	4,22	0,37	0,4	T	F	25,75	4,46E-10	2,85E-07	F	NM_001276; ENST00000255409; ENST00000404436; ENST00000472064; ENST00000473185; ENST00000478742; BC008568; BC038354; BC039132; OTTHUMT00000100265; OTTHUMT00000100266; OTTHUMT00000100267; OTTHUMT00000100268; OTTHUMT00000101315	CHI3L1	chitinase 3-like 1 (cartilage glycoprotein-39)	Multiple_Complex
TC0400009258.hg.1	11,83	9,27	0,11	0,13	T	T	5,88	4,51E-10	2,85E-07	T	NM_001166108; NM_001166109; NM_001166110; NM_016081; ENST00000261509; ENST00000393726; ENST00000503290; ENST00000503457; ENST00000504519; ENST00000505667; ENST00000507325; ENST00000507699; ENST00000507735; ENST00000508898; ENST00000510998; ENST00000511611; ENST00000511682; ENST00000511948; ENST00000512127; ENST00000513187; ENST00000513245; BC140850; BC144666; OTTHUMT00000363761; OTTHUMT0000036376…	PALLD	palladin, cytoskeletal associated protein	Multiple_Complex
TC0X00011403.hg.1	12,6	9,71	0,04	0,24	T	T	7,39	5,40E-10	3,31E-07	T	NM_032417; ENST00000370515; BC103961; BC121070; BC134418; OTTHUMT00000058598	SPANXD	SPANX family, member D	Coding
TC0600009783.hg.1	7,97	5,46	0,21	0,09	T	F	5,69	5,71E-10	3,40E-07	F	NM_005715; ENST00000367463; ENST00000466695; ENST00000473631; BC093668; BC093694; OTTHUMT00000043363; OTTHUMT00000043364; OTTHUMT00000043365	UST	uronyl-2-sulfotransferase	Multiple_Complex
TC1200010109.hg.1	4,58	7,74	0,26	0,14	F	T	-8,9	6,18E-10	3,49E-07	F	NM_001174097; NM_002300; ENST00000350669; ENST00000396075; ENST00000396076; ENST00000450584; ENST00000470280; ENST00000470985; ENST00000535112; ENST00000539782; ENST00000542765; ENST00000544151; BC002362; BC015122; BC071860; OTTHUMT00000258219; OTTHUMT00000258220; OTTHUMT00000258221; OTTHUMT00000258222; OTTHUMT00000258224; OTTHUMT00000402397; OTTHUMT00000402398; OTTHUMT00000402399; OTTHUMT0000040…	LDHB	lactate dehydrogenase B	Multiple_Complex
TC2000008267.hg.1	9,39	11,83	0,05	0,14	T	T	-5,44	6,10E-10	3,49E-07	T	NM_014737; NM_170774; ENST00000379376; ENST00000379400; ENST00000478553; BC117118; BC117120; OTTHUMT00000077828; OTTHUMT00000077829; uc002wlc.3; uc002wlf.3	RASSF2	Ras association (RalGDS/AF-6) domain family member 2	Multiple_Complex
TC0900008953.hg.1	11,59	9,31	0,03	0,14	T	T	4,88	8,24E-10	4,53E-07	T	NM_000050; NM_054012; ENST00000352480; ENST00000372386; ENST00000372393; ENST00000372394; ENST00000422569; ENST00000443588; ENST00000467695; ENST00000470849; ENST00000492400; ENST00000493984; BC009243; BC021676; OTTHUMT00000054649; OTTHUMT00000054650; OTTHUMT00000054651; OTTHUMT00000054652; OTTHUMT00000054653; OTTHUMT00000054654; OTTHUMT00000054655; OTTHUMT00000054656; OTTHUMT00000054657; OTTHUMT…	ASS1	argininosuccinate synthase 1	Multiple_Complex
TC0100012167.hg.1	9,88	7,53	0,05	0,05	T	T	5,12	8,89E-10	4,65E-07	T	NM_003679; ENST00000366555; ENST00000366557; ENST00000366558; ENST00000366559; ENST00000431245; ENST00000477907; ENST00000480967; ENST00000481087; ENST00000484229; ENST00000484628; BC005297; OTTHUMT00000095612; OTTHUMT00000095613; OTTHUMT00000095614; OTTHUMT00000095615; OTTHUMT00000095616; OTTHUMT00000095617; OTTHUMT00000095618; OTTHUMT00000095619; OTTHUMT00000095620; OTTHUMT00000099248	KMO	kynurenine 3-monooxygenase (kynurenine 3-hydroxylase)	Multiple_Complex
TC1200010182.hg.1	13,65	11,34	0,09	0,19	T	T	4,95	8,87E-10	4,65E-07	T	NM_030762; ENST00000242728; ENST00000394326; ENST00000541271; BC025968; OTTHUMT00000402714; OTTHUMT00000402715; OTTHUMT00000402716	BHLHE41	basic helix-loop-helix family, member e41	Multiple_Complex
TC0100017748.hg.1	12,75	9,78	0,19	0,2	T	T	7,83	9,34E-10	4,77E-07	T	NM_020808; ENST00000262861; ENST00000308942; ENST00000366630; ENST00000486472; ENST00000494056; ENST00000495863; BC150334; OTTHUMT00000092318; OTTHUMT00000092319; OTTHUMT00000092320; OTTHUMT00000092321; OTTHUMT00000092322	SIPA1L2	signal-induced proliferation-associated 1 like 2	Multiple_Complex
TC0300011941.hg.1	9,23	11,53	0,11	0,03	T	T	-4,94	9,63E-10	4,80E-07	T	NM_014981; ENST00000273353; ENST00000478998; ENST00000495753; OTTHUMT00000353935; OTTHUMT00000353936; OTTHUMT00000353937; uc003dxa.1	MYH15	myosin, heavy chain 15	Multiple_Complex
TC1200010538.hg.1	13,31	10,98	0,15	0,09	T	T	5,02	1,04E-09	5,06E-07	T	NM_001143668; NM_181847; ENST00000266581; ENST00000429635; ENST00000550413; BC047595; BC095477; OTTHUMT00000405075; OTTHUMT00000405076; OTTHUMT00000405078	AMIGO2	adhesion molecule with Ig-like domain 2	Coding
TC2000009604.hg.1	13,13	10,84	0,13	0,05	T	T	4,88	1,06E-09	5,06E-07	T	NM_001255976; NM_020182; NM_199169; NM_199170; NM_199171; ENST00000265626; ENST00000341744; ENST00000347215; ENST00000395814; ENST00000395816; ENST00000395819; ENST00000414037; ENST00000472841; BC080635; OTTHUMT00000079858; OTTHUMT00000079859; OTTHUMT00000079860; OTTHUMT00000267812; OTTHUMT00000267813; OTTHUMT00000267814; OTTHUMT00000267815	PMEPA1	prostate transmembrane protein, androgen induced 1	Multiple_Complex
TC0100017193.hg.1	11,25	8,1	0,14	0,29	T	T	8,91	1,55E-09	7,25E-07	T	NM_002238; NM_172362; ENST00000271751; ENST00000367007; BC113709; BC143599; OTTHUMT00000088332; OTTHUMT00000088568	KCNH1	potassium channel, voltage gated eag related subfamily H, member 1	Multiple_Complex
TC0500012388.hg.1	10,57	7,53	0,15	0,23	T	T	8,21	1,73E-09	7,90E-07	T	NM_001197294; NM_001387; ENST00000343218; ENST00000398514; ENST00000504965; ENST00000507309; ENST00000508042; ENST00000512722; ENST00000519672; ENST00000520473; ENST00000523458; BC039006; BC077077; OTTHUMT00000373421; OTTHUMT00000373422; OTTHUMT00000373423; OTTHUMT00000373424; OTTHUMT00000373425; OTTHUMT00000373426; OTTHUMT00000377410; OTTHUMT00000377411; OTTHUMT00000377412	DPYSL3	dihydropyrimidinase-like 3	Multiple_Complex
TC1200007053.hg.1	9,72	11,89	0,06	0,21	T	T	-4,5	1,86E-09	8,32E-07	T	NM_030572; ENST00000256969; ENST00000535033; ENST00000535139; ENST00000537527; ENST00000543800; ENST00000544637; ENST00000546199; BC004336; OTTHUMT00000402389; OTTHUMT00000402390; OTTHUMT00000402391; OTTHUMT00000402392; OTTHUMT00000402393; OTTHUMT00000402394; OTTHUMT00000402395	SPX	spexin hormone	Multiple_Complex
TC0600013280.hg.1	5,37	8,42	0,28	0,18	F	T	-8,28	2,06E-09	9,01E-07	F	NM_005923; ENST00000359015; ENST00000463140; BC054503; BC088829; OTTHUMT00000042383; OTTHUMT00000042384	MAP3K5	mitogen-activated protein kinase kinase kinase 5	Multiple_Complex
TC0600008697.hg.1	14,46	16,22	0,08	0,06	T	T	-3,38	2,21E-09	9,20E-07	T	NM_001204813; NM_002526; ENST00000257770; ENST00000369646; ENST00000369651; ENST00000416334; ENST00000437581; BC065937; OTTHUMT00000041388; OTTHUMT00000041389; OTTHUMT00000041390; OTTHUMT00000041391; uc010kbr.3	NT5E	5-nucleotidase, ecto (CD73)	Multiple_Complex
TC0X00011402.hg.1	13,74	10,91	0,08	0,32	T	T	7,12	2,23E-09	9,20E-07	T	NM_013453; ENST00000370519; OTTHUMT00000058599	SPANXA1	sperm protein associated with the nucleus, X-linked, family member A1	Coding
TC1200007146.hg.1	11,23	9	0,24	0,08	T	T	4,69	2,20E-09	9,20E-07	T	NM_015000; ENST00000389032; ENST00000407753; ENST00000434385; ENST00000536093; ENST00000539863; ENST00000540996; ENST00000541191; ENST00000543246; ENST00000543992; ENST00000544367; ENST00000544969; ENST00000545470; ENST00000546286; BC028603; OTTHUMT00000403296; OTTHUMT00000403297; OTTHUMT00000403298; OTTHUMT00000403299; OTTHUMT00000403300; OTTHUMT00000403301; OTTHUMT00000403302; OTTHUMT0000040330…	STK38L	serine/threonine kinase 38 like	Multiple_Complex
TC0100010579.hg.1	10,27	8,28	0,04	0,06	T	T	3,97	2,46E-09	9,76E-07	T	NM_001002294; NM_006894; ENST00000367755; ENST00000472784; ENST00000478457; ENST00000479749; ENST00000530212; ENST00000534514; BC032016; OTTHUMT00000086219; OTTHUMT00000086220; OTTHUMT00000086221; OTTHUMT00000086222; OTTHUMT00000394472; OTTHUMT00000394473; uc001ghi.3	FMO3	flavin containing monooxygenase 3	Multiple_Complex
TC2000007191.hg.1	13,13	11,12	0,04	0,08	T	T	4,05	2,46E-09	9,76E-07	T	NM_001281727; NM_001281728; NM_001281729; NM_014183; NM_177953; NR_104032; ENST00000300469; ENST00000357156; ENST00000374846; ENST00000480759; BC002481; OTTHUMT00000078790; OTTHUMT00000078791; OTTHUMT00000078792; OTTHUMT00000078793	DYNLRB1	dynein, light chain, roadblock-type 1	Multiple_Complex
TC0X00008608.hg.1	13,62	10,79	0,09	0,32	T	T	7,13	2,56E-09	9,80E-07	T	NM_145662; ENST00000370518; OTTHUMT00000058600	SPANXA2	SPANX family, member A2	Coding
TC1200011002.hg.1	13,09	11,01	0,1	0,18	T	T	4,23	2,53E-09	9,80E-07	T	NM_001136051; NM_153377; ENST00000320743; ENST00000379141; ENST00000433272; ENST00000547329; ENST00000548968; ENST00000550304; ENST00000550825; ENST00000552267; ENST00000552646; BC126169; BC126171; OTTHUMT00000406622; OTTHUMT00000406623; OTTHUMT00000406624; OTTHUMT00000406625; OTTHUMT00000406626; OTTHUMT00000406628; OTTHUMT00000406629; OTTHUMT00000406630; OTTHUMT00000406631	LRIG3	leucine-rich repeats and immunoglobulin-like domains 3	Multiple_Complex
TC0300009301.hg.1	8,61	10,67	0,15	0,1	T	T	-4,18	2,70E-09	1,02E-06	T	NM_002852; ENST00000295927; BC039733; OTTHUMT00000352028	PTX3	pentraxin 3, long	Coding
TC0800011683.hg.1	8,95	5,7	0,1	0,15	T	T	9,55	2,91E-09	1,08E-06	T	NM_001242463; NM_058229; NM_148177; ENST00000287396; ENST00000443022; ENST00000517956; ENST00000520511; ENST00000521719; ENST00000524000; BC024030; BC120963; BC120964; OTTHUMT00000381281; OTTHUMT00000381282; OTTHUMT00000381283; OTTHUMT00000381284; OTTHUMT00000381285; OTTHUMT00000381286	FBXO32	F-box protein 32	Multiple_Complex
TC0600011059.hg.1	8,39	10,83	0,25	0,1	T	T	-5,42	3,23E-09	1,18E-06	T	NM_001195610; NM_016356; ENST00000378450; ENST00000378454; ENST00000436313; BC050704; OTTHUMT00000043604; OTTHUMT00000043605; OTTHUMT00000043606	DCDC2	doublecortin domain containing 2	Coding
TC1800008358.hg.1	12,28	10,34	0,04	0,08	T	T	3,85	3,40E-09	1,21E-06	T	NM_001308176; NM_001792; ENST00000269141; ENST00000399380; ENST00000413878; ENST00000418492; ENST00000430882; BC036470; OTTHUMT00000133246; OTTHUMT00000139289; OTTHUMT00000139363; OTTHUMT00000314046; OTTHUMT00000314047	CDH2	cadherin 2, type 1, N-cadherin (neuronal)	Multiple_Complex
TC0700010321.hg.1	10,25	12,06	0,09	0,06	T	T	-3,5	4,00E-09	1,41E-06	T	NM_001163147; NM_001163148; NM_001163149; NM_001163150; NM_001163151; NM_001163152; NM_004956; NR_120445; ENST00000242066; ENST00000399357; ENST00000403527; ENST00000403685; ENST00000405192; ENST00000405218; ENST00000405358; ENST00000420159; ENST00000421381; ENST00000430479; ENST00000431887; ENST00000433547; ENST00000438956; ENST00000443137; ENST00000443608; ENST00000460438; ENST00000472931; ENST…	ETV1	ets variant 1	Multiple_Complex
TC0300011628.hg.1	11,66	9,21	0,17	0,22	T	T	5,46	4,77E-09	1,60E-06	T	NM_001145845; NM_002941; NM_133631; ENST00000436010; ENST00000464233; ENST00000466906; ENST00000467549; ENST00000472273; ENST00000484514; ENST00000488735; ENST00000492990; ENST00000495273; ENST00000495961; ENST00000498428; ENST00000618833; ENST00000618846; BC112336; BC115020; BC115022; BC157861; BC171855; OTTHUMT00000352610; OTTHUMT00000352611; OTTHUMT00000352612; OTTHUMT00000352613; OTTHUMT00000…	ROBO1	roundabout guidance receptor 1	Multiple_Complex
TC0400007848.hg.1	8,23	10,03	0,08	0,09	T	T	-3,49	4,71E-09	1,60E-06	T	NM_001144978; ENST00000325278; ENST00000359107; ENST00000395759; ENST00000423607; ENST00000429335; ENST00000429519; ENST00000433372; ENST00000461101; ENST00000461856; ENST00000465255; ENST00000475291; ENST00000484725; ENST00000490128; ENST00000490698; ENST00000492183; OTTHUMT00000347552; OTTHUMT00000347553; OTTHUMT00000347554; OTTHUMT00000347555; OTTHUMT00000347556; OTTHUMT00000347557; OTTHUMT000…	MTHFD2L	methylenetetrahydrofolate dehydrogenase (NADP+ dependent) 2-like	Multiple_Complex
TC0400012696.hg.1	9,88	7,77	0,21	0,12	T	T	4,32	4,71E-09	1,60E-06	T	NM_001303419; NM_173553; ENST00000326754; ENST00000394461; ENST00000502707; ENST00000503141; ENST00000503475; ENST00000511771; ENST00000512729; BC111959; BC111961; BC143709; OTTHUMT00000359733; OTTHUMT00000359734; OTTHUMT00000359735; OTTHUMT00000359736; OTTHUMT00000359737; OTTHUMT00000359738; OTTHUMT00000359739	TRIML2	tripartite motif family like 2	Multiple_Complex
TC0200015645.hg.1	8,39	10,11	0,04	0,06	T	T	-3,31	5,23E-09	1,73E-06	T	NM_015657; NM_173076; NR_103740; ENST00000272895; ENST00000389661; ENST00000412081; OTTHUMT00000337109; OTTHUMT00000337110; OTTHUMT00000337111; uc002vew.3	ABCA12	ATP binding cassette subfamily A member 12	Multiple_Complex
TC2000006501.hg.1	6,66	8,99	0,24	0,19	T	T	-5,03	5,43E-09	1,76E-06	T	NM_001040022; NM_001040023; NM_080792; ENST00000356025; ENST00000358771; ENST00000400068; ENST00000622179; BC026692; BC033092; BC038510; BC075849; OTTHUMT00000077568; OTTHUMT00000251762; OTTHUMT00000251763; uc002wfq.3	SIRPA	signal-regulatory protein alpha	Coding
TC1900007754.hg.1	10,56	8,9	0,07	0,05	T	T	3,15	5,54E-09	1,77E-06	T	NM_001105570; ENST00000397061; OTTHUMT00000450338; uc010edf.3	NUDT19	nudix hydrolase 19	Multiple_Complex
TC0500013336.hg.1	13,55	11,56	0,11	0,08	T	T	3,97	6,12E-09	1,93E-06	T	NM_001256732; NM_001256733; NM_001256734; NM_001256735; NM_001256736; NM_012446; ENST00000504136; ENST00000504174; ENST00000504985; ENST00000505980; ENST00000506960; ENST00000507472; ENST00000507655; ENST00000507968; ENST00000508912; ENST00000509013; ENST00000509053; ENST00000509743; ENST00000510060; ENST00000512098; ENST00000512923; ENST00000513785; ENST00000514493; ENST00000515395; ENST00000615…	SSBP2	single-stranded DNA binding protein 2	Multiple_Complex
TC0X00010557.hg.1	5	9,15	0,53	0,25	F	T	-17,78	6,66E-09	2,02E-06	F	NM_000640; ENST00000243213; ENST00000371936; ENST00000468224; BC020739; BC033705; OTTHUMT00000057966; OTTHUMT00000057967	IL13RA2	interleukin 13 receptor, alpha 2	Multiple_Complex
TC0400011279.hg.1	8,93	6,12	0,12	0,42	T	T	7,03	6,73E-09	2,02E-06	T	NM_001257386; NM_004827; ENST00000237612; ENST00000503830; ENST00000505480; ENST00000515655; BC021281; BC092408; OTTHUMT00000253051; OTTHUMT00000363319; OTTHUMT00000363320; OTTHUMT00000363321; uc003hrh.3	ABCG2	ATP binding cassette subfamily G member 2 (Junior blood group)	Multiple_Complex
TC0800011211.hg.1	8,38	6,39	0,08	0,06	T	T	3,97	6,77E-09	2,02E-06	T	NM_024759; ENST00000341166; ENST00000430223; ENST00000519324; ENST00000520545; ENST00000520735; ENST00000521820; ENST00000521949; ENST00000522188; BC132687; BC144055; OTTHUMT00000379677; OTTHUMT00000379678; OTTHUMT00000379679; OTTHUMT00000379680; OTTHUMT00000379681; OTTHUMT00000379682; OTTHUMT00000379683; OTTHUMT00000379684	NIPAL2	NIPA-like domain containing 2	Multiple_Complex
TC0X00010990.hg.1	11,83	9,05	0,05	0,34	T	T	6,89	6,78E-09	2,02E-06	T	NM_022661; ENST00000358993; BC005382; BC062672; OTTHUMT00000058590	SPANXC; SPANXD	SPANX family, member C; SPANX family, member D	Coding
TC0500007761.hg.1	6,13	8,99	0,19	0,15	T	T	-7,26	7,26E-09	2,13E-06	T	NM_001161342; NM_173490; ENST00000287773; ENST00000454765; BC018083; BC035310; OTTHUMT00000254037; OTTHUMT00000369000	TMEM171	transmembrane protein 171	Coding
TC2100006784.hg.1	9,05	6,91	0,03	0,24	T	T	4,39	7,34E-09	2,13E-06	T	NM_001270407; NM_001270408; NM_021219; NR_072999; ENST00000312957; ENST00000400532; ENST00000460679; ENST00000471689; ENST00000477351; ENST00000480456; ENST00000492962; BC017779; OTTHUMT00000171347; OTTHUMT00000171349; OTTHUMT00000171352; OTTHUMT00000171353; OTTHUMT00000171354; OTTHUMT00000171355	JAM2	junctional adhesion molecule 2	Multiple_Complex
TC0100011064.hg.1	12,34	10,22	0,03	0,07	T	T	4,35	8,27E-09	2,36E-06	T	NM_000186; NM_001014975; ENST00000359637; ENST00000367429; ENST00000466229; ENST00000470918; ENST00000496761; ENST00000630130; BC142699; OTTHUMT00000086412; OTTHUMT00000087502; OTTHUMT00000087503; OTTHUMT00000088705; OTTHUMT00000317692; OTTHUMT00000484313; uc001gtj.4	CFH	complement factor H	Multiple_Complex
TC1100013084.hg.1	9,66	11,41	0,11	0,08	T	T	-3,36	8,91E-09	2,52E-06	T	NM_001301007; NM_130847; ENST00000317829; ENST00000433060; ENST00000537191; ENST00000539727; BC037539; OTTHUMT00000396474; OTTHUMT00000397834; OTTHUMT00000397837; OTTHUMT00000397843	AMOTL1	angiomotin like 1	Multiple_Complex
TC0600014337.hg.1	12,84	11,19	0,06	0,09	T	T	3,14	9,22E-09	2,57E-06	T	NM_001017408; NM_020399; ENST00000052569; ENST00000368498; ENST00000535237; BC009553; OTTHUMT00000041987; OTTHUMT00000041988	GOPC	golgi-associated PDZ and coiled-coil motif containing	Multiple_Complex
TC0100014543.hg.1	10,94	12,64	0,12	0,08	T	T	-3,25	9,75E-09	2,67E-06	T	NM_001114120; NM_017779; ENST00000370966; ENST00000456315; ENST00000488146; ENST00000489862; ENST00000525124; BC065304; OTTHUMT00000025513; OTTHUMT00000025514; OTTHUMT00000025515; OTTHUMT00000025516; OTTHUMT00000025517	DEPDC1	DEP domain containing 1	Multiple_Complex
TC0200014362.hg.1	10,96	8,8	0,11	0,13	T	T	4,47	9,85E-09	2,67E-06	T	NM_207363; NM_207481; ENST00000317721; ENST00000358991; ENST00000405974; ENST00000409213; ENST00000409261; ENST00000427594; ENST00000473859; OTTHUMT00000331663; OTTHUMT00000331993; OTTHUMT00000331994; OTTHUMT00000331995; OTTHUMT00000331996; uc002ttp.3	NCKAP5	NCK-associated protein 5	Multiple_Complex
TC0400012874.hg.1	7,85	5,68	0,12	0,2	T	T	4,51	1,08E-08	2,86E-06	T	NM_207352; ENST00000378802; ENST00000502665; ENST00000507209; ENST00000513354; BC060857; OTTHUMT00000360398; OTTHUMT00000360399; OTTHUMT00000360400; OTTHUMT00000360401	CYP4V2	cytochrome P450, family 4, subfamily V, polypeptide 2	Multiple_Complex
TC0600008146.hg.1	12,45	10,03	0,04	0,15	T	T	5,37	1,08E-08	2,86E-06	T	NM_001015051; NM_001024630; NM_001278478; NR_103532; NR_103533; ENST00000359524; ENST00000371432; ENST00000371436; ENST00000371438; ENST00000465038; ENST00000473041; ENST00000478660; ENST00000483243; ENST00000483377; ENST00000576263; ENST00000625924; OTTHUMT00000040753; OTTHUMT00000040754; OTTHUMT00000040755; OTTHUMT00000040756; OTTHUMT00000040757; OTTHUMT00000040758; OTTHUMT00000040759; OTTHUMT0…	RUNX2	runt-related transcription factor 2	Multiple_Complex
TC1700008757.hg.1	10,32	7,39	0,1	0,31	T	T	7,63	1,10E-08	2,88E-06	T	NM_002758; ENST00000359094; ENST00000586641; ENST00000588110; ENST00000589295; ENST00000589647; ENST00000590474; ENST00000591445; ENST00000592348; ENST00000613873; BC012009; OTTHUMT00000450689; OTTHUMT00000450690; OTTHUMT00000450691; OTTHUMT00000450692; OTTHUMT00000450693; OTTHUMT00000450694; OTTHUMT00000450695; OTTHUMT00000450696	MAP2K6	mitogen-activated protein kinase kinase 6	Multiple_Complex
TC0700010604.hg.1	7,52	5,48	0,17	0,16	T	F	4,1	1,12E-08	2,90E-06	F	NM_019029; NM_031311; ENST00000265394; ENST00000396276; ENST00000409850; ENST00000432534; ENST00000437527; ENST00000447426; ENST00000448959; ENST00000449801; ENST00000455544; ENST00000455893; ENST00000458405; ENST00000488891; ENST00000612187; ENST00000614864; BC016838; OTTHUMT00000214214; OTTHUMT00000214215; OTTHUMT00000328117; OTTHUMT00000328118; OTTHUMT00000328119; OTTHUMT00000328120; OTTHUMT00…	CPVL	carboxypeptidase, vitellogenic-like	Multiple_Complex
TC0100014910.hg.1	9,41	11,76	0,21	0,12	T	T	-5,11	1,22E-08	3,08E-06	T	NM_001195683; NM_001195684; NM_003243; NR_036634; ENST00000212355; ENST00000370399; ENST00000417833; ENST00000465892; ENST00000468996; ENST00000470600; ENST00000525962; ENST00000529608; ENST00000532540; ENST00000533089; ENST00000533370; BC126116; BC136295; OTTHUMT00000027926; OTTHUMT00000027973; OTTHUMT00000027974; OTTHUMT00000027975; OTTHUMT00000027976; OTTHUMT00000382307; OTTHUMT00000382308; OT…	TGFBR3	transforming growth factor beta receptor III	Multiple_Complex
TC1100010003.hg.1	12,25	10,33	0,18	0,04	T	T	3,78	1,24E-08	3,08E-06	T	NM_001302826; NM_001302827; NM_016229; NR_126508; ENST00000299498; ENST00000436351; ENST00000524608; ENST00000524790; ENST00000525307; ENST00000526084; ENST00000527542; ENST00000528585; ENST00000531096; ENST00000532621; ENST00000532920; ENST00000533558; ENST00000534443; ENST00000534698; BC001346; OTTHUMT00000385676; OTTHUMT00000385677; OTTHUMT00000385678; OTTHUMT00000385679; OTTHUMT00000385680; O…	CYB5R2	cytochrome b5 reductase 2	Multiple_Complex
TC1600008301.hg.1	8,7	10,61	0,23	0,05	T	T	-3,75	1,22E-08	3,08E-06	T	NM_001740; NM_007088; NR_027910; ENST00000302628; ENST00000349553; ENST00000467817; ENST00000490520; ENST00000562305; BC015484; OTTHUMT00000268988; OTTHUMT00000357353; OTTHUMT00000357354; OTTHUMT00000433790	CALB2	calbindin 2	Multiple_Complex
TC0600012536.hg.1	10,88	12,71	0,14	0,03	T	T	-3,55	1,33E-08	3,27E-06	T	NM_080743; ENST00000452027; ENST00000475068; ENST00000488604; ENST00000517387; ENST00000524221; BC021715; OTTHUMT00000041474; OTTHUMT00000041475; OTTHUMT00000041476; OTTHUMT00000376450; OTTHUMT00000376451	SRSF12	serine/arginine-rich splicing factor 12	Multiple_Complex
TC1300009781.hg.1	11,24	8,43	0,27	0,14	T	T	7,03	1,34E-08	3,27E-06	T	NM_001303110; NM_001845; ENST00000375820; ENST00000467182; ENST00000474391; ENST00000543140; ENST00000615732; BC151220; OTTHUMT00000045759; OTTHUMT00000312866; OTTHUMT00000312867; OTTHUMT00000476753; OTTHUMT00000476754; uc001vqw.4	COL4A1	collagen, type IV, alpha 1	Multiple_Complex
TC1300009674.hg.1	9,96	11,76	0,18	0,07	T	T	-3,49	1,44E-08	3,48E-06	T	NM_024089; ENST00000376004; ENST00000460338; ENST00000484943; ENST00000486540; BC001297; OTTHUMT00000045698; OTTHUMT00000045699; OTTHUMT00000045700; OTTHUMT00000045701	KDELC1	KDEL (Lys-Asp-Glu-Leu) containing 1	Multiple_Complex
TC0300010913.hg.1	10	8,29	0,12	0,11	T	T	3,28	1,56E-08	3,71E-06	T	NM_022842; NM_178181; ENST00000296129; ENST00000425231; ENST00000490471; OTTHUMT00000256748; OTTHUMT00000343581; OTTHUMT00000343582	CDCP1	CUB domain containing protein 1	Multiple_Complex
TC1000006701.hg.1	10,77	8,31	0,1	0,26	T	T	5,48	1,64E-08	3,86E-06	T	NM_002216; ENST00000358415; ENST00000379587; ENST00000429820; ENST00000473227; ENST00000477751; ENST00000480387; ENST00000613369; BC132685; OTTHUMT00000046678; OTTHUMT00000046679; OTTHUMT00000046681; OTTHUMT00000046682; OTTHUMT00000317713; OTTHUMT00000317714	ITIH2	inter-alpha-trypsin inhibitor heavy chain 2	Multiple_Complex
TC0600007585.hg.1	11,87	13,68	0,15	0,08	T	T	-3,5	1,66E-08	3,86E-06	T	NM_001289161; ENST00000252229; ENST00000399150; ENST00000494577; ENST00000538442; BC044218; OTTHUMT00000076102; OTTHUMT00000258151; OTTHUMT00000258152	MICB	MHC class I polypeptide-related sequence B	Multiple_Complex
TC1100008257.hg.1	8,16	5,46	0,19	0,21	T	F	6,46	1,69E-08	3,91E-06	F	NM_018043; NR_030691; ENST00000316296; ENST00000355303; ENST00000525494; ENST00000529636; ENST00000529913; ENST00000530480; ENST00000530676; ENST00000531300; ENST00000531349; ENST00000531604; BC033036; OTTHUMT00000393685; OTTHUMT00000393686; OTTHUMT00000393687; OTTHUMT00000393688; OTTHUMT00000393689; OTTHUMT00000393690; OTTHUMT00000393691; OTTHUMT00000393720; OTTHUMT00000393721; OTTHUMT0000039372…	ANO1	anoctamin 1, calcium activated chloride channel	Multiple_Complex
TC0X00007655.hg.1	14,79	13,1	0,04	0,16	T	T	3,22	1,80E-08	4,10E-06	T	NM_006517; ENST00000587091; ENST00000590447; OTTHUMT00000057266; OTTHUMT00000450056	SLC16A2	solute carrier family 16, member 2 (thyroid hormone transporter)	Multiple_Complex
TC1900009443.hg.1	14,39	12,68	0,06	0,18	T	T	3,27	1,88E-08	4,24E-06	T	NM_000064; ENST00000245907; ENST00000594005; ENST00000594270; ENST00000594936; ENST00000595577; ENST00000596179; ENST00000596238; ENST00000596548; ENST00000597442; ENST00000598805; ENST00000599668; ENST00000599899; ENST00000600744; ENST00000600763; ENST00000601008; ENST00000601475; ENST00000602053; ENST00000602229; BC150179; BC150200; OTTHUMT00000317636; OTTHUMT00000317637; OTTHUMT00000317638; OT…	C3	complement component 3	Multiple_Complex
TC0600006873.hg.1	6,81	8,58	0,23	0,1	T	T	-3,4	1,94E-08	4,33E-06	T	NM_001718; ENST00000283147; OTTHUMT00000039794	BMP6	bone morphogenetic protein 6	Multiple_Complex
TC1100007216.hg.1	8,52	7	0,09	0,09	T	T	2,86	1,96E-08	4,34E-06	T	NM_024081; ENST00000257836; BC010052; BC063393; OTTHUMT00000388446	PRRG4	proline rich Gla (G-carboxyglutamic acid) 4 (transmembrane)	Multiple_Complex
TC1900010334.hg.1	6,76	4,25	0,2	0,28	T	F	5,7	2,04E-08	4,47E-06	F	NM_020856; ENST00000240587; ENST00000558569; ENST00000560707; BC127095; BC127096; OTTHUMT00000316743; OTTHUMT00000419025; OTTHUMT00000419026	TSHZ3	teashirt zinc finger homeobox 3	Multiple_Complex
TC0700011953.hg.1	9,11	11,69	0,27	0,18	T	T	-5,96	2,11E-08	4,57E-06	T	NM_000777; NM_001190484; NM_001291829; NM_001291830; NR_033807; ENST00000222982; ENST00000339843; ENST00000439761; ENST00000456417; ENST00000461920; ENST00000463364; ENST00000463907; ENST00000466061; ENST00000469622; ENST00000469887; ENST00000473347; ENST00000480723; ENST00000481825; ENST00000488187; ENST00000489231; BC033862	CYP3A5	cytochrome P450, family 3, subfamily A, polypeptide 5	Multiple_Complex
TC0200014775.hg.1	9,99	11,72	0,15	0,15	T	T	-3,31	2,22E-08	4,72E-06	T	NM_033272; NM_173162; ENST00000328032; ENST00000332142; ENST00000477019; ENST00000618399; ENST00000621889; BC035815; OTTHUMT00000255093; OTTHUMT00000255094; OTTHUMT00000333199	KCNH7	potassium channel, voltage gated eag related subfamily H, member 7	Multiple_Complex
TC0600013228.hg.1	10,04	7,98	0,05	0,26	T	T	4,17	2,22E-08	4,72E-06	T	NM_145176; ENST00000275230; BC070149; OTTHUMT00000042302	SLC2A12	solute carrier family 2 (facilitated glucose transporter), member 12	Multiple_Complex
TC0400008450.hg.1	10,37	8,51	0,13	0,2	T	T	3,63	2,32E-08	4,87E-06	T	NM_001127493; NM_001148; NM_020977; ENST00000264366; ENST00000357077; ENST00000394537; ENST00000502701; ENST00000503271; ENST00000503423; ENST00000504415; ENST00000504454; ENST00000504887; ENST00000505342; ENST00000506344; ENST00000506722; ENST00000508007; ENST00000508613; ENST00000509550; ENST00000510275; ENST00000511380; ENST00000512298; ENST00000512999; ENST00000514160; ENST00000514167; ENST00…	ANK2	ankyrin 2, neuronal	Multiple_Complex
TC1500009508.hg.1	10,63	13,09	0,06	0,32	T	T	-5,52	2,35E-08	4,89E-06	T	NM_001284338; NM_001284339; NM_001284340; NM_006154; NM_198400; NR_104302; ENST00000338963; ENST00000435532; ENST00000502612; ENST00000503468; ENST00000506154; ENST00000507063; ENST00000508075; ENST00000508342; ENST00000508871; ENST00000513957; ENST00000514893; ENST00000557845; BC136605; BC144284; BC144285; BC152452; BC152562; OTTHUMT00000255016; OTTHUMT00000359817; OTTHUMT00000359818; OTTHUMT000…	NEDD4	neural precursor cell expressed, developmentally down-regulated 4, E3 ubiquitin protein ligase	Multiple_Complex
TC2100007821.hg.1	8,3	6,82	0,05	0,1	T	T	2,78	2,38E-08	4,90E-06	T	NM_006988; ENST00000284984; ENST00000451462; ENST00000464589; ENST00000492656; ENST00000517452; ENST00000517777; BC036515; OTTHUMT00000171650; OTTHUMT00000171651; OTTHUMT00000171652; OTTHUMT00000171653; OTTHUMT00000381380; OTTHUMT00000381381	ADAMTS1	ADAM metallopeptidase with thrombospondin type 1 motif 1	Multiple_Complex
TC0100014769.hg.1	9,92	8,27	0,11	0,19	T	T	3,15	2,44E-08	4,98E-06	T	NM_001253693; NM_018298; ENST00000341115; ENST00000370587; ENST00000370589; ENST00000474447; ENST00000475312; ENST00000490600; BC060765; OTTHUMT00000027569; OTTHUMT00000027570; OTTHUMT00000027571; OTTHUMT00000027572; OTTHUMT00000027573; OTTHUMT00000092677	MCOLN3	mucolipin 3	Multiple_Complex
TC0700006913.hg.1	9,81	7,36	0,2	0,2	T	T	5,47	2,47E-08	5,00E-06	T	NM_001005340; NM_002510; ENST00000258733; ENST00000381990; ENST00000409458; ENST00000459927; ENST00000463011; ENST00000465673; ENST00000468723; ENST00000470994; ENST00000474157; ENST00000478451; ENST00000479625; ENST00000487890; ENST00000492512; ENST00000492858; BC032783; OTTHUMT00000214004; OTTHUMT00000327152; OTTHUMT00000327153; OTTHUMT00000327154; OTTHUMT00000327155; OTTHUMT00000327156; OTTHUM…	GPNMB	glycoprotein (transmembrane) nmb	Multiple_Complex
TC1200010559.hg.1	10,79	9,08	0,04	0,13	T	T	3,28	2,51E-08	5,04E-06	T	NM_000376; NM_001017535; NM_001017536; ENST00000229022; ENST00000395324; ENST00000546653; ENST00000547065; ENST00000548664; ENST00000549336; ENST00000550314; ENST00000550325; BC060832	VDR	vitamin D (1,25- dihydroxyvitamin D3) receptor	Multiple_Complex
TC0600012132.hg.1	11,63	9,96	0,15	0,08	T	T	3,19	2,65E-08	5,26E-06	T	NM_001278666; NM_001278667; NM_001278668; NM_016277; NM_183227; NR_103822; ENST00000317483; ENST00000468148; BC015021; OTTHUMT00000041042	RAB23	RAB23, member RAS oncogene family	Multiple_Complex
TC0500013089.hg.1	9,2	7,07	0,14	0,2	T	T	4,37	2,81E-08	5,53E-06	T	NM_005110; ENST00000253778; ENST00000503228; ENST00000503546; ENST00000510122; ENST00000518158; ENST00000518185; ENST00000518906; ENST00000520165; BC000012; OTTHUMT00000373444; OTTHUMT00000373752; OTTHUMT00000373753; OTTHUMT00000373754; OTTHUMT00000373908; OTTHUMT00000373909; OTTHUMT00000373910; OTTHUMT00000373911	GFPT2	glutamine-fructose-6-phosphate transaminase 2	Multiple_Complex
TC0100013072.hg.1	9,28	7,52	0,06	0,11	T	T	3,39	3,06E-08	5,94E-06	T	NM_001141973; NM_001141974; NM_022089; ENST00000326735; ENST00000341676; ENST00000452699; ENST00000463860; ENST00000466561; ENST00000502418; ENST00000502860; ENST00000503552; ENST00000506174; ENST00000508222; ENST00000509392; ENST00000509619; ENST00000510069; ENST00000511957; ENST00000617114; BC030267; OTTHUMT00000006617; OTTHUMT00000006618; OTTHUMT00000006619; OTTHUMT00000006620; OTTHUMT00000368…	ATP13A2	ATPase type 13A2	Multiple_Complex
TC1400007466.hg.1	13,24	11,86	0,03	0,05	T	T	2,59	3,08E-08	5,94E-06	T	NM_004480; NM_178155; NM_178156; NR_038167; NR_038170; ENST00000342677; ENST00000358307; ENST00000360689; ENST00000394586; ENST00000549235; ENST00000553924; ENST00000554610; ENST00000554667; ENST00000554765; ENST00000555559; ENST00000556292; ENST00000556518; ENST00000557164; ENST00000557338; ENST00000557536; BC142958; OTTHUMT00000286406; OTTHUMT00000286407; OTTHUMT00000412044; OTTHUMT00000412045;…	FUT8	fucosyltransferase 8 (alpha (1,6) fucosyltransferase)	Multiple_Complex
TC0400007853.hg.1	10,91	12,6	0,09	0,04	T	T	-3,23	3,27E-08	6,26E-06	T	NM_001432; ENST00000244869; ENST00000503689; ENST00000507603; BC136404; BC136405; OTTHUMT00000252276; OTTHUMT00000362718; OTTHUMT00000362719	EREG	epiregulin	Multiple_Complex
TC2000006674.hg.1	9,96	7,87	0,18	0,17	T	T	4,27	3,38E-08	6,42E-06	T	NM_000933; NM_001172646; NM_182797; ENST00000278655; ENST00000378473; ENST00000378493; ENST00000378501; ENST00000407043; ENST00000414679; ENST00000416836; ENST00000437503; ENST00000441846; ENST00000464199; ENST00000473151; ENST00000482123; ENST00000492632; BC117458; BC143868; OTTHUMT00000077948; OTTHUMT00000077949; OTTHUMT00000077950; OTTHUMT00000077951; OTTHUMT00000077952; OTTHUMT00000077954; OT…	PLCB4	phospholipase C, beta 4	Multiple_Complex
TC1200012752.hg.1	5,6	8,44	0,41	0,1	T	T	-7,16	3,42E-08	6,44E-06	T	NM_002261; NM_007333; ENST00000381903; ENST00000396439; OTTHUMT00000393471; OTTHUMT00000393474	KLRC3	killer cell lectin-like receptor subfamily C, member 3	Coding
TC1200009892.hg.1	13,34	11,38	0,07	0,06	T	T	3,86	3,76E-08	6,88E-06	T	NM_001172632; NM_001172633; NM_002543; ENST00000309539; ENST00000339968; ENST00000432556; ENST00000536989; ENST00000538745; ENST00000538873; ENST00000539518; ENST00000543414; ENST00000543993; ENST00000544577; ENST00000545927; BC022295; OTTHUMT00000400091; OTTHUMT00000400092; OTTHUMT00000400094; OTTHUMT00000400095; OTTHUMT00000400096; OTTHUMT00000400097; OTTHUMT00000400100; OTTHUMT00000400101; OTT…	OLR1	oxidized low density lipoprotein (lectin-like) receptor 1	Multiple_Complex
TC1500006806.hg.1	6,99	5,02	0,25	0,08	T	F	3,91	3,71E-08	6,88E-06	F	NM_001036; NM_001243996; ENST00000389232; ENST00000415757; ENST00000557931; ENST00000558060; ENST00000559333; ENST00000559917; ENST00000560791; ENST00000622037; OTTHUMT00000417514; OTTHUMT00000417950; OTTHUMT00000417951; OTTHUMT00000417952; OTTHUMT00000417953; OTTHUMT00000417954; OTTHUMT00000417955; uc001zhi.3	RYR3	ryanodine receptor 3	Multiple_Complex
TC1700009850.hg.1	12,97	11,24	0,13	0,11	T	T	3,33	3,73E-08	6,88E-06	T	NM_000304; NM_001281455; NM_001281456; NM_153321; NM_153322; NR_104017; NR_104018; ENST00000312280; ENST00000395936; ENST00000395938; ENST00000426385; ENST00000471150; ENST00000494511; ENST00000580497; ENST00000580584; ENST00000612492; BC019040; BC091499; OTTHUMT00000130378; OTTHUMT00000130379; OTTHUMT00000130380; OTTHUMT00000130683; OTTHUMT00000130684; OTTHUMT00000442213; OTTHUMT00000442214; OTT…	PMP22	peripheral myelin protein 22	Multiple_Complex
TC0400010453.hg.1	8,86	10,3	0,13	0,02	T	T	-2,72	3,87E-08	7,04E-06	T	NM_001303228; NM_024943; ENST00000344606; ENST00000372489; ENST00000381938; ENST00000495029; BC030803; OTTHUMT00000250435; OTTHUMT00000317570; OTTHUMT00000360606; OTTHUMT00000360607	TMEM156	transmembrane protein 156	Multiple_Complex
TC0100013339.hg.1	10,98	7,65	0,42	0,14	T	T	10,02	4,12E-08	7,43E-06	T	NM_001031680; NM_004350; ENST00000308873; ENST00000338888; ENST00000399916; ENST00000479341; ENST00000496967; BC013362; OTTHUMT00000009284; OTTHUMT00000009285; OTTHUMT00000009286; OTTHUMT00000009287; uc001bjr.3	RUNX3	runt-related transcription factor 3	Multiple_Complex
TC0200007200.hg.1	12,23	10,61	0,05	0,2	T	T	3,07	4,61E-08	8,09E-06	T	NM_000627; NM_001166264; NM_001166265; NM_001166266; NM_206943; ENST00000402934; ENST00000404525; ENST00000404816; ENST00000407925; ENST00000413303; ENST00000415140; ENST00000418533; ENST00000422669; ENST00000432635; ENST00000468091; ENST00000489740; ENST00000498013; BC130289; BC144128; OTTHUMT00000325298; OTTHUMT00000325334; OTTHUMT00000325337; OTTHUMT00000325420; OTTHUMT00000325421; OTTHUMT0000…	LTBP1	latent transforming growth factor beta binding protein 1	Multiple_Complex
TC0400012181.hg.1	7,72	10,04	0,06	0,29	T	T	-4,97	4,67E-08	8,09E-06	T	NM_000508; NM_021871; ENST00000302053; ENST00000403106; ENST00000622532; BC098280; BC099706; BC099720; BC101935; OTTHUMT00000317592; OTTHUMT00000317593	FGA	fibrinogen alpha chain	Multiple_Complex
TC0700008190.hg.1	9,49	6,98	0,23	0,37	T	T	5,69	4,56E-08	8,09E-06	T	NM_000072; NM_001001547; NM_001001548; NM_001127443; NM_001127444; NM_001289908; NM_001289909; NM_001289911; NR_110501; ENST00000309881; ENST00000394788; ENST00000413265; ENST00000419819; ENST00000426978; ENST00000428497; ENST00000432207; ENST00000433696; ENST00000435819; ENST00000436384; ENST00000438020; ENST00000441034; ENST00000441109; ENST00000447544; ENST00000464213; ENST00000478292; ENST000…	CD36	CD36 molecule (thrombospondin receptor)	Multiple_Complex
TC0X00010459.hg.1	11,55	13,17	0,15	0,06	T	T	-3,07	4,61E-08	8,09E-06	T	NM_001085354; NM_024657; ENST00000255495; ENST00000355610; ENST00000478924; ENST00000604604; OTTHUMT00000057816; OTTHUMT00000057817; OTTHUMT00000378619; OTTHUMT00000469675; uc004emu.4	MORC4	MORC family CW-type zinc finger 4	Multiple_Complex
TC1400010651.hg.1	8,63	6,82	0,08	0,15	T	T	3,48	4,68E-08	8,09E-06	T	NM_003836; ENST00000331224; ENST00000392848; ENST00000555747; ENST00000556051; BC007741; BC013197; BC014015; OTTHUMT00000414388; OTTHUMT00000414390; OTTHUMT00000414393; OTTHUMT00000414394	DLK1	delta-like 1 homolog (Drosophila)	Multiple_Complex
TC0100010244.hg.1	14,17	12,63	0,09	0,01	T	T	2,9	4,83E-08	8,23E-06	T	NM_001206567; NM_005531; ENST00000295809; ENST00000340979; ENST00000359709; ENST00000368131; ENST00000368132; ENST00000426592; ENST00000447473; ENST00000448393; ENST00000474473; ENST00000483916; ENST00000493884; ENST00000562225; ENST00000566111; ENST00000567661; BC017059; OTTHUMT00000090101; OTTHUMT00000090102; OTTHUMT00000090104; OTTHUMT00000090105; OTTHUMT00000090106; OTTHUMT00000090107; OTTHUM…	IFI16	interferon, gamma-inducible protein 16	Multiple_Complex
TC0200010164.hg.1	8,95	10,89	0,19	0,17	T	T	-3,83	4,80E-08	8,23E-06	T	NM_001130445; NM_001287503; NM_001287504; NM_001287505; NM_006751; NR_109843; ENST00000320370; ENST00000409001; ENST00000409136; ENST00000416081; ENST00000431877; ENST00000440623; ENST00000451836; ENST00000454579; ENST00000467172; ENST00000470129; ENST00000470654; ENST00000480753; ENST00000491720; ENST00000491866; ENST00000495248; BC028706; BC052581; BC064499; OTTHUMT00000255793; OTTHUMT000002557…	SSFA2	sperm specific antigen 2	Multiple_Complex
TC1600010732.hg.1	11,95	13,5	0,09	0,04	T	T	-2,94	5,24E-08	8,85E-06	T	NM_000903; NM_001025433; NM_001025434; NM_001286137; ENST00000320623; ENST00000379046; ENST00000379047; ENST00000439109; ENST00000561500; ENST00000564043; ENST00000569118; BC007659; OTTHUMT00000268956; OTTHUMT00000268957; OTTHUMT00000433980; OTTHUMT00000433981; OTTHUMT00000433982; OTTHUMT00000433983; OTTHUMT00000433984	NQO1	NAD(P)H dehydrogenase, quinone 1	Multiple_Complex
TC0X00011413.hg.1	9,29	6,76	0,1	0,43	T	T	5,77	5,49E-08	9,20E-06	T	NM_000425; NM_001143963; NM_001278116; NM_024003; ENST00000361699; ENST00000361981; ENST00000370055; ENST00000370058; ENST00000370060; ENST00000407935; ENST00000420165; ENST00000439496; ENST00000455590; ENST00000458029; ENST00000460553; ENST00000474853; ENST00000484652; ENST00000491983; ENST00000496122; ENST00000616195; BC126229; BC136447; OTTHUMT00000061094; OTTHUMT00000061095; OTTHUMT0000006109…	L1CAM	L1 cell adhesion molecule	Multiple_Complex
TC0100017420.hg.1	11,32	9,24	0,11	0,25	T	T	4,23	5,57E-08	9,26E-06	T	NM_007207; NR_111939; NR_111940; ENST00000366899; ENST00000468085; ENST00000477026; ENST00000494642; BC031405; BC063826; OTTHUMT00000090716; OTTHUMT00000090717; OTTHUMT00000090718; OTTHUMT00000090719	DUSP10	dual specificity phosphatase 10	Multiple_Complex
TC0400008106.hg.1	8,71	6,99	0,24	0,11	T	T	3,31	6,02E-08	9,87E-06	T	NM_016323; ENST00000264350; ENST00000502913; ENST00000508159; ENST00000508695; ENST00000510223; BC140716; OTTHUMT00000253554; OTTHUMT00000363268; OTTHUMT00000363269; OTTHUMT00000363270; OTTHUMT00000363331	HERC5	HECT and RLD domain containing E3 ubiquitin protein ligase 5	Multiple_Complex
TC1200007051.hg.1	9,46	11,12	0,18	0,01	T	T	-3,16	6,07E-08	9,87E-06	T	NM_024854; ENST00000240651; ENST00000375266; ENST00000536851; ENST00000538072; ENST00000538582; ENST00000538615; ENST00000543476; ENST00000544187; ENST00000544970; BC021662; OTTHUMT00000402360; OTTHUMT00000402361; OTTHUMT00000402363; OTTHUMT00000402364; OTTHUMT00000402365; OTTHUMT00000402366; OTTHUMT00000402367; OTTHUMT00000402368; OTTHUMT00000402369	PYROXD1	pyridine nucleotide-disulphide oxidoreductase domain 1	Multiple_Complex
TC1200008224.hg.1	15,82	14,43	0,05	0,02	T	T	2,62	6,07E-08	9,87E-06	T	NM_006851; ENST00000266659; ENST00000456650; ENST00000536703; ENST00000550491; BC012510; OTTHUMT00000405722; OTTHUMT00000405723; OTTHUMT00000405724; OTTHUMT00000405725	GLIPR1	GLI pathogenesis-related 1	Multiple_Complex
TC0500013247.hg.1	10,97	9,16	0,07	0,21	T	T	3,52	6,66E-08	1,07E-05	T	NM_018934; ENST00000239449; ENST00000624896; BC099728; OTTHUMT00000251814; OTTHUMT00000478918	PCDHB14	protocadherin beta 14	Coding
TC1100011643.hg.1	7,91	9,53	0,18	0,1	T	T	-3,07	7,08E-08	1,13E-05	T	NM_004041; NM_020251; ENST00000360025; ENST00000420843; ENST00000524400; ENST00000527385; ENST00000529280; ENST00000529741; ENST00000530086; ENST00000531012; ENST00000532447; ENST00000532525; ENST00000533255; ENST00000533609; BC003636; OTTHUMT00000384092; OTTHUMT00000384093; OTTHUMT00000384094; OTTHUMT00000384095; OTTHUMT00000384149; OTTHUMT00000384150; OTTHUMT00000384151; OTTHUMT00000384152; OTT…	ARRB1	arrestin, beta 1	Multiple_Complex
TC1400010644.hg.1	10,15	7,88	0,35	0,15	T	T	4,82	7,19E-08	1,14E-05	T	NM_001085; ENST00000393078; BC003559; BC010530; BC034554; OTTHUMT00000268080; OTTHUMT00000268081; OTTHUMT00000317773; OTTHUMT00000410739; OTTHUMT00000410740; OTTHUMT00000410741; OTTHUMT00000410742; OTTHUMT00000474419	SERPINA3	serpin peptidase inhibitor, clade A (alpha-1 antiproteinase, antitrypsin), member 3	Multiple_Complex
TC1200011495.hg.1	6,08	4,31	0,15	0,04	T	F	3,42	7,58E-08	1,19E-05	F	NM_002345; ENST00000266718; ENST00000546642; ENST00000548071; BC007038; BC035997; OTTHUMT00000407150; OTTHUMT00000407151; OTTHUMT00000407152	LUM	lumican	Multiple_Complex
TC1500007677.hg.1	6,55	8,54	0,34	0,12	T	T	-3,96	7,63E-08	1,19E-05	T	NM_001190456; NM_001190457; NM_006091; ENST00000261861; ENST00000540068; ENST00000543950; ENST00000566799; BC026335; OTTHUMT00000257068	CORO2B	coronin, actin binding protein, 2B	Multiple_Complex
TC1700012434.hg.1	9,36	7,63	0,26	0,07	T	T	3,3	7,91E-08	1,23E-05	T	NM_004502; ENST00000239165; ENST00000467314; ENST00000567101; BC015345; OTTHUMT00000358097; OTTHUMT00000358100; OTTHUMT00000471443	HOXB7	homeobox B7	Multiple_Complex
TC1200006909.hg.1	9,1	6,83	0,31	0,24	T	T	4,84	8,16E-08	1,26E-05	T	NM_001423; ENST00000256951; ENST00000396301; ENST00000431267; ENST00000535134; ENST00000536383; ENST00000537612; ENST00000538364; ENST00000541935; ENST00000542289; ENST00000542474; ENST00000544053; ENST00000546357; BC047300; OTTHUMT00000401019; OTTHUMT00000401020; OTTHUMT00000401021; OTTHUMT00000401022; OTTHUMT00000401024; OTTHUMT00000401025; OTTHUMT00000401064; OTTHUMT00000401065; OTTHUMT0000040…	EMP1	epithelial membrane protein 1	Multiple_Complex
TC0200015894.hg.1	8,38	6,9	0,13	0,17	T	T	2,79	8,48E-08	1,30E-05	T	DOCK10.rAug10-unspliced	DOCK10	Transcript Identified by AceView, Entrez Gene ID(s) 55619	Unassigned
TC1300008772.hg.1	10,18	8,81	0,07	0,12	T	T	2,59	8,82E-08	1,33E-05	T	NM_144974; ENST00000444614; ENST00000470137; ENST00000476570; ENST00000611737; ENST00000614023; BC137289; BC137290; BC144570; BC144571; OTTHUMT00000046005; OTTHUMT00000046006; OTTHUMT00000276172; OTTHUMT00000474861; OTTHUMT00000474862	CCDC122	coiled-coil domain containing 122	Multiple_Complex
TSUnmapped00000049.hg.1	10,85	12,54	0,16	0,04	T	T	-3,24	8,76E-08	1,33E-05	T	ENST00000625769	PADI3	peptidyl arginine deiminase, type III	Coding
TC2000008027.hg.1	12,12	13,47	0,09	0,08	T	T	-2,55	8,97E-08	1,35E-05	T	NM_002531; ENST00000370501; ENST00000482259; OTTHUMT00000080061; OTTHUMT00000080062; uc002ydf.3	NTSR1	neurotensin receptor 1 (high affinity)	Multiple_Complex
TC1200007461.hg.1	10,7	8,87	0,31	0,13	T	T	3,57	9,37E-08	1,40E-05	T	NM_001281429; NM_138371; ENST00000432328; ENST00000546455; ENST00000548348; ENST00000549500; ENST00000549630; ENST00000551777; BC008360; BC016154; OTTHUMT00000405079; OTTHUMT00000405080; OTTHUMT00000405082; OTTHUMT00000405083; OTTHUMT00000405084	PCED1B	PC-esterase domain containing 1B	Multiple_Complex
TC1000007072.hg.1	11,52	12,72	0,08	0,04	T	T	-2,31	9,53E-08	1,41E-05	T	NM_019043; ENST00000356785; ENST00000376236; ENST00000493857; BC054516; OTTHUMT00000047268; OTTHUMT00000047269; OTTHUMT00000047270	APBB1IP	amyloid beta (A4) precursor protein-binding, family B, member 1 interacting protein	Multiple_Complex
TC1700008218.hg.1	6,2	8,63	0,38	0,14	T	T	-5,39	9,98E-08	1,47E-05	T	NM_001242791; ENST00000376609.1; OTTHUMT00000366195; uc021tzt.2	FLJ45513; RP11-304F15.3	uncharacterized LOC729220; novel transcript antisense to TAC4	Multiple_Complex
TC0100012247.hg.1	8,22	6,57	0,21	0,18	T	T	3,13	1,01E-07	1,47E-05	T	NM_018012; ENST00000366518; ENST00000407071; ENST00000479506; ENST00000483253; OTTHUMT00000096658; OTTHUMT00000096660; OTTHUMT00000096661; OTTHUMT00000381037; uc001ibf.1	KIF26B	kinesin family member 26B	Multiple_Complex
TC0300011849.hg.1	13,31	11,54	0,2	0,14	T	T	3,42	1,03E-07	1,49E-05	T	NM_015429; ENST00000284322; ENST00000459682; ENST00000466947; ENST00000469764; ENST00000470336; ENST00000471714; ENST00000471901; ENST00000475896; ENST00000478235; ENST00000482765; ENST00000483129; ENST00000486770; ENST00000487012; ENST00000487249; ENST00000495063; ENST00000495591; ENST00000497021; ENST00000497395; ENST00000527258; ENST00000527943; ENST00000528305; ENST00000528490; ENST0000053023…	ABI3BP	ABI family, member 3 (NESH) binding protein	Multiple_Complex
TC0200011020.hg.1	9,65	10,92	0,06	0,03	T	T	-2,4	1,06E-07	1,50E-05	T	NM_001005176; NM_001278451; NM_001278452; NM_001278453; NM_007237; ENST00000343805; ENST00000373645; ENST00000392045; ENST00000417495; ENST00000420434; ENST00000441657; ENST00000456542; ENST00000473711; ENST00000476126; ENST00000479539; ENST00000486750; ENST00000538494; ENST00000543928; ENST00000544128; BC105743; BC105744; BC105960; OTTHUMT00000332015; OTTHUMT00000332016; OTTHUMT00000332017; OTTH…	SP140	SP140 nuclear body protein	Multiple_Complex
TC0400008041.hg.1	11,51	9,42	0,31	0,21	T	T	4,25	1,06E-07	1,50E-05	T	NM_006264; NM_080683; NM_080684; NM_080685; ENST00000316707; ENST00000411767; ENST00000427191; ENST00000436978; ENST00000502971; ENST00000507902; ENST00000508063; ENST00000511105; ENST00000511467; BC140777	PTPN13	protein tyrosine phosphatase, non-receptor type 13 (APO-1/CD95 (Fas)-associated phosphatase)	Multiple_Complex
TC0X00008056.hg.1	6,6	8,7	0,31	0,18	T	T	-4,27	1,06E-07	1,50E-05	T	NM_001171092; NM_001171095; NM_020384; ENST00000336803; ENST00000540876; ENST00000541806; BC014424; BC071747; OTTHUMT00000057815	CLDN2	claudin 2	Coding
TC1800007059.hg.1	6,68	5,26	0,12	0,06	T	T	2,67	1,05E-07	1,50E-05	T	NM_001128175; NM_001198938; NM_001198939; NM_001198940; NM_001198941; NM_001198942; NM_001198943; NM_001198944; NM_001198945; NM_001390; NM_001391; NM_001392; NM_032975; NM_032978; NM_032979; NM_032980; NM_032981; ENST00000269192; ENST00000283365; ENST00000315456; ENST00000348997; ENST00000399113; ENST00000399121; ENST00000444659; ENST00000554864; ENST00000556414; ENST00000585446; ENST00000587723…	DTNA	dystrobrevin, alpha	Multiple_Complex
TC0400008879.hg.1	10,29	11,74	0,1	0,15	T	T	-2,75	1,11E-07	1,55E-05	T	NM_002039; NM_207123; ENST00000262994; ENST00000262995; ENST00000505913; ENST00000507070; ENST00000507334; ENST00000508833; ENST00000509992; ENST00000510615; ENST00000511109; ENST00000511836; ENST00000512843; ENST00000514639; ENST00000515366; ENST00000515388; BC064848; OTTHUMT00000364898; OTTHUMT00000364998; OTTHUMT00000364999; OTTHUMT00000365000; OTTHUMT00000365001; OTTHUMT00000365002; OTTHUMT00…	GAB1	GRB2-associated binding protein 1	Multiple_Complex
TC0900007187.hg.1	10,79	8,83	0,05	0,16	T	T	3,9	1,17E-07	1,63E-05	T	NM_000692; ENST00000377698; BC001619; OTTHUMT00000052492	ALDH1B1	aldehyde dehydrogenase 1 family, member B1	Multiple_Complex
TC0100018443.hg.1	10,37	8,97	0,08	0,04	T	T	2,66	1,18E-07	1,63E-05	T	NM_003713; ENST00000371250; ENST00000459962; ENST00000472957; BC009196; OTTHUMT00000022334; OTTHUMT00000095575; OTTHUMT00000095576	PLPP3	phospholipid phosphatase 3	Multiple_Complex
TC0500007044.hg.1	10,93	8,24	0,21	0,34	T	T	6,45	1,18E-07	1,63E-05	T	NM_004932; ENST00000265071; ENST00000504835; ENST00000506396; ENST00000508132; ENST00000514738; BC000019; OTTHUMT00000207355; OTTHUMT00000366552; OTTHUMT00000366553; OTTHUMT00000366555; OTTHUMT00000366556	CDH6	cadherin 6, type 2, K-cadherin (fetal kidney)	Multiple_Complex
TC0X00008521.hg.1	10,95	12,15	0,08	0,1	T	T	-2,3	1,20E-07	1,63E-05	T	NM_001042537; NM_001177651; NM_006359; ENST00000370695; ENST00000370698; ENST00000370701; ENST00000626147; ENST00000627534; ENST00000630721; BC035029; BC049169; OTTHUMT00000058450; OTTHUMT00000058451; OTTHUMT00000058452; OTTHUMT00000481691; OTTHUMT00000481692; OTTHUMT00000481693; uc004ezj.3	SLC9A6	solute carrier family 9, subfamily A (NHE6, cation proton antiporter 6), member 6	Multiple_Complex
TC0X00008596.hg.1	16,85	15,3	0,1	0,15	T	T	2,93	1,20E-07	1,63E-05	T	hsa_circ_0001946; OTTHUMT00000481661; uc004fbf.2	CDR1; CDR1-AS	Memczak2013 ANTISENSE, CDS, coding, downstream_end, upstream_start, UTR3, UTR5 best transcript NM_004065; CDR1 antisense RNA; CDR1 antisense RNA [Source:HGNC Symbol;Acc:HGNC:48926]	NonCoding
TC0100014852.hg.1	13,26	11,89	0,11	0,01	T	T	2,58	1,23E-07	1,64E-05	T	NM_002053; ENST00000370473; ENST00000459831; ENST00000468959; ENST00000469194; ENST00000479889; ENST00000484970; ENST00000493139; ENST00000495131; BC002666; OTTHUMT00000029289; OTTHUMT00000029391; OTTHUMT00000029392; OTTHUMT00000029393; OTTHUMT00000097588; OTTHUMT00000097589; OTTHUMT00000097590; OTTHUMT00000097591	GBP1	guanylate binding protein 1, interferon-inducible	Multiple_Complex
TC0100016427.hg.1	4,84	7,34	0,2	0,29	F	T	-5,65	1,27E-07	1,64E-05	F	NM_005092; ENST00000404377; BC069319; BC093986; BC112032; OTTHUMT00000084268	TNFSF18	tumor necrosis factor (ligand) superfamily, member 18	Coding
TC0200009041.hg.1	12,13	13,33	0,02	0,08	T	T	-2,3	1,25E-07	1,64E-05	T	NM_006773; ENST00000263239; ENST00000415038; ENST00000461443; ENST00000474694; ENST00000476149; ENST00000489933; BC001238; BC003360; BC024739; OTTHUMT00000129632; OTTHUMT00000129633; OTTHUMT00000129634; OTTHUMT00000129635; OTTHUMT00000145672; OTTHUMT00000268560	DDX18	DEAD (Asp-Glu-Ala-Asp) box polypeptide 18	Multiple_Complex
TC0X00009185.hg.1	9,01	10,47	0,02	0,21	T	T	-2,75	1,24E-07	1,64E-05	T	NM_006089; NR_033717; ENST00000251900; ENST00000398048; ENST00000420857; ENST00000491988; BC064617; OTTHUMT00000055941; OTTHUMT00000055942; OTTHUMT00000055943	SCML2	sex comb on midleg-like 2 (Drosophila)	Multiple_Complex
TC1200008629.hg.1	11,63	10,01	0,14	0,27	T	T	3,08	1,26E-07	1,64E-05	T	NM_018370; ENST00000258534; ENST00000544152; ENST00000546729; ENST00000549066; ENST00000549365; ENST00000551403; ENST00000614926; BC018435; OTTHUMT00000409195; OTTHUMT00000409196; OTTHUMT00000409197; OTTHUMT00000409198; OTTHUMT00000409199; OTTHUMT00000409200; OTTHUMT00000474591	DRAM1	DNA-damage regulated autophagy modulator 1	Multiple_Complex
TC1200011460.hg.1	10,27	8,02	0,08	0,26	T	T	4,75	1,23E-07	1,64E-05	T	NM_000899; NM_003994; ENST00000228280; ENST00000347404; ENST00000357116; ENST00000378535; ENST00000552044; ENST00000613305; BC069733; BC069783; BC069797; BC074725; BC126166; BC143899; OTTHUMT00000406423; OTTHUMT00000406424; OTTHUMT00000406425; OTTHUMT00000406426; OTTHUMT00000406427	KITLG	KIT ligand	Multiple_Complex
TC1200012753.hg.1	5,62	8,28	0,45	0,15	T	T	-6,33	1,27E-07	1,64E-05	T	NM_002260; ENST00000381901; ENST00000381902; ENST00000535069; ENST00000537017; ENST00000619500; BC093644; BC112039; OTTHUMT00000400111; OTTHUMT00000400113; OTTHUMT00000400275	KLRC2	killer cell lectin-like receptor subfamily C, member 2	Coding
TSUnmapped00000622.hg.1	9,2	6,86	0,29	0,3	T	T	5,06	1,22E-07	1,64E-05	T	ENST00000632802	GREM1	gremlin 1, DAN family BMP antagonist [Source:HGNC Symbol;Acc:HGNC:2001]	Coding
TC0400011014.hg.1	11,15	9,62	0,07	0	T	T	2,88	1,31E-07	1,68E-05	T	NM_002994; ENST00000296027; BC008376; OTTHUMT00000362749	CXCL5	chemokine (C-X-C motif) ligand 5	Multiple_Complex
TC1000012580.hg.1	10,51	11,95	0,22	0,04	T	T	-2,7	1,33E-07	1,68E-05	T	NM_001204300; NM_001256423; NM_032900; ENST00000358308; ENST00000358531; ENST00000371027; ENST00000466484; ENST00000487035; ENST00000492211; ENST00000493068; BC113888; BC114490; OTTHUMT00000049646; OTTHUMT00000049647; OTTHUMT00000049648; OTTHUMT00000049649; OTTHUMT00000049650; OTTHUMT00000467775	ARHGAP19	Rho GTPase activating protein 19	Multiple_Complex
TC1700012432.hg.1	9,39	7,57	0,1	0,28	T	T	3,53	1,32E-07	1,68E-05	T	NM_002146; NM_024015; NR_029608; ENST00000311626; ENST00000332503; ENST00000385043; ENST00000460160; ENST00000464266; ENST00000465120; ENST00000470495; ENST00000471459; ENST00000472863; ENST00000476342; ENST00000478644; ENST00000489475; ENST00000490677; ENST00000498678; BC049204; OTTHUMT00000358259; OTTHUMT00000358261; OTTHUMT00000358262; OTTHUMT00000358263; OTTHUMT00000358264; OTTHUMT00000358265…	HOXB3; HOXB4; MIR10A	homeobox B3; homeobox B4; microRNA 10a	Multiple_Complex
TSUnmapped00000107.hg.1	9,27	7,68	0,18	0,16	T	T	3,02	1,42E-07	1,79E-05	T	ENST00000626413	DUSP16	dual specificity phosphatase 16	Coding
TC0100007103.hg.1	10,97	12,44	0,08	0,17	T	T	-2,76	1,57E-07	1,96E-05	T	NM_016233; ENST00000375460; BC041592; BC109091; BC109092; OTTHUMT00000006805	PADI3	peptidyl arginine deiminase, type III	Coding
TC0900007518.hg.1	9,37	7,24	0,19	0,26	T	T	4,37	1,57E-07	1,96E-05	T	NM_153267; ENST00000377182; ENST00000460688; BC016383; BC063634; OTTHUMT00000052600; OTTHUMT00000052601	MAMDC2	MAM domain containing 2	Multiple_Complex
TC0400006661.hg.1	10,86	9,37	0,09	0,17	T	T	2,82	1,59E-07	1,96E-05	T	NM_001306082; NM_018401; ENST00000282908; ENST00000505508; ENST00000508728; ENST00000510398; ENST00000511959; ENST00000512018; ENST00000512636; ENST00000513705; BC038238; OTTHUMT00000206854; OTTHUMT00000358206; OTTHUMT00000358208; OTTHUMT00000358209; OTTHUMT00000358210; OTTHUMT00000358211; OTTHUMT00000358212; OTTHUMT00000358739	STK32B	serine/threonine kinase 32B	Multiple_Complex
TC0800012457.hg.1	12,54	11,12	0,12	0,09	T	T	2,69	1,60E-07	1,96E-05	T	NM_194291; BC032396; BC041379	TMEM65	transmembrane protein 65	Multiple_Complex
TC1500010864.hg.1	9,67	8,49	0,03	0,04	T	T	2,26	1,60E-07	1,96E-05	T	NM_001482; ENST00000396659; ENST00000558118; ENST00000558163; ENST00000558336; ENST00000558362; ENST00000558537; ENST00000558916; ENST00000559885; ENST00000561376; BC004141; OTTHUMT00000254220; OTTHUMT00000416531; OTTHUMT00000416532; OTTHUMT00000416533; OTTHUMT00000416534; OTTHUMT00000416535; OTTHUMT00000416536; OTTHUMT00000416538; OTTHUMT00000416539	GATM	glycine amidinotransferase (L-arginine:glycine amidinotransferase)	Multiple_Complex
TC0300011247.hg.1	8,52	6,99	0,09	0,16	T	T	2,89	1,67E-07	2,01E-05	T	NM_001256105; NM_003392; ENST00000264634; ENST00000474267; ENST00000482079; ENST00000493406; ENST00000497027; ENST00000497817; ENST00000614415; BC064694; OTTHUMT00000350793; OTTHUMT00000350845; OTTHUMT00000350847; OTTHUMT00000350848; OTTHUMT00000350849	WNT5A	wingless-type MMTV integration site family, member 5A	Multiple_Complex
TC0500008941.hg.1	10,85	11,99	0,05	0,03	T	T	-2,2	1,65E-07	2,01E-05	T	NM_001135608; NM_015071; ENST00000274498; ENST00000378004; ENST00000378013; ENST00000418236; ENST00000419676; ENST00000421521; ENST00000424007; ENST00000425417; ENST00000443045; ENST00000443674; ENST00000451259; ENST00000461314; ENST00000464838; ENST00000469131; ENST00000469396; ENST00000470032; ENST00000475287; ENST00000477867; ENST00000486650; ENST00000489924; BC068555; OTTHUMT00000132744; OTTH…	ARHGAP26	Rho GTPase activating protein 26	Multiple_Complex
TC1100008514.hg.1	10,82	8,46	0,02	0,4	T	T	5,14	1,66E-07	2,01E-05	T	NM_001258210; NM_015516; ENST00000333090; ENST00000525167; ENST00000527881; ENST00000533752; ENST00000612930; BC020975; OTTHUMT00000382868; OTTHUMT00000382869; OTTHUMT00000382870; OTTHUMT00000382871	TSKU	tsukushi, small leucine rich proteoglycan	Multiple_Complex
TC0700011658.hg.1	11,22	9,65	0,06	0,27	T	T	2,97	1,70E-07	2,04E-05	T	NM_001178129; NM_012431; ENST00000307792; ENST00000427262; ENST00000442159; ENST00000453333; BC140706; BC144338; BC152458; OTTHUMT00000336606; OTTHUMT00000336607; OTTHUMT00000342240; OTTHUMT00000342241	SEMA3E	sema domain, immunoglobulin domain (Ig), short basic domain, secreted, (semaphorin) 3E	Coding
TC0100015871.hg.1	8,41	10,37	0,17	0,11	T	T	-3,87	1,76E-07	2,10E-05	T	NM_080388; ENST00000368703; ENST00000368704; ENST00000368705; ENST00000368706; ENST00000474991; BC010541; BC019099; BC095462; OTTHUMT00000037712; OTTHUMT00000037713; OTTHUMT00000084604; OTTHUMT00000084605; OTTHUMT00000084606	S100A16	S100 calcium binding protein A16	Multiple_Complex
TC1200011786.hg.1	9,09	6,42	0,28	0,37	T	T	6,35	1,78E-07	2,11E-05	T	NM_014840; ENST00000261402; ENST00000548902; ENST00000549704; ENST00000553094; BC152462; OTTHUMT00000405767; OTTHUMT00000405770; OTTHUMT00000405771; OTTHUMT00000405772	NUAK1	NUAK family, SNF1-like kinase, 1	Multiple_Complex
TC0500007138.hg.1	8,36	5,64	0,28	0,43	T	T	6,56	1,93E-07	2,27E-05	T	NM_002185; NR_120485; ENST00000303115; ENST00000505093; ENST00000505875; ENST00000506850; ENST00000508941; ENST00000509668; ENST00000511031; ENST00000511982; ENST00000514217; ENST00000515665; BC067537; BC067538; BC067539; BC067540; BC069999; OTTHUMT00000207577; OTTHUMT00000367183; OTTHUMT00000367184; OTTHUMT00000367185; OTTHUMT00000367186; OTTHUMT00000367187; OTTHUMT00000367188; OTTHUMT0000036718…	IL7R	interleukin 7 receptor	Multiple_Complex
TC1600011557.hg.1	10,1	11,31	0,05	0,03	T	T	-2,3	1,93E-07	2,27E-05	T	NM_005652; ENST00000254942; ENST00000564982; ENST00000566051; ENST00000566257; ENST00000566750; ENST00000567130; ENST00000567296; ENST00000567841; ENST00000569280; ENST00000569542; ENST00000569584; ENST00000569611; BC024890; OTTHUMT00000268944; OTTHUMT00000431464; OTTHUMT00000431465; OTTHUMT00000431466; OTTHUMT00000431467; OTTHUMT00000431468; OTTHUMT00000431469; OTTHUMT00000431470; OTTHUMT0000043…	TERF2	telomeric repeat binding factor 2	Multiple_Complex
TC0200011219.hg.1	7,14	5,6	0,09	0,24	T	F	2,92	2,02E-07	2,35E-05	F	NM_020311; ENST00000272928; ENST00000447924; BC036661; OTTHUMT00000257079; OTTHUMT00000329276	ACKR3	atypical chemokine receptor 3	Multiple_Complex
TC1200009967.hg.1	9,28	7,47	0,31	0,06	T	T	3,5	2,08E-07	2,41E-05	T	NM_030640; ENST00000228862; ENST00000298573; ENST00000536236; ENST00000539940; ENST00000541207; ENST00000545864; BC042101; BC109234; BC109235; OTTHUMT00000400311; OTTHUMT00000400312; OTTHUMT00000400313; OTTHUMT00000400314; OTTHUMT00000400315	DUSP16	dual specificity phosphatase 16	Multiple_Complex
TC0100015155.hg.1	10,55	11,97	0,19	0,04	T	T	-2,68	2,14E-07	2,45E-05	T	NM_001079874; NM_006113; ENST00000343258; ENST00000370056; ENST00000415432; ENST00000469325; ENST00000479977; ENST00000490388; ENST00000524574; ENST00000525231; ENST00000525460; ENST00000527011; ENST00000529033; ENST00000529413; ENST00000529809; ENST00000530671; ENST00000533398; BC143969; OTTHUMT00000030242; OTTHUMT00000030243; OTTHUMT00000030244; OTTHUMT00000030246; OTTHUMT00000390743; OTTHUMT00…	VAV3	vav 3 guanine nucleotide exchange factor	Multiple_Complex
TC0500011296.hg.1	6,84	4,7	0,4	0,15	T	F	4,4	2,13E-07	2,45E-05	F	NM_130767; ENST00000307624; ENST00000506440; ENST00000508234; ENST00000513751; BC075010; BC075011; OTTHUMT00000254074; OTTHUMT00000369693; OTTHUMT00000369694; OTTHUMT00000369695	ACOT12	acyl-CoA thioesterase 12	Multiple_Complex
TC0100007206.hg.1	6,26	4,21	0,19	0,09	T	F	4,14	2,19E-07	2,49E-05	F	NM_001785; ENST00000375071; ENST00000461985; BC054036; OTTHUMT00000007965; OTTHUMT00000007966	CDA	cytidine deaminase	Multiple_Complex
TC0700012276.hg.1	11,32	12,91	0,34	0,1	T	T	-3,02	2,18E-07	2,49E-05	T	NM_014705; ENST00000417165; ENST00000423057; ENST00000428053; ENST00000428084; ENST00000437129; ENST00000437633; ENST00000445943; ENST00000450156; ENST00000464338; ENST00000468571; ENST00000469898; ENST00000476846; ENST00000486186; ENST00000492436; ENST00000492532; ENST00000494651; ENST00000494769; BC117688; BC117689; BC117694; OTTHUMT00000338369; OTTHUMT00000338940; OTTHUMT00000338941; OTTHUMT00…	DOCK4	dedicator of cytokinesis 4	Multiple_Complex
TC0500009342.hg.1	10,72	9,13	0,16	0,18	T	T	3,02	2,23E-07	2,51E-05	T	NM_001122679; ENST00000403607; ENST00000517586; ENST00000517941; ENST00000518659; ENST00000518693; ENST00000519204; ENST00000520393; ENST00000520394; ENST00000521126; ENST00000522488; ENST00000545108; OTTHUMT00000371066; OTTHUMT00000371190; OTTHUMT00000371191; OTTHUMT00000371192; OTTHUMT00000371193; OTTHUMT00000371194; OTTHUMT00000371195; OTTHUMT00000376096; OTTHUMT00000376097	TENM2	teneurin transmembrane protein 2	Multiple_Complex
TC1100012123.hg.1	8,23	6,06	0,23	0,34	T	T	4,48	2,23E-07	2,51E-05	T	NM_002423; ENST00000260227; ENST00000531200; ENST00000533366; BC003635; OTTHUMT00000109633; OTTHUMT00000394187; OTTHUMT00000394188	MMP7	matrix metallopeptidase 7	Multiple_Complex
TC0200015616.hg.1	12,31	10,57	0,11	0,24	T	T	3,35	2,29E-07	2,56E-05	T	NM_001042599; NM_005235; ENST00000260943; ENST00000342788; ENST00000402597; ENST00000435846; ENST00000436443; ENST00000459774; ENST00000463121; ENST00000484474; ENST00000484594; BC112199; BC143741; BC143747; BC143749; OTTHUMT00000256597; OTTHUMT00000336976; OTTHUMT00000336977; OTTHUMT00000336978; OTTHUMT00000336979; OTTHUMT00000336980; OTTHUMT00000336981; OTTHUMT00000336982	ERBB4	erb-b2 receptor tyrosine kinase 4	Multiple_Complex
TC0200010636.hg.1	9,19	7,14	0,33	0,21	T	T	4,13	2,33E-07	2,59E-05	T	NM_001039538; NM_002374; NM_031845; NM_031847; ENST00000199940; ENST00000360351; ENST00000361559; ENST00000392193; ENST00000392194; ENST00000445941; ENST00000447185; ENST00000452717; ENST00000461253; ENST00000464007; ENST00000471619; ENST00000473543; ENST00000475600; ENST00000478233; ENST00000481649; ENST00000482864; OTTHUMT00000256521; OTTHUMT00000256522; OTTHUMT00000258126; OTTHUMT00000258128; …	MAP2	microtubule associated protein 2	Multiple_Complex
TC1200011470.hg.1	8,76	10,3	0,2	0,16	T	T	-2,91	2,37E-07	2,62E-05	T	NM_001946; NM_022652; ENST00000279488; ENST00000308385; ENST00000547140; ENST00000547291; ENST00000548755; BC003143; BC003562; BC005047; BC037236; OTTHUMT00000406534; OTTHUMT00000406535; OTTHUMT00000406536; OTTHUMT00000406537; OTTHUMT00000406538	DUSP6	dual specificity phosphatase 6	Multiple_Complex
TC1600009349.hg.1	7,51	5,69	0,27	0,22	T	F	3,52	2,40E-07	2,64E-05	F	NM_000833; NM_001134407; NM_001134408; ENST00000330684; ENST00000396573; ENST00000396575; ENST00000461292; ENST00000463531; ENST00000535259; ENST00000562109; ENST00000566665; ENST00000566670; ENST00000566683; ENST00000568247; BC117131; BC143273	GRIN2A	glutamate receptor, ionotropic, N-methyl D-aspartate 2A	Multiple_Complex
TC0500008175.hg.1	10,67	11,99	0,1	0,08	T	T	-2,49	2,42E-07	2,65E-05	T	NM_001012761; ENST00000308234; ENST00000434027; ENST00000504776; ENST00000505265; ENST00000507054; ENST00000508978; ENST00000513185; BC067736; OTTHUMT00000370306; OTTHUMT00000370307; OTTHUMT00000370308; OTTHUMT00000370309; OTTHUMT00000370310; OTTHUMT00000370311; OTTHUMT00000370312; uc003knc.3	RGMB	repulsive guidance molecule family member b	Multiple_Complex
TC0700012477.hg.1	8,54	6,8	0,28	0,11	T	T	3,35	2,50E-07	2,72E-05	T	NM_005302; ENST00000303921; BC040007; OTTHUMT00000347873	GPR37	G protein-coupled receptor 37 (endothelin receptor type B-like)	Coding
TC0800010558.hg.1	12,86	11,63	0,08	0,13	T	T	2,34	2,59E-07	2,80E-05	T	NM_014729; ENST00000361421; BC016665; OTTHUMT00000378307; uc003xtw.1	TOX	thymocyte selection-associated high mobility group box	Multiple_Complex
TC1200012592.hg.1	11,1	9,07	0,15	0,32	T	T	4,1	2,61E-07	2,80E-05	T	NM_001734; NM_201442; ENST00000328916; ENST00000360817; ENST00000402681; ENST00000403949; ENST00000413211; ENST00000423384; ENST00000443875; ENST00000461983; ENST00000463798; ENST00000470326; ENST00000473545; ENST00000488701; ENST00000489541; ENST00000495053; ENST00000495061; ENST00000497061; ENST00000541647; ENST00000542978; ENST00000543187; ENST00000617865; BC056903; OTTHUMT00000317482; OTTHUMT…	C1S	complement component 1, s subcomponent	Multiple_Complex
TC1300008793.hg.1	10,52	9,31	0,04	0,15	T	T	2,32	2,61E-07	2,80E-05	T	NM_001243797; NM_001243798; NM_001243799; NM_006022; NM_183422; ENST00000261489; ENST00000437455; ENST00000458659; ENST00000460842; ENST00000472477; ENST00000486464; ENST00000487881; ENST00000493016; ENST00000496314; ENST00000496838; ENST00000501704; ENST00000611198; ENST00000622051; BC136475; BC136482; OTTHUMT00000044742; OTTHUMT00000044743; OTTHUMT00000044744; OTTHUMT00000044745; OTTHUMT0000004…	TSC22D1	TSC22 domain family, member 1	Multiple_Complex
TC1000008054.hg.1	12,38	13,46	0,11	0,06	T	T	-2,12	2,63E-07	2,81E-05	T	NM_001145031; NM_002658; ENST00000372764; ENST00000446342; ENST00000481390; ENST00000494287; ENST00000496926; BC013575; OTTHUMT00000048727; OTTHUMT00000048730; OTTHUMT00000048731; OTTHUMT00000048733	PLAU	plasminogen activator, urokinase	Multiple_Complex
TC0X00010652.hg.1	10,73	11,97	0,03	0,11	T	T	-2,35	2,68E-07	2,84E-05	T	NM_023010; NM_080632; ENST00000276201; ENST00000345865; ENST00000478840; ENST00000619445; BC121017; OTTHUMT00000058068; OTTHUMT00000058069; OTTHUMT00000058070	UPF3B	UPF3 regulator of nonsense transcripts homolog B (yeast)	Multiple_Complex
TC0X00008526.hg.1	7,57	8,96	0,21	0,07	T	T	-2,62	2,76E-07	2,91E-05	T	NM_001159699; NM_001159700; NM_001159701; NM_001159702; NM_001159703; NM_001159704; NM_001167819; NM_001449; NR_027621; ENST00000345434; ENST00000370674; ENST00000370676; ENST00000370683; ENST00000370690; ENST00000394153; ENST00000394155; ENST00000420362; ENST00000434885; ENST00000449474; ENST00000452016; ENST00000456445; ENST00000458357; ENST00000477080; ENST00000477204; ENST00000535737; ENST000…	FHL1	four and a half LIM domains 1	Multiple_Complex
TC1100012165.hg.1	11,11	9,42	0,21	0,08	T	T	3,23	2,81E-07	2,94E-05	T	NM_001225; NM_033306; ENST00000393150; ENST00000417440; ENST00000444739; ENST00000524843; ENST00000525116; ENST00000529183; ENST00000529565; ENST00000530309; ENST00000531333; ENST00000531546; ENST00000533252; ENST00000533730; ENST00000534356; ENST00000613196; BC017839; OTTHUMT00000387751; OTTHUMT00000387752; OTTHUMT00000387753; OTTHUMT00000387754; OTTHUMT00000387755; OTTHUMT00000387756; OTTHUMT00…	CASP4	caspase 4	Multiple_Complex
TC1200008116.hg.1	11,26	9,98	0,1	0,06	T	T	2,44	2,81E-07	2,94E-05	T	NM_001145337; NM_001145339; NM_001145340; NM_001278462; NM_002392; ENST00000258148; ENST00000258149; ENST00000299252; ENST00000311420; ENST00000348801; ENST00000350057; ENST00000356290; ENST00000360430; ENST00000393410; ENST00000393412; ENST00000393413; ENST00000393415; ENST00000393416; ENST00000393417; ENST00000400501; ENST00000428863; ENST00000462284; ENST00000471946; ENST00000478070; ENST00000…	MDM2	MDM2 proto-oncogene, E3 ubiquitin protein ligase	Multiple_Complex
TC1200008275.hg.1	12,16	10,81	0,13	0,22	T	T	2,55	2,99E-07	3,10E-05	T	NM_001135805; NM_001135806; NM_001291901; NM_005639; ENST00000261205; ENST00000393240; ENST00000446242; ENST00000457153; ENST00000547046; ENST00000549454; ENST00000549559; ENST00000549671; ENST00000551304; ENST00000552074; ENST00000552624; ENST00000552744; BC058917; OTTHUMT00000259415; OTTHUMT00000259416; OTTHUMT00000259417; OTTHUMT00000407107; OTTHUMT00000407108; OTTHUMT00000407109; OTTHUMT00000…	SYT1	synaptotagmin I	Multiple_Complex
TC1300008010.hg.1	12,04	10,49	0,18	0,28	T	T	2,93	3,00E-07	3,10E-05	T	NM_001846; ENST00000360467; ENST00000400163; ENST00000462309; ENST00000463084; ENST00000478681; ENST00000480609; ENST00000480771; ENST00000483683; ENST00000494852; ENST00000617564; OTTHUMT00000045761; OTTHUMT00000045762; OTTHUMT00000045763; OTTHUMT00000312857; OTTHUMT00000312858; OTTHUMT00000312859; OTTHUMT00000312860; OTTHUMT00000312861; OTTHUMT00000312862; OTTHUMT00000474671	COL4A2	collagen, type IV, alpha 2	Multiple_Complex
TC0100018565.hg.1	11,46	9,4	0,04	0,43	T	T	4,17	3,08E-07	3,16E-05	T	NM_000029; ENST00000366667; BC011519; OTTHUMT00000092102	AGT	angiotensinogen (serpin peptidase inhibitor, clade A, member 8)	Multiple_Complex
TC0400007128.hg.1	11,52	10,29	0,08	0,1	T	T	2,34	3,08E-07	3,16E-05	T	NM_001292054; NM_018317; ENST00000264866; ENST00000502873; ENST00000504442; ENST00000505206; ENST00000511789; ENST00000512840; ENST00000513455; ENST00000513596; ENST00000515568; BC031642; OTTHUMT00000215052; OTTHUMT00000360191; OTTHUMT00000360192; OTTHUMT00000360193; OTTHUMT00000360194; OTTHUMT00000360245; OTTHUMT00000360246; OTTHUMT00000360247; OTTHUMT00000360248	TBC1D19	TBC1 domain family, member 19	Multiple_Complex
TC0100018271.hg.1	13,53	12,22	0,08	0,11	T	T	2,49	3,11E-07	3,18E-05	T	NM_001286352; NM_001286353; NM_020190; ENST00000320334; ENST00000369551; ENST00000393300; ENST00000491700; BC009920; OTTHUMT00000033119; OTTHUMT00000033120; OTTHUMT00000033121	OLFML3	olfactomedin like 3	Multiple_Complex
TC1600010861.hg.1	4	6,81	0,08	0,55	F	T	-7,05	3,16E-07	3,21E-05	F	NM_024306; ENST00000219368; ENST00000562145; ENST00000567683; ENST00000569949; ENST00000618933; BC002679; BC004263; BC017049; OTTHUMT00000269015; OTTHUMT00000434206; OTTHUMT00000434207; OTTHUMT00000434208; OTTHUMT00000474187	FA2H	fatty acid 2-hydroxylase	Multiple_Complex
TC1200012016.hg.1	9,72	8,5	0,11	0,14	T	T	2,32	3,21E-07	3,25E-05	T	NM_005996; NM_016569; ENST00000257566; ENST00000349155; ENST00000548503; ENST00000552054; ENST00000613550; BC025258; OTTHUMT00000404945; OTTHUMT00000404947; OTTHUMT00000404948; OTTHUMT00000404957; uc001tvu.1	TBX3	T-box 3	Multiple_Complex
TC1000007883.hg.1	12,82	13,96	0,09	0,09	T	T	-2,21	3,32E-07	3,34E-05	T	NM_002727; NR_036430; ENST00000242465; ENST00000462445; BC015516; OTTHUMT00000048379; OTTHUMT00000048380	SRGN	serglycin	Multiple_Complex
TC0300006905.hg.1	10,95	9,2	0,24	0,08	T	T	3,35	3,36E-07	3,36E-05	T	NM_001003792; NM_001003793; NM_001177711; NM_001177712; NM_014483; ENST00000273139; ENST00000383766; ENST00000383767; ENST00000434693; ENST00000445033; ENST00000452462; ENST00000456853; ENST00000471426; ENST00000473799; ENST00000478716; ENST00000497205; ENST00000497274; ENST00000497319; BC117315; BC143521; OTTHUMT00000341298; OTTHUMT00000341299; OTTHUMT00000341300; OTTHUMT00000341301; OTTHUMT0000…	RBMS3	RNA binding motif, single stranded interacting protein 3	Multiple_Complex
TC1200012601.hg.1	12,98	11,61	0,06	0,13	T	T	2,59	3,36E-07	3,36E-05	T	NM_019844; ENST00000261196; ENST00000381545; ENST00000540853; ENST00000544370; ENST00000545880; OTTHUMT00000401935; OTTHUMT00000401936; OTTHUMT00000401971; OTTHUMT00000402065	SLCO1B3	solute carrier organic anion transporter family, member 1B3	Multiple_Complex
TC2100007321.hg.1	12,13	10,77	0,1	0,13	T	T	2,56	3,53E-07	3,51E-05	T	NM_003681; BC000123; BC005825; BC008008; BC021550; BC041020; OTTHUMT00000195635; OTTHUMT00000195636; OTTHUMT00000195639; OTTHUMT00000195640; OTTHUMT00000195641; OTTHUMT00000195642; OTTHUMT00000195643; OTTHUMT00000195644; OTTHUMT00000195645; OTTHUMT00000195646; OTTHUMT00000195647; OTTHUMT00000195648; OTTHUMT00000195649; OTTHUMT00000195656; OTTHUMT00000195657; OTTHUMT00000195658; OTTHUMT00000195674…	PDXK	pyridoxal (pyridoxine, vitamin B6) kinase	Multiple_Complex
TC1700007899.hg.1	9,64	11,16	0,2	0,17	T	T	-2,87	3,56E-07	3,52E-05	T	NM_170607; NM_198204; NM_198205; ENST00000246912; ENST00000346833; ENST00000435881; ENST00000585403; ENST00000586393; ENST00000588320; ENST00000590050; ENST00000590084; ENST00000591024; ENST00000591195; ENST00000592717; BC010689; OTTHUMT00000450414; OTTHUMT00000450415; OTTHUMT00000450416; OTTHUMT00000450417; OTTHUMT00000450418; OTTHUMT00000450419; OTTHUMT00000450420; OTTHUMT00000450421; OTTHUMT00…	MLX	MLX, MAX dimerization protein	Multiple_Complex
TC1200012863.hg.1	10,4	9,18	0,08	0,08	T	T	2,32	3,59E-07	3,53E-05	T	ENST00000542348; ENST00000544798; OTTHUMT00000400789; OTTHUMT00000400790	CCDC92	coiled-coil domain containing 92	NonCoding
TC2000007830.hg.1	10,48	11,76	0,23	0,11	T	T	-2,41	3,67E-07	3,59E-05	T	NM_003222; ENST00000201031; ENST00000416606; BC035664; BC051829; OTTHUMT00000079823; OTTHUMT00000259468	TFAP2C	transcription factor AP-2 gamma (activating enhancer binding protein 2 gamma)	Coding
TC0200008627.hg.1	13,51	12,3	0,06	0,11	T	T	2,32	3,78E-07	3,67E-05	T	NM_002518; ENST00000335681; ENST00000427413; ENST00000433408; ENST00000448812; ENST00000450763; ENST00000451740; ENST00000471974; ENST00000474550; ENST00000486017; ENST00000490052; ENST00000492373; ENST00000495559; BC051351; BC072383; OTTHUMT00000253168; OTTHUMT00000329071; OTTHUMT00000329072; OTTHUMT00000329073; OTTHUMT00000329074; OTTHUMT00000329075; OTTHUMT00000329076; OTTHUMT00000329077; OTTH…	NPAS2	neuronal PAS domain protein 2	Multiple_Complex
TC0300008320.hg.1	4,68	6,98	0,44	0,2	F	T	-4,92	3,78E-07	3,67E-05	F	NM_005816; NM_198196; ENST00000283285; ENST00000352690; ENST00000438817; ENST00000460744; ENST00000465428; ENST00000488054; ENST00000494798; BC020749	CD96	CD96 molecule	Multiple_Complex
TC0600009256.hg.1	9,75	8,31	0,12	0,13	T	T	2,72	3,85E-07	3,72E-05	T	NM_173674; ENST00000296955; ENST00000338728; ENST00000424717; ENST00000478345; ENST00000481630; ENST00000487076; ENST00000525483; ENST00000528138; ENST00000528162; ENST00000533453; ENST00000533950; ENST00000534777; BC035671; OTTHUMT00000041979; OTTHUMT00000041980; OTTHUMT00000041981; OTTHUMT00000041982; OTTHUMT00000041985; OTTHUMT00000387918; OTTHUMT00000387919; OTTHUMT00000387920; OTTHUMT0000038…	DCBLD1	discoidin, CUB and LCCL domain containing 1	Multiple_Complex
TC0500010615.hg.1	10,47	9,3	0,09	0,16	T	T	2,25	3,90E-07	3,75E-05	T	NM_001085486; NM_001093726; NM_005410; ENST00000505309; ENST00000506078; ENST00000506577; ENST00000507920; ENST00000508937; ENST00000509276; ENST00000510650; ENST00000510965; ENST00000511224; ENST00000512980; ENST00000513303; ENST00000514218; ENST00000514403; ENST00000514985; ENST00000515626; BC015875; BC040075; BC046152; BC058919; OTTHUMT00000367483; OTTHUMT00000367484; OTTHUMT00000367485; OTTHU…	SEPP1	selenoprotein P, plasma, 1	Multiple_Complex
TC0300014064.hg.1	12,63	11,1	0,18	0,08	T	T	2,88	3,93E-07	3,77E-05	T	NM_002628; NM_053024; ENST00000239940; ENST00000423691; ENST00000452853; ENST00000460404; ENST00000461868; ENST00000461930; ENST00000468323; ENST00000475518; ENST00000481275; ENST00000481767; ENST00000489155; ENST00000490975; ENST00000494827; ENST00000497060; ENST00000497148; ENST00000498169; ENST00000498307; BC018049; BC043646; BC095444; OTTHUMT00000356873; OTTHUMT00000357088; OTTHUMT00000357089…	PFN2	profilin 2	Multiple_Complex
TC0300013954.hg.1	8,8	7,47	0,12	0,11	T	T	2,51	3,97E-07	3,79E-05	T	NM_024697; ENST00000281523; ENST00000446749; ENST00000467140; ENST00000469927; ENST00000478967; ENST00000495739; BC007212; OTTHUMT00000252884; OTTHUMT00000340650; OTTHUMT00000340651; OTTHUMT00000340652; OTTHUMT00000340653; OTTHUMT00000340654	ZNF385D	zinc finger protein 385D	Multiple_Complex
TC0700011706.hg.1	7,26	8,57	0,14	0,08	T	T	-2,48	4,05E-07	3,84E-05	T	NM_000927; ENST00000265724; ENST00000416177; ENST00000475929; ENST00000476862; ENST00000482527; ENST00000483831; ENST00000488737; ENST00000491360; ENST00000496821; ENST00000543898; ENST00000622132; BC130424; OTTHUMT00000335444; OTTHUMT00000335739; OTTHUMT00000335740; OTTHUMT00000335741; OTTHUMT00000335742; OTTHUMT00000335743; OTTHUMT00000335744; OTTHUMT00000335745; OTTHUMT00000335746	ABCB1	ATP binding cassette subfamily B member 1	Multiple_Complex
TC0600007534.hg.1	8,41	10,18	0,19	0,14	T	T	-3,41	4,11E-07	3,88E-05	T	NM_025263; ENST00000376557; ENST00000376560; ENST00000470703; ENST00000481741; ENST00000491173; ENST00000498336; BC126455; BC126457; OTTHUMT00000076033; OTTHUMT00000076034; OTTHUMT00000076035; OTTHUMT00000256170; OTTHUMT00000256171; OTTHUMT00000256172	PRR3	proline rich 3	Multiple_Complex
TC0400009253.hg.1	6,97	4,8	0,08	0,39	T	F	4,51	4,13E-07	3,88E-05	F	NM_007193; ENST00000359299; ENST00000503003; ENST00000507278; ENST00000617524; BC007320; OTTHUMT00000364348; OTTHUMT00000364628; OTTHUMT00000364629	ANXA10	annexin A10	Multiple_Complex
TC0500010924.hg.1	9,43	7,63	0,19	0,29	T	T	3,48	4,17E-07	3,89E-05	T	NM_197941; ENST00000314351; ENST00000381052; ENST00000381055; ENST00000417396; ENST00000464680; ENST00000470597; ENST00000502886; ENST00000504282; OTTHUMT00000157331; OTTHUMT00000157334; OTTHUMT00000158252; OTTHUMT00000368524; OTTHUMT00000368525; OTTHUMT00000368526; OTTHUMT00000368527; OTTHUMT00000368528	ADAMTS6	ADAM metallopeptidase with thrombospondin type 1 motif 6	Multiple_Complex
TC0700011665.hg.1	10,23	8,49	0,05	0,1	T	T	3,35	4,17E-07	3,89E-05	T	SEMA3A.gAug10-unspliced	SEMA3A	Transcript Identified by AceView, Entrez Gene ID(s) 10371	Unassigned
TC1900010807.hg.1	10,63	9	0,11	0,34	T	T	3,09	4,26E-07	3,95E-05	T	NM_001024912; NM_001184813; NM_001184815; NM_001184816; NM_001205344; NM_001712; ENST00000161559; ENST00000344391; ENST00000352591; ENST00000358394; ENST00000377806; ENST00000403136; ENST00000403444; ENST00000403461; ENST00000465051; ENST00000471298; ENST00000485605; ENST00000488639; ENST00000599389; ENST00000600172; BC014473; OTTHUMT00000321190; OTTHUMT00000321413; OTTHUMT00000321414; OTTHUMT000…	CEACAM1	carcinoembryonic antigen-related cell adhesion molecule 1 (biliary glycoprotein)	Multiple_Complex
TC0800009745.hg.1	7,78	6,2	0,03	0,08	T	T	2,98	4,32E-07	3,99E-05	T	NM_004467; NM_147203; NM_201552; NM_201553; ENST00000381840; ENST00000381841; ENST00000398054; ENST00000398056; ENST00000427924; ENST00000518650; ENST00000518769; ENST00000519055; ENST00000522444; ENST00000522636; ENST00000523097; BC007047; OTTHUMT00000375254; OTTHUMT00000375256; OTTHUMT00000375257; OTTHUMT00000375258; OTTHUMT00000375397; OTTHUMT00000375565; OTTHUMT00000375566	FGL1	fibrinogen like 1	Multiple_Complex
TC1800006882.hg.1	10,82	9,5	0,1	0,15	T	T	2,5	4,36E-07	4,01E-05	T	NM_001100619; NM_001256438; NM_138375; NR_023359; ENST00000256925; ENST00000400473; ENST00000420687; ENST00000578052; ENST00000579963; ENST00000580153; ENST00000580644; ENST00000582882; ENST00000583220; ENST00000585061; BC037218; OTTHUMT00000445195; OTTHUMT00000445196; OTTHUMT00000445197; OTTHUMT00000445198; OTTHUMT00000445199; OTTHUMT00000445200; OTTHUMT00000445201; OTTHUMT00000445202; OTTHUMT00…	CABLES1	Cdk5 and Abl enzyme substrate 1	Multiple_Complex
TC0200010239.hg.1	9,71	8,11	0,23	0,1	T	T	3,02	4,49E-07	4,12E-05	T	NM_000090; NR_037401; ENST00000304636; ENST00000317840; ENST00000450867; ENST00000467886; ENST00000470167; ENST00000487010; BC028178; OTTHUMT00000255899; OTTHUMT00000313498; OTTHUMT00000313499; OTTHUMT00000334710; OTTHUMT00000334711	COL3A1; MIR3606	collagen, type III, alpha 1; microRNA 3606	Multiple_Complex
TC0900008740.hg.1	10,96	9,35	0,1	0,12	T	T	3,04	4,51E-07	4,12E-05	T	NM_001282715; NM_182487; ENST00000288815; ENST00000331715; ENST00000373580; BC054001; OTTHUMT00000054045; OTTHUMT00000054046; OTTHUMT00000054047	OLFML2A	olfactomedin like 2A	Coding
TC0100008816.hg.1	8,09	6,09	0,12	0,19	T	T	4	4,58E-07	4,16E-05	T	NM_006417; ENST00000370747; ENST00000438486; ENST00000446486; ENST00000467790; ENST00000470323; ENST00000472152; ENST00000476911; ENST00000485662; ENST00000495254; BC022870; OTTHUMT00000026825; OTTHUMT00000026826; OTTHUMT00000026827; OTTHUMT00000026828; OTTHUMT00000026829; OTTHUMT00000026830; OTTHUMT00000026831; OTTHUMT00000026832; OTTHUMT00000026833	IFI44	interferon-induced protein 44	Multiple_Complex
TC0500012599.hg.1	8,55	7,1	0,1	0,13	T	T	2,74	4,66E-07	4,16E-05	T	NM_033274; ENST00000257527; ENST00000517374; ENST00000517905; ENST00000517951; ENST00000519752; OTTHUMT00000252566; OTTHUMT00000373916; OTTHUMT00000373917; OTTHUMT00000373918; OTTHUMT00000373919	ADAM19	ADAM metallopeptidase domain 19	Multiple_Complex
TC0700009493.hg.1	11,58	10,21	0,08	0,16	T	T	2,59	4,65E-07	4,16E-05	T	NM_001010972; NM_003461; ENST00000322764; ENST00000354434; ENST00000392910; ENST00000436448; ENST00000446634; ENST00000449630; ENST00000457235; ENST00000468083; ENST00000477373; ENST00000497119; BC008743; BC009360; BC010031; OTTHUMT00000156296; OTTHUMT00000156297; OTTHUMT00000156298; OTTHUMT00000156299; OTTHUMT00000342162; OTTHUMT00000342163; OTTHUMT00000342164; OTTHUMT00000342165; OTTHUMT0000034…	ZYX	zyxin	Multiple_Complex
TC1300009646.hg.1	11,62	10,5	0,09	0,07	T	T	2,17	4,65E-07	4,16E-05	T	NM_052867; ENST00000251127; ENST00000376200; ENST00000467264; ENST00000470333; ENST00000497170; OTTHUMT00000045663; OTTHUMT00000045664; OTTHUMT00000045665; OTTHUMT00000045666	NALCN	sodium leak channel, non selective	Multiple_Complex
TC1400009617.hg.1	8,61	9,83	0,22	0,13	T	T	-2,33	4,64E-07	4,16E-05	T	NM_001280542; NM_001280543; NM_001280544; NM_012074; ENST00000366353; ENST00000381216; ENST00000541685; ENST00000546183; ENST00000553608; ENST00000554594; ENST00000555469; ENST00000555781; ENST00000556238; ENST00000556509; ENST00000556891; ENST00000556902; ENST00000556997; ENST00000557704; ENST00000610283; ENST00000614862; BC060801; OTTHUMT00000413152; OTTHUMT00000413153; OTTHUMT00000413154; OTTH…	DPF3	D4, zinc and double PHD fingers, family 3	Multiple_Complex
TC0400006578.hg.1	8,5	6,2	0,47	0,21	T	T	4,93	4,72E-07	4,20E-05	T	NM_001122681; NM_001145855; NM_001145856; NM_003023; ENST00000356331; ENST00000435136; ENST00000442312; ENST00000452765; ENST00000502260; ENST00000503219; ENST00000503393; ENST00000504294; ENST00000504450; ENST00000505941; ENST00000506932; ENST00000508338; ENST00000508385; ENST00000509677; ENST00000510074; ENST00000510193; ENST00000510204; ENST00000511185; ENST00000511237; ENST00000511663; ENST00…	SH3BP2	SH3-domain binding protein 2	Multiple_Complex
TC0200010980.hg.1	6,13	8,51	0,35	0,21	T	T	-5,21	4,77E-07	4,21E-05	T	NM_001130046; NM_004591; ENST00000358813; ENST00000409189; ENST00000473642; ENST00000489160; BC020698; OTTHUMT00000256898; OTTHUMT00000331639; OTTHUMT00000331640; OTTHUMT00000331641; uc002vpm.2	CCL20	chemokine (C-C motif) ligand 20	Multiple_Complex
TC1700011574.hg.1	10,36	8,81	0,09	0,16	T	T	2,93	4,75E-07	4,21E-05	T	NM_001288985; NM_001288986; NM_007168; ENST00000269080; ENST00000428549; ENST00000430352; ENST00000541225; ENST00000585531; ENST00000585850; ENST00000586292; ENST00000586539; ENST00000587206; ENST00000588458; ENST00000589533; ENST00000589980; ENST00000590359; ENST00000591459; ENST00000615593; BC130280; OTTHUMT00000450172; OTTHUMT00000450174; OTTHUMT00000450175; OTTHUMT00000450176; OTTHUMT00000450…	ABCA8	ATP binding cassette subfamily A member 8	Multiple_Complex
TC1100013022.hg.1	15,18	14,12	0,1	0,01	T	T	2,1	4,82E-07	4,24E-05	T	NM_001281501; NM_001281502; NM_004265; ENST00000257261; ENST00000278840; ENST00000355484; ENST00000517312; ENST00000517839; ENST00000518606; ENST00000520145; ENST00000521571; ENST00000521849; ENST00000522056; ENST00000522359; ENST00000522639; ENST00000523235; ENST00000543584; BC009011; OTTHUMT00000375581; OTTHUMT00000375582; OTTHUMT00000375583; OTTHUMT00000375584; OTTHUMT00000375585; OTTHUMT00000…	FADS2	fatty acid desaturase 2	Multiple_Complex
TC0200015221.hg.1	6,96	4,54	0,18	0,23	T	F	5,35	4,92E-07	4,31E-05	F	NM_005259; ENST00000260950; BC074757; OTTHUMT00000255917	MSTN	myostatin	Coding
TC1100012753.hg.1	10,34	8,65	0,3	0,15	T	T	3,23	4,98E-07	4,34E-05	T	hsa_circ_0006159	KIRREL3	Jeck2013 ALT_ACCEPTOR, ALT_DONOR, coding, INTERNAL, intronic best transcript NM_032531	NonCoding
TC1000010602.hg.1	12,34	13,45	0,08	0,07	T	T	-2,15	5,05E-07	4,39E-05	T	NM_000124; NM_001277058; NM_001277059; NM_170753; ENST00000355832; ENST00000374127; ENST00000447839; ENST00000462247; ENST00000465653; ENST00000475116; ENST00000479652; ENST00000515869; ENST00000623073; ENST00000623115; ENST00000623318; ENST00000623788; ENST00000624341; BC028954; BC034479; BC063690; BC127104; OTTHUMT00000047988; OTTHUMT00000047990; OTTHUMT00000047991; OTTHUMT00000047992; OTTHUMT0…	ERCC6; ERCC6-PGBD3; PGBD3	excision repair cross-complementation group 6; ERCC6-PGBD3 readthrough; piggyBac transposable element derived 3	Multiple_Complex
TC1400010629.hg.1	8,21	9,6	0,23	0,05	T	T	-2,62	5,08E-07	4,39E-05	T	NM_001195283; NM_017791; ENST00000238667; ENST00000539311; ENST00000553341; ENST00000554496; ENST00000554580; ENST00000555027; ENST00000555058; ENST00000556409; ENST00000556745; ENST00000556856; BC019087; OTTHUMT00000413672; OTTHUMT00000413673; OTTHUMT00000413674; OTTHUMT00000413675; OTTHUMT00000413676; OTTHUMT00000413677; OTTHUMT00000413678; OTTHUMT00000414440; OTTHUMT00000414443; OTTHUMT0000041…	FLVCR2	feline leukemia virus subgroup C cellular receptor family, member 2	Multiple_Complex
TC1000012581.hg.1	10,05	11,26	0,12	0,1	T	T	-2,32	5,13E-07	4,42E-05	T	NR_037909; OTTHUMT00000467774	ARHGAP19-SLIT1	ARHGAP19-SLIT1 readthrough (NMD candidate)	Multiple_Complex
TC2200007505.hg.1	8,2	9,35	0,12	0,09	T	T	-2,22	5,15E-07	4,42E-05	T	NM_019106; NM_145733; ENST00000396417; ENST00000396425; ENST00000396426; ENST00000406029; ENST00000449288; ENST00000460267; BC111779; OTTHUMT00000075382; OTTHUMT00000257773; OTTHUMT00000322051; OTTHUMT00000322052; OTTHUMT00000322053; OTTHUMT00000322054	2003-09-01	septin 3	Multiple_Complex
TC0200008894.hg.1	7,25	8,85	0,2	0,11	T	T	-3,03	5,22E-07	4,43E-05	T	NM_006343; ENST00000295408; ENST00000409780; ENST00000421804; ENST00000439966; ENST00000449344; ENST00000473065; ENST00000616902; BC114917; BC114918; OTTHUMT00000254046; OTTHUMT00000330446; OTTHUMT00000330447; OTTHUMT00000330448; OTTHUMT00000330449	MERTK	MER proto-oncogene, tyrosine kinase	Multiple_Complex
TC1200010971.hg.1	11,68	10,33	0,1	0,15	T	T	2,55	5,20E-07	4,43E-05	T	NM_001261412; NM_001261413; NM_006400; ENST00000434715; ENST00000543672; ENST00000546559; ENST00000546670; ENST00000546758; ENST00000546965; ENST00000547345; ENST00000547480; ENST00000548249; ENST00000548736; ENST00000548949; ENST00000549394; ENST00000549712; ENST00000550086; ENST00000550201; ENST00000550576; ENST00000550750; ENST00000550954; ENST00000550988; ENST00000551142; ENST00000551400; ENS…	DCTN2	dynactin 2 (p50)	Multiple_Complex
TC1700012231.hg.1	9,3	8,24	0,08	0,03	T	T	2,09	5,21E-07	4,43E-05	T	NM_001033504; NM_001301746; NM_015544; ENST00000261713; ENST00000394642; ENST00000395149; ENST00000439138; ENST00000579849; ENST00000582227; ENST00000583120; ENST00000583437; BC000526; OTTHUMT00000256372; OTTHUMT00000256373; OTTHUMT00000256374; OTTHUMT00000256375; OTTHUMT00000447494; OTTHUMT00000447495; OTTHUMT00000447497; OTTHUMT00000447498	TMEM98	transmembrane protein 98	Multiple_Complex
TC1200007408.hg.1	7,79	5,79	0,22	0,37	T	T	4,01	5,29E-07	4,47E-05	T	NM_001286211; NM_001286212; NM_001286213; NM_032256; ENST00000266534; ENST00000546387; ENST00000546868; ENST00000546978; ENST00000550495; ENST00000550623; ENST00000551577; ENST00000553253; BC030284; BC060798; OTTHUMT00000403967; OTTHUMT00000403968; OTTHUMT00000403969; OTTHUMT00000403970; OTTHUMT00000403971; OTTHUMT00000403972; OTTHUMT00000403973; OTTHUMT00000403974	TMEM117	transmembrane protein 117	Multiple_Complex
TC0500008884.hg.1	11,4	10,12	0,14	0,14	T	T	2,42	5,33E-07	4,48E-05	T	NM_018933; ENST00000341948; BC033068; BC051348; BC071934; OTTHUMT00000251810	PCDHB13	protocadherin beta 13	Coding
TC0200009662.hg.1	6,51	8,79	0,49	0,13	T	T	-4,86	5,45E-07	4,57E-05	T	NM_007115; ENST00000243347; ENST00000460812; BC030205; OTTHUMT00000254834; OTTHUMT00000332404; uc002txk.3	TNFAIP6	tumor necrosis factor, alpha-induced protein 6	Multiple_Complex
TC0400011144.hg.1	11,19	12,36	0,08	0,01	T	T	-2,25	5,54E-07	4,61E-05	T	NM_001145794; NM_001286780; NM_001286781; NM_058172; ENST00000307333; ENST00000346652; ENST00000403729; ENST00000404191; ENST00000449651; ENST00000482406; ENST00000491345; ENST00000506286; ENST00000514959; BC107876; OTTHUMT00000324663; OTTHUMT00000324664; OTTHUMT00000324665; OTTHUMT00000324666; OTTHUMT00000324667; OTTHUMT00000324668; OTTHUMT00000324669; OTTHUMT00000363110; OTTHUMT00000363111	ANTXR2	anthrax toxin receptor 2	Multiple_Complex
TC2100007816.hg.1	9,52	7,67	0,33	0,28	T	T	3,61	5,52E-07	4,61E-05	T	NM_052954; ENST00000299340; ENST00000400043; BC036761; OTTHUMT00000171654; OTTHUMT00000171655	CYYR1	cysteine/tyrosine-rich 1	Coding
TC1200006850.hg.1	11,73	10,53	0,08	0,11	T	T	2,29	5,58E-07	4,61E-05	T	NM_001987; ENST00000266427; ENST00000396373; ENST00000541426; ENST00000544715; ENST00000545027; BC043399; OTTHUMT00000400130; OTTHUMT00000400131; OTTHUMT00000400132; OTTHUMT00000400133; OTTHUMT00000400134	ETV6	ets variant 6	Multiple_Complex
TC1500010160.hg.1	8,86	6,58	0,18	0,4	T	T	4,87	5,58E-07	4,61E-05	T	NM_004390; ENST00000220166; ENST00000525807; ENST00000527138; ENST00000527715; ENST00000528191; ENST00000528436; ENST00000528741; ENST00000529263; ENST00000529612; ENST00000529861; ENST00000530010; ENST00000530929; ENST00000533777; ENST00000534038; ENST00000534237; ENST00000534268; ENST00000534533; ENST00000615999; BC002479; OTTHUMT00000291370; OTTHUMT00000384330; OTTHUMT00000384331; OTTHUMT00000…	CTSH	cathepsin H	Multiple_Complex
TC1200009843.hg.1	14,04	12,92	0,04	0,11	T	T	2,18	5,72E-07	4,70E-05	T	NM_001207024; NM_002355; ENST00000000412; ENST00000536844; ENST00000537621; ENST00000539143; ENST00000540837; ENST00000541507; ENST00000543159; ENST00000543258; ENST00000543704; ENST00000543834; ENST00000543845; ENST00000544193; ENST00000544245; BC024206; OTTHUMT00000399128; OTTHUMT00000399129; OTTHUMT00000399130; OTTHUMT00000399131; OTTHUMT00000399132; OTTHUMT00000399133; OTTHUMT00000399134; OTT…	M6PR	mannose-6-phosphate receptor (cation dependent)	Multiple_Complex
TC0300012233.hg.1	9,47	10,62	0,07	0,11	T	T	-2,21	5,81E-07	4,76E-05	T	NM_002213; ENST00000296181; ENST00000460797; ENST00000461306; ENST00000465464; ENST00000474838; ENST00000476988; ENST00000481591; ENST00000483168; ENST00000488466; ENST00000496703; ENST00000608107; ENST00000608657; ENST00000608945; BC006541; OTTHUMT00000355286; OTTHUMT00000355287; OTTHUMT00000355288; OTTHUMT00000356213; OTTHUMT00000356214; OTTHUMT00000356236; OTTHUMT00000356237; OTTHUMT0000035623…	ITGB5	integrin beta 5	Multiple_Complex
TC0700006783.hg.1	13,51	12,42	0,04	0,08	T	T	2,12	5,85E-07	4,76E-05	T	NM_014399; ENST00000262067; ENST00000466195; BC033863; OTTHUMT00000250178; OTTHUMT00000326380	TSPAN13	tetraspanin 13	Multiple_Complex
TC0700013578.hg.1	15,71	14,48	0,09	0,06	T	T	2,35	5,85E-07	4,76E-05	T	NM_006080; ENST00000265362; ENST00000420047; ENST00000436949; BC111416; OTTHUMT00000253355; OTTHUMT00000336604; OTTHUMT00000342239	SEMA3A	sema domain, immunoglobulin domain (Ig), short basic domain, secreted, (semaphorin) 3A	Multiple_Complex
TC0400011994.hg.1	5,53	7,21	0,27	0,25	F	T	-3,21	6,04E-07	4,85E-05	F	NM_001101669; NM_003866; ENST00000262992; ENST00000503927; ENST00000504632; ENST00000505483; ENST00000506000; ENST00000506217; ENST00000506243; ENST00000506297; ENST00000506517; ENST00000506788; ENST00000507462; ENST00000507861; ENST00000508084; ENST00000508116; ENST00000509777; ENST00000510812; ENST00000511838; ENST00000512489; ENST00000512630; ENST00000513000; ENST00000514525; ENST00000514964; …	INPP4B	inositol polyphosphate-4-phosphatase type II B	Multiple_Complex
TC1000010562.hg.1	9,64	8,33	0,18	0,02	T	T	2,47	6,04E-07	4,85E-05	T	NM_031912_2; NM_181519_2; BC139914_2; uc057tca.1; uc057tcb.1; uc057tcc.1	SYT15; ABC7-42404400C24.1	Homo sapiens synaptotagmin XV (SYT15), transcript variant a, mRNA.; Homo sapiens synaptotagmin XV (SYT15), transcript variant b, mRNA.; Homo sapiens synaptotagmin XV, mRNA (cDNA clone MGC:164845 IMAGE:40147906), complete cds.; Synaptotagmin-15 [Source:UniProtKB/Swiss-Prot;Acc:Q9BQS2]	Coding
TSUnmapped00000803.hg.1	7,78	6,2	0,18	0,24	T	T	3	6,02E-07	4,85E-05	T	ENST00000630502	OR5P3	olfactory receptor, family 5, subfamily P, member 3	Coding
TC0700011010.hg.1	10,14	11,31	0,05	0,19	T	T	-2,26	6,16E-07	4,91E-05	T	NM_001030019; NM_001284350; NM_152782; ENST00000297325; ENST00000395572; ENST00000412142; ENST00000412371; ENST00000438771; ENST00000449896; ENST00000453071; ENST00000453192; ENST00000461953; ENST00000473723; BC026189; OTTHUMT00000340962; OTTHUMT00000340963; OTTHUMT00000340964; OTTHUMT00000340965; OTTHUMT00000340966; OTTHUMT00000340967; OTTHUMT00000340968; OTTHUMT00000340969	SUN3	Sad1 and UNC84 domain containing 3	Multiple_Complex
TC2000008445.hg.1	11,34	10,16	0,08	0,08	T	T	2,27	6,15E-07	4,91E-05	T	NM_013281; NM_198391; ENST00000341420; ENST00000378053; ENST00000462077; BC020870; OTTHUMT00000078075; OTTHUMT00000078076; OTTHUMT00000078077	FLRT3	fibronectin leucine rich transmembrane protein 3	Multiple_Complex
TC1200007050.hg.1	5,01	6,63	0,04	0,08	F	T	-3,08	6,19E-07	4,92E-05	F	NM_000415; ENST00000240652; ENST00000535428; ENST00000537593; ENST00000539393; ENST00000542023; OTTHUMT00000402355; OTTHUMT00000402356; OTTHUMT00000402357; OTTHUMT00000402358; OTTHUMT00000402359	IAPP	islet amyloid polypeptide	Coding
TC0X00008794.hg.1	11,34	9,51	0,25	0,21	T	T	3,58	6,38E-07	5,05E-05	T	NM_001142805; NM_001142806; NM_005629; ENST00000253122; ENST00000413787; ENST00000429147; ENST00000430077; ENST00000442457; ENST00000457723; ENST00000466243; ENST00000467402; ENST00000476466; ENST00000485324; BC012355; BC081558; OTTHUMT00000061002; OTTHUMT00000061003; OTTHUMT00000061004; OTTHUMT00000061005; OTTHUMT00000061006; OTTHUMT00000061007; OTTHUMT00000061008; OTTHUMT00000061009; OTTHUMT000…	SLC6A8	solute carrier family 6 (neurotransmitter transporter), member 8	Multiple_Complex
TC1400007500.hg.1	6,6	7,77	0,12	0,2	T	T	-2,26	6,40E-07	5,05E-05	T	NM_001172; ENST00000261783; ENST00000556491; ENST00000557120; ENST00000557319; BC001350; BC008464; BC029050; OTTHUMT00000415190; OTTHUMT00000415208; OTTHUMT00000415209; OTTHUMT00000415210	ARG2	arginase 2	Multiple_Complex
TC0600012544.hg.1	10,04	8,7	0,18	0,09	T	T	2,53	6,47E-07	5,06E-05	T	NM_021244; ENST00000359203; ENST00000369415; ENST00000492783; BC003088; OTTHUMT00000041484; OTTHUMT00000041485; OTTHUMT00000041486	RRAGD	Ras-related GTP binding D	Multiple_Complex
TC1000006794.hg.1	11,78	13,09	0,2	0,08	T	T	-2,49	6,47E-07	5,06E-05	T	NM_018706; ENST00000263035; ENST00000415935; ENST00000437298; ENST00000448829; ENST00000465617; ENST00000479283; BC002477; BC007955; OTTHUMT00000046777; OTTHUMT00000046778; OTTHUMT00000046779; OTTHUMT00000046780; OTTHUMT00000046781; OTTHUMT00000046782	DHTKD1	dehydrogenase E1 and transketolase domain containing 1	Multiple_Complex
TC0800008783.hg.1	13,76	12,55	0,18	0,17	T	T	2,32	7,14E-07	5,57E-05	T	NM_003129; ENST00000265896; ENST00000518604; ENST00000518931; ENST00000520493; ENST00000521232; ENST00000523430; BC017033; OTTHUMT00000381361; OTTHUMT00000381362; OTTHUMT00000381363; OTTHUMT00000381365; OTTHUMT00000381366; OTTHUMT00000381367	SQLE	squalene epoxidase	Multiple_Complex
TC0600010121.hg.1	14,75	13,65	0,08	0,18	T	T	2,15	7,23E-07	5,62E-05	T	NM_001301085; NM_006775; NM_206853; NM_206854; NM_206855; ENST00000275262; ENST00000361195; ENST00000361752; ENST00000361758; ENST00000392127; ENST00000424802; ENST00000453779; ENST00000537041; ENST00000537124; ENST00000537883; ENST00000540719; ENST00000541696; ENST00000544361; ENST00000544436; ENST00000544823; ENST00000545346; ENST00000545607; BC019917; OTTHUMT00000043016; OTTHUMT00000043017; OT…	QKI	QKI, KH domain containing, RNA binding	Multiple_Complex
TC0800011861.hg.1	8,27	6,67	0,11	0,32	T	T	3,04	7,26E-07	5,62E-05	T	NM_012472; NR_073525; ENST00000250173; ENST00000518101; ENST00000518642; ENST00000519085; ENST00000519595; ENST00000520446; ENST00000521430; ENST00000522584; ENST00000522597; ENST00000522789; ENST00000523503; ENST00000618342; ENST00000620350; BC027589; BC047286; OTTHUMT00000379578; OTTHUMT00000379579; OTTHUMT00000379580; OTTHUMT00000379581; OTTHUMT00000379582; OTTHUMT00000379583; OTTHUMT000003795…	LRRC6	leucine rich repeat containing 6	Multiple_Complex
TC1100009110.hg.1	7,27	5,54	0,32	0,1	T	T	3,32	7,35E-07	5,67E-05	T	NM_006169; ENST00000299964; ENST00000535185; ENST00000535401; ENST00000541090; ENST00000541754; ENST00000542647; ENST00000545255; ENST00000546313; BC000234; OTTHUMT00000398950; OTTHUMT00000398951; OTTHUMT00000398952; OTTHUMT00000398953; OTTHUMT00000398954; OTTHUMT00000398955; OTTHUMT00000398956; OTTHUMT00000398957	NNMT	nicotinamide N-methyltransferase	Multiple_Complex
TC1200007352.hg.1	7,69	5,85	0,24	0,35	T	T	3,59	7,45E-07	5,73E-05	T	NM_198578; ENST00000298910; ENST00000343742; ENST00000416796; ENST00000430804; ENST00000474202; ENST00000479187; ENST00000481256; BC117180; OTTHUMT00000132847; OTTHUMT00000132920; OTTHUMT00000132921; OTTHUMT00000134017; OTTHUMT00000277179; OTTHUMT00000277180; OTTHUMT00000277181	LRRK2	leucine-rich repeat kinase 2	Multiple_Complex
TC0300013852.hg.1	7,31	5,83	0,04	0,27	T	T	2,8	7,62E-07	5,84E-05	T	NM_001271142; NM_001271145; NM_001271146; NM_001271147; NM_001271148; NM_006100; ENST00000265261; ENST00000394162; ENST00000460774; ENST00000462152; ENST00000465004; ENST00000466482; ENST00000468553; ENST00000469105; ENST00000474595; ENST00000476833; ENST00000477574; ENST00000477899; ENST00000480133; ENST00000483910; ENST00000485145; ENST00000485391; ENST00000486249; ENST00000486334; ENST00000489…	ST3GAL6	ST3 beta-galactoside alpha-2,3-sialyltransferase 6	Multiple_Complex
TC0600011956.hg.1	5,47	7,02	0,28	0,18	F	T	-2,92	7,67E-07	5,84E-05	F	NM_001098518; NM_015234; ENST00000265417; ENST00000283296; ENST00000478711; ENST00000498632; BC066121	ADGRF5	adhesion G protein-coupled receptor F5	Multiple_Complex
TC2200007318.hg.1	10,98	12,13	0,02	0,15	T	T	-2,22	7,68E-07	5,84E-05	T	NM_005318; ENST00000340857; BC000145; BC029046; OTTHUMT00000319453	H1F0	H1 histone family, member 0	Multiple_Complex
TC0100008812.hg.1	8,46	6,55	0,35	0,2	T	T	3,76	7,91E-07	5,98E-05	T	NM_000959; NM_001039585; ENST00000370756; ENST00000370757; ENST00000370758; ENST00000497923; BC112965; OTTHUMT00000026582; OTTHUMT00000026583; OTTHUMT00000095325; OTTHUMT00000095326	PTGFR	prostaglandin F receptor (FP)	Coding
TC0X00006686.hg.1	12,39	11,31	0,04	0,14	T	T	2,11	7,90E-07	5,98E-05	T	NM_005314; ENST00000380289; BC074733; OTTHUMT00000055901	GRPR	gastrin-releasing peptide receptor	Coding
TC1600011360.hg.1	4,84	6,82	0,18	0,17	F	T	-3,94	8,07E-07	6,08E-05	F	NM_001308157; NM_016524; ENST00000355377; ENST00000562034; ENST00000562274; ENST00000562711; ENST00000565183; ENST00000566261; ENST00000568115; ENST00000568433; ENST00000570264; BC004518; OTTHUMT00000254286; OTTHUMT00000435873; OTTHUMT00000435874; OTTHUMT00000435875; OTTHUMT00000435876; OTTHUMT00000435877; OTTHUMT00000435878; OTTHUMT00000435880; OTTHUMT00000435881	SYT17	synaptotagmin XVII	Multiple_Complex
TC0900011029.hg.1	7,99	5,16	0,17	0,62	T	F	7,12	8,17E-07	6,12E-05	F	NM_001127610; NM_001701; ENST00000259407; ENST00000395051; BC009567; BC107424; OTTHUMT00000053433; uc010mtd.3	BAAT	bile acid-CoA:amino acid N-acyltransferase	Coding
TC0400010242.hg.1	9,59	7,93	0,25	0,05	T	T	3,17	8,67E-07	6,48E-05	T	NM_013261; ENST00000264867; ENST00000503714; ENST00000505469; ENST00000506055; ENST00000507342; ENST00000507380; ENST00000508380; ENST00000509642; ENST00000509702; ENST00000512169; ENST00000513205; ENST00000514479; ENST00000514494; ENST00000514517; ENST00000515534; ENST00000612355; ENST00000613098; ENST00000617484; OTTHUMT00000214976; OTTHUMT00000360004; OTTHUMT00000360005; OTTHUMT00000360006; OT…	PPARGC1A	peroxisome proliferator-activated receptor gamma, coactivator 1 alpha	Multiple_Complex
TC0200015432.hg.1	8,23	9,48	0,07	0,22	T	T	-2,38	8,72E-07	6,49E-05	T	NM_033066; ENST00000315506; ENST00000359962; ENST00000396886; ENST00000409143; ENST00000409474; ENST00000409818; ENST00000428900; ENST00000447335; ENST00000483841; ENST00000486212; ENST00000602867; ENST00000620095; BC132785; BC144206; OTTHUMT00000335748; OTTHUMT00000335749; OTTHUMT00000335751; OTTHUMT00000335778; OTTHUMT00000335779; OTTHUMT00000335780; OTTHUMT00000335781; OTTHUMT00000335782; OTTH…	MPP4	membrane protein, palmitoylated 4	Multiple_Complex
TC0500009400.hg.1	7,29	5,05	0,09	0,4	T	F	4,73	8,84E-07	6,55E-05	F	NM_001034837; NM_001034838; NM_001278339; NM_001278340; NM_014592; ENST00000328939; ENST00000377360; ENST00000390656; ENST00000411494; ENST00000434108; ENST00000517344; ENST00000518527; ENST00000520740; ENST00000616807; BC050375; OTTHUMT00000252833; OTTHUMT00000371758; OTTHUMT00000371759; OTTHUMT00000371760; OTTHUMT00000371845; OTTHUMT00000371846; OTTHUMT00000371847	KCNIP1	Kv channel interacting protein 1	Multiple_Complex
TC1900012000.hg.1	11,09	10	0,09	0,04	T	T	2,12	8,86E-07	6,55E-05	T	NM_001256658; NM_001256659; NM_001256660; NM_001256661; NM_001256662; NM_003598; ENST00000311227; ENST00000377214; ENST00000539846; ENST00000593945; ENST00000595233; ENST00000596757; ENST00000598397; ENST00000598810; ENST00000598823; ENST00000601519; BC007556; BC051301; OTTHUMT00000465462; OTTHUMT00000465463; OTTHUMT00000465464; OTTHUMT00000465465; OTTHUMT00000465466; OTTHUMT00000465467; OTTHUMT0…	TEAD2	TEA domain family member 2	Multiple_Complex
TC2000007760.hg.1	7,37	4,54	0,56	0,19	T	F	7,11	8,89E-07	6,55E-05	F	NM_001193421; NM_173485; ENST00000329613; ENST00000371497; ENST00000603338; ENST00000605656; ENST00000626626; OTTHUMT00000080398; OTTHUMT00000259177; OTTHUMT00000470818; uc002xwo.3	TSHZ2	teashirt zinc finger homeobox 2	Coding
TC0100012097.hg.1	12,83	14,03	0,09	0,14	T	T	-2,31	8,95E-07	6,57E-05	T	NM_006499; NM_201543; NM_201544; NM_201545; ENST00000238181; ENST00000323938; ENST00000341872; ENST00000352231; ENST00000366583; ENST00000366584; ENST00000406509; ENST00000416919; ENST00000430527; ENST00000434231; ENST00000442397; ENST00000450372; ENST00000454943; ENST00000475670; ENST00000481485; ENST00000489586; ENST00000525042; ENST00000525789; ENST00000526589; ENST00000526634; ENST00000526652…	LGALS8	lectin, galactoside-binding, soluble, 8	Multiple_Complex
TC1200011474.hg.1	11,8	9,91	0,25	0,33	T	T	3,72	9,07E-07	6,64E-05	T	NM_001001323; NM_001682; ENST00000261173; ENST00000359142; ENST00000393164; ENST00000428670; ENST00000549585; ENST00000549727; ENST00000550716; ENST00000551009; ENST00000551310; ENST00000552275; OTTHUMT00000406652; OTTHUMT00000406653; OTTHUMT00000406654; OTTHUMT00000406655; OTTHUMT00000406656; OTTHUMT00000406657; OTTHUMT00000406658; OTTHUMT00000406659; OTTHUMT00000406660	ATP2B1	ATPase, Ca++ transporting, plasma membrane 1	Multiple_Complex
TC0100011267.hg.1	14,22	12,66	0,24	0,19	T	T	2,96	9,15E-07	6,67E-05	T	NM_001001396; NM_001684; ENST00000341360; ENST00000356729; ENST00000357681; ENST00000367218; ENST00000458092; ENST00000466407; ENST00000484746; BC140774; BC150293; OTTHUMT00000087462; OTTHUMT00000087463; OTTHUMT00000087464; OTTHUMT00000087465; OTTHUMT00000098774; OTTHUMT00000098775	ATP2B4	ATPase, Ca++ transporting, plasma membrane 4	Multiple_Complex
TC0800008120.hg.1	9,28	8,11	0,02	0,17	T	T	2,25	9,24E-07	6,71E-05	T	NM_033402; ENST00000360375; ENST00000414626; ENST00000517875; ENST00000522567; ENST00000522770; ENST00000523669; BC030701; OTTHUMT00000380267; OTTHUMT00000380268; OTTHUMT00000380269; OTTHUMT00000380270; OTTHUMT00000380271; OTTHUMT00000380272	LRRCC1	leucine rich repeat and coiled-coil centrosomal protein 1	Multiple_Complex
TC0400007306.hg.1	8,01	9,25	0,13	0,12	T	T	-2,37	9,30E-07	6,73E-05	T	NM_018177; ENST00000261435; ENST00000511480; ENST00000513269; ENST00000515550; BC126466; OTTHUMT00000250458; OTTHUMT00000361282; OTTHUMT00000361283; OTTHUMT00000361284	N4BP2	NEDD4 binding protein 2	Multiple_Complex
TC1900011774.hg.1	15,39	14,28	0,05	0,07	T	T	2,16	9,32E-07	6,73E-05	T	NM_001425; ENST00000270221; ENST00000593437; ENST00000594198; ENST00000596315; ENST00000597057; ENST00000597279; ENST00000597529; ENST00000599255; BC009718; OTTHUMT00000465613; OTTHUMT00000465614; OTTHUMT00000465615; OTTHUMT00000465616; OTTHUMT00000465617; OTTHUMT00000465618; OTTHUMT00000465619; OTTHUMT00000465620	EMP3	epithelial membrane protein 3	Multiple_Complex
TC1200011246.hg.1	8,54	6,49	0,35	0,21	T	T	4,14	9,74E-07	7,01E-05	T	NM_001207015; NM_001207016; NM_002849; NM_130846; NR_073474; ENST00000283228; ENST00000342084; ENST00000378778; ENST00000440835; ENST00000537619; ENST00000547752; ENST00000548220; ENST00000549107; ENST00000549308; ENST00000550661; ENST00000551219; BC110900; BC119777; BC122866; OTTHUMT00000404481; OTTHUMT00000404482; OTTHUMT00000404483; OTTHUMT00000404484; OTTHUMT00000404485; OTTHUMT00000404486; O…	PTPRR	protein tyrosine phosphatase, receptor type, R	Multiple_Complex
TC0100009558.hg.1	10,57	8,71	0,23	0,29	T	T	3,62	9,81E-07	7,04E-05	T	NM_020440; ENST00000393203; ENST00000496699; ENST00000497385; BC152454; OTTHUMT00000033271; OTTHUMT00000033272; OTTHUMT00000033273	PTGFRN	prostaglandin F2 receptor inhibitor	Multiple_Complex
TC0800009872.hg.1	9,86	11,31	0,07	0,12	T	T	-2,73	9,99E-07	7,12E-05	T	NM_003840; ENST00000312584; BC052270; OTTHUMT00000215135	TNFRSF10D	tumor necrosis factor receptor superfamily, member 10d, decoy with truncated death domain	Coding
TC1200012639.hg.1	7,94	6,3	0,31	0,24	T	T	3,13	9,96E-07	7,12E-05	T	NM_004503; NM_014620; NM_018953; NM_153633; NM_153693; NR_003084; ENST00000243108; ENST00000303406; ENST00000312492; ENST00000394331; ENST00000430889; ENST00000507650; BC050442; BC074844; BC074845; OTTHUMT00000358943; OTTHUMT00000358944; OTTHUMT00000358947; OTTHUMT00000358963; OTTHUMT00000358964; OTTHUMT00000358965; uc001sex.3	HOXC6; HOXC4; HOXC5	homeobox C6; homeobox C4; homeobox C5	Multiple_Complex
TC0200008801.hg.1	11,74	13,28	0,2	0,11	T	T	-2,9	1,01E-06	7,18E-05	T	NM_006588; ENST00000272452; ENST00000409309; ENST00000494122; BC125043; OTTHUMT00000253561; OTTHUMT00000330145; OTTHUMT00000330146	SULT1C4	sulfotransferase family 1C member 4	Multiple_Complex
TC0100012921.hg.1	10,75	11,71	0,03	0,05	T	T	-1,94	1,02E-06	7,21E-05	T	NM_004753; NR_106788; ENST00000430996; ENST00000464917; ENST00000482265; ENST00000616661; ENST00000622213; BC002730; OTTHUMT00000005318; OTTHUMT00000005319; OTTHUMT00000005320; OTTHUMT00000005321	DHRS3; MIR6730	dehydrogenase/reductase (SDR family) member 3; microRNA 6730	Multiple_Complex
TC1200012745.hg.1	9,71	8,21	0,1	0,26	T	T	2,83	1,02E-06	7,22E-05	T	NM_001297640; NM_001297642; NM_001297643; NM_016546; ENST00000266542; ENST00000504702; ENST00000534950; ENST00000534969; ENST00000537833; ENST00000539927; ENST00000543933; ENST00000543941; ENST00000544702; ENST00000545280; ENST00000545337; OTTHUMT00000398366; OTTHUMT00000398367; OTTHUMT00000398368; OTTHUMT00000398370; OTTHUMT00000398371; OTTHUMT00000398372; OTTHUMT00000398373; OTTHUMT00000398374;…	C1RL	complement component 1, r subcomponent-like	Multiple_Complex
TC0100014191.hg.1	11,94	12,97	0,11	0,09	T	T	-2,05	1,03E-06	7,22E-05	T	NM_002867; ENST00000371655; BC005035; OTTHUMT00000023816; uc001cth.3	RAB3B	RAB3B, member RAS oncogene family	Multiple_Complex
TC0100008594.hg.1	12,09	10,56	0,13	0,17	T	T	2,89	1,03E-06	7,24E-05	T	NM_001083592; NM_005012; ENST00000371079; ENST00000371080; ENST00000482426; ENST00000545203; OTTHUMT00000025002; OTTHUMT00000025003; OTTHUMT00000025004	ROR1	receptor tyrosine kinase-like orphan receptor 1	Multiple_Complex
TC0300008904.hg.1	9,89	8,8	0,1	0,1	T	T	2,12	1,05E-06	7,33E-05	T	NM_001190447; NM_002718; NM_181897; ENST00000264977; ENST00000334546; ENST00000447251; ENST00000469270; ENST00000490467; BC065531; OTTHUMT00000357232; OTTHUMT00000357233; OTTHUMT00000357234; OTTHUMT00000357235; OTTHUMT00000357236	PPP2R3A	protein phosphatase 2, regulatory subunit B, alpha	Multiple_Complex
TC0300008999.hg.1	14,32	13,17	0,06	0,1	T	T	2,22	1,05E-06	7,33E-05	T	NM_001080412; ENST00000321464; ENST00000441582; ENST00000503809; ENST00000504673; ENST00000506623; ENST00000507657; ENST00000507722; ENST00000509813; ENST00000509842; ENST00000509883; ENST00000510338; ENST00000510726; ENST00000512276; ENST00000512327; ENST00000512769; ENST00000513249; ENST00000513258; ENST00000513570; ENST00000513619; ENST00000514251; OTTHUMT00000359329; OTTHUMT00000359330; OTTHU…	ZBTB38	zinc finger and BTB domain containing 38	Multiple_Complex
TC0700006984.hg.1	9,8	8,44	0,13	0,15	T	T	2,57	1,06E-06	7,36E-05	T	NM_001199835; NM_001199837; NM_001199838; NM_013322; NR_037670; ENST00000338523; ENST00000396376; ENST00000409367; ENST00000409838; ENST00000412416; ENST00000416246; ENST00000446848; ENST00000462993; ENST00000619420; BC031050; BC034992; OTTHUMT00000214119; OTTHUMT00000214120; OTTHUMT00000327997; OTTHUMT00000327998; OTTHUMT00000327999; OTTHUMT00000328000; OTTHUMT00000328001	SNX10	sorting nexin 10	Multiple_Complex
TC1200012835.hg.1	12,88	11,78	0,1	0,05	T	T	2,13	1,07E-06	7,38E-05	T	NM_001031701; ENST00000392876; ENST00000415849; ENST00000465502; ENST00000474268; BC052293; OTTHUMT00000347118; OTTHUMT00000347120; OTTHUMT00000347121; OTTHUMT00000347122	NT5DC3	5-nucleotidase domain containing 3	Multiple_Complex
TC0500012394.hg.1	8	6,79	0,12	0,17	T	T	2,31	1,10E-06	7,54E-05	T	NM_206966; ENST00000318315; ENST00000510432; ENST00000515291; BC021680; OTTHUMT00000373313; OTTHUMT00000373314; OTTHUMT00000373315	C5orf46	chromosome 5 open reading frame 46	Multiple_Complex
TC1200011811.hg.1	9,88	8,57	0,09	0,16	T	T	2,47	1,09E-06	7,54E-05	T	NM_001033050; NM_025198; ENST00000240050; ENST00000392830; ENST00000547115; ENST00000548101; ENST00000550496; ENST00000550736; ENST00000552029; BC025984; BC036066	MTERF2	mitochondrial transcription termination factor 2	Multiple_Complex
TC1400007227.hg.1	11,6	10,1	0,16	0,12	T	T	2,82	1,10E-06	7,54E-05	T	NM_001177388; NM_002306; NR_003225; ENST00000254301; ENST00000553493; ENST00000553755; ENST00000554715; ENST00000556263; ENST00000556322; ENST00000556438; BC001120; BC053667; BC068068; OTTHUMT00000411308; OTTHUMT00000411309; OTTHUMT00000411310; OTTHUMT00000411311; OTTHUMT00000411312; OTTHUMT00000411313; OTTHUMT00000411314	LGALS3	lectin, galactoside-binding, soluble, 3	Multiple_Complex
TC1600008034.hg.1	6,45	5,23	0,2	0,06	T	F	2,32	1,10E-06	7,54E-05	F	NM_001130487; NM_001242833; NM_001242834; NM_001242835; NM_001242836; NM_020465; NM_022910; NR_040072; ENST00000258187; ENST00000356752; ENST00000394279; ENST00000394282; ENST00000421602; ENST00000561681; ENST00000561720; ENST00000561724; ENST00000561730; ENST00000561738; ENST00000561779; ENST00000562350; ENST00000562725; ENST00000562731; ENST00000562764; ENST00000562930; ENST00000562999; ENST000…	NDRG4	NDRG family member 4	Multiple_Complex
TC1100012755.hg.1	12,48	10,79	0,35	0,15	T	T	3,23	1,12E-06	7,64E-05	T	hsa_circ_0008111	KIRREL3	Jeck2013 ALT_ACCEPTOR, ALT_DONOR, coding, INTERNAL, intronic best transcript NM_032531	NonCoding
TC1000007641.hg.1	14,73	13,7	0,04	0,11	T	T	2,04	1,13E-06	7,69E-05	T	NM_012242; ENST00000373970; ENST00000467359; ENST00000476752; ENST00000494277; BC001539; OTTHUMT00000048098; OTTHUMT00000048099; OTTHUMT00000048100; OTTHUMT00000048101	DKK1	dickkopf WNT signaling pathway inhibitor 1	Multiple_Complex
TC0300014095.hg.1	7,66	9,06	0,19	0,04	T	T	-2,64	1,15E-06	7,72E-05	T	NM_001204897; NM_001204898; NM_138461; ENST00000273695; ENST00000440822; ENST00000446879; ENST00000454715; BC146985; BC146993; BC147021; BC171870; OTTHUMT00000341174; OTTHUMT00000341175; OTTHUMT00000341177; OTTHUMT00000341178	TM4SF19	transmembrane 4 L six family member 19	Multiple_Complex
TC1600010711.hg.1	11,41	12,34	0,1	0,02	T	T	-1,9	1,15E-06	7,72E-05	T	NM_001039690; NM_001040146; NR_033227; ENST00000306585; ENST00000398235; ENST00000448552; ENST00000518041; ENST00000519520; ENST00000519534; ENST00000520529; ENST00000522091; ENST00000522497; ENST00000523421; ENST00000567763; BC018700; OTTHUMT00000376352; OTTHUMT00000376639; OTTHUMT00000376640; OTTHUMT00000376641; OTTHUMT00000376642; OTTHUMT00000376643; OTTHUMT00000376644; OTTHUMT00000376645; OTT…	CHTF8	chromosome transmission fidelity factor 8	Multiple_Complex
TSUnmapped00000088.hg.1	9,55	7,82	0,17	0,33	T	T	3,3	1,15E-06	7,72E-05	T	ENST00000626461	DUSP16	dual specificity phosphatase 16	Coding
TC0300009139.hg.1	7,11	8,61	0,13	0,35	T	T	-2,83	1,18E-06	7,80E-05	T	NM_004617; ENST00000305354; ENST00000463068; ENST00000465758; BC001386; OTTHUMT00000356528; OTTHUMT00000356529; OTTHUMT00000356530	TM4SF4	transmembrane 4 L six family member 4	Multiple_Complex
TC0X00007777.hg.1	12,15	13,65	0,23	0,17	T	T	-2,83	1,16E-06	7,80E-05	T	NM_198450; ENST00000373173; ENST00000613473; ENST00000622540; BC107096; OTTHUMT00000057385	APOOL	apolipoprotein O-like	Multiple_Complex
TC1500010369.hg.1	13,16	11,98	0,14	0,15	T	T	2,26	1,17E-06	7,80E-05	T	NM_001114614; NM_001310319; NM_001310320; NM_001310321; NM_005928; ENST00000268150; ENST00000268151; ENST00000542878; ENST00000557944; ENST00000558018; ENST00000558029; ENST00000558352; ENST00000558773; ENST00000559143; ENST00000559259; ENST00000559770; ENST00000559997; ENST00000560553; ENST00000560937; ENST00000566497; ENST00000613965; ENST00000617199; BC003610; OTTHUMT00000309072; OTTHUMT000004…	MFGE8	milk fat globule-EGF factor 8 protein	Multiple_Complex
TC1900006561.hg.1	8,49	7,02	0,05	0,31	T	T	2,78	1,17E-06	7,80E-05	T	NM_079834; NM_138422; ENST00000316097; ENST00000329478; ENST00000409472; ENST00000411971; ENST00000414057; ENST00000452128; ENST00000454697; ENST00000460767; ENST00000472442; ENST00000489554; ENST00000585335; ENST00000588555; ENST00000588907; ENST00000590266; ENST00000621748; BC011747; BC011824; BC016509; BC062598; OTTHUMT00000336210; OTTHUMT00000336211; OTTHUMT00000336213; OTTHUMT00000336214; OT…	SCAMP4; ADAT3	secretory carrier membrane protein 4; adenosine deaminase, tRNA-specific 3	Multiple_Complex
TC2000007704.hg.1	12,27	13,23	0,09	0,03	T	T	-1,95	1,18E-06	7,80E-05	T	NM_032521; ENST00000371610; ENST00000396039; BC060847; OTTHUMT00000079697; OTTHUMT00000258383; uc002xvo.3	PARD6B	par-6 family cell polarity regulator beta	Multiple_Complex
TC2000009292.hg.1	13,28	14,34	0,13	0,07	T	T	-2,08	1,20E-06	7,89E-05	T	NM_001281769; NM_001281771; NM_001281772; NM_001281773; NM_001281774; NM_001281775; NM_001281776; NM_001281777; NM_001281778; NM_001281779; NM_001281780; NM_001281781; NM_001281782; NM_001281783; NM_001281784; NM_012408; NM_183047; NM_183048; ENST00000262975; ENST00000311275; ENST00000352431; ENST00000355972; ENST00000360911; ENST00000372023; ENST00000396281; ENST00000435836; ENST00000441977; ENS…	ZMYND8	zinc finger, MYND-type containing 8	Multiple_Complex
TC0200008464.hg.1	9,1	6,98	0,27	0,38	T	T	4,35	1,24E-06	8,14E-05	T	NM_001034914; NM_013434; ENST00000295225; ENST00000360990; ENST00000377181; ENST00000461336; ENST00000468529; ENST00000475491; ENST00000486055; BC012850; OTTHUMT00000252770; OTTHUMT00000338588; OTTHUMT00000338589; OTTHUMT00000338590; OTTHUMT00000338591; OTTHUMT00000338592	KCNIP3	Kv channel interacting protein 3, calsenilin	Multiple_Complex
TC0100014566.hg.1	10,44	11,45	0,08	0,09	T	T	-2,02	1,25E-06	8,17E-05	T	NM_030816; ENST00000262346; ENST00000370944; ENST00000464236; ENST00000490846; ENST00000498735; BC028840; OTTHUMT00000025903; OTTHUMT00000025904; OTTHUMT00000025905; OTTHUMT00000025906; OTTHUMT00000092212	ANKRD13C	ankyrin repeat domain 13C	Multiple_Complex
TC1500007695.hg.1	11,72	12,73	0,11	0,04	T	T	-2	1,27E-06	8,31E-05	T	NM_001104554; NM_017705; ENST00000340965; ENST00000395407; ENST00000558684; ENST00000561027; ENST00000561153; ENST00000561250; BC039234; OTTHUMT00000257126; OTTHUMT00000416670; OTTHUMT00000416671; OTTHUMT00000416672; OTTHUMT00000416784	PAQR5	progestin and adipoQ receptor family member V	Multiple_Complex
TC0800008243.hg.1	14,21	13,18	0,05	0,03	T	T	2,05	1,33E-06	8,62E-05	T	NM_001161779; NM_001161780; NM_001161781; NM_018444; ENST00000297598; ENST00000396200; ENST00000517764; ENST00000518107; ENST00000518573; ENST00000518827; ENST00000520614; ENST00000520728; ENST00000521144; ENST00000523021; BC047619; BC098343; OTTHUMT00000378414; OTTHUMT00000378415; OTTHUMT00000378416; OTTHUMT00000378418; OTTHUMT00000378438; OTTHUMT00000378439; OTTHUMT00000378440; OTTHUMT000003784…	PDP1	pyruvate dehyrogenase phosphatase catalytic subunit 1	Multiple_Complex
TC1700012439.hg.1	8,28	6,84	0,17	0,26	T	T	2,72	1,32E-06	8,62E-05	T	NM_001305544; NM_001305545; NM_017763; ENST00000407977; ENST00000577625; ENST00000577716; ENST00000580014; ENST00000581868; ENST00000582293; ENST00000583753; ENST00000584437; BC109028; OTTHUMT00000444711; OTTHUMT00000444712; OTTHUMT00000444713; OTTHUMT00000444714; OTTHUMT00000444715; OTTHUMT00000444716; OTTHUMT00000444717; OTTHUMT00000444718	RNF43	ring finger protein 43	Multiple_Complex
TC0700006727.hg.1	11,16	10,07	0,09	0,2	T	T	2,13	1,35E-06	8,75E-05	T	NM_001134232; NM_018374; ENST00000396667; ENST00000396668; ENST00000420833; ENST00000442107; ENST00000444443; ENST00000453686; ENST00000462754; ENST00000492762; BC033901; BC039741; OTTHUMT00000246870; OTTHUMT00000325798; OTTHUMT00000325799; OTTHUMT00000325865; OTTHUMT00000325866; OTTHUMT00000325867; OTTHUMT00000325868; OTTHUMT00000325869	TMEM106B	transmembrane protein 106B	Multiple_Complex
TC1300009954.hg.1	13,66	12,74	0,02	0,08	T	T	1,88	1,35E-06	8,75E-05	T	NM_013238; ENST00000379221; ENST00000474320; BC010910; BC095400; OTTHUMT00000044709; OTTHUMT00000044710	DNAJC15	DnaJ (Hsp40) homolog, subfamily C, member 15	Multiple_Complex
TC1900007819.hg.1	11,63	10,62	0,1	0,07	T	T	2,01	1,36E-06	8,76E-05	T	NM_001012320; NM_001289181; NM_001289182; NM_001289183; NM_001289184; NM_001289185; NM_001289186; NM_001289187; NM_001289188; NM_001289189; NM_001289190; NM_001289191; NM_001289192; NM_018443; NM_018675; NR_110322; ENST00000423823; ENST00000446502; ENST00000457781; ENST00000502743; ENST00000505163; ENST00000505242; ENST00000505365; ENST00000506901; ENST00000507959; ENST00000509196; ENST0000050952…	ZNF302	zinc finger protein 302	Multiple_Complex
TC0100008938.hg.1	12,24	11,11	0,11	0,17	T	T	2,19	1,44E-06	9,16E-05	T	NM_006769; ENST00000370542; ENST00000370544; ENST00000489303; ENST00000495705; BC003600; BC017673; BC065818; OTTHUMT00000028264; OTTHUMT00000028265; OTTHUMT00000028266; OTTHUMT00000028267	LMO4	LIM domain only 4	Multiple_Complex
TC0600014348.hg.1	10,52	11,54	0,13	0,04	T	T	-2,03	1,43E-06	9,16E-05	T	NM_001144060; NM_020464; ENST00000342260; ENST00000343505; ENST00000426841; ENST00000427025; ENST00000468095; ENST00000479393; ENST00000533765; ENST00000534376; OTTHUMT00000043700; OTTHUMT00000043701; OTTHUMT00000043703; OTTHUMT00000043704; OTTHUMT00000395465; OTTHUMT00000395466; OTTHUMT00000395467; OTTHUMT00000395468	NHSL1	NHS-like 1	Multiple_Complex
TC1700010504.hg.1	11,42	12,46	0,16	0,06	T	T	-2,06	1,43E-06	9,16E-05	T	NM_000458; NM_001165923; NM_001304286; ENST00000613727; ENST00000614313; ENST00000617272; ENST00000617811; ENST00000618894; ENST00000620125; ENST00000621123; BC017714; OTTHUMT00000477393; OTTHUMT00000477394; OTTHUMT00000477395; OTTHUMT00000477396; OTTHUMT00000477397	HNF1B	HNF1 homeobox B	Multiple_Complex
TC0400007857.hg.1	7,48	8,79	0,14	0,17	T	T	-2,48	1,46E-06	9,31E-05	T	NM_001657; ENST00000395748; ENST00000502307; ENST00000511560; BC009799; BC146953; BC146967; OTTHUMT00000252277; OTTHUMT00000362727; OTTHUMT00000362728	AREG	amphiregulin	Multiple_Complex
TC1500010880.hg.1	10,58	11,52	0,07	0,08	T	T	-1,93	1,49E-06	9,46E-05	T	NM_001289986; NM_017858; ENST00000261881; ENST00000566524; BC000870; OTTHUMT00000256897; OTTHUMT00000420717	TIPIN	TIMELESS interacting protein	Multiple_Complex
TC0200014361.hg.1	10,71	9,62	0,07	0,2	T	T	2,12	1,52E-06	9,59E-05	T	NM_001077427; NM_144586; ENST00000345008; ENST00000397463; ENST00000449209; BC017318; BC040046; OTTHUMT00000331821; OTTHUMT00000331822; OTTHUMT00000331956	LYPD1	LY6/PLAUR domain containing 1	Coding
TC1100011888.hg.1	14,82	13,78	0,07	0,1	T	T	2,04	1,52E-06	9,59E-05	T	NM_001114173; NM_001814; NM_148170; ENST00000227266; ENST00000393301; ENST00000524463; ENST00000527018; ENST00000528020; ENST00000529974; ENST00000533865; ENST00000533897; ENST00000534131; OTTHUMT00000394019; OTTHUMT00000394020; OTTHUMT00000394021; OTTHUMT00000394022; OTTHUMT00000394023; OTTHUMT00000394024; OTTHUMT00000394025; OTTHUMT00000394026; OTTHUMT00000394028	CTSC	cathepsin C	Multiple_Complex
TC0100014585.hg.1	9,5	10,67	0,1	0,21	T	T	-2,24	1,56E-06	9,80E-05	T	NM_173808; ENST00000306821; ENST00000357731; ENST00000434200; ENST00000467479; ENST00000474357; ENST00000478526; BC036771; OTTHUMT00000026722; OTTHUMT00000026723; OTTHUMT00000026849; OTTHUMT00000026850; OTTHUMT00000026851	NEGR1	neuronal growth regulator 1	Multiple_Complex
TC0200007446.hg.1	8,93	9,97	0,1	0,05	T	T	-2,06	1,56E-06	9,81E-05	T	NM_005400; ENST00000306156; ENST00000394874; ENST00000421201; ENST00000462720; ENST00000467135; ENST00000469753; ENST00000472021; ENST00000476675; ENST00000480453; ENST00000480633; ENST00000485176; ENST00000489067; ENST00000494472; ENST00000497602; ENST00000498388; BC109033; BC109034; OTTHUMT00000250751; OTTHUMT00000258143; OTTHUMT00000258144; OTTHUMT00000258145; OTTHUMT00000258147; OTTHUMT000002…	PRKCE	protein kinase C, epsilon	Multiple_Complex
TC1600010596.hg.1	13,58	14,52	0,05	0,04	T	T	-1,93	1,58E-06	9,91E-05	T	NM_001286157; NM_006141; ENST00000258198; ENST00000440564; ENST00000443351; ENST00000561727; ENST00000563628; ENST00000564090; ENST00000564559; ENST00000564833; ENST00000565532; ENST00000566150; ENST00000567499; ENST00000568180; ENST00000568453; ENST00000569320; ENST00000570201; BC025959; OTTHUMT00000268846; OTTHUMT00000421033; OTTHUMT00000421034; OTTHUMT00000421035; OTTHUMT00000421036; OTTHUMT00…	DYNC1LI2	dynein, cytoplasmic 1, light intermediate chain 2	Multiple_Complex
TC0400011440.hg.1	14,09	13,14	0,09	0,02	T	T	1,93	1,63E-06	0,0001	T	NM_000944; NM_001130691; NM_001130692; ENST00000323055; ENST00000394853; ENST00000394854; ENST00000492351; ENST00000507176; ENST00000510292; ENST00000512215; ENST00000525819; ENST00000529324; BC025714; OTTHUMT00000258379; OTTHUMT00000258380; OTTHUMT00000258381; OTTHUMT00000363383; OTTHUMT00000363384; OTTHUMT00000363386; OTTHUMT00000363388; OTTHUMT00000388904; OTTHUMT00000388905	PPP3CA	protein phosphatase 3, catalytic subunit, alpha isozyme	Multiple_Complex
TC0X00007919.hg.1	9,52	8,08	0,25	0,03	T	T	2,71	1,63E-06	0,0001	T	NM_014467; ENST00000373004; ENST00000481988; BC020733; OTTHUMT00000057486; OTTHUMT00000057487	SRPX2	sushi-repeat containing protein, X-linked 2	Multiple_Complex
TC2000008023.hg.1	5,96	8,37	0,36	0,27	T	T	-5,32	1,63E-06	0,0001	T	NM_016354; ENST00000217159; ENST00000370507; ENST00000451793; ENST00000466818; ENST00000466961; ENST00000470412; ENST00000495889; ENST00000497209; ENST00000497919; BC015727; OTTHUMT00000080043; OTTHUMT00000080044; OTTHUMT00000080045; OTTHUMT00000080046; OTTHUMT00000080047; OTTHUMT00000080048; OTTHUMT00000080049; OTTHUMT00000080050; uc002ydb.1	SLCO4A1	solute carrier organic anion transporter family, member 4A1	Multiple_Complex
TC0200012656.hg.1	8,3	6,88	0,2	0,18	T	T	2,68	1,65E-06	0,0001	T	NM_001039348; NM_001039349; ENST00000355426; ENST00000394555; ENST00000421664; ENST00000424207; ENST00000429909; ENST00000438672; ENST00000439193; ENST00000440439; ENST00000452161; ENST00000452337; ENST00000480016; ENST00000497698; BC014410; BC098561; OTTHUMT00000251491; OTTHUMT00000324899; OTTHUMT00000324900; OTTHUMT00000324901; OTTHUMT00000324902; OTTHUMT00000324903; OTTHUMT00000324904; OTTHUMT…	EFEMP1	EGF containing fibulin-like extracellular matrix protein 1	Multiple_Complex
TC0600007301.hg.1	10,83	9,52	0,04	0,07	T	T	2,48	1,74E-06	0,0001	T	NM_001197246; NM_001197247; NM_001197248; NM_001197249; NM_007047; ENST00000356386; ENST00000377708; ENST00000396934; ENST00000396948; ENST00000508906; ENST00000524459; ENST00000524682; ENST00000527417; ENST00000527422; ENST00000527639; ENST00000528222; ENST00000528541; ENST00000530653; ENST00000531055; ENST00000532294; ENST00000532627; ENST00000532865; ENST00000532994; ENST00000604202; BC002832;…	BTN3A2	butyrophilin, subfamily 3, member A2	Multiple_Complex
TC0200007261.hg.1	13,33	12,35	0,02	0,14	T	T	1,98	1,75E-06	0,0001	T	NM_012413; ENST00000338415; ENST00000404976; ENST00000444022; ENST00000469098; ENST00000470075; ENST00000480050; BC036721; BC047756; OTTHUMT00000218572; OTTHUMT00000326530; OTTHUMT00000326531; OTTHUMT00000326532; OTTHUMT00000326533; OTTHUMT00000326534	QPCT	glutaminyl-peptide cyclotransferase	Multiple_Complex
TC1200006730.hg.1	9,63	7,69	0,12	0,28	T	T	3,83	1,80E-06	0,0001	T	NM_001297776; NM_020734; NR_123740; ENST00000299673; ENST00000357529; ENST00000504495; ENST00000510357; ENST00000535829; ENST00000537189; ENST00000538135; ENST00000538758; ENST00000539923; ENST00000541044; ENST00000542232; ENST00000544257; ENST00000619374; BC033793; OTTHUMT00000398711; OTTHUMT00000398712; OTTHUMT00000398713; OTTHUMT00000398870; OTTHUMT00000398871; OTTHUMT00000398872; OTTHUMT00000…	RIMKLB	ribosomal modification protein rimK-like family member B	Multiple_Complex
TC0X00009341.hg.1	8,17	7,01	0,02	0,16	T	T	2,23	1,82E-06	0,0001	T	NM_000109; NM_004006; NM_004009; NM_004010; NM_004011; NM_004012; NM_004013; NM_004014; NM_004015; NM_004016; NM_004017; NM_004018; NM_004019; NM_004020; NM_004021; NM_004022; NM_004023; ENST00000288447; ENST00000343523; ENST00000357033; ENST00000358062; ENST00000359836; ENST00000361471; ENST00000378677; ENST00000378680; ENST00000378702; ENST00000378705; ENST00000378707; ENST00000378723; ENST0000…	DMD	dystrophin	Multiple_Complex
TC1200010006.hg.1	11,9	10,85	0,12	0,04	T	T	2,08	1,82E-06	0,0001	T	NM_024829; ENST00000240617; ENST00000540572; ENST00000541618; ENST00000541800; BC063561; OTTHUMT00000401203; OTTHUMT00000401204; OTTHUMT00000401493; OTTHUMT00000401514	PLBD1	phospholipase B domain containing 1	Multiple_Complex
TC1600007952.hg.1	11,22	12,49	0,16	0,05	T	T	-2,4	1,85E-06	0,0001	T	NM_018233; ENST00000336111; ENST00000561646; ENST00000562150; ENST00000563733; ENST00000565209; ENST00000565682; ENST00000566157; ENST00000568172; ENST00000568397; ENST00000569645; ENST00000569802; BC032919; OTTHUMT00000256976; OTTHUMT00000434741; OTTHUMT00000434742; OTTHUMT00000434743; OTTHUMT00000434744; OTTHUMT00000434745; OTTHUMT00000434746; OTTHUMT00000434747; OTTHUMT00000434748; OTTHUMT0000…	OGFOD1	2-oxoglutarate and iron-dependent oxygenase domain containing 1	Multiple_Complex
TC1400007120.hg.1	7,08	8,43	0,07	0,26	T	T	-2,55	1,92E-06	0,0001	T	NM_001127713; NM_015915; NM_181598; ENST00000358385; ENST00000441560; ENST00000553509; ENST00000553746; ENST00000554886; ENST00000555266; ENST00000555960; ENST00000556067; ENST00000556478; ENST00000557735; BC010708; OTTHUMT00000276884; OTTHUMT00000410924; OTTHUMT00000410925; OTTHUMT00000410926; OTTHUMT00000410927; OTTHUMT00000410928; OTTHUMT00000410929; OTTHUMT00000410930; OTTHUMT00000410931; OTT…	ATL1	atlastin GTPase 1	Multiple_Complex
TC0800008235.hg.1	12,17	11,25	0,01	0,07	T	T	1,89	1,92E-06	0,0001	T	NM_001283034; NM_145269; NR_104267; NR_104268; ENST00000359421; ENST00000423990; ENST00000452913; ENST00000517718; ENST00000518116; ENST00000518322; ENST00000518829; ENST00000519135; ENST00000519679; ENST00000520363; ENST00000520937; ENST00000520955; ENST00000521641; ENST00000522324; ENST00000522803; ENST00000523453; ENST00000523475; ENST00000523577; ENST00000620645; OTTHUMT00000377889; OTTHUMT00…	FAM92A1	family with sequence similarity 92, member A1	Multiple_Complex
TC0500008454.hg.1	7,77	8,94	0,11	0,17	T	T	-2,25	1,94E-06	0,0001	T	NM_001300783; NM_001308087; NM_001308088; NM_016644; ENST00000379551; ENST00000407149; ENST00000446965; ENST00000505123; ENST00000509923; BC038838; BC092474; OTTHUMT00000250867; OTTHUMT00000371059; OTTHUMT00000371060; OTTHUMT00000371061	PRR16	proline rich 16	Multiple_Complex
TC1100010905.hg.1	8,42	7,31	0,08	0,04	T	T	2,15	1,95E-06	0,0001	T	NM_153450; ENST00000337672; ENST00000431606; ENST00000528205; ENST00000534677; BC037223; OTTHUMT00000393701; OTTHUMT00000393702; OTTHUMT00000393703; OTTHUMT00000393704	MED19	mediator complex subunit 19	Multiple_Complex
TC1200012610.hg.1	10,48	8,95	0,25	0,15	T	T	2,89	1,96E-06	0,0001	T	NM_001135823; NM_005086; ENST00000242729; ENST00000422622; ENST00000535504; ENST00000544231; BC062299; OTTHUMT00000402653; OTTHUMT00000402654; OTTHUMT00000402720; OTTHUMT00000402722	SSPN	sarcospan	Multiple_Complex
TC2000009522.hg.1	12,86	14,02	0,12	0,03	T	T	-2,25	1,97E-06	0,0001	T	NM_000782; NM_001128915; ENST00000216862; ENST00000395954; ENST00000395955; ENST00000460643; ENST00000472970; ENST00000487593; BC109083; BC109084	CYP24A1	cytochrome P450, family 24, subfamily A, polypeptide 1	Multiple_Complex
TC0500007337.hg.1	9,26	8,12	0,05	0,14	T	T	2,2	1,99E-06	0,0001	T	NM_001178055; NM_001178056; NM_024615; ENST00000281631; ENST00000502524; ENST00000503046; ENST00000503193; ENST00000503561; ENST00000503665; ENST00000503707; ENST00000503750; ENST00000503790; ENST00000503888; ENST00000505180; ENST00000505554; ENST00000505697; ENST00000507812; ENST00000510040; ENST00000510303; ENST00000511363; ENST00000513414; ENST00000513738; ENST00000514067; ENST00000514342; ENS…	PARP8	poly(ADP-ribose) polymerase family member 8	Multiple_Complex
TC0600007748.hg.1	13,42	14,57	0,24	0,06	T	T	-2,22	1,99E-06	0,0001	T	NM_002131; NM_145899; NM_145901; NM_145902; NM_145903; NM_145905; ENST00000311487; ENST00000347617; ENST00000374116; ENST00000401473; ENST00000447654; ENST00000478214; BC004924; BC008832; BC015789; BC063434; BC067083; BC071863; BC071864; OTTHUMT00000040214; OTTHUMT00000040215; OTTHUMT00000040216; OTTHUMT00000040217	HMGA1	high mobility group AT-hook 1	Multiple_Complex
TC0700009977.hg.1	8,28	6,97	0,2	0,21	T	F	2,48	2,04E-06	0,0001	F	NM_002607; NM_033023; ENST00000354513; ENST00000400761; ENST00000402802; ENST00000405692; ENST00000426681; ENST00000482462	PDGFA	platelet-derived growth factor alpha polypeptide	Multiple_Complex
TC1700009079.hg.1	7,92	6,36	0,28	0,11	T	T	2,95	2,06E-06	0,0001	T	NM_030968; NM_153372; NM_198593; NM_198594; NR_049769; ENST00000311661; ENST00000339142; ENST00000354124; ENST00000392445; ENST00000578229; ENST00000579760; ENST00000580454; ENST00000580474; ENST00000581774; ENST00000582295; ENST00000582625; ENST00000583904; BC021553; OTTHUMT00000437385; OTTHUMT00000437386; OTTHUMT00000437387; OTTHUMT00000437388; OTTHUMT00000437389; OTTHUMT00000437394; OTTHUMT000…	C1QTNF1	C1q and tumor necrosis factor related protein 1	Multiple_Complex
TC1700006627.hg.1	4,6	5,88	0,26	0,08	F	T	-2,44	2,14E-06	0,0001	F	NM_001124758; ENST00000329078; ENST00000570641; ENST00000570979; ENST00000571386; ENST00000571668; ENST00000573106; ENST00000573990; ENST00000576635; BC041772; OTTHUMT00000438802; OTTHUMT00000438803; OTTHUMT00000438804; OTTHUMT00000438805; OTTHUMT00000439105; OTTHUMT00000439106; OTTHUMT00000439107; OTTHUMT00000439108	SPNS2	spinster homolog 2 (Drosophila)	Multiple_Complex
TC1700011984.hg.1	9,29	7,88	0,16	0,12	T	T	2,66	2,26E-06	0,0001	T	NM_002522; ENST00000306773; ENST00000535681; ENST00000571100; ENST00000575212; BC089441; OTTHUMT00000438050; OTTHUMT00000438051; OTTHUMT00000438052; OTTHUMT00000438053	NPTX1	neuronal pentraxin I	Multiple_Complex
TC0300010632.hg.1	8,41	9,63	0,06	0,08	T	T	-2,32	2,27E-06	0,0001	T	NM_001174060; NM_017784; ENST00000396556; ENST00000428241; ENST00000429492; ENST00000438237; ENST00000452791; ENST00000463504; ENST00000465626; ENST00000466604; ENST00000467598; ENST00000467647; ENST00000467955; ENST00000469557; ENST00000472175; ENST00000479173; ENST00000479396; ENST00000480671; ENST00000485205; ENST00000490009; BC003168; OTTHUMT00000253165; OTTHUMT00000341886; OTTHUMT00000341887…	OSBPL10	oxysterol binding protein-like 10	Multiple_Complex
TC0600009327.hg.1	5,52	7,64	0,57	0,04	F	T	-4,34	2,28E-06	0,0001	F	NM_001270393; NM_001270394; NM_001270395; NM_032471; NM_181794; NM_181795; ENST00000258014; ENST00000354275; ENST00000368446; ENST00000368448; ENST00000368452; ENST00000392490; ENST00000392491; ENST00000583007; ENST00000607474; ENST00000608895; ENST00000615438; ENST00000618977; BC036011; BC093027	PKIB	protein kinase (cAMP-dependent, catalytic) inhibitor beta	Multiple_Complex
TC1200007626.hg.1	9,87	8,15	0,21	0,28	T	T	3,29	2,30E-06	0,0001	T	NM_014033; ENST00000332160; ENST00000547104; ENST00000548553; ENST00000550097; ENST00000550502; BC004492; BC008180; OTTHUMT00000404291; OTTHUMT00000404294; OTTHUMT00000404309; OTTHUMT00000404313; uc001rxb.3	METTL7A	methyltransferase like 7A	Coding
TC1700012460.hg.1	10,58	9,47	0,16	0,08	T	T	2,16	2,31E-06	0,0001	T	NM_018672; NM_172232; ENST00000392676; ENST00000586601; ENST00000586811; ENST00000586995; ENST00000587607; ENST00000588106; ENST00000588665; ENST00000588877; ENST00000589609; ENST00000589975; ENST00000591234; ENST00000592568; ENST00000593153; ENST00000593253; OTTHUMT00000450654; OTTHUMT00000450655; OTTHUMT00000450656; OTTHUMT00000450657; OTTHUMT00000450658; OTTHUMT00000450659; OTTHUMT00000450660;…	ABCA5	ATP binding cassette subfamily A member 5	Multiple_Complex
TC2200007027.hg.1	11,83	10,69	0,13	0,19	T	T	2,2	2,35E-06	0,0001	T	NM_000268; NM_016418; NM_181825; NM_181828; NM_181829; NM_181830; NM_181831; NM_181832; NM_181833; ENST00000334961; ENST00000338641; ENST00000353887; ENST00000361166; ENST00000361452; ENST00000361676; ENST00000397789; ENST00000403435; ENST00000403999; ENST00000413209; ENST00000432151; BC003112; BC020257; OTTHUMT00000075615; OTTHUMT00000277090; OTTHUMT00000322026; OTTHUMT00000322027; OTTHUMT000003…	NF2	neurofibromin 2 (merlin)	Multiple_Complex
TC2100008222.hg.1	9,21	7,76	0,17	0,27	T	T	2,73	2,38E-06	0,0001	T	NM_020639; ENST00000332512; ENST00000352483; BC110617; BC110618; OTTHUMT00000195204	RIPK4	receptor-interacting serine-threonine kinase 4	Coding
TC1200008466.hg.1	13,11	12,26	0,08	0,05	T	T	1,8	2,40E-06	0,0001	T	NM_001301022; NM_001301023; NM_001301024; NM_019094; NM_199040; ENST00000337179; ENST00000415493; ENST00000546925; ENST00000547014; ENST00000548662; ENST00000549992; ENST00000550056; OTTHUMT00000407701; OTTHUMT00000407702; OTTHUMT00000407703; OTTHUMT00000407704; OTTHUMT00000407705; OTTHUMT00000407706; OTTHUMT00000407707	NUDT4	nudix hydrolase 4	Multiple_Complex
TC0500008342.hg.1	9,1	10,28	0,13	0,19	T	T	-2,26	2,41E-06	0,0001	T	NM_001242377; NM_152624; NR_038352; ENST00000389063; ENST00000502635; ENST00000504961; ENST00000508359; ENST00000510046; ENST00000512751; ENST00000513585; ENST00000515408; BC064593; OTTHUMT00000370765; OTTHUMT00000370766; OTTHUMT00000370767; OTTHUMT00000370768; OTTHUMT00000370769; OTTHUMT00000370770; OTTHUMT00000371798; OTTHUMT00000371799	DCP2	decapping mRNA 2	Multiple_Complex
TC1200011327.hg.1	10,35	9,49	0,09	0,04	T	T	1,81	2,41E-06	0,0001	T	NM_001300965; NM_001321; ENST00000311083; ENST00000546966; ENST00000547435; ENST00000547557; ENST00000548783; ENST00000551725; ENST00000552330; BC000992; OTTHUMT00000406572; OTTHUMT00000406573; OTTHUMT00000406574; OTTHUMT00000406575; OTTHUMT00000406576; OTTHUMT00000406577; OTTHUMT00000406578	CSRP2	cysteine and glycine-rich protein 2	Multiple_Complex
TC1600008577.hg.1	9,21	10,47	0,2	0,14	T	T	-2,4	2,54E-06	0,0001	T	NM_017429; ENST00000258168; ENST00000563804; ENST00000564552; BC126210; BC126212; OTTHUMT00000269056; OTTHUMT00000432297; OTTHUMT00000432298	BCO1	beta-carotene oxygenase 1	Multiple_Complex
TC1400008058.hg.1	7,99	6,62	0,15	0,17	T	T	2,59	2,55E-06	0,0001	T	NM_020958; NM_058237; ENST00000304338; ENST00000328839; ENST00000553661; ENST00000555690; ENST00000556470; ENST00000556884; BC068491; OTTHUMT00000413054; OTTHUMT00000413055; OTTHUMT00000413056; OTTHUMT00000413057; OTTHUMT00000413058; OTTHUMT00000413059; uc001ycs.1	PPP4R4	protein phosphatase 4, regulatory subunit 4	Multiple_Complex
TC1100008881.hg.1	11,01	9,89	0,08	0,16	T	T	2,17	2,58E-06	0,0001	T	NM_152432; ENST00000298815; ENST00000524649; ENST00000524892; ENST00000525558; ENST00000529406; ENST00000529535; ENST00000531183; ENST00000534060; OTTHUMT00000394932; OTTHUMT00000395131; OTTHUMT00000395132; OTTHUMT00000395133; OTTHUMT00000395134; OTTHUMT00000395135; OTTHUMT00000395136; uc001pge.2	ARHGAP42	Rho GTPase activating protein 42	Multiple_Complex
TC1800008903.hg.1	9,36	10,32	0,18	0,13	T	T	-1,94	2,65E-06	0,0001	T	NM_002035; ENST00000326575; ENST00000406396; ENST00000585456; ENST00000585750; ENST00000586791; ENST00000587292; ENST00000588089; ENST00000589530; ENST00000589592; ENST00000590056; ENST00000591902; ENST00000592327; BC008797; OTTHUMT00000256200; OTTHUMT00000450706; OTTHUMT00000450707; OTTHUMT00000450708; OTTHUMT00000450709; OTTHUMT00000450813; OTTHUMT00000450814; OTTHUMT00000450815; OTTHUMT0000045…	KDSR	3-ketodihydrosphingosine reductase	Multiple_Complex
TC1900007115.hg.1	12,9	11,63	0,02	0,25	T	T	2,41	2,64E-06	0,0001	T	NM_001271043; NM_001271044; NM_002501; ENST00000358552; ENST00000360105; ENST00000397661; ENST00000585382; ENST00000585575; ENST00000586797; ENST00000586873; ENST00000587260; ENST00000587760; ENST00000588228; ENST00000588680; ENST00000590027; ENST00000591028; ENST00000592199; BC117113; BC117115; OTTHUMT00000452762; OTTHUMT00000452763; OTTHUMT00000452764; OTTHUMT00000452765; OTTHUMT00000452766; OT…	NFIX	nuclear factor I/X (CCAAT-binding transcription factor)	Multiple_Complex
TC0600008539.hg.1	12,18	11,23	0,13	0,11	T	T	1,94	2,68E-06	0,0002	T	NM_001159587; NM_001159588; NM_133493; ENST00000287097; ENST00000422508; ENST00000437994; ENST00000474094; OTTHUMT00000041230; OTTHUMT00000041231	CD109	CD109 molecule	Multiple_Complex
TC0700010965.hg.1	14,06	13,18	0,03	0,04	T	T	1,84	2,69E-06	0,0002	T	NM_000598; NM_001013398; ENST00000275521; ENST00000381083; ENST00000381086; ENST00000417621; ENST00000428530; ENST00000448817; ENST00000460209; ENST00000460477; ENST00000465642; ENST00000613132; ENST00000615754; BC000013; BC018962; BC064987; OTTHUMT00000251356; OTTHUMT00000340042; OTTHUMT00000340048; OTTHUMT00000340049; OTTHUMT00000340050; OTTHUMT00000340051; OTTHUMT00000340052; OTTHUMT0000034005…	IGFBP3	insulin like growth factor binding protein 3	Multiple_Complex
TC1200007615.hg.1	14,04	13,07	0,13	0,02	T	T	1,95	2,71E-06	0,0002	T	NM_173602; ENST00000301180; ENST00000546719; ENST00000546732; ENST00000549620; ENST00000552328; OTTHUMT00000404243; OTTHUMT00000404244; OTTHUMT00000404295; OTTHUMT00000404296; OTTHUMT00000404297	DIP2B	disco-interacting protein 2 homolog B	Multiple_Complex
TC1900009198.hg.1	11,26	10,11	0,2	0,11	T	T	2,22	2,79E-06	0,0002	T	NM_017797; ENST00000255608; ENST00000587225; ENST00000587742; ENST00000587825; ENST00000588395; ENST00000589200; ENST00000589685; ENST00000590646; ENST00000592082; ENST00000592895; ENST00000611545; OTTHUMT00000449298; OTTHUMT00000449299; OTTHUMT00000449300; OTTHUMT00000449301; OTTHUMT00000449302; OTTHUMT00000449303; OTTHUMT00000449305; OTTHUMT00000449306; OTTHUMT00000449307; OTTHUMT00000473299; O…	BTBD2	BTB (POZ) domain containing 2	Multiple_Complex
TC0100013076.hg.1	8,53	9,73	0,21	0,22	T	T	-2,3	2,79E-06	0,0002	T	NM_007365; ENST00000375481; ENST00000375486; ENST00000466151; ENST00000479534; BC009701; OTTHUMT00000006624; OTTHUMT00000006625; OTTHUMT00000006626; OTTHUMT00000006627	PADI2	peptidyl arginine deiminase, type II	Multiple_Complex
TC1000012491.hg.1	10,75	11,69	0,08	0,08	T	T	-1,92	2,83E-06	0,0002	T	NM_020354; ENST00000370489; ENST00000472998; BC119008; BC122857; OTTHUMT00000049809; OTTHUMT00000049810	ENTPD7	ectonucleoside triphosphate diphosphohydrolase 7	Multiple_Complex
TSUnmapped00000374.hg.1	9,19	7,5	0,21	0,33	T	T	3,21	2,84E-06	0,0002	T	ENST00000628303	DUSP16	dual specificity phosphatase 16	Coding
TC1100010008.hg.1	8,94	7	0,22	0,48	T	T	3,85	2,94E-06	0,0002	T	NM_153444; ENST00000329434; BC101710; BC113557; OTTHUMT00000385696	OR5P2	olfactory receptor, family 5, subfamily P, member 2	Coding
TC0900011379.hg.1	9,7	8,54	0,22	0,18	T	T	2,24	2,97E-06	0,0002	T	NM_001080497; ENST00000373930; OTTHUMT00000055513	MEGF9	multiple EGF-like-domains 9	Multiple_Complex
TC2200006935.hg.1	7,37	8,35	0,14	0,03	T	T	-1,97	2,99E-06	0,0002	T	NM_005160; ENST00000324198; ENST00000455558; ENST00000619906; BC036797; OTTHUMT00000317296; OTTHUMT00000320369	ADRBK2	adrenergic, beta, receptor kinase 2	Multiple_Complex
TC0100010755.hg.1	10,65	11,77	0,26	0,14	T	T	-2,17	3,06E-06	0,0002	T	NM_001286247; NM_152663; ENST00000324778; ENST00000367632; ENST00000367634; ENST00000367635; ENST00000415888; ENST00000477383; ENST00000478871; ENST00000480743; ENST00000495034; BC047391; OTTHUMT00000084925; OTTHUMT00000084926; OTTHUMT00000098160; OTTHUMT00000098161; OTTHUMT00000098162; OTTHUMT00000098163; OTTHUMT00000098164; OTTHUMT00000098165	RALGPS2	Ral GEF with PH domain and SH3 binding motif 2	Multiple_Complex
TC0600014106.hg.1	6,52	4,92	0,29	0,25	T	T	3,03	3,06E-06	0,0002	T	NM_001710; ENST00000425368; ENST00000452035; ENST00000460718; ENST00000461483; ENST00000465750; ENST00000467150; ENST00000467360; ENST00000472581; ENST00000482312; ENST00000482886; ENST00000483004; ENST00000497841; ENST00000498317; BC004143; BC007990; OTTHUMT00000076395; OTTHUMT00000076396; OTTHUMT00000268593; OTTHUMT00000268594; OTTHUMT00000268595; OTTHUMT00000268596; OTTHUMT00000268597; OTTHUMT…	CFB	complement factor B	Multiple_Complex
TC1000008354.hg.1	9,25	10,32	0,27	0,13	T	T	-2,1	3,11E-06	0,0002	T	NM_001015880; NM_004670; ENST00000361175; ENST00000456849; ENST00000465996; ENST00000482258; BC009894; OTTHUMT00000049229; OTTHUMT00000049230; OTTHUMT00000049231	PAPSS2	3-phosphoadenosine 5-phosphosulfate synthase 2	Multiple_Complex
TC0400012780.hg.1	9,61	10,84	0,18	0,09	T	T	-2,34	3,12E-06	0,0002	T	NM_018323; ENST00000264864; BC051749; OTTHUMT00000250415	PI4K2B	phosphatidylinositol 4-kinase type 2 beta	Multiple_Complex
TC0100011245.hg.1	8,95	6,25	0,2	0,56	T	T	6,5	3,15E-06	0,0002	T	NM_000674; NM_001048230; ENST00000309502; ENST00000337894; ENST00000367235; ENST00000367236; ENST00000464019; ENST00000467253; ENST00000472535; ENST00000618295; BC026340; OTTHUMT00000100273; OTTHUMT00000100274; OTTHUMT00000101318; OTTHUMT00000101319; OTTHUMT00000101320; OTTHUMT00000101321; uc001gze.1	ADORA1	adenosine A1 receptor	Multiple_Complex
TC2200008364.hg.1	7,56	8,79	0,13	0,19	T	T	-2,35	3,16E-06	0,0002	T	hsa_circ_0006776	TTC28	Jeck2013 ALT_ACCEPTOR, ALT_DONOR, coding, INTERNAL, intronic best transcript NM_001145418	NonCoding
TC0500013245.hg.1	10,54	9,52	0,07	0,19	T	T	2,03	3,17E-06	0,0002	T	NM_019119; ENST00000316105; ENST00000623266; ENST00000624909; BC100672; BC105636; BC105640; OTTHUMT00000476908; OTTHUMT00000478886; OTTHUMT00000478887	PCDHB9	protocadherin beta 9	Multiple_Complex
TC0400009221.hg.1	15,25	14,24	0,1	0,05	T	T	2,01	3,21E-06	0,0002	T	NM_001017369; NM_006745; ENST00000261507; ENST00000393766; ENST00000504317; ENST00000505270; ENST00000507013; BC010653; BC107879; OTTHUMT00000363880; OTTHUMT00000363881; OTTHUMT00000363882; OTTHUMT00000363883; OTTHUMT00000363884	MSMO1	methylsterol monooxygenase 1	Multiple_Complex
TC1200010185.hg.1	11,73	10,7	0,14	0,03	T	T	2,04	3,28E-06	0,0002	T	NM_002223; ENST00000242737; ENST00000381340; ENST00000451599; ENST00000536627; ENST00000538984; ENST00000540429; ENST00000540791; ENST00000543958; ENST00000545235; ENST00000545902; OTTHUMT00000402732; OTTHUMT00000402733; OTTHUMT00000402734; OTTHUMT00000402735; OTTHUMT00000402814; OTTHUMT00000402816; OTTHUMT00000402817; OTTHUMT00000403292; OTTHUMT00000403293; OTTHUMT00000403294	ITPR2	inositol 1,4,5-trisphosphate receptor, type 2	Multiple_Complex
TC0600008066.hg.1	10,22	9	0,09	0,22	T	T	2,34	3,31E-06	0,0002	T	NM_057161; NR_040101; ENST00000244670; ENST00000326974; ENST00000332245; BC000295; BC001789; BC001793; BC007296; BC009460; BC021546; BC041793; BC045612; OTTHUMT00000040570	KLHDC3	kelch domain containing 3	Multiple_Complex
TC1400009481.hg.1	6,18	7,52	0,18	0,12	T	T	-2,53	3,33E-06	0,0002	T	NM_016445; ENST00000216446; ENST00000553387; ENST00000554395; ENST00000555803; ENST00000556532; ENST00000557388; BC001226; OTTHUMT00000412547; OTTHUMT00000412711; OTTHUMT00000412712; OTTHUMT00000412713; OTTHUMT00000412714; OTTHUMT00000412715	PLEK2	pleckstrin 2	Multiple_Complex
TC0800007416.hg.1	12,25	11,04	0,19	0,08	T	T	2,31	3,38E-06	0,0002	T	NM_032336; ENST00000276533; ENST00000518430; ENST00000518671; ENST00000520354; ENST00000520631; ENST00000520710; ENST00000520736; ENST00000522642; ENST00000523277; BC005995; OTTHUMT00000377146; OTTHUMT00000377147; OTTHUMT00000377148; OTTHUMT00000377149; OTTHUMT00000377150; OTTHUMT00000377151; OTTHUMT00000377152; OTTHUMT00000377153; uc003xnx.3	GINS4	GINS complex subunit 4 (Sld5 homolog)	Multiple_Complex
TC0X00008235.hg.1	7,87	9,05	0,06	0,23	T	T	-2,27	3,42E-06	0,0002	T	NM_001031855; NM_001289109; NM_024778; NR_110311; ENST00000304778; ENST00000371628; ENST00000422289; ENST00000439603; ENST00000472173; ENST00000481285; BC099847; BC100671; BC103491; OTTHUMT00000058016; OTTHUMT00000058017; OTTHUMT00000058018; OTTHUMT00000355124	LONRF3	LON peptidase N-terminal domain and ring finger 3	Multiple_Complex
TC0300011455.hg.1	8,68	10,77	0,43	0,11	T	T	-4,26	3,48E-06	0,0002	T	NM_015123; ENST00000398540; ENST00000459638; ENST00000460709; ENST00000462308; ENST00000462512; ENST00000462888; ENST00000470070; ENST00000473029; ENST00000473188; ENST00000478263; ENST00000483668; ENST00000487751; ENST00000489817; ENST00000493127; ENST00000493880; ENST00000497475; ENST00000497757; ENST00000497880; OTTHUMT00000352111; OTTHUMT00000352112; OTTHUMT00000352113; OTTHUMT00000352115; OT…	FRMD4B	FERM domain containing 4B	Multiple_Complex
TC2000007670.hg.1	8,17	6,62	0,1	0,11	T	T	2,94	3,48E-06	0,0002	T	NM_005985; ENST00000244050; BC012910; OTTHUMT00000080350	SNAI1	snail family zinc finger 1	Coding
TC0X00010982.hg.1	11,7	9,39	0,37	0,42	T	T	4,95	3,50E-06	0,0002	T	NM_004065; ENST00000370532; BC113472; BC113474; OTTHUMT00000058583	CDR1	cerebellar degeneration related protein 1	Coding
TC0400011203.hg.1	6,54	7,49	0,09	0,08	T	T	-1,94	3,53E-06	0,0002	T	NM_001098540; NM_001166498; NM_001199830; NM_006665; ENST00000311412; ENST00000405413; ENST00000507150; ENST00000508891; ENST00000509906; ENST00000512196; ENST00000513463; BC051321; OTTHUMT00000252812; OTTHUMT00000252813; OTTHUMT00000363967; OTTHUMT00000363968; OTTHUMT00000363969; OTTHUMT00000363970; OTTHUMT00000363971; uc003hok.4	HPSE	heparanase	Multiple_Complex
TC1900007465.hg.1	12,78	11,71	0,06	0,09	T	T	2,11	3,52E-06	0,0002	T	NM_052852; ENST00000335117; ENST00000597083; BC117268; OTTHUMT00000447843; OTTHUMT00000462902	ZNF486	zinc finger protein 486	Multiple_Complex
TC0800006760.hg.1	14,37	13,56	0,06	0,07	T	T	1,76	3,59E-06	0,0002	T	NM_001287742; NM_001287743; NM_001287744; NM_001287745; NM_001287747; NM_001287748; NM_001287749; NM_001287750; NM_001287751; NM_001287756; NM_004462; ENST00000220584; ENST00000443614; ENST00000446331; ENST00000525283; ENST00000525551; ENST00000525571; ENST00000525607; ENST00000525777; ENST00000525900; ENST00000525954; ENST00000527045; ENST00000528643; ENST00000528729; ENST00000528812; ENST000005…	FDFT1	farnesyl-diphosphate farnesyltransferase 1	Multiple_Complex
TC1900008562.hg.1	8,88	7,44	0,31	0,2	T	T	2,71	3,59E-06	0,0002	T	NM_001168222; NM_024682; NR_039905; ENST00000221543; ENST00000535102; ENST00000584564; ENST00000594984; ENST00000594996; ENST00000596243; ENST00000598789; ENST00000599049; ENST00000600354; ENST00000622860; BC003516; OTTHUMT00000466404; OTTHUMT00000466405; OTTHUMT00000466406; OTTHUMT00000466408; OTTHUMT00000466409; OTTHUMT00000466410; OTTHUMT00000466411; OTTHUMT00000466412	TBC1D17; MIR4750	TBC1 domain family, member 17; microRNA 4750	Multiple_Complex
TC1700008769.hg.1	7,86	5,29	0,39	0,43	T	T	5,94	3,70E-06	0,0002	T	NM_000891; ENST00000243457; ENST00000535240; OTTHUMT00000450888; OTTHUMT00000450889	KCNJ2	potassium channel, inwardly rectifying subfamily J, member 2	Coding
TC1600008656.hg.1	6,95	8,34	0,26	0,14	T	T	-2,62	3,74E-06	0,0002	T	NM_001303451; NM_024731; ENST00000258157; ENST00000325279; ENST00000564159; ENST00000564996; ENST00000565743; ENST00000567410; ENST00000569472; BC032400; BC033821; OTTHUMT00000269084; OTTHUMT00000433654; OTTHUMT00000433655; OTTHUMT00000433656; OTTHUMT00000433657; OTTHUMT00000433658; OTTHUMT00000433659	KLHL36	kelch-like family member 36	Multiple_Complex
TC0700008292.hg.1	10,27	8,86	0,2	0,05	T	T	2,65	3,76E-06	0,0002	T	NM_012449; ENST00000297205; ENST00000412573; ENST00000475789; BC011802; OTTHUMT00000059327; OTTHUMT00000313656; OTTHUMT00000350760; uc003ujx.3	STEAP1	six transmembrane epithelial antigen of the prostate 1	Multiple_Complex
TC0800009891.hg.1	13,21	14,03	0,12	0,03	T	T	-1,77	3,83E-06	0,0002	T	NM_003155; ENST00000290271; ENST00000524323; BC029044; OTTHUMT00000215143; OTTHUMT00000376073	STC1	stanniocalcin 1	Multiple_Complex
TC0900008587.hg.1	8,96	9,85	0,18	0,02	T	T	-1,85	3,86E-06	0,0002	T	NM_003266; NM_138554; NM_138557; ENST00000355622; ENST00000394487; ENST00000472304; ENST00000490685; BC117422; OTTHUMT00000055549; OTTHUMT00000055550; OTTHUMT00000055551; OTTHUMT00000055552	TLR4	toll-like receptor 4	Multiple_Complex
TC0500007831.hg.1	10,26	9,36	0,1	0,04	T	T	1,87	3,92E-06	0,0002	T	NM_001311313; NM_001992; ENST00000319211; ENST00000505600; BC002464; BC051909; OTTHUMT00000254068; OTTHUMT00000368896	F2R	coagulation factor II (thrombin) receptor	Multiple_Complex
TC0500011260.hg.1	9,82	8,57	0,14	0,16	T	T	2,39	3,99E-06	0,0002	T	NM_001174071; NM_001174072; NM_178276; NR_126060; NR_126061; ENST00000502747; ENST00000507668; ENST00000509193; ENST00000512721; ENST00000512972; ENST00000513907; ENST00000632581; BC101280; BC101281; BC101283; OTTHUMT00000369572; OTTHUMT00000369573; OTTHUMT00000369915; OTTHUMT00000369916; OTTHUMT00000369917; OTTHUMT00000485117; uc011ctj.2	SERINC5	serine incorporator 5	Multiple_Complex
TC1000008749.hg.1	9,83	8,73	0,13	0,19	T	T	2,14	3,99E-06	0,0002	T	NM_178858; ENST00000369893; ENST00000459894; ENST00000480358; ENST00000602287; ENST00000602439; ENST00000602544; ENST00000602647; ENST00000602660; ENST00000602670; ENST00000602764; ENST00000602785; ENST00000602831; ENST00000602868; BC022091; OTTHUMT00000050096; OTTHUMT00000050097; OTTHUMT00000467455; OTTHUMT00000467456; OTTHUMT00000467457; OTTHUMT00000467458; OTTHUMT00000467459; OTTHUMT0000046746…	SFXN2	sideroflexin 2	Multiple_Complex
TC0800010382.hg.1	12,3	10,98	0,08	0,11	T	T	2,5	4,01E-06	0,0002	T	NM_003068; ENST00000020945; ENST00000396822; BC014890; BC015895; OTTHUMT00000313873	SNAI2	snail family zinc finger 2	Coding
TSUnmapped00000353.hg.1	9,21	8,12	0,11	0,19	T	T	2,14	4,02E-06	0,0002	T	ENST00000629698	DUSP16	dual specificity phosphatase 16	Coding
TC0300011029.hg.1	11,55	10,6	0,01	0,09	T	T	1,94	4,04E-06	0,0002	T	NM_003365; ENST00000203407; ENST00000412343; ENST00000415995; ENST00000460105; ENST00000463708; ENST00000467690; ENST00000471189; ENST00000472438; ENST00000480561; ENST00000493806; BC009586; OTTHUMT00000257517; OTTHUMT00000344979; OTTHUMT00000344981; OTTHUMT00000344982; OTTHUMT00000344983; OTTHUMT00000345032; OTTHUMT00000345033; OTTHUMT00000345034; OTTHUMT00000345035; OTTHUMT00000345036	UQCRC1	ubiquinol-cytochrome c reductase core protein I	Multiple_Complex
TC0800011855.hg.1	8,06	6,71	0,31	0,19	T	T	2,55	4,17E-06	0,0002	T	NM_001204824; NM_004519; ENST00000388996; ENST00000519445; ENST00000519589; ENST00000521134; ENST00000621976; OTTHUMT00000268621; OTTHUMT00000379574; OTTHUMT00000379575; OTTHUMT00000379576	KCNQ3	potassium channel, voltage gated KQT-like subfamily Q, member 3	Multiple_Complex
TC0500011194.hg.1	10,36	9,14	0,12	0,05	T	T	2,33	4,21E-06	0,0002	T	NM_001256566; NM_004101; ENST00000296641; ENST00000504899; BC093648; BC093650; OTTHUMT00000219958; OTTHUMT00000368874	F2RL2	coagulation factor II (thrombin) receptor-like 2	Coding
TC0700009834.hg.1	4,55	6,42	0,18	0,52	F	T	-3,67	4,49E-06	0,0002	F	NM_001291913; OTTHUMT00000322334; uc064jpo.1	LOC389602; AC021218.2	uncharacterized LOC389602; novel transcript	Multiple_Complex
TC0700011318.hg.1	10,1	8,96	0,18	0,17	T	T	2,21	4,49E-06	0,0002	T	NM_001007253; NM_015852; ENST00000282869; ENST00000394323; ENST00000487644; ENST00000528878; ENST00000535538; ENST00000610793; ENST00000620222; OTTHUMT00000344863; OTTHUMT00000344864; OTTHUMT00000381468; OTTHUMT00000383882; OTTHUMT00000399083	ERV3-1; ZNF117	endogenous retrovirus group 3, member 1; zinc finger protein 117	Multiple_Complex
TC1900008826.hg.1	5,83	7,2	0,24	0,11	T	T	-2,59	4,49E-06	0,0002	T	NM_031896; ENST00000222212; ENST00000391766; ENST00000391767; ENST00000468076; BC069332; BC093869; BC113503; OTTHUMT00000139240; OTTHUMT00000139241; OTTHUMT00000139248; OTTHUMT00000318714	CACNG7	calcium channel, voltage-dependent, gamma subunit 7	Multiple_Complex
TC0100009944.hg.1	13,91	14,78	0,09	0,12	T	T	-1,83	4,51E-06	0,0002	T	NM_001135636; NM_001135637; NM_001135638; NM_003557; ENST00000349792; ENST00000368888; ENST00000368890; ENST00000409426; ENST00000418435; ENST00000424999; ENST00000441902; ENST00000447555; ENST00000454769; ENST00000460157; ENST00000461816; ENST00000464105; ENST00000468772; ENST00000481713; ENST00000486048; ENST00000486866; ENST00000489625; BC007833; OTTHUMT00000034423; OTTHUMT00000034424; OTTHUMT…	PIP5K1A	phosphatidylinositol-4-phosphate 5-kinase, type I, alpha	Multiple_Complex
TC0400012222.hg.1	8,82	7,56	0,06	0,24	T	T	2,4	4,52E-06	0,0002	T	NM_016205; NR_036641; ENST00000274071; ENST00000422544; ENST00000502773; ENST00000504672; ENST00000506880; ENST00000510982; ENST00000511985; ENST00000512711; ENST00000513664; BC136662; OTTHUMT00000366123; OTTHUMT00000366124; OTTHUMT00000366125; OTTHUMT00000366126; OTTHUMT00000366127; OTTHUMT00000366128; OTTHUMT00000366129; OTTHUMT00000366130; OTTHUMT00000381517	PDGFC	platelet derived growth factor C	Multiple_Complex
TC2000009925.hg.1	8,62	9,63	0,12	0,15	T	T	-2,02	4,53E-06	0,0002	T	NR_003189; OTTHUMT00000079444; OTTHUMT00000079448; OTTHUMT00000079450; OTTHUMT00000388405	SYS1-DBNDD2	SYS1-DBNDD2 readthrough (NMD candidate)	Multiple_Complex
TC0900011613.hg.1	10,3	8,79	0,25	0,08	T	T	2,83	4,58E-06	0,0002	T	NM_001035254; NM_203305; ENST00000300434; ENST00000373084; ENST00000373095; ENST00000465821; ENST00000479828; ENST00000493175; ENST00000494606; BC137087; BC137088; OTTHUMT00000054298; OTTHUMT00000054300; OTTHUMT00000054301; OTTHUMT00000054302; OTTHUMT00000054303; OTTHUMT00000054304; OTTHUMT00000054305	FAM102A	family with sequence similarity 102, member A	Multiple_Complex
TC1100007394.hg.1	8,91	7,84	0,12	0,06	T	T	2,09	4,65E-06	0,0002	T	NM_001024844; NM_002231; ENST00000227155; ENST00000342935; ENST00000524704; ENST00000524750; ENST00000525210; ENST00000525813; ENST00000525898; ENST00000526958; ENST00000527737; ENST00000529277; ENST00000529853; ENST00000530601; ENST00000530931; ENST00000532544; BC000726; BC001821; OTTHUMT00000389885; OTTHUMT00000389886; OTTHUMT00000389887; OTTHUMT00000389888; OTTHUMT00000389889; OTTHUMT000003898…	CD82	CD82 molecule	Multiple_Complex
TC1200010459.hg.1	10,81	9,54	0,2	0,16	T	T	2,42	4,67E-06	0,0002	T	NM_001144881; NM_001144882; NM_001144883; NM_153026; ENST00000345127; ENST00000445766; ENST00000455697; ENST00000547113; ENST00000548696; ENST00000551050; ENST00000552108; ENST00000552200; ENST00000552240; BC114939; BC114940; uc010skw.2	PRICKLE1	prickle homolog 1	Multiple_Complex
TC0200009986.hg.1	14,12	15,24	0,09	0,02	T	T	-2,17	4,74E-06	0,0002	T	NM_016653; NM_133646; ENST00000338983; ENST00000375213; ENST00000409176; ENST00000422149; ENST00000468408; ENST00000476618; ENST00000480606; ENST00000539448; BC001401; CCDS2251.1; CCDS42777.1; hsa_circ_0057117; hsa_circ_0057118; hsa_circ_0057119; hsa_circ_0057120; hsa_circ_0057121; hsa_circ_0057122; uc002uhy.4; uc002uhz.4; uc061ptb.1; uc061ptc.1; uc061ptd.1; uc061pte.1; uc061ptf.1; uc061ptg.1; ZA…	ZAK; pk	sterile alpha motif and leucine zipper containing kinase AZK; Mitogen-activated protein kinase kinase kinase MLT [Source:UniProtKB/Swiss-Prot;Acc:Q9NYL2]; Salzman2013 ANNOTATED, CDS, coding, INTERNAL, OVCODE, OVERLAPTX, OVEXON best transcript NM_133646; Salzman2013 ANNOTATED, CDS, coding, OVCODE, OVERLAPTX, OVEXON, UTR3 best transcript NM_016653; Salzman2013 ANNOTATED, CDS, coding, OVCODE, OVERLA…	Multiple_Complex
TC0500012775.hg.1	7,63	8,81	0,19	0,21	T	T	-2,28	4,75E-06	0,0002	T	NM_001129891; ENST00000377365; ENST00000523970; OTTHUMT00000371629; OTTHUMT00000371630	FAM196B	family with sequence similarity 196, member B	Multiple_Complex
TC0300011502.hg.1	7,29	5,89	0,12	0,27	T	T	2,63	4,86E-06	0,0002	T	FOXP1.vpAug10; OTTHUMT00000476288; uc062llx.1	FOXP1; RP11-298C2.1	Transcript Identified by AceView, Entrez Gene ID(s) 27086; novel transcript, sense intronic to FOXP1	NonCoding
TC2000008815.hg.1	11,3	12,37	0,14	0,13	T	T	-2,11	4,97E-06	0,0002	T	NM_001191; NM_138578; ENST00000307677; ENST00000376055; ENST00000376062; ENST00000420488; ENST00000422920; ENST00000434194; ENST00000439267; ENST00000450273; ENST00000456404; BC019307; OTTHUMT00000078572; OTTHUMT00000078573; OTTHUMT00000078574; OTTHUMT00000078575; OTTHUMT00000078576; OTTHUMT00000078577; OTTHUMT00000078578; OTTHUMT00000078579; OTTHUMT00000078580	BCL2L1	BCL2-like 1	Multiple_Complex
TC0200007805.hg.1	12,36	13,13	0,05	0,03	T	T	-1,71	4,98E-06	0,0002	T	NM_001002243; NM_017657; NM_203437; ENST00000238855; ENST00000238856; ENST00000409183; ENST00000409933; ENST00000422803; ENST00000487769; ENST00000498706; BC047529; OTTHUMT00000251729; OTTHUMT00000327301; OTTHUMT00000327302; OTTHUMT00000327303; OTTHUMT00000327304	AFTPH	aftiphilin	Multiple_Complex
TC1200012666.hg.1	11,61	10,6	0,02	0,07	T	T	2,03	5,01E-06	0,0002	T	NM_018279; ENST00000266673; ENST00000546677; ENST00000546795; ENST00000549735; ENST00000550524; ENST00000550787; BC008596; OTTHUMT00000404801; OTTHUMT00000404803; OTTHUMT00000404804; OTTHUMT00000404805; OTTHUMT00000404806; OTTHUMT00000404807	TMEM19	transmembrane protein 19	Multiple_Complex
TC0500009175.hg.1	13,74	12,64	0,12	0,15	T	T	2,14	5,05E-06	0,0002	T	NM_015315; ENST00000336314; ENST00000517616; ENST00000518194; ENST00000518297; ENST00000518595; ENST00000518677; ENST00000518742; ENST00000518892; ENST00000519194; ENST00000519931; ENST00000521577; ENST00000522272; ENST00000523163; ENST00000524187; ENST00000524248; BC001460; OTTHUMT00000252509; OTTHUMT00000377415; OTTHUMT00000377416; OTTHUMT00000377417; OTTHUMT00000377418; OTTHUMT00000377419; OTT…	LARP1	La ribonucleoprotein domain family, member 1	Multiple_Complex
TC0600009669.hg.1	12,09	13,07	0,08	0,09	T	T	-1,97	5,09E-06	0,0002	T	NM_001032394; NM_001032395; NM_020455; NM_198569; ENST00000230173; ENST00000296932; ENST00000367608; ENST00000367609; ENST00000415128; ENST00000435011; ENST00000463637; ENST00000472054; ENST00000497898; ENST00000508295; ENST00000538281; ENST00000540208; ENST00000541199; ENST00000545477; BC075798	ADGRG6	adhesion G protein-coupled receptor G6	Multiple_Complex
TC0500013354.hg.1	11,33	10,2	0,08	0,1	T	T	2,19	5,14E-06	0,0003	T	NM_001017973; NM_001017974; NM_001142598; NM_001142599; NM_004199; ENST00000166534; ENST00000360568; ENST00000379086; ENST00000379100; ENST00000379104; ENST00000395164; ENST00000401867; ENST00000417528; ENST00000418055; ENST00000428369; ENST00000428841; ENST00000453286; ENST00000467587; ENST00000474628; ENST00000478055; ENST00000506807; BC017062; BC035813; OTTHUMT00000132653; OTTHUMT00000132654; …	P4HA2	prolyl 4-hydroxylase, alpha polypeptide II	Multiple_Complex
TC2000009218.hg.1	12,71	13,65	0,11	0,05	T	T	-1,91	5,21E-06	0,0003	T	NM_002999; ENST00000372733; BC030805; OTTHUMT00000080515	SDC4	syndecan 4	Multiple_Complex
TC0700008265.hg.1	5,1	6,51	0,18	0,08	F	T	-2,66	5,34E-06	0,0003	F	NM_004194; NM_016351; NM_021721; NM_021722; NM_021723; ENST00000265727; ENST00000398201; ENST00000398203; ENST00000398204; ENST00000398209; ENST00000412441; ENST00000413139; ENST00000426930; ENST00000439864; ENST00000476330; ENST00000478920; BC125118; OTTHUMT00000268368; OTTHUMT00000268369; OTTHUMT00000268370; OTTHUMT00000268371; OTTHUMT00000268372; OTTHUMT00000268373; OTTHUMT00000268377; OTTHUMT…	ADAM22	ADAM metallopeptidase domain 22	Multiple_Complex
TC0100015725.hg.1	13,46	14,25	0,05	0,02	T	T	-1,73	5,38E-06	0,0003	T	NM_001136478; NM_001136479; NM_001280559; NM_001280560; NM_030920; ENST00000369114; ENST00000369115; ENST00000436748; ENST00000532744; ENST00000533654; ENST00000534220; ENST00000534437; ENST00000583931; ENST00000616917; ENST00000629042; BC003380; OTTHUMT00000035056; OTTHUMT00000035057; OTTHUMT00000095850; OTTHUMT00000095851; OTTHUMT00000387925; OTTHUMT00000387926; OTTHUMT00000387927; OTTHUMT00000…	ANP32E	acidic nuclear phosphoprotein 32 family member E	Multiple_Complex
TC0X00011221.hg.1	5,11	6,32	0,23	0,07	F	T	-2,31	5,40E-06	0,0003	F	NM_001081573; NM_001282283; NM_080612; NR_104114; ENST00000369568; ENST00000369575; ENST00000424127; ENST00000454973; ENST00000475685; ENST00000496390; OTTHUMT00000061192; OTTHUMT00000061193; OTTHUMT00000061194; OTTHUMT00000061195; OTTHUMT00000316586; OTTHUMT00000377380	GAB3	GRB2-associated binding protein 3	Multiple_Complex
TC0X00009762.hg.1	9,05	7,7	0,11	0,36	T	T	2,55	5,45E-06	0,0003	T	NM_001037811; NM_004493; ENST00000168216; ENST00000375298; ENST00000375304; ENST00000477706; ENST00000495986; BC000372; BC008708; OTTHUMT00000056750; OTTHUMT00000056751; OTTHUMT00000056752; OTTHUMT00000056753; OTTHUMT00000056754	HSD17B10	hydroxysteroid (17-beta) dehydrogenase 10	Multiple_Complex
TC1200012637.hg.1	8,08	6,31	0,28	0,16	T	T	3,42	5,46E-06	0,0003	T	NM_017409; ENST00000303460; ENST00000511575; ENST00000513413; ENST00000514415; ENST00000515593; BC001293; OTTHUMT00000358952; OTTHUMT00000358953; OTTHUMT00000358954; OTTHUMT00000358955; OTTHUMT00000358956	HOXC10	homeobox C10	Multiple_Complex
TC0100015234.hg.1	10,76	9,45	0,09	0,28	T	T	2,49	5,54E-06	0,0003	T	NM_001201546; NM_001201547; NM_001201548; NM_001201549; NM_004696; ENST00000369779; ENST00000369781; ENST00000437429; ENST00000461647; ENST00000467986; ENST00000472422; ENST00000492412; ENST00000497687; ENST00000528649; ENST00000541986; BC021664; OTTHUMT00000031115; OTTHUMT00000031955; OTTHUMT00000031956; OTTHUMT00000031957; OTTHUMT00000031958; OTTHUMT00000031959; OTTHUMT00000031960; OTTHUMT00000…	SLC16A4	solute carrier family 16, member 4	Multiple_Complex
TC2200009277.hg.1	7,74	9,74	0,27	0,42	T	T	-3,99	5,54E-06	0,0003	T	NM_001204827; NM_022098; ENST00000357137; ENST00000417688; ENST00000428799; ENST00000465258; ENST00000482652; ENST00000614001; BC001208; BC001681; BC004989; OTTHUMT00000322201; OTTHUMT00000322202; OTTHUMT00000322204; OTTHUMT00000322205; OTTHUMT00000322206	XPNPEP3	X-prolyl aminopeptidase 3, mitochondrial	Multiple_Complex
TC0X00006603.hg.1	12,89	13,7	0,1	0,1	T	T	-1,76	5,61E-06	0,0003	T	NM_001122608; NM_001171991; NM_005333; ENST00000321143; ENST00000380762; ENST00000380763; BC001691; BC095455; OTTHUMT00000055742; OTTHUMT00000055743; OTTHUMT00000055744	HCCS	holocytochrome c synthase	Multiple_Complex
TC0700012684.hg.1	13	13,89	0,11	0,06	T	T	-1,85	5,66E-06	0,0003	T	NM_001628; ENST00000285930; ENST00000426422; ENST00000434222; ENST00000462784; ENST00000465351; ENST00000467251; ENST00000467829; ENST00000484592; ENST00000487438; ENST00000489022; ENST00000491741; ENST00000497983; ENST00000498373; ENST00000498771; BC000260; BC005387; BC010391; OTTHUMT00000339448; OTTHUMT00000339449; OTTHUMT00000339450; OTTHUMT00000339451; OTTHUMT00000339452; OTTHUMT00000339453; …	AKR1B1	aldo-keto reductase family 1, member B1 (aldose reductase)	Multiple_Complex
TC1700007204.hg.1	11,51	10,44	0,1	0,26	T	T	2,1	5,86E-06	0,0003	T	NM_001033553; NM_001033554; NM_001033555; NM_001243438; NM_001243439; NM_152904; ENST00000261503; ENST00000395522; ENST00000395525; ENST00000395527; ENST00000395529; ENST00000395530; ENST00000413167; ENST00000467722; ENST00000472876; ENST00000492188; ENST00000578153; ENST00000578321; ENST00000579688; ENST00000580934; ENST00000581399; ENST00000581973; ENST00000582063; ENST00000582226; ENST00000582…	SPECC1	sperm antigen with calponin homology and coiled-coil domains 1	Multiple_Complex
TC1600011428.hg.1	10,92	11,8	0,07	0,07	T	T	-1,85	5,87E-06	0,0003	T	NM_018975; ENST00000300086; ENST00000569234; BC004465; BC005841; BC022428; BC078171; OTTHUMT00000435519; OTTHUMT00000435520	TERF2IP	telomeric repeat binding factor 2, interacting protein	Coding
TC0600009545.hg.1	10,8	9,71	0,1	0,18	T	T	2,13	5,91E-06	0,0003	T	NM_018945; ENST00000308191; ENST00000446774; ENST00000615259; BC075082; BC075083; OTTHUMT00000042371; OTTHUMT00000042372	PDE7B	phosphodiesterase 7B	Multiple_Complex
TC1500009036.hg.1	10,93	10,15	0,09	0,05	T	T	1,72	5,95E-06	0,0003	T	NM_001220482; NM_002399; NM_170674; NM_170675; NM_170676; NM_170677; NM_172315; NM_172316; NR_051953; ENST00000314177; ENST00000338564; ENST00000340545; ENST00000397620; ENST00000397624; ENST00000424352; ENST00000557796; ENST00000557992; ENST00000558313; ENST00000558643; ENST00000559085; ENST00000559129; ENST00000559371; ENST00000559408; ENST00000559561; ENST00000559972; ENST00000560570; ENST0000…	MEIS2	Meis homeobox 2	Multiple_Complex
TC2200009271.hg.1	12,65	11,8	0,05	0,02	T	T	1,8	6,01E-06	0,0003	T	NM_014508; ENST00000361441; ENST00000428892; BC011739; OTTHUMT00000321241; OTTHUMT00000321242	APOBEC3C	apolipoprotein B mRNA editing enzyme, catalytic polypeptide-like 3C	Multiple_Complex
TC0200016679.hg.1	10,24	11,17	0,17	0,08	T	T	-1,91	6,05E-06	0,0003	T	NM_014755; ENST00000313349; BC074788; BC074789; BC101639; BC101641; OTTHUMT00000327322	SERTAD2	SERTA domain containing 2	Multiple_Complex
TC0100014276.hg.1	13,07	12,24	0,13	0,07	T	T	1,78	6,13E-06	0,0003	T	NM_014762; ENST00000371269; ENST00000436604; ENST00000535035; BC004375; BC011669; OTTHUMT00000027680; OTTHUMT00000027681	DHCR24	24-dehydrocholesterol reductase	Multiple_Complex
TC0600009772.hg.1	8,89	10,16	0,23	0,04	T	T	-2,42	6,13E-06	0,0003	T	NM_015278; ENST00000367467; ENST00000367469; ENST00000470750; ENST00000622663; OTTHUMT00000042619; OTTHUMT00000042620; OTTHUMT00000042621	SASH1	SAM and SH3 domain containing 1	Multiple_Complex
TC0700010854.hg.1	11,69	10,64	0,19	0,05	T	T	2,06	6,15E-06	0,0003	T	NM_002192; ENST00000242208; ENST00000442711; ENST00000464515; BC007858; OTTHUMT00000250793; OTTHUMT00000338448; OTTHUMT00000338449	INHBA	inhibin beta A	Multiple_Complex
TC1200012744.hg.1	6,78	5,18	0,26	0,37	T	T	3,04	6,11E-06	0,0003	T	NM_001733; ENST00000535233; ENST00000536053; ENST00000536092; ENST00000538050; ENST00000540242; ENST00000540394; ENST00000540610; ENST00000541042; ENST00000542285; ENST00000543362; ENST00000543835; ENST00000543851; ENST00000545466; ENST00000602298; BC035220; OTTHUMT00000398443; OTTHUMT00000398444; OTTHUMT00000398446; OTTHUMT00000398447; OTTHUMT00000398448; OTTHUMT00000398449; OTTHUMT00000398450; …	C1R	complement component 1, r subcomponent	Multiple_Complex
TC1700012433.hg.1	8,92	7,6	0,21	0,12	T	T	2,49	6,13E-06	0,0003	T	NM_018952; ENST00000225648; ENST00000470193; ENST00000484302; ENST00000490419; BC014651; OTTHUMT00000358146; OTTHUMT00000358147; OTTHUMT00000358241; OTTHUMT00000408086	HOXB6	homeobox B6	Multiple_Complex
TC0500012203.hg.1	7,83	8,98	0,05	0,15	T	T	-2,21	6,17E-06	0,0003	T	ENST00000503553.3; OTTHUMT00000472469; uc063hqq.1	PAIP2; CTB-43P18.1	poly(A) binding protein interacting protein 2 [Source:EntrezGene;Acc:51247]; novel transcript, antisense to PAIP2	NonCoding
TC1100010009.hg.1	6,93	5,75	0,28	0,15	T	F	2,27	6,26E-06	0,0003	F	NM_153445; ENST00000328375; OTTHUMT00000385697; uc010rbg.2	OR5P3	olfactory receptor, family 5, subfamily P, member 3	Coding
TC0800009094.hg.1	8,39	9,51	0,27	0,11	T	T	-2,17	6,29E-06	0,0003	T	NM_014957; ENST00000262585; ENST00000424248; ENST00000517813; ENST00000517985; ENST00000518198; ENST00000518249; ENST00000518347; ENST00000518668; ENST00000518806; ENST00000519291; ENST00000519811; ENST00000520482; ENST00000520571; ENST00000520725; ENST00000520986; ENST00000521477; ENST00000521835; ENST00000523015; ENST00000523058; ENST00000523066; ENST00000523308; ENST00000523530; BC133023; BC14…	DENND3	DENN/MADD domain containing 3	Multiple_Complex
TC1000006819.hg.1	8,65	9,65	0,07	0,1	T	T	-2	6,29E-06	0,0003	T	NM_018518; NM_182751; ENST00000378694; ENST00000378714; ENST00000459751; ENST00000479669; ENST00000481292; ENST00000484800; ENST00000485659; BC101727; BC143490; OTTHUMT00000046849; OTTHUMT00000046850; OTTHUMT00000356853; OTTHUMT00000356854; OTTHUMT00000356855; OTTHUMT00000356856; OTTHUMT00000356857; uc001imb.3	MCM10	minichromosome maintenance 10 replication initiation factor	Multiple_Complex
TC0200014819.hg.1	6	7,18	0,28	0,17	T	T	-2,27	6,50E-06	0,0003	T	NM_002977; ENST00000303354; ENST00000409435; ENST00000409672; ENST00000452182; ENST00000454569; ENST00000472119; OTTHUMT00000333636; OTTHUMT00000333637; OTTHUMT00000333638; OTTHUMT00000333639; OTTHUMT00000333640	SCN9A	sodium channel, voltage gated, type IX alpha subunit	Multiple_Complex
TC2100008545.hg.1	12,48	13,34	0,13	0,01	T	T	-1,82	6,53E-06	0,0003	T	NM_003489; ENST00000318948; ENST00000400199; ENST00000400202; ENST00000411932; BC040361; OTTHUMT00000157925; OTTHUMT00000157926; OTTHUMT00000157927; uc002yjx.2	NRIP1	nuclear receptor interacting protein 1	Multiple_Complex
TC1100012762.hg.1	9,13	7,42	0,22	0,15	T	T	3,27	6,56E-06	0,0003	T	hsa_circ_0007805	KIRREL3	Jeck2013 ALT_ACCEPTOR, ALT_DONOR, coding, INTERNAL, intronic best transcript NM_032531	NonCoding
TC1900010632.hg.1	10,95	10,07	0,05	0,01	T	T	1,84	6,59E-06	0,0003	T	NM_001193286; NM_012237; NM_030593; NR_034146; ENST00000249396; ENST00000358931; ENST00000381766; ENST00000392081; ENST00000407552; ENST00000414941; ENST00000420440; ENST00000423526; ENST00000437828; ENST00000443898; ENST00000447739; ENST00000451193; ENST00000462654; ENST00000476771; ENST00000479290; ENST00000481381; ENST00000491960; ENST00000496069; ENST00000613542; BC003012; BC003547; OTTHUMT00…	SIRT2	sirtuin 2	Multiple_Complex
TC0200016403.hg.1	11,05	9,98	0,11	0,21	T	T	2,11	6,65E-06	0,0003	T	NM_001261427; NM_001261428; NM_001261429; NM_145693; NR_036071; ENST00000256720; ENST00000396097; ENST00000396098; ENST00000396099; ENST00000404113; ENST00000423495; ENST00000425416; ENST00000441684; ENST00000449576; ENST00000454151; ENST00000460096; ENST00000464517; ENST00000464953; ENST00000475286; ENST00000475922; ENST00000480315; ENST00000487346; ENST00000487576; ENST00000495907; ENST00000581…	LPIN1; MIR548S	lipin 1; microRNA 548s	Multiple_Complex
TC0700007807.hg.1	10,89	11,78	0,05	0,08	T	T	-1,86	6,68E-06	0,0003	T	NM_001287532; NM_001287533; NM_001287534; NM_007139; NM_152626; ENST00000328747; ENST00000357512; ENST00000431504; ENST00000450302; ENST00000488849; BC036439; BC040594; OTTHUMT00000344589; OTTHUMT00000344590; OTTHUMT00000344591; OTTHUMT00000345490	ZNF92	zinc finger protein 92	Multiple_Complex
TC1100008236.hg.1	12,96	13,9	0,03	0,09	T	T	-1,92	6,70E-06	0,0003	T	NM_053056; ENST00000227507; ENST00000535993; ENST00000536559; ENST00000539241; ENST00000542367; ENST00000545484; BC000076; BC001501; BC014078; BC023620; BC025302; OTTHUMT00000396775; OTTHUMT00000396812; OTTHUMT00000396813; OTTHUMT00000396814; OTTHUMT00000396815; OTTHUMT00000396816	CCND1	cyclin D1	Multiple_Complex
TC0100018356.hg.1	8,15	9,34	0,13	0,19	T	T	-2,27	6,75E-06	0,0003	T	NR_037962	RHOU	ras homolog family member U	NonCoding
TC1700010731.hg.1	8,92	9,96	0,11	0,12	T	T	-2,06	6,79E-06	0,0003	T	NM_001256014; NM_001256015; NM_001256016; NM_013290; NM_016556; NR_045669; NR_045670; NR_045671; ENST00000253789; ENST00000393795; ENST00000586337; ENST00000587209; ENST00000587268; ENST00000588544; ENST00000589505; ENST00000590760; ENST00000590931; BC008792; OTTHUMT00000450427; OTTHUMT00000450428; OTTHUMT00000450429; OTTHUMT00000450430; OTTHUMT00000450431; OTTHUMT00000450432; OTTHUMT00000450433;…	PSMC3IP	PSMC3 interacting protein	Multiple_Complex
TC2100006659.hg.1	11,78	12,73	0,06	0,11	T	T	-1,93	6,80E-06	0,0003	T	NM_001207063; NM_001207064; NM_001207065; NM_001207066; NM_001338; ENST00000284878; ENST00000356275; ENST00000400165; ENST00000400166; ENST00000400169; BC003684; BC010536; OTTHUMT00000158209; OTTHUMT00000158210; OTTHUMT00000158211; OTTHUMT00000158212; OTTHUMT00000340163	CXADR	coxsackie virus and adenovirus receptor	Multiple_Complex
TC1600007959.hg.1	13,41	14,27	0	0,15	T	T	-1,81	6,92E-06	0,0003	T	NM_175617; ENST00000306061; ENST00000330439; ENST00000568293; BC009699; BC062734; BC131609; OTTHUMT00000256600; OTTHUMT00000434375; OTTHUMT00000434376	MT1E	metallothionein 1E	Multiple_Complex
TC0200008806.hg.1	11,68	10,43	0,1	0,22	T	T	2,37	6,97E-06	0,0003	T	NM_001193482; NM_001193483; NM_001193484; NM_001193485; NM_001193488; NM_004987; ENST00000332345; ENST00000338045; ENST00000393310; ENST00000409441; ENST00000410093; ENST00000414829; ENST00000422797; ENST00000428064; ENST00000434274; ENST00000449684; ENST00000462817; ENST00000474038; ENST00000496653; ENST00000542845; ENST00000544547; BC005341; OTTHUMT00000253596; OTTHUMT00000330217; OTTHUMT000003…	LIMS1	LIM and senescent cell antigen-like domains 1	Multiple_Complex
TC0900011148.hg.1	11,74	12,6	0,13	0,08	T	T	-1,82	7,02E-06	0,0003	T	NM_001286974; NM_003798; ENST00000325551; ENST00000374593; ENST00000374594; ENST00000374595; ENST00000488130; BC117208; BC117234; OTTHUMT00000053577; OTTHUMT00000053578; OTTHUMT00000053579; OTTHUMT00000053580; OTTHUMT00000053581	CTNNAL1	catenin (cadherin-associated protein), alpha-like 1	Multiple_Complex
TC0500011852.hg.1	8,05	9,05	0,19	0,1	T	T	-2,01	7,18E-06	0,0003	T	NM_001178102; NM_002317; ENST00000231004; ENST00000503759; ENST00000505593; ENST00000508067; ENST00000513319; BC074820; BC074872; BC089436; OTTHUMT00000250887; OTTHUMT00000371232; OTTHUMT00000371233; OTTHUMT00000371235; OTTHUMT00000371236	LOX	lysyl oxidase	Multiple_Complex
TC0600007196.hg.1	10,21	11,31	0,05	0,19	T	T	-2,14	7,18E-06	0,0003	T	NM_001286264; NM_001286265; NM_001286266; NM_020662; NR_104423; ENST00000274747; ENST00000378353; ENST00000378386; ENST00000443868; ENST00000446191; ENST00000483634; BC069009; OTTHUMT00000040002; OTTHUMT00000040003; OTTHUMT00000040004; OTTHUMT00000040006	MRS2	MRS2 magnesium transporter	Multiple_Complex
TC1500009702.hg.1	11,87	10,76	0,13	0,11	T	T	2,17	7,17E-06	0,0003	T	NM_015920; ENST00000330964; ENST00000411926; ENST00000439025; ENST00000455271; ENST00000462430; ENST00000482846; ENST00000559763; BC003667; OTTHUMT00000339347; OTTHUMT00000339348; OTTHUMT00000339349; OTTHUMT00000339350; OTTHUMT00000339351; OTTHUMT00000339352; OTTHUMT00000417740	RPS27L	ribosomal protein S27-like	Multiple_Complex
TC2200008847.hg.1	8,65	9,89	0,17	0,14	T	T	-2,36	7,25E-06	0,0003	T	NM_001002876; NM_001110215; NM_001304370; NM_001304371; NM_001304372; NM_001304373; NM_024053; ENST00000215980; ENST00000396437; ENST00000402338; ENST00000402420; ENST00000404067; ENST00000407253; ENST00000460824; ENST00000472374; BC000705; BC007495; OTTHUMT00000322058; OTTHUMT00000322059; OTTHUMT00000322060; OTTHUMT00000322061; OTTHUMT00000322062; OTTHUMT00000322064; OTTHUMT00000322065; OTTHUMT0…	CENPM	centromere protein M	Multiple_Complex
TC1600011292.hg.1	9,45	10,55	0,2	0,06	T	T	-2,14	7,32E-06	0,0003	T	NM_000135; NM_001018112; NM_001286167; ENST00000305699; ENST00000389301; ENST00000389302; ENST00000534992; ENST00000543736; ENST00000561660; ENST00000561667; ENST00000561722; ENST00000562424; ENST00000563318; ENST00000563510; ENST00000563513; ENST00000563673; ENST00000563767; ENST00000564475; ENST00000564870; ENST00000564969; ENST00000565582; ENST00000566133; ENST00000566409; ENST00000566889; ENS…	FANCA	Fanconi anemia complementation group A	Multiple_Complex
TC1400010198.hg.1	6,02	4,35	0,33	0,27	T	F	3,2	7,41E-06	0,0003	F	NM_001159531; NM_020836; ENST00000355173; ENST00000443071; ENST00000553553; ENST00000554140; ENST00000554274; ENST00000554356; ENST00000554747; ENST00000556188; ENST00000556751; ENST00000557378; BC002607; OTTHUMT00000414329; OTTHUMT00000414330; OTTHUMT00000414331; OTTHUMT00000414332; OTTHUMT00000414333; OTTHUMT00000414334; OTTHUMT00000414335; OTTHUMT00000414336; OTTHUMT00000414337	BEGAIN	brain-enriched guanylate kinase-associated	Multiple_Complex
TC0800007787.hg.1	5,05	6,71	0,56	0,18	F	T	-3,16	7,44E-06	0,0003	F	NM_173519; ENST00000325897; ENST00000518426; ENST00000518592; ENST00000518858; ENST00000519846; ENST00000520712; ENST00000521189; ENST00000522621; ENST00000522928; ENST00000523868; ENST00000524095; BC042617; OTTHUMT00000378323; OTTHUMT00000378324; OTTHUMT00000378325; OTTHUMT00000378326; OTTHUMT00000378327; OTTHUMT00000378328; OTTHUMT00000378329; OTTHUMT00000378363; OTTHUMT00000378364; OTTHUMT0000…	CLVS1	clavesin 1	Multiple_Complex
TC0800010765.hg.1	16,55	15,71	0,08	0,01	T	T	1,79	7,49E-06	0,0003	T	NM_014294; ENST00000262213; ENST00000518678; ENST00000520700; ENST00000521049; ENST00000521425; BC000687; BC037738; OTTHUMT00000378737; OTTHUMT00000378738; OTTHUMT00000378739; OTTHUMT00000378740; OTTHUMT00000378741	TRAM1	translocation associated membrane protein 1	Multiple_Complex
TC1900011895.hg.1	7,27	6,09	0,27	0,13	T	T	2,26	7,53E-06	0,0003	T	ENST00000587451; ENST00000592864; OTTHUMT00000453128; OTTHUMT00000453129	CACNA1A	calcium channel, voltage-dependent, P/Q type, alpha 1A subunit	Multiple_Complex
TSUnmapped00000099.hg.1	8,37	6,21	0,52	0,39	T	T	4,47	7,61E-06	0,0003	T	ENST00000625920	OR5P2	olfactory receptor, family 5, subfamily P, member 2	Coding
TC0100010623.hg.1	9,32	10,25	0,03	0,14	T	T	-1,91	7,74E-06	0,0003	T	NM_001282750; NM_001282751; NM_014283; NM_016227; ENST00000263688; ENST00000367723; ENST00000486569; ENST00000608151; ENST00000608566; ENST00000608673; ENST00000608804; ENST00000609685; ENST00000610051; ENST00000616058; BC137125; OTTHUMT00000084273; OTTHUMT00000084274; OTTHUMT00000098114; OTTHUMT00000472233; OTTHUMT00000472234; OTTHUMT00000472235; OTTHUMT00000472236; OTTHUMT00000472237	SUCO	SUN domain containing ossification factor	Multiple_Complex
TC0800007460.hg.1	13,15	12,16	0,12	0,1	T	T	1,98	7,81E-06	0,0003	T	NM_152419; ENST00000379644; ENST00000517319; ENST00000519000; ENST00000519705; ENST00000520678; ENST00000520704; ENST00000521576; ENST00000522082; ENST00000523989; ENST00000524016; OTTHUMT00000377293; OTTHUMT00000377294; OTTHUMT00000377295; OTTHUMT00000377296; OTTHUMT00000377297; OTTHUMT00000377298; OTTHUMT00000377299; OTTHUMT00000377300; OTTHUMT00000377301; OTTHUMT00000377302	HGSNAT	heparan-alpha-glucosaminide N-acetyltransferase	Multiple_Complex
TC1200012254.hg.1	8,42	7,24	0,21	0,26	T	T	2,27	7,84E-06	0,0003	T	NM_024667; ENST00000267202; ENST00000371248; ENST00000535765; ENST00000543590; BC005882; OTTHUMT00000400946; OTTHUMT00000400947; OTTHUMT00000400948; OTTHUMT00000400949	VPS37B	vacuolar protein sorting 37 homolog B (S. cerevisiae)	Multiple_Complex
TC1200006450.hg.1	11,72	10,37	0,21	0,19	T	T	2,55	7,91E-06	0,0003	T	NM_001184985; NM_014823; NM_018979; NM_213655; ENST00000315939; ENST00000340908; ENST00000447667; ENST00000530271; ENST00000534872; ENST00000535572; ENST00000535698; ENST00000537603; ENST00000537687; ENST00000538787; ENST00000540360; ENST00000540885; ENST00000542424; ENST00000542543; ENST00000543065; ENST00000544559; ENST00000544965; ENST00000545055; ENST00000545285; ENST00000574564; ENST00000574…	WNK1	WNK lysine deficient protein kinase 1	Multiple_Complex
TC0700010443.hg.1	9,3	8,23	0,14	0,16	T	T	2,1	8,03E-06	0,0003	T	NM_001164460; NM_207342; ENST00000404369; ENST00000406890; ENST00000424363; ENST00000439708; ENST00000483679; BC066301; OTTHUMT00000326617; OTTHUMT00000326618; OTTHUMT00000326619; OTTHUMT00000326797; OTTHUMT00000326798	STEAP1B	STEAP family member 1B	Multiple_Complex
TC0500012312.hg.1	6,82	8,77	0,44	0,25	T	T	-3,87	8,08E-06	0,0004	T	NM_001127496; NM_001293289; NM_001293290; NM_030964; ENST00000344120; ENST00000434127; ENST00000503582; ENST00000509364; ENST00000511815; BC125095; BC125096; OTTHUMT00000251864; OTTHUMT00000370652; OTTHUMT00000370654; OTTHUMT00000370655; OTTHUMT00000370656	SPRY4	sprouty RTK signaling antagonist 4	Multiple_Complex
TC0200014004.hg.1	10,72	11,7	0,1	0,12	T	T	-1,98	8,13E-06	0,0004	T	NM_019044; ENST00000319432; ENST00000376300; ENST00000437999; ENST00000460781; ENST00000466171; ENST00000470650; ENST00000474006; ENST00000474546; ENST00000488908; BC028609; BC093018; OTTHUMT00000129615; OTTHUMT00000129616; OTTHUMT00000129617; OTTHUMT00000129618; OTTHUMT00000129619; OTTHUMT00000129620; OTTHUMT00000129621; OTTHUMT00000129622; OTTHUMT00000280685	CCDC93	coiled-coil domain containing 93	Multiple_Complex
TC0100009403.hg.1	8,84	7,55	0,18	0,23	T	T	2,43	8,19E-06	0,0004	T	NM_001025197; NM_001025199; NM_004000; ENST00000369744; ENST00000369748; ENST00000445067; ENST00000466741; ENST00000467038; ENST00000472825; ENST00000474304; ENST00000477185; ENST00000486561; ENST00000497220; ENST00000497587; ENST00000524472; ENST00000526684; ENST00000528451; ENST00000529459; ENST00000530597; ENST00000533831; BC011460; OTTHUMT00000033669; OTTHUMT00000033670; OTTHUMT00000033672; O…	CHI3L2	chitinase 3-like 2	Multiple_Complex
TC1200006786.hg.1	9,36	8,24	0,13	0,2	T	T	2,17	8,21E-06	0,0004	T	NM_001079815; NM_153022; ENST00000298530; ENST00000334148; ENST00000381923; ENST00000543484; ENST00000545924; ENST00000546153; BC098571; BC131523; OTTHUMT00000399645; OTTHUMT00000399646; OTTHUMT00000399647; OTTHUMT00000399648; OTTHUMT00000399649; OTTHUMT00000399650	TMEM52B	transmembrane protein 52B	Multiple_Complex
TC0500011705.hg.1	11,91	10,66	0,11	0,06	T	T	2,37	8,23E-06	0,0004	T	NM_001142474; NM_001142475; NM_001142476; NM_001142477; NM_001142478; NM_001142479; NM_001142480; NM_001142481; NM_001142482; NM_001142483; NM_004772; ENST00000257435; ENST00000379671; ENST00000395634; ENST00000419114; ENST00000446294; ENST00000447165; ENST00000450761; ENST00000453526; ENST00000455559; ENST00000503429; ENST00000504018; ENST00000505864; ENST00000507032; ENST00000507742; ENST000005…	NREP	neuronal regeneration related protein	Multiple_Complex
TC0100010379.hg.1	13,36	14,39	0,08	0,15	T	T	-2,04	8,29E-06	0,0004	T	NM_001184763; NM_144624; NM_175866; ENST00000282169; ENST00000489294; ENST00000538489; ENST00000545294; BC026046; OTTHUMT00000076788; OTTHUMT00000076789; uc009wuu.2	UHMK1	U2AF homology motif (UHM) kinase 1	Multiple_Complex
TC0100018246.hg.1	9,28	10,25	0,09	0,06	T	T	-1,97	8,28E-06	0,0004	T	NM_032270; ENST00000370454; ENST00000416805; ENST00000479252; ENST00000482063; BC113973; OTTHUMT00000028435; OTTHUMT00000029206; OTTHUMT00000097360; OTTHUMT00000097361	LRRC8C	leucine rich repeat containing 8 family, member C	Multiple_Complex
TC0200016494.hg.1	8,03	9,34	0,14	0,24	T	T	-2,48	8,27E-06	0,0004	T	NM_020184; ENST00000377075; ENST00000482716; ENST00000493384; ENST00000496186; BC063295; OTTHUMT00000252954; OTTHUMT00000339073; OTTHUMT00000339074; OTTHUMT00000339075; uc002swx.3	CNNM4	cyclin and CBS domain divalent metal cation transport mediator 4	Multiple_Complex
TC1900011894.hg.1	12,35	10,4	0,38	0,32	T	T	3,84	8,33E-06	0,0004	T	NM_000068; NM_001127221; NM_001127222; NM_001174080; NM_023035; ENST00000360228; ENST00000573710; ENST00000573891; ENST00000574822; ENST00000585802; ENST00000586190; ENST00000587525; ENST00000590205; ENST00000593160; ENST00000593267; ENST00000614285; OTTHUMT00000104062; OTTHUMT00000439639; OTTHUMT00000439640; OTTHUMT00000439641; OTTHUMT00000453122; OTTHUMT00000453123; OTTHUMT00000453124; OTTHUMT0…	CACNA1A	calcium channel, voltage-dependent, P/Q type, alpha 1A subunit	Multiple_Complex
TC0300008952.hg.1	11,71	10,77	0,11	0,06	T	T	1,91	8,47E-06	0,0004	T	NM_001033030; NM_001033031; NM_001033032; NM_018147; ENST00000338446; ENST00000360570; ENST00000393034; ENST00000393035; ENST00000464668; ENST00000464912; ENST00000470889; ENST00000479848; ENST00000491175; BC012478; OTTHUMT00000357977; OTTHUMT00000357978; OTTHUMT00000357979; OTTHUMT00000357980; OTTHUMT00000357981; OTTHUMT00000357982; OTTHUMT00000357983; OTTHUMT00000357984; OTTHUMT00000357985	FAIM	Fas apoptotic inhibitory molecule	Multiple_Complex
TC0600013126.hg.1	12,21	11,22	0,16	0,13	T	T	1,99	8,43E-06	0,0004	T	NM_001291983; NM_001291984; NM_002844; ENST00000368202; ENST00000368205; ENST00000368207; ENST00000368210; ENST00000368213; ENST00000368215; ENST00000368226; ENST00000392449; ENST00000415046; ENST00000415055; ENST00000429595; ENST00000434424; ENST00000490332; ENST00000495748; ENST00000498284; ENST00000524481; ENST00000524534; ENST00000525459; ENST00000531050; ENST00000531466; ENST00000532331; ENS…	PTPRK	protein tyrosine phosphatase, receptor type, K	Multiple_Complex
TC0800009868.hg.1	11,18	12,3	0,15	0,09	T	T	-2,17	8,39E-06	0,0004	T	NM_003842; NM_147187; NR_027140; ENST00000276431; ENST00000347739; ENST00000518531; ENST00000519028; ENST00000519910; ENST00000520109; ENST00000523504; ENST00000523752; BC001281; OTTHUMT00000215099; OTTHUMT00000215100; OTTHUMT00000375236; OTTHUMT00000375237; OTTHUMT00000375238; OTTHUMT00000375239; OTTHUMT00000375240; OTTHUMT00000375241	TNFRSF10B	tumor necrosis factor receptor superfamily, member 10b	Multiple_Complex
TC0800010766.hg.1	10,42	9,58	0,15	0,09	T	T	1,78	8,46E-06	0,0004	T	NM_016027; ENST00000276590; ENST00000517601; ENST00000522447; ENST00000522558; BC000878; OTTHUMT00000378747; OTTHUMT00000378748; OTTHUMT00000378749; OTTHUMT00000378750	LACTB2	lactamase, beta 2	Multiple_Complex
TC0X00006715.hg.1	10,97	11,86	0,05	0,1	T	T	-1,86	8,45E-06	0,0004	T	NM_001037535; NM_001037536; NM_001037540; NM_006746; ENST00000380041; ENST00000380043; ENST00000380045; ENST00000398080; ENST00000419185; ENST00000427362; ENST00000487842; BC026159; BC105028; OTTHUMT00000055934; OTTHUMT00000060493; OTTHUMT00000060494; OTTHUMT00000060495; OTTHUMT00000060496; OTTHUMT00000060497	SCML1	sex comb on midleg-like 1 (Drosophila)	Multiple_Complex
TC0Y00006651.hg.1	6,99	5,85	0,12	0,2	T	T	2,2	8,48E-06	0,0004	T	NM_001164238; NM_001206850; NM_014893; NR_028319; NR_046355; ENST00000297967; ENST00000339174; ENST00000355905; ENST00000382868; ENST00000382872; ENST00000413217; ENST00000471252; ENST00000476359; ENST00000481089; BC113525; BC113551; OTTHUMT00000089061; OTTHUMT00000089062; OTTHUMT00000089063; OTTHUMT00000089064; OTTHUMT00000089065; OTTHUMT00000089066; OTTHUMT00000089067; OTTHUMT00000089068; uc004…	NLGN4Y	neuroligin 4, Y-linked	Multiple_Complex
TC1000007461.hg.1	9,5	8,38	0,12	0,31	T	T	2,17	8,46E-06	0,0004	T	NM_032023; ENST00000340258; ENST00000427758; ENST00000428466; ENST00000462822; ENST00000465735; ENST00000471808; ENST00000471941; ENST00000472561; ENST00000483709; ENST00000484477; ENST00000489171; ENST00000493490; BC032593; OTTHUMT00000047745; OTTHUMT00000047746; OTTHUMT00000047747; OTTHUMT00000047748; OTTHUMT00000047749; OTTHUMT00000047750; OTTHUMT00000047751; OTTHUMT00000047752; OTTHUMT0000004…	RASSF4	Ras association (RalGDS/AF-6) domain family member 4	Multiple_Complex
TC1200008474.hg.1	11,05	9,92	0,03	0,26	T	T	2,18	8,50E-06	0,0004	T	NM_001270467; NM_001270468; NM_001270469; NM_001270470; NM_001270471; NM_003877; ENST00000340600; ENST00000536696; ENST00000547229; ENST00000548091; ENST00000548537; ENST00000549122; ENST00000549206; ENST00000549510; ENST00000549887; ENST00000551556; ENST00000551883; ENST00000622746; BC010399; OTTHUMT00000407731; OTTHUMT00000407732; OTTHUMT00000407733; OTTHUMT00000407736; OTTHUMT00000407737; OTTH…	SOCS2	suppressor of cytokine signaling 2	Coding
TC0300008002.hg.1	11,12	10,21	0,12	0,13	T	T	1,88	8,56E-06	0,0004	T	NM_001244644; NM_014043; ENST00000263780; ENST00000466696; ENST00000471660; ENST00000472024; ENST00000494980; BC001553; OTTHUMT00000352779; OTTHUMT00000352809; OTTHUMT00000352810; OTTHUMT00000352811; OTTHUMT00000352812	CHMP2B	charged multivesicular body protein 2B	Multiple_Complex
TC1000011807.hg.1	12,55	13,36	0,01	0,11	T	T	-1,76	8,62E-06	0,0004	T	NM_005871; ENST00000369592; ENST00000369603; ENST00000460483; ENST00000471297; ENST00000477763; BC011234; OTTHUMT00000050325; OTTHUMT00000050326; OTTHUMT00000050327; OTTHUMT00000050328; OTTHUMT00000050329	SMNDC1	survival motor neuron domain containing 1	Multiple_Complex
TC0700006890.hg.1	10,6	11,5	0,08	0,1	T	T	-1,87	8,77E-06	0,0004	T	NM_000600; ENST00000258743; ENST00000401630; ENST00000401651; ENST00000404625; ENST00000406575; ENST00000407492; ENST00000426291; ENST00000464710; ENST00000485300; BC015511; OTTHUMT00000250225; OTTHUMT00000320073; OTTHUMT00000320074; OTTHUMT00000320075; OTTHUMT00000320076; OTTHUMT00000320077; OTTHUMT00000320078; OTTHUMT00000320079	IL6	interleukin 6	Multiple_Complex
TC0800010490.hg.1	10,56	9,65	0,25	0,09	T	T	1,88	8,79E-06	0,0004	T	NM_001286657; NM_001286660; NM_001286661; NM_152417; ENST00000334667; ENST00000434581; ENST00000517576; ENST00000519460; ENST00000519780; ENST00000519784; ENST00000520061; ENST00000520414; ENST00000521229; ENST00000522030; ENST00000522090; ENST00000522470; ENST00000522576; ENST00000523073; ENST00000523180; ENST00000523423; ENST00000524121; ENST00000617782; ENST00000617977; BC020835; BC071636; OTT…	TMEM68	transmembrane protein 68	Multiple_Complex
TC1600010181.hg.1	7,21	5,59	0,21	0,12	T	T	3,07	8,90E-06	0,0004	T	NM_001201477; NM_018092; ENST00000303155; ENST00000562435; ENST00000562559; ENST00000563078; ENST00000564667; OTTHUMT00000256766; OTTHUMT00000430390; OTTHUMT00000430391; OTTHUMT00000430392; OTTHUMT00000430393	NETO2	neuropilin (NRP) and tolloid (TLL)-like 2	Multiple_Complex
TC1700011366.hg.1	11,12	12,06	0,04	0,15	T	T	-1,92	8,96E-06	0,0004	T	NM_020748; NR_026641; ENST00000251334; ENST00000444766; ENST00000578805; ENST00000583076; ENST00000583822; ENST00000584967; ENST00000617492; OTTHUMT00000445368; OTTHUMT00000445369; OTTHUMT00000445370; OTTHUMT00000445371; OTTHUMT00000445372; OTTHUMT00000445373	INTS2	integrator complex subunit 2	Multiple_Complex
TC0600010707.hg.1	6,22	4,73	0,39	0,38	T	F	2,8	8,98E-06	0,0004	F	NM_001278710; NM_001278711; NM_016588; ENST00000244766; ENST00000495850; ENST00000616243; ENST00000622188; BC002683; BC042019; OTTHUMT00000039753; OTTHUMT00000039754	NRN1	neuritin 1	Multiple_Complex
TC0100013623.hg.1	10,57	9,4	0,21	0,2	T	T	2,25	9,06E-06	0,0004	T	NM_001161708; NM_030786; ENST00000373484; ENST00000409190; ENST00000417633; ENST00000426909; OTTHUMT00000022129; OTTHUMT00000327141; OTTHUMT00000327142; OTTHUMT00000476532	SYNC	syncoilin, intermediate filament protein	Multiple_Complex
TC1700011451.hg.1	13,24	14,07	0,12	0,03	T	T	-1,78	9,05E-06	0,0004	T	NM_022739; ENST00000262435; ENST00000578200; ENST00000578386; ENST00000580072; ENST00000580246; ENST00000582081; ENST00000585301; BC093876; BC111945; OTTHUMT00000445225; OTTHUMT00000445226; OTTHUMT00000445227; OTTHUMT00000445228; OTTHUMT00000445229; OTTHUMT00000445230; OTTHUMT00000445231	SMURF2	SMAD specific E3 ubiquitin protein ligase 2	Multiple_Complex
TC0100015596.hg.1	11,98	10,99	0,16	0,05	T	T	2	9,10E-06	0,0004	T	NM_153713; ENST00000604000; BC035727; OTTHUMT00000038513	LIX1L	limb and CNS expressed 1 like	Multiple_Complex
TC2000009924.hg.1	8,79	9,65	0,12	0,06	T	T	-1,82	9,09E-06	0,0004	T	NM_001048221; NM_001048222; NM_001048223; NM_001048224; NM_001048225; NM_001048226; NM_001197139; NM_001197140; NM_018478; ENST00000357275; ENST00000360981; ENST00000372710; ENST00000372712; ENST00000372717; ENST00000372720; ENST00000372722; ENST00000372723; ENST00000443296; BC001105; BC012818; OTTHUMT00000079438; OTTHUMT00000079439; OTTHUMT00000079440; OTTHUMT00000079441; OTTHUMT00000079442; OTT…	DBNDD2	dysbindin (dystrobrevin binding protein 1) domain containing 2	Multiple_Complex
TC0300007748.hg.1	9,8	10,67	0,18	0,13	T	T	-1,83	9,12E-06	0,0004	T	NM_000248; NM_001184967; NM_001184968; NM_006722; NM_198158; NM_198159; NM_198177; NM_198178; ENST00000314557; ENST00000314589; ENST00000328528; ENST00000352241; ENST00000394348; ENST00000394351; ENST00000429090; ENST00000433517; ENST00000448226; ENST00000451708; ENST00000457080; ENST00000461014; ENST00000461511; ENST00000472437; ENST00000478490; ENST00000495741; ENST00000531774; BC026961; BC0652…	MITF	microphthalmia-associated transcription factor	Multiple_Complex
TC0600008468.hg.1	10,48	11,38	0,07	0,13	T	T	-1,86	9,23E-06	0,0004	T	NM_001105531; NM_001162529; NM_020819; ENST00000194672; ENST00000361499; ENST00000370479; ENST00000393299; ENST00000418814; ENST00000425415; ENST00000457062; ENST00000505675; ENST00000505769; ENST00000505868; ENST00000507049; ENST00000507085; ENST00000508844; ENST00000514185; ENST00000515280; ENST00000515323; BC131782; OTTHUMT00000041137; OTTHUMT00000041138; OTTHUMT00000041139; OTTHUMT00000360643…	FAM135A	family with sequence similarity 135, member A	Multiple_Complex
TC2200008036.hg.1	7,42	8,61	0,22	0,13	T	T	-2,27	9,33E-06	0,0004	T	OTTHUMT00000075837; OTTHUMT00000319621; OTTHUMT00000322200	USP41	ubiquitin specific peptidase 41	Multiple_Complex
TC0200008923.hg.1	6	7,03	0,17	0,24	T	T	-2,04	9,35E-06	0,0004	T	NM_001137604; NM_001282772; NM_001282774; NM_001282776; NM_001282777; NM_001282779; NM_019014; ENST00000263331; ENST00000333990; ENST00000409894; ENST00000417433; ENST00000424062; ENST00000430293; ENST00000430769; ENST00000438748; ENST00000448770; ENST00000458012; ENST00000468475; ENST00000475318; ENST00000484574; ENST00000496238; ENST00000498054; ENST00000537335; ENST00000541869; BC110833; OTTHU…	POLR1B	polymerase (RNA) I polypeptide B	Multiple_Complex
TC0400012618.hg.1	12,14	13,06	0,12	0,19	T	T	-1,89	9,55E-06	0,0004	T	NM_004346; NM_032991; ENST00000308394; ENST00000393585; ENST00000393588; ENST00000447121; ENST00000517513; ENST00000523916; ENST00000613118; BC016926; OTTHUMT00000257885; OTTHUMT00000257886; OTTHUMT00000257887; OTTHUMT00000257888; OTTHUMT00000374074; OTTHUMT00000374075; uc003iwh.3	CASP3	caspase 3	Multiple_Complex
TC0200016224.hg.1	5,33	6,92	0,27	0,31	F	T	-3,01	9,58E-06	0,0004	F	NM_022817; ENST00000254657; ENST00000355768; ENST00000431832; ENST00000491417; OTTHUMT00000257167; OTTHUMT00000316844; OTTHUMT00000328356; OTTHUMT00000328357	PER2	period circadian clock 2	Multiple_Complex
TC0800009752.hg.1	14,76	13,97	0,01	0,08	T	T	1,73	9,66E-06	0,0004	T	NM_001127505; NM_004315; NM_177924; ENST00000262097; ENST00000314146; ENST00000381733; ENST00000517409; ENST00000518087; ENST00000518746; ENST00000519468; ENST00000519545; ENST00000520051; ENST00000520781; ENST00000521542; ENST00000523593; ENST00000523744; BC016481; BC016828; OTTHUMT00000214077; OTTHUMT00000214078; OTTHUMT00000375012; OTTHUMT00000375013; OTTHUMT00000375260; OTTHUMT00000375261; OT…	ASAH1	N-acylsphingosine amidohydrolase (acid ceramidase) 1	Multiple_Complex
TC1500009182.hg.1	9,43	8,48	0,12	0,17	T	T	1,93	9,65E-06	0,0004	T	NM_001301138; NM_015289; ENST00000318006; ENST00000348544; ENST00000561797; ENST00000561818; ENST00000562258; ENST00000562662; ENST00000563692; ENST00000564994; ENST00000568029; ENST00000568357; ENST00000568755; ENST00000570023; ENST00000570062; ENST00000614932; BC068559; OTTHUMT00000252861; OTTHUMT00000420470; OTTHUMT00000420471; OTTHUMT00000420472; OTTHUMT00000420473; OTTHUMT00000420474; OTTHUM…	VPS39	vacuolar protein sorting 39 homolog (S. cerevisiae)	Multiple_Complex
TC0600008166.hg.1	8,16	7,06	0,19	0,1	T	T	2,14	9,70E-06	0,0004	T	NM_001204051; NM_001204052; NM_004277; ENST00000371347; ENST00000411689; ENST00000603486; ENST00000603501; ENST00000604127; ENST00000604217; ENST00000604616; ENST00000604908; BC033091; OTTHUMT00000040791; OTTHUMT00000040792; OTTHUMT00000040793; OTTHUMT00000040794; OTTHUMT00000040795; OTTHUMT00000040796; OTTHUMT00000040797; uc003oyg.3	SLC25A27	solute carrier family 25, member 27	Multiple_Complex
TC1200007740.hg.1	8,01	5,72	0,38	0,29	T	F	4,9	9,71E-06	0,0004	F	NM_022658; ENST00000040584; BC053898; OTTHUMT00000358957	HOXC8	homeobox C8	Multiple_Complex
TC0500008307.hg.1	5,68	4,52	0,34	0,05	T	F	2,25	9,81E-06	0,0004	F	NM_033035; NM_138551; NR_045089; ENST00000344895; ENST00000379706; ENST00000420978; BC040592; OTTHUMT00000250717; OTTHUMT00000250718; OTTHUMT00000372500	TSLP	thymic stromal lymphopoietin	Multiple_Complex
TC0X00011277.hg.1	11,76	10,83	0,12	0,05	T	T	1,9	9,82E-06	0,0004	T	NM_007220; ENST00000318636; ENST00000380313; ENST00000380319; ENST00000454127; ENST00000474624; ENST00000478341; ENST00000478923; ENST00000479740; ENST00000496188; BC028142; OTTHUMT00000055885; OTTHUMT00000055886; OTTHUMT00000055888; OTTHUMT00000354933; OTTHUMT00000354934; OTTHUMT00000354935; OTTHUMT00000354936; OTTHUMT00000354938	CA5B	carbonic anhydrase VB, mitochondrial	Multiple_Complex
TC0700011054.hg.1	9,78	8,73	0,14	0,03	T	T	2,07	9,84E-06	0,0004	T	NM_001001549; NM_001001550; NM_001001555; NM_005311; ENST00000335866; ENST00000357271; ENST00000398810; ENST00000398812; ENST00000401949; ENST00000402497; ENST00000402578; ENST00000403097; ENST00000406641; ENST00000407526; ENST00000428711; ENST00000439044; ENST00000461886; ENST00000465602; ENST00000467386; ENST00000470992; ENST00000473696; ENST00000478162; ENST00000482397; ENST00000483157; ENST00…	GRB10	growth factor receptor bound protein 10	Multiple_Complex
TC0100009215.hg.1	9,71	10,81	0,14	0,2	T	T	-2,14	9,88E-06	0,0004	T	NM_003672; NM_033312; NM_033313; ENST00000336454; ENST00000361544; ENST00000370124; ENST00000455467; ENST00000469387; BC093916; BC093918; OTTHUMT00000030220; OTTHUMT00000030221; OTTHUMT00000030222; OTTHUMT00000030223; OTTHUMT00000030224	CDC14A	cell division cycle 14A	Multiple_Complex
TC0100010393.hg.1	11,31	12,46	0,17	0,13	T	T	-2,22	9,91E-06	0,0004	T	NM_001102445; NM_001113380; NM_001113381; NM_005613; ENST00000367906; ENST00000367908; ENST00000367909; ENST00000421743; ENST00000491263; ENST00000527393; ENST00000527809; ENST00000528938; ENST00000531057; ENST00000533019; BC000737; BC051869; OTTHUMT00000083197; OTTHUMT00000083198; OTTHUMT00000083199; OTTHUMT00000083200; OTTHUMT00000382515; OTTHUMT00000382516; OTTHUMT00000382517; OTTHUMT000003827…	RGS4	regulator of G-protein signaling 4	Multiple_Complex
TC1000012522.hg.1	8,8	7,95	0,08	0,02	T	T	1,8	9,92E-06	0,0004	T	NM_001100912; NM_152751; ENST00000341083; ENST00000378605; ENST00000440282; ENST00000463303; ENST00000469555; ENST00000480703; ENST00000486542; ENST00000492675; BC031618; OTTHUMT00000046863; OTTHUMT00000046864; OTTHUMT00000046865; OTTHUMT00000046866; OTTHUMT00000046868; OTTHUMT00000046869; OTTHUMT00000046870; OTTHUMT00000046871	BEND7	BEN domain containing 7	Multiple_Complex
TC1500007365.hg.1	5,37	6,43	0,09	0,3	F	T	-2,09	9,95E-06	0,0004	F	NM_000236; ENST00000299022; ENST00000356113; ENST00000414170; ENST00000433326; ENST00000559845; ENST00000560257; ENST00000560664; BC132825; BC136495; BC146659; OTTHUMT00000255879; OTTHUMT00000416209; OTTHUMT00000416210; OTTHUMT00000416211; OTTHUMT00000416212; OTTHUMT00000416213; OTTHUMT00000416214	LIPC	lipase, hepatic	Multiple_Complex
TC0200008071.hg.1	12,16	12,91	0,08	0,03	T	T	-1,69	1,00E-05	0,0004	T	NM_006636; NR_027405; ENST00000394053; ENST00000409601; ENST00000409804; ENST00000462026; ENST00000470592; ENST00000477455; ENST00000488086; ENST00000489041; BC001548; BC015062; BC017054; OTTHUMT00000252045; OTTHUMT00000329302; OTTHUMT00000329303; OTTHUMT00000329304; OTTHUMT00000329305; OTTHUMT00000351281; OTTHUMT00000351282; OTTHUMT00000467420	MTHFD2	methylenetetrahydrofolate dehydrogenase (NADP+ dependent) 2, methenyltetrahydrofolate cyclohydrolase	Multiple_Complex
TC0200015771.hg.1	12,31	11,27	0,1	0,2	T	T	2,06	1,00E-05	0,0004	T	NM_001278552; NM_006000; ENST00000248437; ENST00000392088; ENST00000398989; ENST00000425551; ENST00000427737; ENST00000447205; ENST00000456818; ENST00000462806; ENST00000475683; ENST00000498660; BC009238; OTTHUMT00000256816; OTTHUMT00000259055; OTTHUMT00000259056; OTTHUMT00000259057; OTTHUMT00000259058; OTTHUMT00000259059; OTTHUMT00000259060; OTTHUMT00000335641; OTTHUMT00000335642; OTTHUMT0000033…	TUBA4A	tubulin, alpha 4a	Multiple_Complex
TC1100013129.hg.1	14,33	13,49	0,02	0,01	T	T	1,79	1,00E-05	0,0004	T	NM_001909; ENST00000236671; ENST00000367196; ENST00000429746; ENST00000433655; ENST00000438213; ENST00000497544; BC016320; OTTHUMT00000104272; OTTHUMT00000105334; OTTHUMT00000105335; OTTHUMT00000105336; OTTHUMT00000105337; OTTHUMT00000142060; uc001luc.2	CTSD	cathepsin D	Multiple_Complex
TC1800008331.hg.1	13,76	12,98	0,02	0,07	T	T	1,72	1,00E-05	0,0004	T	NM_001007559; NM_001308201; NM_005637; ENST00000269137; ENST00000269138; ENST00000415083; ENST00000539244; ENST00000542420; ENST00000577572; ENST00000577636; ENST00000577751; ENST00000578595; ENST00000578700; ENST00000578954; ENST00000579061; ENST00000579640; ENST00000580003; ENST00000580642; ENST00000580751; ENST00000580958; ENST00000581021; ENST00000581570; ENST00000582092; ENST00000582448; ENS…	SS18	synovial sarcoma translocation, chromosome 18	Multiple_Complex
TC0400011949.hg.1	6,78	8,14	0,37	0,11	T	T	-2,58	1,01E-05	0,0004	T	NM_018717; ENST00000398940; ENST00000502696; ENST00000509479; BC137130; BC137131; OTTHUMT00000364934; OTTHUMT00000364935	MAML3	mastermind-like transcriptional coactivator 3	Multiple_Complex
TC0200008797.hg.1	8,67	7,32	0,09	0,36	T	T	2,55	1,02E-05	0,0004	T	NM_001056; NM_176825; ENST00000251481; ENST00000326853; ENST00000409067; ENST00000409880; ENST00000437390; ENST00000438339; ENST00000442801; ENST00000492554; ENST00000495441; BC005353; OTTHUMT00000253559; OTTHUMT00000253560; OTTHUMT00000329965; OTTHUMT00000329966; OTTHUMT00000329967; OTTHUMT00000329968; OTTHUMT00000329969; OTTHUMT00000330147; OTTHUMT00000330148; uc002tdx.3; uc002tdy.3	SULT1C2	sulfotransferase family 1C member 2	Multiple_Complex
TC0600014336.hg.1	5,97	4,27	0,37	0,17	T	F	3,24	1,03E-05	0,0004	F	NM_002944; ENST00000368507; ENST00000368508; ENST00000403284; OTTHUMT00000043464; OTTHUMT00000043465; OTTHUMT00000043466	ROS1	ROS proto-oncogene 1 , receptor tyrosine kinase	Multiple_Complex
TC1600008580.hg.1	8,82	9,68	0,16	0,1	T	T	-1,82	1,02E-05	0,0004	T	NM_022041; NR_039871; ENST00000567335; ENST00000568107; ENST00000581455; BC044840; OTTHUMT00000269050; OTTHUMT00000432301; uc021tls.1	GAN; MIR4720	gigaxonin; microRNA 4720	Multiple_Complex
TC1700007790.hg.1	12,15	13,01	0,06	0,07	T	T	-1,81	1,02E-05	0,0004	T	NM_001254; ENST00000209728; ENST00000473555; ENST00000577249; ENST00000580824; ENST00000582402; BC025232; OTTHUMT00000257129; OTTHUMT00000257130; OTTHUMT00000447439; OTTHUMT00000447440; OTTHUMT00000447441	CDC6	cell division cycle 6	Multiple_Complex
TC1800006889.hg.1	10,93	11,83	0,07	0,14	T	T	-1,86	1,03E-05	0,0004	T	NM_003831; ENST00000339486; ENST00000577250; ENST00000577501; ENST00000581220; ENST00000581302; ENST00000581339; ENST00000581585; ENST00000584052; ENST00000584130; ENST00000584960; ENST00000584992; BC028360; BC039729; OTTHUMT00000254756; OTTHUMT00000445290; OTTHUMT00000445291; OTTHUMT00000445292; OTTHUMT00000445293; OTTHUMT00000445294; OTTHUMT00000445295; OTTHUMT00000445296; OTTHUMT00000445297; O…	RIOK3	RIO kinase 3	Multiple_Complex
TC0600014238.hg.1	9,31	10,28	0,11	0,05	T	T	-1,96	1,04E-05	0,0004	T	NM_001199322; NM_001199323; NM_201280; ENST00000244777; ENST00000397457; ENST00000475998; ENST00000486432; ENST00000543936; ENST00000627748; BC119644; BC119645; OTTHUMT00000039797; OTTHUMT00000348954; OTTHUMT00000348955; OTTHUMT00000348956; OTTHUMT00000483255; uc003mxy.3	BLOC1S5	biogenesis of lysosomal organelles complex-1, subunit 5, muted	Multiple_Complex
TC1500010162.hg.1	7,41	6,46	0,09	0,26	T	T	1,94	1,04E-05	0,0004	T	NM_001145648; NM_002891; NM_153815; ENST00000394745; ENST00000419573; ENST00000558480; ENST00000559926; ENST00000560286; ENST00000560334; ENST00000560943; ENST00000561112; ENST00000623620; BC040275; OTTHUMT00000291371; OTTHUMT00000418828; OTTHUMT00000418829; OTTHUMT00000418830; OTTHUMT00000418831; OTTHUMT00000418832; OTTHUMT00000418833; OTTHUMT00000418834; OTTHUMT00000418835	RASGRF1	Ras protein-specific guanine nucleotide-releasing factor 1	Multiple_Complex
TC0800009157.hg.1	5,46	6,62	0,26	0,15	T	T	-2,22	1,07E-05	0,0004	T	NM_001160354; NM_001160355; NM_017527; ENST00000292430; ENST00000518841; ENST00000519387; ENST00000519390; ENST00000522591; BC117142; BC117144; OTTHUMT00000379893; OTTHUMT00000379894; OTTHUMT00000379956; OTTHUMT00000379957; OTTHUMT00000379958	LY6K	lymphocyte antigen 6 complex, locus K	Multiple_Complex
TC0X00006799.hg.1	14,07	13,27	0,04	0,06	T	T	1,74	1,07E-05	0,0004	T	NM_002970; NR_027783; ENST00000379251; ENST00000379253; ENST00000379254; ENST00000379270; ENST00000462639; ENST00000463236; ENST00000474223; ENST00000487713; ENST00000489394; BC002503; BC008424; OTTHUMT00000056056; OTTHUMT00000056057; OTTHUMT00000056058; OTTHUMT00000056059; OTTHUMT00000056060; OTTHUMT00000056061; OTTHUMT00000056062; OTTHUMT00000056063; OTTHUMT00000056064	SAT1	spermidine/spermine N1-acetyltransferase 1	Multiple_Complex
TC0400010745.hg.1	10,79	11,55	0,1	0,07	T	T	-1,69	1,09E-05	0,0004	T	NM_001267843; NM_004898; ENST00000309964; ENST00000381322; ENST00000435527; ENST00000479384; ENST00000506747; ENST00000506923; ENST00000508049; ENST00000509151; ENST00000511124; ENST00000513033; ENST00000513440; BC041878; BC126157; BC126159; OTTHUMT00000219982; OTTHUMT00000317146; OTTHUMT00000317147; OTTHUMT00000361993; OTTHUMT00000361994; OTTHUMT00000361995; OTTHUMT00000361996; OTTHUMT0000036199…	CLOCK	clock circadian regulator	Multiple_Complex
TC0600009884.hg.1	7,07	5,69	0,23	0,21	T	F	2,61	1,09E-05	0,0004	F	NM_025107; ENST00000367245; ENST00000529453; ENST00000532295; BC128463; BC128464; OTTHUMT00000042750; OTTHUMT00000394880; OTTHUMT00000394882	MYCT1	myc target 1	Coding
TC0100009364.hg.1	14,58	13,63	0,1	0,16	T	T	1,94	1,09E-05	0,0004	T	NM_000757; NM_172210; NM_172211; NM_172212; ENST00000329608; ENST00000357302; ENST00000369801; ENST00000369802; ENST00000420111; ENST00000488198; ENST00000525659; ENST00000526001; ENST00000527192; BC021117; OTTHUMT00000032208; OTTHUMT00000032209; OTTHUMT00000032210; OTTHUMT00000032211; OTTHUMT00000032212; OTTHUMT00000390376; OTTHUMT00000390377; OTTHUMT00000390378; OTTHUMT00000390379	CSF1	colony stimulating factor 1 (macrophage)	Multiple_Complex
TC0200010615.hg.1	11,13	11,89	0,12	0,03	T	T	-1,7	1,10E-05	0,0004	T	NM_001142300; NM_152523; NR_039934; ENST00000295414; ENST00000339882; ENST00000392209; ENST00000420321; ENST00000420822; ENST00000452312; ENST00000468768; ENST00000581168; BC067253; OTTHUMT00000256478; OTTHUMT00000337061; OTTHUMT00000337062; OTTHUMT00000337063; OTTHUMT00000337064; OTTHUMT00000337065; OTTHUMT00000337066; uc021vvq.1	CCNYL1; MIR4775	cyclin Y like 1; microRNA 4775	Multiple_Complex
TC1000008891.hg.1	8,38	9,6	0,37	0,08	T	T	-2,33	1,11E-05	0,0004	T	NM_004419; ENST00000369583; ENST00000468749; BC062545; OTTHUMT00000050333; OTTHUMT00000050335	DUSP5	dual specificity phosphatase 5	Multiple_Complex
TC0100008845.hg.1	10,47	9,34	0,2	0,23	T	T	2,19	1,11E-05	0,0004	T	NM_001297704; NM_001297705; NM_001297706; NM_012302; ENST00000319517; ENST00000359929; ENST00000370713; ENST00000370715; ENST00000370717; ENST00000370721; ENST00000370723; ENST00000370725; ENST00000370727; ENST00000370728; ENST00000370730; ENST00000402328; ENST00000449420; ENST00000464551; ENST00000464775; ENST00000468283; ENST00000469377; ENST00000472424; ENST00000473719; ENST00000492666; ENST00…	ADGRL2	adhesion G protein-coupled receptor L2	Multiple_Complex
TC1000010827.hg.1	8,93	7,91	0,16	0,1	T	T	2,03	1,11E-05	0,0004	T	NM_021800; NM_201262; ENST00000225171; ENST00000339758; ENST00000480180; ENST00000480963; ENST00000483798; BC017018; OTTHUMT00000048291; OTTHUMT00000048292; OTTHUMT00000048293; OTTHUMT00000048294; OTTHUMT00000048295	DNAJC12	DnaJ (Hsp40) homolog, subfamily C, member 12	Multiple_Complex
TC1700007796.hg.1	8,43	9,43	0,25	0,03	T	T	-2	1,11E-05	0,0004	T	NM_001552; ENST00000269593; BC016041; OTTHUMT00000257134	IGFBP4	insulin like growth factor binding protein 4	Multiple_Complex
TC0200009109.hg.1	8,33	9,36	0,12	0,2	T	T	-2,04	1,12E-05	0,0004	T	hsa_circ_0007849	GLI2	Jeck2013 ALT_ACCEPTOR, ALT_DONOR, coding, INTERNAL, intronic best transcript NM_005270	NonCoding
TC1700007498.hg.1	12,33	13,14	0,08	0,11	T	T	-1,74	1,12E-05	0,0004	T	NM_015355; ENST00000322652; ENST00000494429; ENST00000578106; ENST00000580398; BC015704; OTTHUMT00000256260; OTTHUMT00000445742; OTTHUMT00000445743; OTTHUMT00000445744	SUZ12	SUZ12 polycomb repressive complex 2 subunit	Multiple_Complex
TC0100011129.hg.1	12,21	12,99	0,07	0,09	T	T	-1,72	1,13E-05	0,0004	T	NM_001276464; NM_003822; NM_205860; ENST00000236914; ENST00000367357; ENST00000367362; ENST00000447034; ENST00000474307; ENST00000544748; BC118571; BC118652; OTTHUMT00000086497; OTTHUMT00000086498; OTTHUMT00000086499; OTTHUMT00000086500; OTTHUMT00000086501	NR5A2	nuclear receptor subfamily 5, group A, member 2	Multiple_Complex
TC0500009378.hg.1	7,25	8,38	0,16	0,21	T	T	-2,18	1,13E-05	0,0004	T	NM_004946; ENST00000256935; ENST00000433448; ENST00000518056; ENST00000519223; ENST00000519628; ENST00000519734; ENST00000519868; ENST00000520181; ENST00000520450; ENST00000520836; ENST00000520908; ENST00000522138; ENST00000522994; ENST00000523351; ENST00000523684; ENST00000524185; ENST00000540750; BC104900; BC113457; OTTHUMT00000252828; OTTHUMT00000371641; OTTHUMT00000371643; OTTHUMT00000371644;…	DOCK2	dedicator of cytokinesis 2	Multiple_Complex
TC0100016018.hg.1	5,59	7,1	0,16	0,18	T	T	-2,85	1,14E-05	0,0004	T	NM_001199723; NM_001878; ENST00000368220; ENST00000368221; ENST00000368222; ENST00000621784; BC001109; OTTHUMT00000098966; OTTHUMT00000098967; OTTHUMT00000098968	CRABP2	cellular retinoic acid binding protein 2	Coding
TC0200012863.hg.1	9,91	10,68	0,1	0,05	T	T	-1,7	1,16E-05	0,0004	T	NM_001128210; NM_181784; ENST00000356388; ENST00000421087; ENST00000426832; ENST00000427238; ENST00000440972; ENST00000443619; ENST00000452315; ENST00000474228; BC130292; BC136334; OTTHUMT00000327632; OTTHUMT00000327633; OTTHUMT00000327634; OTTHUMT00000327635; OTTHUMT00000327636; OTTHUMT00000327637; OTTHUMT00000327686; OTTHUMT00000376661	SPRED2	sprouty-related, EVH1 domain containing 2	Multiple_Complex
TC0300008945.hg.1	6,31	4,66	0,29	0,22	T	F	3,14	1,16E-05	0,0004	F	NM_001085049; NM_001252090; NM_001252091; NM_001252092; NM_001252093; NM_012219; ENST00000289104; ENST00000423968; ENST00000461114; ENST00000464896; ENST00000474559; ENST00000475711; ENST00000477784; ENST00000478647; ENST00000494949; ENST00000614350; ENST00000621127; OTTHUMT00000357990; OTTHUMT00000357991; OTTHUMT00000357992; OTTHUMT00000357993; OTTHUMT00000357994; OTTHUMT00000357995; OTTHUMT0000…	MRAS	muscle RAS oncogene homolog	Multiple_Complex
TC0900006708.hg.1	10,68	11,59	0,14	0,05	T	T	-1,88	1,16E-05	0,0004	T	NM_001039697; ENST00000380799; ENST00000380821; ENST00000421710; ENST00000461041; ENST00000467062; ENST00000490969; ENST00000610884; BC108743; BC121011; BC121012; OTTHUMT00000051762; OTTHUMT00000051763; OTTHUMT00000051764; OTTHUMT00000051765; OTTHUMT00000051766; OTTHUMT00000051767	SNAPC3	small nuclear RNA activating complex polypeptide 3	Multiple_Complex
TC1000011892.hg.1	10,59	11,34	0,04	0,03	T	T	-1,68	1,16E-05	0,0004	T	NM_018017; NR_031747; ENST00000369285; ENST00000369286; ENST00000369287; ENST00000428953; ENST00000459421; ENST00000490661; ENST00000497592; BC103499; BC105632; BC152306; OTTHUMT00000050450; OTTHUMT00000050451; OTTHUMT00000050452; OTTHUMT00000050453; OTTHUMT00000050454; OTTHUMT00000050455; uc021pyt.1	CCDC186; MIR2110	coiled-coil domain containing 186; microRNA 2110	Multiple_Complex
TC1200008814.hg.1	10,53	9,65	0,01	0,16	T	T	1,84	1,16E-05	0,0004	T	NM_033121; ENST00000261739; ENST00000546476; ENST00000547419; ENST00000547639; ENST00000549826; ENST00000550404; ENST00000551491; ENST00000553025; ENST00000553246; ENST00000553251; BC032833; OTTHUMT00000403427; OTTHUMT00000403428; OTTHUMT00000403430; OTTHUMT00000403431; OTTHUMT00000403432; OTTHUMT00000403433; OTTHUMT00000403434; OTTHUMT00000403435; OTTHUMT00000403436; OTTHUMT00000403437	ANKRD13A	ankyrin repeat domain 13A	Multiple_Complex
TC1600007966.hg.1	13,89	14,71	0,03	0,14	T	T	-1,77	1,16E-05	0,0004	T	NM_005951; ENST00000332374; ENST00000569155; BC008408; BC059780; BC146930; BC146934; OTTHUMT00000257063; OTTHUMT00000433996; uc002ejw.3	MT1H	metallothionein 1H	Multiple_Complex
TC0300010916.hg.1	8,02	6,77	0,15	0,21	T	T	2,39	1,17E-05	0,0004	T	NM_015444; ENST00000503771; BC057390; OTTHUMT00000360190	TMEM158	transmembrane protein 158 (gene/pseudogene)	Coding
TC0700009174.hg.1	12,03	12,83	0,08	0,05	T	T	-1,74	1,17E-05	0,0004	T	NM_001145354; NM_013255; ENST00000352689; ENST00000416992; ENST00000421797; ENST00000429546; ENST00000446815; ENST00000458153; ENST00000468830; ENST00000494286; ENST00000494785; ENST00000496815; ENST00000497746; ENST00000498778; BC067825; OTTHUMT00000337473; OTTHUMT00000337558; OTTHUMT00000337559; OTTHUMT00000337560; OTTHUMT00000337561; OTTHUMT00000337562; OTTHUMT00000337563; OTTHUMT00000337564; …	MKLN1	muskelin 1, intracellular mediator containing kelch motifs	Multiple_Complex
TC1400007774.hg.1	11,33	10,28	0,07	0,2	T	T	2,07	1,17E-05	0,0004	T	NM_001105250; NM_001272020; NM_004796; NM_138970; NR_073546; NR_073547; ENST00000281127; ENST00000335750; ENST00000428277; ENST00000553363; ENST00000553631; ENST00000553803; ENST00000554719; ENST00000554738; ENST00000555073; ENST00000555387; ENST00000556003; ENST00000556088; ENST00000556496; ENST00000557081; ENST00000557594; BC152457; OTTHUMT00000413783; OTTHUMT00000413784; OTTHUMT00000413785; OT…	NRXN3	neurexin 3	Multiple_Complex
TC0700011518.hg.1	10,49	9,68	0,12	0,11	T	T	1,75	1,18E-05	0,0004	T	NM_001281447; NM_173537; ENST00000451013; ENST00000478628; ENST00000484624; ENST00000610955; ENST00000614386; ENST00000619775; ENST00000625377; BC067859; OTTHUMT00000456474; OTTHUMT00000456476; OTTHUMT00000456478; OTTHUMT00000456479; OTTHUMT00000463749; OTTHUMT00000463750	GTF2IRD2; GTF2IRD2B	GTF2I repeat domain containing 2; GTF2I repeat domain containing 2B	Multiple_Complex
TC0900011151.hg.1	11,55	12,45	0,07	0,15	T	T	-1,87	1,18E-05	0,0004	T	NM_032012; ENST00000374586; ENST00000413712; ENST00000472207; ENST00000482868; ENST00000491854; OTTHUMT00000053587; OTTHUMT00000053588; OTTHUMT00000053589; OTTHUMT00000053590; OTTHUMT00000356304	TMEM245	transmembrane protein 245	Multiple_Complex
TC0X00008760.hg.1	5,44	6,65	0,16	0,2	T	T	-2,33	1,18E-05	0,0004	T	NM_001178106; NM_001178107; NM_001178108; NM_001178109; NM_001178110; NM_001178113; NM_001178115; NM_007150; ENST00000318504; ENST00000318529; ENST00000324823; ENST00000370268; ENST00000370270; ENST00000426821; ENST00000436731; ENST00000447792; ENST00000449285; ENST00000454925; ENST00000535861; ENST00000539731; OTTHUMT00000060933; OTTHUMT00000060934; OTTHUMT00000060935; OTTHUMT00000377480; OTTHUM…	ZNF185	zinc finger protein 185 (LIM domain)	Multiple_Complex
TC0X00010642.hg.1	8,24	9,55	0,29	0,23	T	T	-2,47	1,20E-05	0,0004	T	NM_001173487; NM_001173488; NM_017544; ENST00000304449; ENST00000371527; ENST00000487600; ENST00000542113; ENST00000617452; BC040379; BC047878; BC068514; OTTHUMT00000058044; OTTHUMT00000058045; OTTHUMT00000058046; uc004erq.3	NKRF	NFKB repressing factor	Multiple_Complex
TC0200014703.hg.1	7,06	8,57	0,21	0,23	T	T	-2,85	1,22E-05	0,0005	T	NM_001301684; NM_001301685; NM_138803; ENST00000283233; ENST00000409187; ENST00000409889; ENST00000417066; ENST00000448656; ENST00000451554; ENST00000454257; ENST00000491563; BC107596; BC107597; OTTHUMT00000333270; OTTHUMT00000333271; OTTHUMT00000333272; OTTHUMT00000333273; OTTHUMT00000333274; OTTHUMT00000333275; OTTHUMT00000333276; OTTHUMT00000333277	CCDC148	coiled-coil domain containing 148	Multiple_Complex
TC1000007776.hg.1	8,33	7,37	0,06	0,16	T	T	1,95	1,23E-05	0,0005	T	NM_014951; NM_199450; NM_199451; NM_199452; ENST00000344640; ENST00000373784; ENST00000395249; ENST00000395251; ENST00000395254; ENST00000395255; ENST00000410046; ENST00000421210; ENST00000461412; ENST00000466727; ENST00000614806; OTTHUMT00000048238; OTTHUMT00000048239; OTTHUMT00000048240; OTTHUMT00000048241; OTTHUMT00000277036; OTTHUMT00000277037; OTTHUMT00000277038; OTTHUMT00000340545; OTTHUMT0…	ZNF365	zinc finger protein 365	Multiple_Complex
TC0100017083.hg.1	8,08	6,98	0,18	0,23	T	T	2,15	1,24E-05	0,0005	T	NM_001164522; NM_001304839; NM_177403; ENST00000617070; ENST00000617991; ENST00000622969; ENST00000623597; ENST00000623893; BC017092; OTTHUMT00000479162; OTTHUMT00000479163; OTTHUMT00000479164; OTTHUMT00000479165	RAB7B	RAB7B, member RAS oncogene family	Coding
TC1000009104.hg.1	8,06	6,8	0,22	0,2	T	T	2,4	1,24E-05	0,0005	T	NM_001030059; ENST00000369073; ENST00000398250; ENST00000427079; ENST00000496437; BC101268; BC132787; OTTHUMT00000050701; OTTHUMT00000050702; OTTHUMT00000050703	PLPP4	phospholipid phosphatase 4	Multiple_Complex
TC0200016578.hg.1	11,99	12,87	0,1	0,14	T	T	-1,84	1,28E-05	0,0005	T	NM_001287584; NM_001287585; NM_138285; NR_109856; ENST00000295119; ENST00000374930; ENST00000409798; ENST00000442895; ENST00000446612; ENST00000452137; ENST00000455063; ENST00000472844; ENST00000479162; ENST00000497330; BC047029; BC061698; OTTHUMT00000255865; OTTHUMT00000334518; OTTHUMT00000334519; OTTHUMT00000334520; OTTHUMT00000334585; OTTHUMT00000334586; OTTHUMT00000334587; OTTHUMT00000334588;…	NUP35	nucleoporin 35kDa	Multiple_Complex
TC0100011027.hg.1	11,46	12,4	0,19	0,05	T	T	-1,91	1,30E-05	0,0005	T	NM_024529; ENST00000367435; ENST00000477868; ENST00000482484; BC065037; OTTHUMT00000086696; OTTHUMT00000086697; OTTHUMT00000086698	CDC73	cell division cycle 73	Multiple_Complex
TC0300009524.hg.1	13,43	14,46	0,08	0,16	T	T	-2,03	1,31E-05	0,0005	T	NM_001258315; NM_001258316; NM_018098; ENST00000232458; ENST00000366090; ENST00000366254; ENST00000392692; ENST00000415665; ENST00000417960; ENST00000426894; ENST00000428567; ENST00000437296; ENST00000438041; ENST00000441497; ENST00000444250; ENST00000460860; ENST00000486027; ENST00000487073; ENST00000540509; BC112086; OTTHUMT00000345629; OTTHUMT00000345993; OTTHUMT00000345994; OTTHUMT00000345995…	ECT2	epithelial cell transforming 2	Multiple_Complex
TC1800009290.hg.1	7,2	8,16	0,12	0,08	T	T	-1,95	1,31E-05	0,0005	T	NM_001080467; ENST00000285039; ENST00000324581; ENST00000585859; ENST00000586036; ENST00000587895; ENST00000589568; ENST00000592688; ENST00000616031; OTTHUMT00000448515; OTTHUMT00000448517; OTTHUMT00000448519; OTTHUMT00000448520; OTTHUMT00000448521; OTTHUMT00000448522; OTTHUMT00000448564	MYO5B	myosin VB	Multiple_Complex
TC0500010553.hg.1	10,08	8,6	0,03	0,38	T	T	2,78	1,31E-05	0,0005	T	NM_001243093; NM_001465; NM_199335; ENST00000351578; ENST00000503065; ENST00000504542; ENST00000505428; ENST00000506557; ENST00000509072; ENST00000510188; ENST00000512138; ENST00000512982; ENST00000515010; BC117449; BC143645; OTTHUMT00000367098; OTTHUMT00000367099; OTTHUMT00000367100; OTTHUMT00000367101; OTTHUMT00000367102; OTTHUMT00000367103; OTTHUMT00000367104; OTTHUMT00000367824; OTTHUMT000003…	FYB	FYN binding protein	Multiple_Complex
TC1700010199.hg.1	9,19	10,41	0,22	0,16	T	T	-2,32	1,32E-05	0,0005	T	NM_033198; ENST00000268758; ENST00000308360; ENST00000395346; ENST00000465444; ENST00000484580; ENST00000487231; ENST00000492429; ENST00000577594; ENST00000577620; ENST00000580968; ENST00000582615; ENST00000582721; ENST00000583631; ENST00000584080; ENST00000584413; BC069228; OTTHUMT00000255833; OTTHUMT00000255834; OTTHUMT00000255835; OTTHUMT00000255836; OTTHUMT00000255837; OTTHUMT00000255838; OTT…	PIGS	phosphatidylinositol glycan anchor biosynthesis class S	Multiple_Complex
TC1000010870.hg.1	7,58	8,82	0,08	0,3	T	T	-2,36	1,32E-05	0,0005	T	hsa_circ_0000242	SRGN	Memczak2013 ANTISENSE, coding, INTERNAL, UTR3 best transcript NM_002727	NonCoding
TC1000010727.hg.1	7,73	8,62	0,08	0,05	T	T	-1,84	1,33E-05	0,0005	T	NM_001149; NM_001204403; NM_001204404; NM_020987; ENST00000280772; ENST00000355288; ENST00000373815; ENST00000373820; ENST00000373827; ENST00000459732; ENST00000460468; ENST00000465749; ENST00000467420; ENST00000469721; ENST00000474360; ENST00000480699; ENST00000486349; ENST00000489505; ENST00000502769; ENST00000503366; ENST00000503925; ENST00000506635; ENST00000508449; ENST00000510382; ENST00000…	ANK3	ankyrin 3, node of Ranvier (ankyrin G)	Multiple_Complex
TC0100008621.hg.1	10,39	11,43	0,02	0,1	T	T	-2,05	1,33E-05	0,0005	T	NM_001003679; NM_001003680; NM_001198681; NM_001198683; NM_001198687; NM_001198688; NM_001198689; NM_002303; NM_017526; ENST00000344610; ENST00000349533; ENST00000371058; ENST00000371059; ENST00000371060; ENST00000371065; ENST00000406510; ENST00000462765; ENST00000471762; ENST00000475108; ENST00000484243; ENST00000488747; ENST00000497874; ENST00000613538; ENST00000616738; BC056250; OTTHUMT0000002…	LEPR; LEPROT	leptin receptor; leptin receptor overlapping transcript	Multiple_Complex
TC0200008803.hg.1	10,54	11,72	0,17	0,26	T	T	-2,27	1,34E-05	0,0005	T	NM_181453; NR_028063; ENST00000309863; ENST00000393321; ENST00000409821; ENST00000409896; ENST00000447558; ENST00000462897; ENST00000467566; ENST00000478207; ENST00000480863; ENST00000481729; ENST00000482325; ENST00000485546; ENST00000492785; ENST00000614209; BC146789; OTTHUMT00000330141; OTTHUMT00000330143; OTTHUMT00000330229; OTTHUMT00000330230; OTTHUMT00000330231; OTTHUMT00000330232; OTTHUMT00…	GCC2	GRIP and coiled-coil domain containing 2	Multiple_Complex
TC0900009861.hg.1	8,74	10,02	0,16	0,19	T	T	-2,43	1,34E-05	0,0005	T	NM_022917; NM_139235; ENST00000297990; ENST00000353159; ENST00000379470; ENST00000379471; ENST00000464829; ENST00000496319; BC030139; OTTHUMT00000001015; OTTHUMT00000001016; OTTHUMT00000001017; OTTHUMT00000001018; OTTHUMT00000001019; OTTHUMT00000001020	NOL6	nucleolar protein 6 (RNA-associated)	Multiple_Complex
TC1100007273.hg.1	14,08	13,31	0,09	0,04	T	T	1,71	1,36E-05	0,0005	T	NM_000610; NM_001001389; NM_001001390; NM_001001391; NM_001001392; NM_001202555; NM_001202556; NM_001202557; ENST00000263398; ENST00000278385; ENST00000278386; ENST00000279452; ENST00000352818; ENST00000415148; ENST00000425428; ENST00000428726; ENST00000433892; ENST00000434472; ENST00000442151; ENST00000524922; ENST00000525209; ENST00000525211; ENST00000525241; ENST00000525293; ENST00000525348; E…	CD44	CD44 molecule (Indian blood group)	Multiple_Complex
TC1900010743.hg.1	12,37	11,44	0,2	0,18	T	T	1,9	1,36E-05	0,0005	T	NM_000660; ENST00000221930; ENST00000597453; ENST00000598758; ENST00000600196; BC000125; BC001180; BC022242; OTTHUMT00000463500; OTTHUMT00000463501; OTTHUMT00000463504; OTTHUMT00000463507	TGFB1	transforming growth factor beta 1	Multiple_Complex
TC1400010620.hg.1	12,86	13,61	0,08	0,03	T	T	-1,69	1,36E-05	0,0005	T	NM_003082; ENST00000216294; BC014984; BC019038; OTTHUMT00000276976; uc001xft.3	SNAPC1	small nuclear RNA activating complex polypeptide 1	Multiple_Complex
TC0600014223.hg.1	9,25	7,83	0,34	0,14	T	T	2,67	1,38E-05	0,0005	T	NM_001286455; NM_001286456; NM_015482; NM_021945; NR_104448; ENST00000380298; ENST00000380302; ENST00000406686; ENST00000433689; ENST00000436008; ENST00000467144; ENST00000467177; ENST00000482874; ENST00000485307; ENST00000490273; ENST00000496753; ENST00000497691; BC128580; OTTHUMT00000039682; OTTHUMT00000039683; OTTHUMT00000039685; OTTHUMT00000039686; OTTHUMT00000353059; OTTHUMT00000353083; OTTH…	SLC22A23	solute carrier family 22, member 23	Multiple_Complex
TC0800010460.hg.1	11,78	12,68	0,17	0,07	T	T	-1,87	1,39E-05	0,0005	T	NM_001279356; NM_001279357; NM_001279358; NM_001279359; NM_001279360; NM_006330; ENST00000316963; ENST00000343231; ENST00000517297; ENST00000518546; ENST00000519272; ENST00000519891; ENST00000519926; ENST00000520718; ENST00000520896; ENST00000521352; ENST00000521856; ENST00000521898; ENST00000522007; ENST00000618741; ENST00000618914; BC008652; BC010397; OTTHUMT00000378238; OTTHUMT00000378240; OTT…	LYPLA1	lysophospholipase I	Multiple_Complex
TC0700010558.hg.1	6,19	4,96	0,16	0,33	T	F	2,35	1,40E-05	0,0005	F	NM_006735; ENST00000222718; ENST00000612779; BC130571; BC136500; OTTHUMT00000358508; OTTHUMT00000475630	HOXA2	homeobox A2	Multiple_Complex
TC0200015670.hg.1	9,97	10,82	0,24	0,11	T	T	-1,81	1,42E-05	0,0005	T	NM_020814; ENST00000273067; BC098448; OTTHUMT00000337272	MARCH4	membrane associated ring finger 4	Multiple_Complex
TC0100015803.hg.1	9,61	10,56	0,13	0,1	T	T	-1,94	1,43E-05	0,0005	T	NM_001083963; NM_001083964; NM_001083965; NM_006862; ENST00000368822; ENST00000368823; ENST00000368824; ENST00000368825; ENST00000368827; ENST00000440583; ENST00000458431; ENST00000463553; ENST00000484421; ENST00000486986; ENST00000494725; ENST00000525790; ENST00000526378; ENST00000526413; ENST00000530202; OTTHUMT00000036644; OTTHUMT00000036645; OTTHUMT00000036646; OTTHUMT00000036647; OTTHUMT0000…	TDRKH	tudor and KH domain containing	Multiple_Complex
TC1000009863.hg.1	10,05	10,89	0,05	0,12	T	T	-1,8	1,43E-05	0,0005	T	NM_001282695; NM_001282696; NM_001282697; NM_001282698; NM_001282699; NM_001282700; NM_001282701; NM_001282702; NM_001282703; NM_031453; ENST00000181796; ENST00000378458; ENST00000378462; ENST00000378465; ENST00000378467; ENST00000378470; ENST00000442012; ENST00000452706; ENST00000464952; ENST00000468492; ENST00000468747; ENST00000471815; ENST00000472095; ENST00000474143; ENST00000475786; ENST000…	FAM107B	family with sequence similarity 107, member B	Multiple_Complex
TC0500007804.hg.1	13,87	13,06	0,11	0,1	T	T	1,74	1,44E-05	0,0005	T	NM_000859; NM_001130996; ENST00000287936; ENST00000343975; ENST00000442032; ENST00000504466; ENST00000507942; ENST00000508070; ENST00000509085; ENST00000509431; ENST00000511206; ENST00000511986; ENST00000512053; ENST00000514315; ENST00000515776; BC033692; OTTHUMT00000219877; OTTHUMT00000369019; OTTHUMT00000369021; OTTHUMT00000369022; OTTHUMT00000369023; OTTHUMT00000369024; OTTHUMT00000369025; OTT…	HMGCR	3-hydroxy-3-methylglutaryl-CoA reductase	Multiple_Complex
TC0100015918.hg.1	11,32	12,11	0,13	0,04	T	T	-1,73	1,44E-05	0,0005	T	NM_017582; ENST00000292211; ENST00000467683; ENST00000474181; ENST00000476612; ENST00000483639; ENST00000491572; ENST00000497453; OTTHUMT00000090704; OTTHUMT00000090705; OTTHUMT00000090706; OTTHUMT00000090707; OTTHUMT00000090708; OTTHUMT00000090709; OTTHUMT00000099004	UBE2Q1	ubiquitin-conjugating enzyme E2Q family member 1	Multiple_Complex
TC1600008585.hg.1	10,9	11,92	0,36	0,09	T	T	-2,03	1,44E-05	0,0005	T	NM_030629; NM_198390; ENST00000398040; ENST00000537098; ENST00000539778; ENST00000561605; ENST00000564666; ENST00000565029; ENST00000565680; ENST00000566462; ENST00000566513; ENST00000569146; ENST00000621537; ENST00000623842; BC038113; OTTHUMT00000432399; OTTHUMT00000432400; OTTHUMT00000432401; OTTHUMT00000432402; OTTHUMT00000432404; OTTHUMT00000432405; OTTHUMT00000432407; OTTHUMT00000432408; OTT…	CMIP	c-Maf inducing protein	Multiple_Complex
TC0600012299.hg.1	8,83	7,87	0,18	0,12	T	T	1,94	1,45E-05	0,0005	T	NM_012434; ENST00000355773; ENST00000481996; BC020961; OTTHUMT00000041228; OTTHUMT00000041229	SLC17A5	solute carrier family 17 (acidic sugar transporter), member 5	Multiple_Complex
TC0300014031.hg.1	11,69	10,87	0,01	0,12	T	T	1,76	1,46E-05	0,0005	T	NM_199511; NM_199512; NR_109779; ENST00000206423; ENST00000439685; ENST00000461431; ENST00000479368; ENST00000480275; BC110842; BC116178; OTTHUMT00000354219; OTTHUMT00000354221; OTTHUMT00000354224; OTTHUMT00000354225; OTTHUMT00000354227	CCDC80; LINC01279	coiled-coil domain containing 80; long intergenic non-protein coding RNA 1279	Multiple_Complex
TC1600008928.hg.1	9,65	8,07	0,43	0,17	T	T	3	1,46E-05	0,0005	T	NM_001039476; NM_001077350; NM_001243247; NM_001243248; NM_001243249; ENST00000399953; ENST00000419636; ENST00000422814; ENST00000456528; ENST00000457916; ENST00000464069; ENST00000468260; ENST00000473674; ENST00000483663; ENST00000610509; ENST00000611875; ENST00000620134; ENST00000621703; ENST00000622194; BC004185; BC012825; OTTHUMT00000134299; OTTHUMT00000134300; OTTHUMT00000134413; OTTHUMT0000…	NPRL3	NPR3-like, GATOR1 complex subunit	Multiple_Complex
TC0400012792.hg.1	7,04	8,75	0,48	0,16	T	T	-3,28	1,47E-05	0,0005	T	NM_207330; ENST00000295461; ENST00000508180; ENST00000511123; ENST00000511852; BC067881; OTTHUMT00000250491; OTTHUMT00000366065; OTTHUMT00000366067; OTTHUMT00000371445	NIPAL1	NIPA-like domain containing 1	Multiple_Complex
TC0500011935.hg.1	8,07	9,65	0,4	0,13	T	T	-2,98	1,47E-05	0,0005	T	NM_178450; ENST00000308660; ENST00000502289; ENST00000504239; ENST00000506088; ENST00000515241; BC047569; BC146948; BC146964; OTTHUMT00000250955; OTTHUMT00000371417; OTTHUMT00000371418; OTTHUMT00000371420; OTTHUMT00000371421	MARCH3	membrane associated ring finger 3	Multiple_Complex
TC1300007870.hg.1	9,31	8,13	0,07	0,16	T	T	2,27	1,48E-05	0,0005	T	NM_001271754; NM_001271755; NM_001271756; NM_004791; ENST00000376162; ENST00000376180; ENST00000474233; ENST00000490242; ENST00000545560; ENST00000618057; ENST00000622834; BC036788; OTTHUMT00000045668; OTTHUMT00000045669; OTTHUMT00000471111; OTTHUMT00000471112	ITGBL1	integrin beta like 1	Multiple_Complex
TC0100014848.hg.1	9,8	10,64	0,05	0,06	T	T	-1,79	1,48E-05	0,0005	T	NM_001008661; NM_001008662; NM_001162536; NM_019610; ENST00000260508; ENST00000321792; ENST00000370485; ENST00000370486; ENST00000370491; ENST00000399794; ENST00000413769; ENST00000446900; BC000819; BC012942; OTTHUMT00000029297; OTTHUMT00000029298; OTTHUMT00000029299; OTTHUMT00000029300; OTTHUMT00000029403; OTTHUMT00000029404	CCBL2; RBMXL1	cysteine conjugate-beta lyase 2; RNA binding motif protein, X-linked-like 1	Multiple_Complex
TC0200011898.hg.1	10,65	9,8	0,1	0,12	T	T	1,81	1,49E-05	0,0005	T	NM_001006946; NM_002997; ENST00000254351; ENST00000381150; ENST00000403076; ENST00000429035; ENST00000447124; ENST00000482879; BC008765; OTTHUMT00000207495; OTTHUMT00000323931; OTTHUMT00000323933; OTTHUMT00000323934; OTTHUMT00000474533	SDC1	syndecan 1	Multiple_Complex
TC1000007518.hg.1	11,85	10,57	0,22	0,36	T	T	2,43	1,50E-05	0,0005	T	NM_031912; NM_181519; BC139914; OTTHUMT00000047828; OTTHUMT00000123282; OTTHUMT00000367007; OTTHUMT00000367008; OTTHUMT00000367009; OTTHUMT00000398150	SYT15	synaptotagmin XV	Multiple_Complex
TC0900010565.hg.1	8,8	7,44	0,22	0,23	T	T	2,57	1,52E-05	0,0005	T	NM_152573; ENST00000340717; ENST00000376447; BC023566; OTTHUMT00000052825; OTTHUMT00000052826	RASEF	RAS and EF-hand domain containing	Multiple_Complex
TC0200014414.hg.1	7,39	8,53	0,34	0,16	T	T	-2,2	1,52E-05	0,0005	T	NM_001008540; NM_003467; ENST00000241393; ENST00000409817; ENST00000466288; BC020968; uc002tuy.3	CXCR4	chemokine (C-X-C motif) receptor 4	Multiple_Complex
TC0300014053.hg.1	11,2	12,07	0,15	0,07	T	T	-1,83	1,52E-05	0,0005	T	NM_001256045; ENST00000469284; ENST00000473435; ENST00000481749; ENST00000485060; ENST00000487552; ENST00000493568; ENST00000544716; OTTHUMT00000358022; OTTHUMT00000358023; OTTHUMT00000358024; OTTHUMT00000358027; OTTHUMT00000358028; OTTHUMT00000358030	PIK3CB	phosphatidylinositol-4,5-bisphosphate 3-kinase, catalytic subunit beta	Multiple_Complex
TC0500013239.hg.1	7,58	6,34	0,01	0,23	T	T	2,35	1,54E-05	0,0005	T	NM_018937; ENST00000231130; ENST00000624513; BC104817; OTTHUMT00000251817; OTTHUMT00000478860	PCDHB3	protocadherin beta 3	Coding
TC1600011508.hg.1	9,51	10,29	0,03	0,04	T	T	-1,72	1,54E-05	0,0005	T	NM_001802; BC017503; OTTHUMT00000430081; OTTHUMT00000430083; OTTHUMT00000430084; OTTHUMT00000430085; uc002dkn.3	CDR2	cerebellar degeneration related protein 2	Multiple_Complex
TC0100013872.hg.1	3,7	4,52	0,02	0,24	F	F	-1,76	1,55E-05	0,0005	F	NM_001302269; NM_001956; NR_126098; ENST00000372587; ENST00000460255; ENST00000467046; ENST00000467872; ENST00000490783; BC034393; OTTHUMT00000016983; OTTHUMT00000016984; OTTHUMT00000016985; OTTHUMT00000016986; OTTHUMT00000016987	EDN2	endothelin 2	Multiple_Complex
TC0200013878.hg.1	12,17	13,27	0,15	0,24	T	T	-2,15	1,54E-05	0,0005	T	NM_001278616; NM_001278617; NM_004336; ENST00000302759; ENST00000409311; ENST00000420328; ENST00000436916; ENST00000447014; ENST00000465029; ENST00000466333; ENST00000468927; ENST00000477481; ENST00000478175; ENST00000490632; ENST00000535254; BC028201; OTTHUMT00000331925; OTTHUMT00000331926; OTTHUMT00000331927; OTTHUMT00000331928; OTTHUMT00000331929; OTTHUMT00000331930; OTTHUMT00000331931; OTTHUM…	BUB1	BUB1 mitotic checkpoint serine/threonine kinase	Multiple_Complex
TC0200014834.hg.1	11,59	12,4	0,13	0,08	T	T	-1,75	1,55E-05	0,0005	T	NM_013233; ENST00000355999; ENST00000461000; ENST00000487143; OTTHUMT00000258112; OTTHUMT00000258113; OTTHUMT00000258114	STK39	serine threonine kinase 39	Multiple_Complex
TC0300012208.hg.1	15,6	14,81	0,05	0,15	T	T	1,73	1,56E-05	0,0005	T	NM_198402; ENST00000383657; ENST00000469317; ENST00000471236; ENST00000480081; ENST00000493515; BC049369; BC060839	HACD2	3-hydroxyacyl-CoA dehydratase 2	Multiple_Complex
TC1000009248.hg.1	7,64	6,37	0,22	0,39	T	T	2,41	1,56E-05	0,0005	T	NM_145235; ENST00000368689; ENST00000368691; ENST00000368693; ENST00000368695; ENST00000417114; ENST00000445510; ENST00000456942; ENST00000464130; ENST00000477963; ENST00000492670; ENST00000494896; BC024189; OTTHUMT00000050950; OTTHUMT00000050951; OTTHUMT00000050952; OTTHUMT00000050953; OTTHUMT00000050954; OTTHUMT00000050955; OTTHUMT00000050956; OTTHUMT00000050957; OTTHUMT00000050958; OTTHUMT0000…	FANK1	fibronectin type III and ankyrin repeat domains 1	Multiple_Complex
TC0500009108.hg.1	7,72	9,05	0,14	0,32	T	T	-2,5	1,57E-05	0,0005	T	NM_002084; ENST00000388825; ENST00000517973; ENST00000519214; ENST00000520059; ENST00000520597; ENST00000521632; ENST00000521650; ENST00000521722; ENST00000614343; ENST00000622181; BC013601; BC035841; BC050378; OTTHUMT00000374772; OTTHUMT00000374773; OTTHUMT00000374775; OTTHUMT00000374776; OTTHUMT00000374904; OTTHUMT00000374905; OTTHUMT00000374907; OTTHUMT00000374908	GPX3	glutathione peroxidase 3	Multiple_Complex
TC0200010467.hg.1	5,37	6,32	0,13	0,12	T	T	-1,94	1,58E-05	0,0005	T	NM_001261435; NM_001261436; NM_139158; ENST00000260967; ENST00000410091; ENST00000434439; ENST00000450471; ENST00000451080; ENST00000460149; ENST00000466337; ENST00000488419; ENST00000493754; BC038807; OTTHUMT00000256311; OTTHUMT00000336049; OTTHUMT00000336050; OTTHUMT00000336051; OTTHUMT00000336053; OTTHUMT00000336054; OTTHUMT00000336055; OTTHUMT00000336056; OTTHUMT00000336057	CDK15	cyclin-dependent kinase 15	Multiple_Complex
TC0100011566.hg.1	7,07	5,03	0,44	0,36	T	F	4,13	1,60E-05	0,0005	F	NM_001270616; NM_002763; ENST00000261454; ENST00000366958; ENST00000435016; ENST00000471129; ENST00000498508; ENST00000607425; ENST00000607726; BC024201; OTTHUMT00000089727; OTTHUMT00000089990; OTTHUMT00000357872; OTTHUMT00000470777; OTTHUMT00000470778	PROX1	prospero homeobox 1	Multiple_Complex
TC0300009258.hg.1	10,07	9,04	0,12	0,22	T	T	2,05	1,61E-05	0,0005	T	NM_000902; NM_007287; NM_007288; NM_007289; ENST00000360490; ENST00000382989; ENST00000460393; ENST00000462745; ENST00000462837; ENST00000473730; ENST00000477669; ENST00000481828; ENST00000491026; ENST00000491597; ENST00000492661; ENST00000493237; ENST00000493888; ENST00000495577; ENST00000497890; ENST00000615825; ENST00000616757; ENST00000625667; BC101632; BC101658; BC143465; OTTHUMT00000351076;…	MME	membrane metallo-endopeptidase	Multiple_Complex
TC1500008038.hg.1	9,46	8,48	0,1	0,08	T	T	1,97	1,61E-05	0,0005	T	NM_014862; NR_049837; ENST00000303329; ENST00000525103; ENST00000525505; ENST00000527771; ENST00000529181; ENST00000531595; ENST00000533983; ENST00000558849; ENST00000583188; ENST00000610490; ENST00000622346; BC036099; OTTHUMT00000384387; OTTHUMT00000384389; OTTHUMT00000384390; OTTHUMT00000384436; OTTHUMT00000384437; OTTHUMT00000384438; OTTHUMT00000384440; OTTHUMT00000417520	ARNT2; MIR5572	aryl-hydrocarbon receptor nuclear translocator 2; microRNA 5572	Multiple_Complex
TC1300007491.hg.1	9,06	10,05	0,18	0,14	T	T	-1,99	1,62E-05	0,0006	T	NM_001286818; NM_001730; ENST00000377687; ENST00000464404; ENST00000476859; ENST00000477333; ENST00000539231; BC007695; BC042131; OTTHUMT00000045263; OTTHUMT00000045264; OTTHUMT00000045265; OTTHUMT00000045266	KLF5	Kruppel-like factor 5 (intestinal)	Multiple_Complex
TC1900010009.hg.1	7,47	5,63	0,12	0,21	T	F	3,57	1,62E-05	0,0006	F	NM_001286968; NM_005354; ENST00000252818; ENST00000600972; OTTHUMT00000466318; OTTHUMT00000466319	JUND	jun D proto-oncogene	Coding
TC0300014092.hg.1	7,73	9	0,39	0,15	T	T	-2,41	1,63E-05	0,0006	T	NR_037950	TM4SF19-TCTEX1D2	TM4SF19-TCTEX1D2 readthrough (NMD candidate)	Multiple_Complex
TC0700007132.hg.1	12,86	11,98	0,07	0,14	T	T	1,83	1,65E-05	0,0006	T	NM_001284341; NM_001284343; NM_007270; ENST00000242209; ENST00000418354; ENST00000463443; ENST00000464334; ENST00000468510; ENST00000469202; ENST00000471066; ENST00000472007; ENST00000475220; ENST00000485309; ENST00000489038; ENST00000490776; ENST00000494374; ENST00000538336; BC101723; BC112053; OTTHUMT00000215137; OTTHUMT00000328897; OTTHUMT00000328898; OTTHUMT00000328899; OTTHUMT00000328900; OT…	FKBP9	FK506 binding protein 9	Multiple_Complex
TC1000011596.hg.1	11,31	12,19	0,2	0,06	T	T	-1,84	1,65E-05	0,0006	T	NM_015221; ENST00000324109; ENST00000422692; ENST00000472036; ENST00000543621; BC041628; OTTHUMT00000049832; OTTHUMT00000049833; OTTHUMT00000049834; uc001kqj.2	DNMBP	dynamin binding protein	Multiple_Complex
TC0X00011194.hg.1	14,81	13,98	0,12	0,1	T	T	1,77	1,68E-05	0,0006	T	NM_001110556; NM_001456; ENST00000344736; ENST00000360319; ENST00000369850; ENST00000369856; ENST00000415241; ENST00000420627; ENST00000422373; ENST00000438732; ENST00000444578; ENST00000462590; ENST00000465144; ENST00000466319; ENST00000466325; ENST00000474072; ENST00000474358; ENST00000490936; ENST00000498411; ENST00000498491; ENST00000610817; uc010nuu.1	FLNA	filamin A, alpha	Multiple_Complex
TC2000008439.hg.1	12,68	13,62	0,05	0,17	T	T	-1,91	1,68E-05	0,0006	T	NM_001276380; NM_016649; ENST00000202816; ENST00000617257; OTTHUMT00000078049; uc002woj.3	ESF1	ESF1 nucleolar pre-rRNA processing protein homolog	Multiple_Complex
TC1200007182.hg.1	11,2	10,24	0,08	0,09	T	T	1,95	1,68E-05	0,0006	T	NM_001271783; NM_001271784; NM_018099; ENST00000182377; ENST00000536681; ENST00000547116; ENST00000547411; ENST00000547759; ENST00000549080; ENST00000550541; ENST00000551193; ENST00000551451; ENST00000552137; BC022267; OTTHUMT00000403478; OTTHUMT00000403479; OTTHUMT00000403480; OTTHUMT00000403481; OTTHUMT00000403482; OTTHUMT00000403483; OTTHUMT00000403484; OTTHUMT00000403485; OTTHUMT00000403486; …	FAR2	fatty acyl-CoA reductase 2	Multiple_Complex
TC0800007419.hg.1	12,7	11,86	0,1	0,09	T	T	1,79	1,71E-05	0,0006	T	NM_178819; ENST00000396987; ENST00000518628; ENST00000519853; ENST00000519921; ENST00000520223; ENST00000520258; ENST00000521121; ENST00000521184; ENST00000521349; ENST00000521806; ENST00000523906; BC051377; BC061884; OTTHUMT00000377156; OTTHUMT00000377157; OTTHUMT00000377158; OTTHUMT00000377159; OTTHUMT00000377160; OTTHUMT00000377161; OTTHUMT00000377162; OTTHUMT00000377163; OTTHUMT00000377164; O…	GPAT4	glycerol-3-phosphate acyltransferase 4	Multiple_Complex
TC0200013912.hg.1	12,45	13,37	0,17	0,13	T	T	-1,9	1,73E-05	0,0006	T	NM_001304361; NM_152515; NR_130712; ENST00000302450; ENST00000435431; ENST00000461876; ENST00000474331; ENST00000481732; ENST00000497357; BC036217; OTTHUMT00000254082; OTTHUMT00000330653; OTTHUMT00000330654; OTTHUMT00000330655; OTTHUMT00000330656; OTTHUMT00000330657	CKAP2L	cytoskeleton associated protein 2-like	Multiple_Complex
TC0800012190.hg.1	8,4	7,27	0,12	0,26	T	T	2,18	1,73E-05	0,0006	T	NM_030974; NR_038270; ENST00000359551; ENST00000398712; ENST00000525275; ENST00000530216; ENST00000531375; ENST00000532536; ENST00000533184; ENST00000533948; ENST00000534242; ENST00000534435; BC025244; BC034028; OTTHUMT00000382900; OTTHUMT00000382901; OTTHUMT00000382902; OTTHUMT00000382903; OTTHUMT00000382904; OTTHUMT00000382905; OTTHUMT00000382906; OTTHUMT00000382907; OTTHUMT00000382908; OTTHUMT…	SHARPIN	SHANK-associated RH domain interactor	Multiple_Complex
TC1600009677.hg.1	7,54	8,76	0,19	0,23	T	T	-2,33	1,73E-05	0,0006	T	NM_001888; ENST00000219599; ENST00000543948; ENST00000570401; ENST00000571358; ENST00000571666; ENST00000572113; ENST00000572914; ENST00000574448; ENST00000574787; ENST00000576703; BC018061; OTTHUMT00000207398; OTTHUMT00000436536; OTTHUMT00000436537; OTTHUMT00000436538; OTTHUMT00000436539; OTTHUMT00000436540; OTTHUMT00000436541; OTTHUMT00000436542; OTTHUMT00000436543	CRYM	crystallin mu	Multiple_Complex
TC1200011873.hg.1	9,1	8,12	0,18	0,09	T	T	1,97	1,74E-05	0,0006	T	NM_052845; NR_038118; ENST00000420167; ENST00000503497; ENST00000536760; ENST00000537236; ENST00000537496; ENST00000540016; ENST00000541763; ENST00000542390; ENST00000544051; ENST00000545712; BC005054; BC011831; OTTHUMT00000403128; OTTHUMT00000403129; OTTHUMT00000403130; OTTHUMT00000403131; OTTHUMT00000403132; OTTHUMT00000403133; OTTHUMT00000403134; OTTHUMT00000403135; OTTHUMT00000403136; OTTHUMT…	MMAB	methylmalonic aciduria (cobalamin deficiency) cblB type	Multiple_Complex
TC1000008236.hg.1	12,09	12,87	0,12	0,07	T	T	-1,71	1,75E-05	0,0006	T	NM_001128309; NM_030927; ENST00000265450; ENST00000341863; ENST00000372156; ENST00000372157; ENST00000372158; ENST00000372164; ENST00000429989; ENST00000469149; ENST00000481124; ENST00000616406; BC002920; BC093016; OTTHUMT00000049080; OTTHUMT00000049081; OTTHUMT00000049082; OTTHUMT00000049084; OTTHUMT00000049085; OTTHUMT00000049086; OTTHUMT00000049087; OTTHUMT00000049088; OTTHUMT00000049089	TSPAN14	tetraspanin 14	Multiple_Complex
TC0200007205.hg.1	9,05	7,88	0,24	0,17	T	T	2,24	1,76E-05	0,0006	T	NM_001139488; NM_015376; NM_170672; ENST00000402538; ENST00000403687; ENST00000407811; ENST00000419772; ENST00000423159; ENST00000425210; ENST00000437184; ENST00000442390; ENST00000444784; ENST00000468856; ENST00000477927; ENST00000479528; ENST00000482731; ENST00000482857; ENST00000484909; ENST00000490150; ENST00000494927; ENST00000497723; BC027849; OTTHUMT00000325338; OTTHUMT00000325339; OTTHUMT…	RASGRP3	RAS guanyl releasing protein 3 (calcium and DAG-regulated)	Multiple_Complex
TC0600009343.hg.1	7,31	6,19	0,31	0,26	T	T	2,18	1,77E-05	0,0006	T	NM_001040214; NM_001300737; NM_001300738; NM_001300740; NM_153355; ENST00000368416; ENST00000368417; ENST00000476571; ENST00000545433; ENST00000546092; BC035062; OTTHUMT00000042056; OTTHUMT00000042057; OTTHUMT00000042058	NKAIN2	Na+/K+ transporting ATPase interacting 2	Multiple_Complex
TC0200014764.hg.1	7,36	6,05	0,31	0,3	T	F	2,47	1,80E-05	0,0006	F	NM_001935; ENST00000360534; ENST00000413651; ENST00000416189; ENST00000434918; ENST00000461836; ENST00000468903; ENST00000490286; ENST00000491591; ENST00000494507; ENST00000497461; ENST00000628861; BC065265; OTTHUMT00000255079; OTTHUMT00000332715; OTTHUMT00000332716; OTTHUMT00000332717; OTTHUMT00000332718; OTTHUMT00000332719; OTTHUMT00000332720; OTTHUMT00000332721; OTTHUMT00000332723; OTTHUMT0000…	DPP4	dipeptidyl-peptidase 4	Multiple_Complex
TC0200007954.hg.1	12,38	13,2	0,08	0,12	T	T	-1,77	1,83E-05	0,0006	T	NM_016297; ENST00000264441; ENST00000414812; ENST00000422380; ENST00000433351; ENST00000451279; ENST00000480949; BC033815; BC051891; OTTHUMT00000251872; OTTHUMT00000331593; OTTHUMT00000331594; OTTHUMT00000331595; OTTHUMT00000331596; OTTHUMT00000331597	PCYOX1	prenylcysteine oxidase 1	Multiple_Complex
TC0300007055.hg.1	9,36	10,13	0,09	0,07	T	T	-1,71	1,83E-05	0,0006	T	NM_001008392; NM_005808; ENST00000273179; ENST00000310189; ENST00000416688; ENST00000435525; ENST00000436654; ENST00000443503; ENST00000447745; ENST00000486978; OTTHUMT00000342391; OTTHUMT00000342392; OTTHUMT00000342393; OTTHUMT00000342394; OTTHUMT00000342396; OTTHUMT00000342397; OTTHUMT00000342398; OTTHUMT00000342399	CTDSPL	CTD small phosphatase like	Multiple_Complex
TC1600008226.hg.1	14,17	15,05	0,04	0,1	T	T	-1,84	1,83E-05	0,0006	T	NM_001199434; NM_016101; ENST00000254940; ENST00000254941; ENST00000562131; ENST00000562523; ENST00000563364; ENST00000565034; ENST00000567202; ENST00000569637; BC015941; OTTHUMT00000268947; OTTHUMT00000431457; OTTHUMT00000431458; OTTHUMT00000431459; OTTHUMT00000431460; OTTHUMT00000431461; OTTHUMT00000431462; OTTHUMT00000431463	NIP7	NIP7, nucleolar pre-rRNA processing protein	Multiple_Complex
TC1700007674.hg.1	8,89	9,76	0,06	0,15	T	T	-1,83	1,83E-05	0,0006	T	NM_001166105; NM_001291918; NM_001488; NM_133439; ENST00000610834; ENST00000612272; ENST00000614112; ENST00000614122; ENST00000615182; ENST00000615328; ENST00000616284; ENST00000618662; ENST00000619335; ENST00000619777; ENST00000620086; ENST00000620367; ENST00000620628; ENST00000620838; ENST00000621780; ENST00000622085; BC001172; BC011753; OTTHUMT00000477342; OTTHUMT00000477343; OTTHUMT0000047734…	TADA2A	transcriptional adaptor 2A	Multiple_Complex
TC0300012770.hg.1	14,57	15,42	0,02	0,1	T	T	-1,81	1,83E-05	0,0006	T	NM_001184723; NM_138786; ENST00000296059; ENST00000468398; ENST00000470080; ENST00000474754; ENST00000491182; BC014339; OTTHUMT00000356326; OTTHUMT00000356327; OTTHUMT00000356328; OTTHUMT00000356329; OTTHUMT00000356330; uc003exa.3	TM4SF18	transmembrane 4 L six family member 18	Multiple_Complex
TSUnmapped00000144.hg.1	8,35	7,46	0,11	0,13	T	T	1,85	1,86E-05	0,0006	T	ENST00000627160	DUSP16	dual specificity phosphatase 16	NonCoding
TC0700010671.hg.1	13,43	12,74	0,05	0,04	T	T	1,61	1,88E-05	0,0006	T	NM_001191056; NM_001191057; NM_001191058; NM_001191059; NM_005020; ENST00000321453; ENST00000396182; ENST00000396184; ENST00000396189; ENST00000396191; ENST00000396193; ENST00000464881; ENST00000478736; ENST00000479980; ENST00000482681; ENST00000495221; BC022479; BC022525; OTTHUMT00000215075; OTTHUMT00000215076; OTTHUMT00000215077; OTTHUMT00000328456; OTTHUMT00000328457; OTTHUMT00000328458; OTTHU…	PDE1C	phosphodiesterase 1C, calmodulin-dependent 70kDa	Multiple_Complex
TC0200013943.hg.1	13,05	13,9	0,03	0,19	T	T	-1,81	1,89E-05	0,0006	T	NM_025181; NR_104470; ENST00000245680; ENST00000409106; ENST00000409342; ENST00000420066; ENST00000447673; ENST00000459683; ENST00000460863; ENST00000469314; ENST00000469702; ENST00000470204; ENST00000485214; ENST00000498768; BC018537; OTTHUMT00000254150; OTTHUMT00000330970; OTTHUMT00000331369; OTTHUMT00000331370; OTTHUMT00000331371; OTTHUMT00000331372; OTTHUMT00000331373; OTTHUMT00000331374; OTT…	SLC35F5	solute carrier family 35, member F5	Multiple_Complex
TC0900006481.hg.1	9,4	10,83	0,46	0,06	T	T	-2,69	1,90E-05	0,0006	T	NM_001018056; NM_003383; ENST00000382096; ENST00000382099; ENST00000382100; ENST00000478776; BC136562; BC142653; BC144245; OTTHUMT00000051519; OTTHUMT00000051520; OTTHUMT00000051522; OTTHUMT00000051523	VLDLR	very low density lipoprotein receptor	Multiple_Complex
TC0X00011353.hg.1	9,98	10,8	0,05	0,05	T	T	-1,77	1,90E-05	0,0006	T	NM_001031739; NM_001168530; NM_001168531; NM_024087; ENST00000380483; ENST00000380485; ENST00000380488; ENST00000470015; ENST00000473862; ENST00000481384; ENST00000484017; ENST00000546332; BC001244; BC013172; OTTHUMT00000055844; OTTHUMT00000055845; OTTHUMT00000055846; OTTHUMT00000055847; OTTHUMT00000055848; OTTHUMT00000055849; OTTHUMT00000055850	ASB9	ankyrin repeat and SOCS box containing 9	Multiple_Complex
TC1000007847.hg.1	11,07	11,94	0,09	0,17	T	T	-1,83	1,90E-05	0,0006	T	NM_001256267; NM_001256268; NM_032578; NR_045662; NR_045663; ENST00000354393; ENST00000358913; ENST00000373675; ENST00000540630; ENST00000613327; OTTHUMT00000048307; OTTHUMT00000048308; OTTHUMT00000048309	MYPN	myopalladin	Multiple_Complex
TC0X00010926.hg.1	11,75	12,49	0,06	0,03	T	T	-1,67	1,91E-05	0,0006	T	NM_001173516; NM_001173517; NM_024597; ENST00000316077; ENST00000370660; ENST00000370661; ENST00000370663; ENST00000471510; ENST00000477124; ENST00000489788; ENST00000495432; OTTHUMT00000058487; OTTHUMT00000058488; OTTHUMT00000058489; OTTHUMT00000058490; OTTHUMT00000313965; OTTHUMT00000313966; OTTHUMT00000313967	MAP7D3	MAP7 domain containing 3	Multiple_Complex
TC0200009687.hg.1	11,09	12,09	0,01	0,22	T	T	-2	1,91E-05	0,0006	T	NM_152522; NR_024526; ENST00000326446; ENST00000425034; ENST00000455875; ENST00000463690; ENST00000495469; BC028741; BC070140; OTTHUMT00000254852; OTTHUMT00000333577; OTTHUMT00000333578; OTTHUMT00000333579; OTTHUMT00000333580	ARL6IP6	ADP-ribosylation factor like GTPase 6 interacting protein 6	Multiple_Complex
TC0300006968.hg.1	10,68	11,44	0,03	0,1	T	T	-1,69	1,92E-05	0,0006	T	NM_138410; NM_181472; ENST00000334983; ENST00000349718; ENST00000454304; ENST00000464689; ENST00000465248; ENST00000487007; BC010116	CMTM7	CKLF-like MARVEL transmembrane domain containing 7	Multiple_Complex
TC0700008928.hg.1	6,77	7,86	0,27	0,13	T	T	-2,12	1,92E-05	0,0006	T	NM_001105533; NM_024913; ENST00000310396; ENST00000340646; ENST00000423795; ENST00000428526; ENST00000443817; ENST00000450913; ENST00000466055; ENST00000495036; ENST00000520801; ENST00000521774; BC030538; OTTHUMT00000346959; OTTHUMT00000346960; OTTHUMT00000346961; OTTHUMT00000346962; OTTHUMT00000346963; OTTHUMT00000346964; OTTHUMT00000376909; OTTHUMT00000376910; OTTHUMT00000376911; uc003vjt.4	CPED1	cadherin-like and PC-esterase domain containing 1	Multiple_Complex
TC0700008181.hg.1	12,26	13,14	0,08	0,18	T	T	-1,83	1,95E-05	0,0006	T	NM_001256414; NM_002069; ENST00000351004; ENST00000418742; ENST00000442586; ENST00000447650; ENST00000457358; ENST00000490206; BC026326; OTTHUMT00000253254; OTTHUMT00000340228; OTTHUMT00000340229; OTTHUMT00000340230; OTTHUMT00000340231; OTTHUMT00000340232	GNAI1	guanine nucleotide binding protein (G protein), alpha inhibiting activity polypeptide 1	Multiple_Complex
TC0800010631.hg.1	7,09	5,77	0,35	0,15	T	T	2,48	1,95E-05	0,0006	T	NM_000370; ENST00000260116; ENST00000521138; BC058000; OTTHUMT00000378460; OTTHUMT00000378488	TTPA	tocopherol (alpha) transfer protein	Multiple_Complex
TC1000007760.hg.1	7,69	6,17	0,3	0,25	T	T	2,87	1,99E-05	0,0006	T	NM_173554; ENST00000330194; ENST00000389639; BC041932; OTTHUMT00000048228; OTTHUMT00000048230	C10orf107	chromosome 10 open reading frame 107	Coding
TC0100008271.hg.1	11,44	10,61	0,07	0,14	T	T	1,78	1,99E-05	0,0006	T	NM_014372; ENST00000242719; ENST00000486691; ENST00000494873; BC020964; BC047654; OTTHUMT00000022419; OTTHUMT00000022420; OTTHUMT00000091259	RNF11	ring finger protein 11	Multiple_Complex
TC1900008141.hg.1	11,85	12,85	0,08	0,18	T	T	-2	2,00E-05	0,0006	T	NM_030622; ENST00000310054; ENST00000593545; ENST00000593890; ENST00000595590; ENST00000597754; ENST00000600561; BC033691; OTTHUMT00000463287; OTTHUMT00000463288; OTTHUMT00000463290; OTTHUMT00000463291; OTTHUMT00000463645; OTTHUMT00000463646	CYP2S1	cytochrome P450, family 2, subfamily S, polypeptide 1	Multiple_Complex
TC0200007132.hg.1	12,78	12,04	0,08	0,15	T	T	1,67	2,01E-05	0,0006	T	NM_001127399; NM_001127400; NM_001127401; NM_016061; ENST00000261353; ENST00000379519; ENST00000379520; ENST00000402003; ENST00000402708; ENST00000470120; ENST00000482474; ENST00000490211; ENST00000492439; ENST00000495673; BC000836; BC047237; OTTHUMT00000215127; OTTHUMT00000215128; OTTHUMT00000215129; OTTHUMT00000325352; OTTHUMT00000325354; OTTHUMT00000325356; OTTHUMT00000325357; OTTHUMT000003253…	YPEL5	yippee like 5	Multiple_Complex
TC1600008328.hg.1	9,46	10,6	0,12	0,11	T	T	-2,2	2,01E-05	0,0006	T	NM_001361; ENST00000219240; ENST00000571288; ENST00000571392; ENST00000572003; ENST00000572887; ENST00000573843; ENST00000573922; ENST00000574309; ENST00000576145; BC065245; OTTHUMT00000440470; OTTHUMT00000440471; OTTHUMT00000440473; OTTHUMT00000440474; OTTHUMT00000440475; OTTHUMT00000440477; OTTHUMT00000440478; OTTHUMT00000440479	DHODH	dihydroorotate dehydrogenase (quinone)	Multiple_Complex
TC0500011655.hg.1	8,69	7,77	0,11	0,16	T	T	1,89	2,03E-05	0,0007	T	NM_001163315; ENST00000359660; ENST00000481160; ENST00000496714; ENST00000518486; ENST00000542267; ENST00000619412; BC126144; BC126146; OTTHUMT00000357305; OTTHUMT00000357330; OTTHUMT00000357331; OTTHUMT00000374364	FBXL17	F-box and leucine-rich repeat protein 17	Multiple_Complex
TC0300009033.hg.1	8,93	9,79	0,11	0,09	T	T	-1,82	2,05E-05	0,0007	T	NM_001145319; NM_001172312; NM_002670; ENST00000337777; ENST00000457734; ENST00000460104; ENST00000461644; ENST00000464320; ENST00000475296; ENST00000476044; ENST00000483373; ENST00000483507; ENST00000495744; ENST00000497002; ENST00000497199; BC031083; OTTHUMT00000354434; OTTHUMT00000354435; OTTHUMT00000354436; OTTHUMT00000354437; OTTHUMT00000354438; OTTHUMT00000354439; OTTHUMT00000354440; OTTHUM…	PLS1	plastin 1	Multiple_Complex
TC1300009673.hg.1	12,26	13,03	0,09	0,07	T	T	-1,7	2,05E-05	0,0007	T	NM_001286775; NM_001286776; NM_138779; NR_104590; ENST00000376019; ENST00000376021; ENST00000376022; ENST00000376027; ENST00000376029; ENST00000376032; ENST00000487260; BC015148; OTTHUMT00000045691; OTTHUMT00000045692; OTTHUMT00000045693; OTTHUMT00000045694; OTTHUMT00000045695; OTTHUMT00000045696; OTTHUMT00000045697	TEX30	testis expressed 30	Multiple_Complex
TC1200012234.hg.1	12,67	11,94	0,08	0,13	T	T	1,67	2,06E-05	0,0007	T	NM_001247997; NM_002956; NM_198240; ENST00000302528; ENST00000358808; ENST00000361654; ENST00000501271; ENST00000514271; ENST00000535290; ENST00000536634; ENST00000537004; ENST00000537178; ENST00000538120; ENST00000539080; ENST00000540304; ENST00000540338; ENST00000540539; ENST00000541108; ENST00000541410; ENST00000543205; ENST00000545889; ENST00000620786; BC114213; BC117209; BC126305; OTTHUMT000…	CLIP1	CAP-GLY domain containing linker protein 1	Multiple_Complex
TC0800012470.hg.1	7,71	6,09	0,18	0,4	T	T	3,06	2,06E-05	0,0007	T	NM_001145153; NM_144649; ENST00000356838; ENST00000377901; ENST00000517538; ENST00000519016; ENST00000519187; ENST00000519304; ENST00000522334; ENST00000522594; ENST00000523829; BC062592; BC105783; OTTHUMT00000379590; OTTHUMT00000379591; OTTHUMT00000379592; OTTHUMT00000379593; OTTHUMT00000379594; OTTHUMT00000379595; OTTHUMT00000379596; OTTHUMT00000379597; OTTHUMT00000379598	TMEM71	transmembrane protein 71	Multiple_Complex
TC0200016651.hg.1	12,82	11,99	0,21	0,08	T	T	1,78	2,07E-05	0,0007	T	NM_000104; ENST00000490576; ENST00000491456; ENST00000492443; ENST00000494864; ENST00000610745; ENST00000613082; ENST00000614273; BC012049; OTTHUMT00000218580; OTTHUMT00000325643; OTTHUMT00000325644; OTTHUMT00000325645; OTTHUMT00000325646; OTTHUMT00000325647; OTTHUMT00000327013	CYP1B1	cytochrome P450, family 1, subfamily B, polypeptide 1	Multiple_Complex
TC0100017947.hg.1	13,24	12,56	0,05	0,09	T	T	1,61	2,10E-05	0,0007	T	NM_014322; ENST00000366554; ENST00000462265; ENST00000463155; ENST00000469376; ENST00000478849; ENST00000490673; BC036773; OTTHUMT00000095713; OTTHUMT00000095714; OTTHUMT00000095715; OTTHUMT00000095716; OTTHUMT00000097756; OTTHUMT00000099266	OPN3	opsin 3	Multiple_Complex
TC0400012942.hg.1	6,55	5,68	0,03	0,12	T	F	1,83	2,14E-05	0,0007	F	NM_144645; BC016746; OTTHUMT00000253044; OTTHUMT00000253046; OTTHUMT00000363183; OTTHUMT00000363184; OTTHUMT00000363185; OTTHUMT00000363186	C4orf36	chromosome 4 open reading frame 36	Multiple_Complex
TC0400011180.hg.1	12,12	12,86	0,17	0,01	T	T	-1,66	2,17E-05	0,0007	T	NM_001037582; NM_024906; ENST00000273908; ENST00000319540; BC137429; BC137432; OTTHUMT00000252635; OTTHUMT00000252636	SCD5	stearoyl-CoA desaturase 5	Coding
TC0900008879.hg.1	15,46	14,72	0,07	0,11	T	T	1,68	2,18E-05	0,0007	T	NM_001122821; NM_001248000; NM_001248001; NM_003011; ENST00000322030; ENST00000372686; ENST00000372688; ENST00000372692; ENST00000409104; ENST00000454747; ENST00000466009; ENST00000477806; ENST00000480217; ENST00000480536; ENST00000485056; BC032749; OTTHUMT00000054476; OTTHUMT00000054477; OTTHUMT00000054478; OTTHUMT00000054479; OTTHUMT00000054480; OTTHUMT00000326974; OTTHUMT00000326975; OTTHUMT00…	SET	SET nuclear proto-oncogene	Multiple_Complex
TC0300013513.hg.1	14,32	15,09	0,11	0,03	T	T	-1,71	2,21E-05	0,0007	T	NM_001134418; NM_018192; ENST00000319332; ENST00000426003; ENST00000427335; ENST00000444866; ENST00000463171; ENST00000467131; ENST00000470925; ENST00000475095; ENST00000482780; ENST00000490940; BC005029	P3H2	prolyl 3-hydroxylase 2	Multiple_Complex
TC0300013815.hg.1	9,74	9	0,08	0,09	T	T	1,67	2,20E-05	0,0007	T	NM_001205272; ENST00000383748; ENST00000418176; ENST00000463888; OTTHUMT00000344234; OTTHUMT00000344236; OTTHUMT00000344255	KRBOX1	KRAB box domain containing 1	Multiple_Complex
TC0400011234.hg.1	7,89	6,8	0,28	0,08	T	T	2,13	2,21E-05	0,0007	T	NM_002753; NM_138980; NM_138981; NM_138982; ENST00000310816; ENST00000359221; ENST00000361569; ENST00000395157; ENST00000395160; ENST00000395161; ENST00000395166; ENST00000395169; ENST00000430389; ENST00000449047; ENST00000468020; ENST00000472236; ENST00000475679; ENST00000479377; ENST00000486985; ENST00000489368; ENST00000502302; ENST00000503911; ENST00000504397; ENST00000505356; ENST00000506385…	MAPK10	mitogen-activated protein kinase 10	Multiple_Complex
TC0X00007310.hg.1	11,42	12,35	0,15	0,07	T	T	-1,9	2,21E-05	0,0007	T	NM_022117; ENST00000375442; ENST00000463525; ENST00000553557; ENST00000556808; ENST00000578306; ENST00000579390; BC024270; OTTHUMT00000056718; OTTHUMT00000056719; OTTHUMT00000414701; OTTHUMT00000414702; OTTHUMT00000446079; OTTHUMT00000446080	TSPYL2	TSPY-like 2	Multiple_Complex
TC0X00009386.hg.1	9,88	8,96	0,1	0,16	T	T	1,9	2,19E-05	0,0007	T	NM_001170750; NM_001170751; NM_001170752; NM_006307; ENST00000378533; ENST00000432886; ENST00000461865; ENST00000479015; ENST00000538295; ENST00000544439; BC020684; OTTHUMT00000056241; OTTHUMT00000056242; OTTHUMT00000056243	SRPX	sushi-repeat containing protein, X-linked	Multiple_Complex
TC1200007406.hg.1	8,74	7,83	0,17	0,15	T	T	1,87	2,20E-05	0,0007	T	NM_001114182; NM_001145256; NM_001145257; NM_001145258; NM_016123; ENST00000431837; ENST00000440781; ENST00000448290; ENST00000546780; ENST00000547101; ENST00000547521; ENST00000547928; ENST00000550361; ENST00000550386; ENST00000550615; ENST00000550616; ENST00000551736; ENST00000552309; ENST00000613694; BC013316; OTTHUMT00000403943; OTTHUMT00000403944; OTTHUMT00000403945; OTTHUMT00000403946; OTTH…	IRAK4	interleukin 1 receptor associated kinase 4	Multiple_Complex
TC1300009514.hg.1	9,91	8,91	0,09	0,11	T	T	2	2,20E-05	0,0007	T	NM_014934; NM_198968; ENST00000347108; ENST00000361156; ENST00000361396; ENST00000376829; ENST00000466027; ENST00000466569; ENST00000479518; ENST00000485031; BC041804; OTTHUMT00000045494; OTTHUMT00000045495; OTTHUMT00000045496; OTTHUMT00000045497; OTTHUMT00000045498; OTTHUMT00000045499	DZIP1	DAZ interacting zinc finger protein 1	Multiple_Complex
TC1600007112.hg.1	9,94	10,98	0,13	0,14	T	T	-2,06	2,21E-05	0,0007	T	NM_001199022; NM_014711; ENST00000381396; ENST00000396208; ENST00000396212; ENST00000561888; ENST00000562083; ENST00000562616; ENST00000565376; ENST00000566523; ENST00000567451; ENST00000569190; ENST00000573412; BC036654; OTTHUMT00000254283; OTTHUMT00000254284; OTTHUMT00000435943; OTTHUMT00000435944; OTTHUMT00000435945; OTTHUMT00000435946; OTTHUMT00000435947; OTTHUMT00000435948; OTTHUMT0000043594…	CCP110	centriolar coiled coil protein 110kDa	Multiple_Complex
TC0400007422.hg.1	7,13	5,89	0,14	0,23	T	F	2,37	2,24E-05	0,0007	F	NM_020453; ENST00000273859; ENST00000503288; ENST00000504445; ENST00000505277; ENST00000505476; ENST00000507889; ENST00000512393; BC131535; OTTHUMT00000216900; OTTHUMT00000361588; OTTHUMT00000361589; OTTHUMT00000361598; OTTHUMT00000361601; OTTHUMT00000361602; OTTHUMT00000361603	ATP10D	ATPase, class V, type 10D	Multiple_Complex
TC1200011767.hg.1	11,36	10,32	0,06	0,25	T	T	2,06	2,28E-05	0,0007	T	NM_032148; ENST00000258538; ENST00000411411; ENST00000415674; ENST00000417469; ENST00000424946; ENST00000432951; ENST00000433540; ENST00000437220; ENST00000449866; ENST00000549713; BC036734; BC106871; BC106872; OTTHUMT00000346850; OTTHUMT00000346851; OTTHUMT00000346857; OTTHUMT00000346858; OTTHUMT00000346859; OTTHUMT00000346860; OTTHUMT00000346861; OTTHUMT00000346862; OTTHUMT00000346863; OTTHUMT0…	SLC41A2	solute carrier family 41 (magnesium transporter), member 2	Multiple_Complex
TC0500009996.hg.1	12,11	12,77	0,02	0,03	T	T	-1,58	2,29E-05	0,0007	T	NM_001193455; NM_017755; NR_037947; ENST00000264670; ENST00000502932; ENST00000504374; ENST00000505264; ENST00000505892; ENST00000506139; ENST00000507888; ENST00000513888; ENST00000514127; BC137083; OTTHUMT00000206902; OTTHUMT00000365823; OTTHUMT00000365824; OTTHUMT00000365825; OTTHUMT00000365826; OTTHUMT00000365827; OTTHUMT00000365828; OTTHUMT00000365829; OTTHUMT00000365830	NSUN2	NOP2/Sun RNA methyltransferase family, member 2	Multiple_Complex
TC1500007346.hg.1	8,01	6,27	0,21	0,13	T	T	3,35	2,29E-05	0,0007	T	NM_001252335; NM_032866; ENST00000281282; ENST00000557813; ENST00000559194; BC093827; BC112049; BC118918; OTTHUMT00000255482; OTTHUMT00000419380; OTTHUMT00000419381; uc002aeg.3	CGNL1	cingulin-like 1	Multiple_Complex
TC0600010991.hg.1	10,18	9,22	0,07	0,23	T	T	1,93	2,32E-05	0,0007	T	NM_001080480; NR_073465; ENST00000324607; BC150650; BC150652; OTTHUMT00000039980	MBOAT1	membrane bound O-acyltransferase domain containing 1	Multiple_Complex
TC0700009386.hg.1	10,06	10,92	0,15	0,06	T	T	-1,82	2,35E-05	0,0007	T	NM_001195278; ENST00000563442; ENST00000565468; ENST00000610315; OTTHUMT00000420337; OTTHUMT00000420376	TMEM178B	transmembrane protein 178B	Multiple_Complex
TC0200015082.hg.1	9,36	8,21	0,13	0,24	T	T	2,22	2,37E-05	0,0007	T	NM_001135212; NM_181342; ENST00000233092; ENST00000412612; ENST00000419184; ENST00000424785; ENST00000434643; ENST00000435079; ENST00000464248; ENST00000470945; BC009711; OTTHUMT00000255783; OTTHUMT00000335258; OTTHUMT00000335259; OTTHUMT00000335260; OTTHUMT00000335261; OTTHUMT00000335262; OTTHUMT00000335263; OTTHUMT00000375757	FKBP7	FK506 binding protein 7	Multiple_Complex
TC0X00010329.hg.1	14,23	13,36	0,03	0,17	T	T	1,83	2,37E-05	0,0007	T	NM_001278740; NM_001278741; NM_001278742; NM_001278743; NM_003270; ENST00000373020; ENST00000494424; ENST00000496771; ENST00000612152; ENST00000614008; BC012389; OTTHUMT00000057483; OTTHUMT00000057484; OTTHUMT00000057485	TSPAN6	tetraspanin 6	Multiple_Complex
TC0400008892.hg.1	9,65	10,69	0,11	0,23	T	T	-2,05	2,37E-05	0,0007	T	NM_022475; ENST00000296575; ENST00000434550; ENST00000503090; ENST00000505891; ENST00000509630; ENST00000511314; ENST00000512791; ENST00000515080; BC025311; OTTHUMT00000364887; OTTHUMT00000364888; OTTHUMT00000364889; OTTHUMT00000364890; OTTHUMT00000364891; OTTHUMT00000364892; OTTHUMT00000364906; OTTHUMT00000364907	HHIP	hedgehog interacting protein	Multiple_Complex
TC1900011271.hg.1	6,6	5,61	0,09	0,29	T	T	1,99	2,43E-05	0,0007	T	NM_001193306; NM_002029; ENST00000304748; ENST00000594900; ENST00000595042; ENST00000600815; BC005315; OTTHUMT00000466905; OTTHUMT00000466906; OTTHUMT00000466907; OTTHUMT00000466954	FPR1	formyl peptide receptor 1	Coding
TC1100010400.hg.1	12,74	13,59	0,03	0,08	T	T	-1,8	2,45E-05	0,0008	T	NM_018490; ENST00000379214; ENST00000389858; ENST00000480977; ENST00000489910; ENST00000527773; ENST00000530658; BC033039; OTTHUMT00000257467; OTTHUMT00000257468; OTTHUMT00000257469; OTTHUMT00000257471; OTTHUMT00000388402; OTTHUMT00000388403	LGR4	leucine-rich repeat containing G protein-coupled receptor 4	Multiple_Complex
TC1900009439.hg.1	7,52	5,72	0,37	0,15	T	F	3,48	2,47E-05	0,0008	F	NM_001252; ENST00000245903; ENST00000423145; ENST00000597430; BC000725; OTTHUMT00000457859; OTTHUMT00000457860; OTTHUMT00000457861; uc002mfi.3	CD70	CD70 molecule	Multiple_Complex
TC0700010749.hg.1	10,44	11,33	0,12	0,12	T	T	-1,85	2,48E-05	0,0008	T	NM_001100425; NM_001199706; NM_001199707; NM_001199708; NM_001300956; NM_015314; ENST00000297063; ENST00000317020; ENST00000338533; ENST00000415803; ENST00000429651; ENST00000431396; ENST00000436884; ENST00000440378; ENST00000453212; ENST00000480192; ENST00000483360; ENST00000483526; ENST00000493327; BC028678; BC056191; BC110422; BC136362; BC144032; OTTHUMT00000337717; OTTHUMT00000337718; OTTHUMT…	KIAA0895	KIAA0895	Multiple_Complex
TC1900007839.hg.1	14,5	13,76	0,06	0,06	T	T	1,67	2,51E-05	0,0008	T	NM_001164605; NM_014164; NM_144779; NR_028406; ENST00000342879; ENST00000392217; ENST00000392218; ENST00000392219; ENST00000423817; ENST00000496493; ENST00000541435; ENST00000543307; ENST00000586925; ENST00000588699; ENST00000590686; ENST00000591716; ENST00000592290; BC009642; OTTHUMT00000109443; OTTHUMT00000109444; OTTHUMT00000109445; OTTHUMT00000109446; OTTHUMT00000109447; OTTHUMT00000460660; O…	FXYD5	FXYD domain containing ion transport regulator 5	Multiple_Complex
TC2200007361.hg.1	11,25	12,23	0,11	0,16	T	T	-1,98	2,52E-05	0,0008	T	NM_020243; ENST00000216034; ENST00000492561; BC009363; OTTHUMT00000320842; OTTHUMT00000320843	TOMM22	translocase of outer mitochondrial membrane 22 homolog (yeast)	Multiple_Complex
TC1400010624.hg.1	10,66	11,45	0,07	0,06	T	T	-1,72	2,53E-05	0,0008	T	NM_001146154; NM_001146155; NM_152444; ENST00000267568; ENST00000553326; ENST00000553813; ENST00000555228; ENST00000555976; ENST00000556219; BC059364; OTTHUMT00000412574; OTTHUMT00000412576; OTTHUMT00000412577; OTTHUMT00000412578; OTTHUMT00000412579; OTTHUMT00000472036	PTGR2	prostaglandin reductase 2	Multiple_Complex
TC0900009776.hg.1	8,94	8,03	0,12	0,19	T	T	1,87	2,54E-05	0,0008	T	NM_024761; ENST00000262244; ENST00000603061; BC033027; OTTHUMT00000051974; OTTHUMT00000468413	MOB3B	MOB kinase activator 3B	Multiple_Complex
TC0100007365.hg.1	7,13	8,45	0,47	0,01	T	T	-2,49	2,58E-05	0,0008	T	NM_020448; ENST00000003912; ENST00000339255; ENST00000358028; ENST00000374399; ENST00000432012; ENST00000475663; ENST00000488155; BC001265; BC063583; OTTHUMT00000009178; OTTHUMT00000009179; OTTHUMT00000009180; OTTHUMT00000009181; OTTHUMT00000009182; OTTHUMT00000009183; OTTHUMT00000276996	NIPAL3	NIPA-like domain containing 3	Multiple_Complex
TC1700012206.hg.1	5,35	6,59	0,1	0,25	T	T	-2,36	2,58E-05	0,0008	T	NM_001291904; NM_001291905_3; OTTHUMT00000480776; OTTHUMT00000480777; uc002gvb.2; uc060cjd.1	LOC79999; LOC388436; RP11-744A16.4	uncharacterized LOC79999; Homo sapiens uncharacterized protein ENSP00000382042 (LOC388436), mRNA.; novel transcript	Multiple_Complex
TC2100007208.hg.1	8,91	7,48	0,13	0,21	T	T	2,69	2,58E-05	0,0008	T	NM_001144925; NM_001178046; NM_001282920; NM_002462; ENST00000288383; ENST00000398598; ENST00000398600; ENST00000413778; ENST00000417963; ENST00000419044; ENST00000424365; ENST00000427464; ENST00000441677; ENST00000455164; ENST00000467510; ENST00000468506; ENST00000478268; ENST00000484465; ENST00000486275; ENST00000490220; ENST00000491110; ENST00000619682; BC032602; OTTHUMT00000195161; OTTHUMT000…	MX1	MX dynamin-like GTPase 1	Multiple_Complex
TC0600012652.hg.1	9,97	9,01	0,06	0,24	T	T	1,94	2,59E-05	0,0008	T	NM_032511; ENST00000389677; ENST00000461803; ENST00000480148; ENST00000538471; BC004869; BC011583; OTTHUMT00000041589; OTTHUMT00000041590; OTTHUMT00000041591	FAXC	failed axon connections homolog	Multiple_Complex
TC1200011519.hg.1	11,87	11,06	0,11	0,03	T	T	1,75	2,60E-05	0,0008	T	NM_003566; ENST00000322349; ENST00000418984; ENST00000547833; ENST00000549790; ENST00000553019; OTTHUMT00000407304; OTTHUMT00000407305; OTTHUMT00000407306; OTTHUMT00000407307; OTTHUMT00000407308	EEA1	early endosome antigen 1	Multiple_Complex
TC1500010888.hg.1	9,27	8,43	0,07	0,11	T	T	1,79	2,60E-05	0,0008	T	NM_020214; ENST00000260376; ENST00000287196; ENST00000413097; ENST00000419739; ENST00000544520; ENST00000564610; ENST00000565443; ENST00000565999; ENST00000566831; ENST00000566844; ENST00000566991; ENST00000567042; ENST00000567263; ENST00000567440; ENST00000567633; ENST00000567974; ENST00000568213; ENST00000568360; ENST00000569173; ENST00000569795; ENST00000569890; ENST00000569972; ENST0000061617…	PARP6	poly(ADP-ribose) polymerase family member 6	Multiple_Complex
TC1600011408.hg.1	11,48	12,25	0,14	0,11	T	T	-1,71	2,59E-05	0,0008	T	NM_001040138; NM_016326; NM_016951; NM_181640; NM_181641; ENST00000264001; ENST00000345436; ENST00000351137; ENST00000362093; ENST00000417030; ENST00000526149; ENST00000532838; ENST00000534692; ENST00000563092; BC004380; BC091478; OTTHUMT00000268816; OTTHUMT00000268817; OTTHUMT00000268818; OTTHUMT00000268819; OTTHUMT00000393186; OTTHUMT00000393187; OTTHUMT00000393188; OTTHUMT00000393189; OTTHUMT0…	CKLF; CKLF-CMTM1	chemokine-like factor; CKLF-CMTM1 readthrough	Multiple_Complex
TC0200014771.hg.1	8,4	7,26	0,17	0,38	T	T	2,2	2,61E-05	0,0008	T	NM_001291807; NM_004460; ENST00000188790; ENST00000422436; ENST00000443424; ENST00000447386; ENST00000450031; ENST00000461506; ENST00000462608; ENST00000465088; ENST00000465424; ENST00000480044; ENST00000480838; ENST00000493182; ENST00000497414; ENST00000627638; BC026250; OTTHUMT00000332852; OTTHUMT00000332854; OTTHUMT00000332855; OTTHUMT00000332856; OTTHUMT00000332857; OTTHUMT00000332858; OTTHUM…	FAP	fibroblast activation protein alpha	Multiple_Complex
TC1000010917.hg.1	7,24	8,18	0,08	0,28	T	T	-1,91	2,64E-05	0,0008	T	NM_001278211; NM_001278212; NM_001278213; NM_001278214; NM_018205; NM_018239; NM_207119; NR_103467; NR_103468; ENST00000355790; ENST00000357631; ENST00000358141; ENST00000373224; ENST00000395010; ENST00000395011; ENST00000446961; BC024001; OTTHUMT00000048507; OTTHUMT00000048508; OTTHUMT00000048509; OTTHUMT00000048510; OTTHUMT00000091337	LRRC20	leucine rich repeat containing 20	Multiple_Complex
TC2100008527.hg.1	7,09	5,57	0,18	0,09	T	T	2,88	2,64E-05	0,0008	T	NM_018964; ENST00000352133; ENST00000398341; ENST00000398343; ENST00000471277; ENST00000484887; ENST00000487951; ENST00000496416; OTTHUMT00000195374; OTTHUMT00000195376; OTTHUMT00000195377; OTTHUMT00000195378; OTTHUMT00000195386; OTTHUMT00000195387; OTTHUMT00000195388; uc002zbi.3; uc002zbj.3	SLC37A1	solute carrier family 37 (glucose-6-phosphate transporter), member 1	Multiple_Complex
TC1600008141.hg.1	14,31	15,05	0,01	0,06	T	T	-1,66	2,65E-05	0,0008	T	NM_001755; NM_022845; ENST00000290858; ENST00000412916; ENST00000561924; ENST00000563939; ENST00000564034; ENST00000565389; ENST00000566281; ENST00000567947; ENST00000568858; BC018509; OTTHUMT00000268843; OTTHUMT00000421057; OTTHUMT00000421058; OTTHUMT00000421059; OTTHUMT00000421060; OTTHUMT00000421061; OTTHUMT00000421062; OTTHUMT00000421063; OTTHUMT00000421064	CBFB	core-binding factor, beta subunit	Multiple_Complex
TC0300008691.hg.1	10,49	9,34	0,28	0,12	T	T	2,23	2,67E-05	0,0008	T	NM_032242; ENST00000393409; ENST00000503234; ENST00000503363; ENST00000505278; OTTHUMT00000356451; OTTHUMT00000356452; OTTHUMT00000356453; OTTHUMT00000356454; uc003ejg.3	PLXNA1	plexin A1	Multiple_Complex
TC0X00007267.hg.1	11,19	10,27	0,13	0,15	T	T	1,89	2,67E-05	0,0008	T	NM_001005332; NM_001005333; NM_006986; ENST00000326587; ENST00000375695; ENST00000375722; ENST00000375772; ENST00000470461; ENST00000473931; ENST00000482188; ENST00000482599; ENST00000485420; ENST00000494718; BC014070; BC032473; OTTHUMT00000056589; OTTHUMT00000056590; OTTHUMT00000056591; OTTHUMT00000056592; OTTHUMT00000056593; OTTHUMT00000056594; OTTHUMT00000056596; OTTHUMT00000056597; OTTHUMT000…	MAGED1	MAGE family member D1	Multiple_Complex
TC1400007328.hg.1	10,76	9,73	0,1	0,22	T	T	2,05	2,66E-05	0,0008	T	NM_001270520; NM_014992; ENST00000360909; ENST00000395125; ENST00000553307; ENST00000553472; ENST00000553966; ENST00000554459; ENST00000555651; ENST00000556135; ENST00000556596; ENST00000556894; ENST00000557029; ENST00000557327; ENST00000557628; BC038428; BC064999; OTTHUMT00000276942; OTTHUMT00000411330; OTTHUMT00000411418; OTTHUMT00000411419; OTTHUMT00000411421; OTTHUMT00000411422; OTTHUMT000004…	DAAM1	dishevelled associated activator of morphogenesis 1	Multiple_Complex
TC1500010796.hg.1	9,81	9,07	0,1	0,14	T	T	1,67	2,66E-05	0,0008	T	NM_015286; NM_145728; ENST00000328642; ENST00000336292; ENST00000594047; BC151243; OTTHUMT00000415655; OTTHUMT00000415699; OTTHUMT00000415700	SYNM	synemin, intermediate filament protein	Multiple_Complex
TC0800007221.hg.1	14,89	14,18	0,02	0,05	T	T	1,64	2,67E-05	0,0008	T	NM_001159995; NM_001159996; NM_001159999; NM_001160001; NM_001160002; NM_001160004; NM_001160005; NM_001160007; NM_001160008; NM_004495; NM_013956; NM_013957; NM_013958; NM_013959; NM_013960; NM_013962; NM_013964; ENST00000287842; ENST00000356819; ENST00000405005; ENST00000517967; ENST00000518084; ENST00000518104; ENST00000518206; ENST00000519240; ENST00000519301; ENST00000520407; ENST00000520502…	NRG1	neuregulin 1	Multiple_Complex
TC0100017716.hg.1	8,9	10,15	0,1	0,14	T	T	-2,38	2,70E-05	0,0008	T	NM_198552; NR_031593; ENST00000366654; ENST00000408363; ENST00000466258; ENST00000494111; BC009447; OTTHUMT00000092652; OTTHUMT00000092653; OTTHUMT00000099227; uc021pkk.1	FAM89A; MIR1182	family with sequence similarity 89, member A; microRNA 1182	Multiple_Complex
TC1200012864.hg.1	10,13	9,01	0,3	0,13	T	T	2,18	2,70E-05	0,0008	T	NM_001304958; NM_001304959; NM_001304960; NM_001304961; NM_025140; ENST00000238156; ENST00000535556; ENST00000539551; ENST00000539761; ENST00000545037; ENST00000545135; ENST00000545891; BC017186; OTTHUMT00000400358; OTTHUMT00000400779; OTTHUMT00000400780; OTTHUMT00000400791; OTTHUMT00000400792; OTTHUMT00000400793; OTTHUMT00000400794	CCDC92	coiled-coil domain containing 92	Multiple_Complex
TC2000010010.hg.1	11,72	12,54	0,11	0,11	T	T	-1,76	2,70E-05	0,0008	T	NM_001167820; NM_001167821; NM_001167822; NM_001167823; NM_006698; ENST00000373537; ENST00000397131; ENST00000397134; ENST00000397135; ENST00000397137; ENST00000414080; ENST00000414542; ENST00000432507; ENST00000445723; ENST00000456058; BC047692; BC071704; OTTHUMT00000079113; OTTHUMT00000276651; OTTHUMT00000276652; OTTHUMT00000276653; OTTHUMT00000276654; OTTHUMT00000276655; OTTHUMT00000276656; OT…	BLCAP	bladder cancer associated protein	Multiple_Complex
TC2200008837.hg.1	10,87	11,71	0,17	0,05	T	T	-1,79	2,69E-05	0,0008	T	NM_001003796; NM_005008; ENST00000215956; ENST00000355257; ENST00000401959; ENST00000402458; ENST00000463675; ENST00000469028; ENST00000469522; ENST00000488571; BC005358; BC095439; OTTHUMT00000321681; OTTHUMT00000321682; OTTHUMT00000321683; OTTHUMT00000321684; OTTHUMT00000321685; OTTHUMT00000321905; OTTHUMT00000321906; OTTHUMT00000321907	SNU13	SNU13 homolog, small nuclear ribonucleoprotein (U4/U6.U5)	Multiple_Complex
TC0X00006616.hg.1	7,3	8,13	0,09	0,15	T	T	-1,77	2,71E-05	0,0008	T	NM_014728; ENST00000380682; ENST00000616992; BC113700; BC113702; BC143746; OTTHUMT00000055771; uc004cuz.2	FRMPD4	FERM and PDZ domain containing 4	Coding
TC1400009710.hg.1	9,25	9,99	0,08	0,07	T	T	-1,67	2,72E-05	0,0008	T	NM_001107; NM_001302616; NM_001302617; NR_126393; NR_126394; NR_126395; ENST00000238618; ENST00000357971; ENST00000553302; ENST00000555135; ENST00000555463; ENST00000555694; BC035568; OTTHUMT00000415013; OTTHUMT00000415014; OTTHUMT00000415015; OTTHUMT00000415016; OTTHUMT00000415017; OTTHUMT00000415018	ACYP1	acylphosphatase 1, erythrocyte (common) type	Multiple_Complex
TC0700009236.hg.1	13,31	12,6	0,02	0,11	T	T	1,63	2,73E-05	0,0008	T	NM_004342; NM_033138; NM_033139; NM_033140; NM_033157; ENST00000361675; ENST00000361901; ENST00000393118; ENST00000417172; ENST00000422748; ENST00000424922; ENST00000430085; ENST00000435928; ENST00000436461; ENST00000443197; ENST00000445569; ENST00000454108; ENST00000462181; ENST00000466704; ENST00000472096; ENST00000473714; ENST00000475772; ENST00000478075; ENST00000480638; ENST00000482470; ENST…	CALD1	caldesmon 1	Multiple_Complex
TC2000007476.hg.1	11,41	12,3	0,11	0,15	T	T	-1,85	2,77E-05	0,0008	T	NM_006282; ENST00000372801; ENST00000372806; ENST00000474717; ENST00000480745; ENST00000487587; ENST00000488618; ENST00000499879; BC093768; OTTHUMT00000080399; OTTHUMT00000080401; OTTHUMT00000107189; OTTHUMT00000107190; OTTHUMT00000107191; OTTHUMT00000127823	STK4	serine/threonine kinase 4	Multiple_Complex
TC1000006858.hg.1	12,62	13,29	0,04	0,04	T	T	-1,58	2,78E-05	0,0008	T	NM_001278205; NM_016299; NR_103464; ENST00000378372; ENST00000437161; ENST00000441647; ENST00000470430; ENST00000493178; ENST00000493863; BC119690; OTTHUMT00000046910; OTTHUMT00000046912; OTTHUMT00000046913; OTTHUMT00000046914; OTTHUMT00000046915; OTTHUMT00000046917	HSPA14	heat shock 70kDa protein 14	Multiple_Complex
TC0100015445.hg.1	6,89	5,95	0,15	0,19	T	T	1,91	2,79E-05	0,0008	T	NM_152380; ENST00000207157; ENST00000369429; ENST00000449873; BC122553; OTTHUMT00000034080; OTTHUMT00000034351; OTTHUMT00000034352	TBX15	T-box 15	Multiple_Complex
TC0200016455.hg.1	9,17	10,3	0,29	0,04	T	T	-2,19	2,80E-05	0,0008	T	NM_001143959; NM_001143960; ENST00000398622; ENST00000426997; ENST00000432605; ENST00000464909; ENST00000488469; ENST00000489686; OTTHUMT00000325481; OTTHUMT00000325685; OTTHUMT00000474409; OTTHUMT00000474410; OTTHUMT00000474411; uc010ypm.1	C2orf74	chromosome 2 open reading frame 74	Multiple_Complex
TC0600012116.hg.1	11,34	10,06	0,16	0,3	T	T	2,43	2,81E-05	0,0008	T	NM_030820; ENST00000244728; ENST00000370817; ENST00000370819; ENST00000456983; ENST00000461489; ENST00000467045; ENST00000467216; ENST00000469682; ENST00000482933; ENST00000484987; ENST00000488912; ENST00000535941; BC045597; BC126108; BC143865	COL21A1	collagen, type XXI, alpha 1	Multiple_Complex
TC1200007897.hg.1	10,42	9,35	0,03	0,27	T	T	2,1	2,84E-05	0,0008	T	NM_005981; ENST00000257910; ENST00000546922; ENST00000546993; ENST00000547311; ENST00000547472; ENST00000547992; ENST00000548093; ENST00000548167; ENST00000549052; ENST00000550528; ENST00000550791; ENST00000552816; ENST00000553089; ENST00000553221; BC010377	TSPAN31	tetraspanin 31	Multiple_Complex
TC1800007411.hg.1	14,2	15,31	0,06	0,35	T	T	-2,16	2,84E-05	0,0008	T	NM_001144964; NM_001144965; NM_001144966; NM_001144967; NM_001144968; NM_001144969; NM_001144970; NM_001144971; NM_001243960; NM_015277; ENST00000256830; ENST00000356462; ENST00000357895; ENST00000382850; ENST00000400345; ENST00000431212; ENST00000435432; ENST00000456173; ENST00000456986; ENST00000585323; ENST00000585363; ENST00000585594; ENST00000585970; ENST00000586263; ENST00000586268; ENST000…	NEDD4L	neural precursor cell expressed, developmentally down-regulated 4-like, E3 ubiquitin protein ligase	Multiple_Complex
TC0800011285.hg.1	11,71	10,89	0,14	0,06	T	T	1,77	2,85E-05	0,0008	T	NM_001042510; NM_001267708; NM_001267709; NM_016096; ENST00000311212; ENST00000517844; ENST00000518071; ENST00000518336; ENST00000519103; ENST00000519744; ENST00000519882; ENST00000519916; ENST00000520347; ENST00000520454; ENST00000520498; ENST00000520984; ENST00000521272; ENST00000523146; ENST00000523922; BC015925; BC068524; OTTHUMT00000380470; OTTHUMT00000380471; OTTHUMT00000380472; OTTHUMT0000…	ZNF706	zinc finger protein 706	Multiple_Complex
TC0400012821.hg.1	8,85	9,8	0,26	0,06	T	T	-1,93	2,86E-05	0,0008	T	NM_001206997; NM_152770; ENST00000358105; ENST00000502497; ENST00000503883; ENST00000508314; ENST00000508675; ENST00000512931; ENST00000513920; ENST00000514249; ENST00000621014; BC034296; OTTHUMT00000252629; OTTHUMT00000362874; OTTHUMT00000362875; OTTHUMT00000363112; OTTHUMT00000363113; OTTHUMT00000363114; OTTHUMT00000363115; OTTHUMT00000363116; uc003hmf.3	C4orf22	chromosome 4 open reading frame 22	Multiple_Complex
TC1600008228.hg.1	15,03	15,71	0,01	0,03	T	T	-1,6	2,87E-05	0,0008	T	NM_030579; ENST00000307892; ENST00000512062; ENST00000514123; ENST00000515314; ENST00000561792; ENST00000568237; ENST00000568342; BC004373; BC014431; OTTHUMT00000256606; OTTHUMT00000359439; OTTHUMT00000359440; OTTHUMT00000431497; OTTHUMT00000431498; OTTHUMT00000431499; uc002exg.1	CYB5B	cytochrome b5 type B (outer mitochondrial membrane)	Multiple_Complex
TC2000008852.hg.1	8,82	9,73	0,11	0,11	T	T	-1,88	2,89E-05	0,0008	T	NM_001256798; NM_080616; ENST00000201961; ENST00000326071; ENST00000359676; ENST00000375677; ENST00000375678; ENST00000419612; ENST00000470428; ENST00000475781; ENST00000485364; ENST00000616976; ENST00000621426; BC065370; OTTHUMT00000078628; OTTHUMT00000078629; OTTHUMT00000078630; OTTHUMT00000078631; OTTHUMT00000078632; OTTHUMT00000078633; OTTHUMT00000078634; OTTHUMT00000078635; OTTHUMT00000078636	NOL4L	nucleolar protein 4-like	Multiple_Complex
TC0800008032.hg.1	12,63	11,75	0,14	0,07	T	T	1,84	2,92E-05	0,0008	T	NM_016010; ENST00000263849; ENST00000519307; ENST00000521176; ENST00000521873; BC009074; OTTHUMT00000379423; OTTHUMT00000379424; OTTHUMT00000379425; OTTHUMT00000379426	ZC2HC1A	zinc finger, C2HC-type containing 1A	Multiple_Complex
TC0600008209.hg.1	9,91	10,7	0,1	0,17	T	T	-1,73	2,93E-05	0,0009	T	NM_018132; ENST00000335783; BC016279; OTTHUMT00000040855	CENPQ	centromere protein Q	Coding
TC0100014995.hg.1	14,67	13,98	0,05	0,04	T	T	1,62	2,93E-05	0,0009	T	NM_001286055; NM_001286056; NM_001839; ENST00000370206; ENST00000394202; ENST00000415017; ENST00000461018; ENST00000474409; ENST00000487539; ENST00000545882; BC025372; OTTHUMT00000029702; OTTHUMT00000029703; OTTHUMT00000029704; OTTHUMT00000029705; OTTHUMT00000029706	CNN3	calponin 3, acidic	Multiple_Complex
TC0500010497.hg.1	10,03	9,12	0,15	0,1	T	T	1,87	2,96E-05	0,0009	T	NM_001085411; NM_001287340; NM_001287341; NM_153013; ENST00000282512; ENST00000381937; ENST00000397338; ENST00000404560; ENST00000502355; ENST00000506945; ENST00000509225; ENST00000511088; ENST00000511613; ENST00000514504; ENST00000617628; BC062567; OTTHUMT00000253767; OTTHUMT00000367540; OTTHUMT00000367541; OTTHUMT00000367542; OTTHUMT00000367543; OTTHUMT00000367544; OTTHUMT00000367545; OTTHUMT00…	NADK2	NAD kinase 2, mitochondrial	Multiple_Complex
TC0600012952.hg.1	11,05	11,88	0,06	0,02	T	T	-1,78	2,96E-05	0,0009	T	NM_002031; ENST00000606080; BC012916; OTTHUMT00000041924	FRK	fyn-related Src family tyrosine kinase	Coding
TC0900006522.hg.1	6,15	7,25	0,16	0,04	T	T	-2,15	2,96E-05	0,0009	T	NM_004170; ENST00000262352; ENST00000422398; ENST00000490167; BC033040; OTTHUMT00000051571; OTTHUMT00000051572; OTTHUMT00000051573	SLC1A1	solute carrier family 1 (neuronal/epithelial high affinity glutamate transporter, system Xag), member 1	Multiple_Complex
TC0700011831.hg.1	5,85	6,92	0,28	0,14	T	T	-2,1	2,99E-05	0,0009	T	NM_000446; ENST00000222381; ENST00000433729; ENST00000462594; ENST00000470502; BC074719; OTTHUMT00000332865; OTTHUMT00000332955; OTTHUMT00000332956; OTTHUMT00000333869	PON1	paraoxonase 1	Multiple_Complex
TC1000011213.hg.1	6,48	4,51	0,75	0,16	T	F	3,92	3,00E-05	0,0009	F	NM_000429; ENST00000372213; ENST00000455001; ENST00000480845; ENST00000485270; BC018359; OTTHUMT00000049070; OTTHUMT00000049071; OTTHUMT00000049072; OTTHUMT00000049073	MAT1A	methionine adenosyltransferase I, alpha	Multiple_Complex
TC1400010068.hg.1	11,39	12,13	0,12	0,06	T	T	-1,67	3,00E-05	0,0009	T	NM_001195573; NM_001271282; NM_001291628; NM_030621; NM_177438; ENST00000343455; ENST00000393063; ENST00000526495; ENST00000527414; ENST00000527416; ENST00000527554; ENST00000529206; ENST00000529720; ENST00000531162; ENST00000532458; ENST00000532939; ENST00000541352; ENST00000554367; ENST00000556045; ENST00000556681; BC150287; OTTHUMT00000387996; OTTHUMT00000387997; OTTHUMT00000387998; OTTHUMT000…	DICER1	dicer 1, ribonuclease type III	Multiple_Complex
TC1700007444.hg.1	12,31	13,01	0,02	0,17	T	T	-1,62	3,06E-05	0,0009	T	NM_001261467; NM_032141; NR_029945; ENST00000247026; ENST00000362201; ENST00000394826; ENST00000467446; ENST00000475652; ENST00000479218; ENST00000540900; ENST00000577289; ENST00000580103; ENST00000581048; ENST00000583301; ENST00000584154; ENST00000584317; ENST00000584423; ENST00000585881; ENST00000588614; ENST00000589608; ENST00000612959; BC040118; BC105044; BC105046; OTTHUMT00000256121; OTTHUMT…	NSRP1; MIR423	nuclear speckle splicing regulatory protein 1; microRNA 423	Multiple_Complex
TC0600014320.hg.1	8,59	9,4	0,12	0,08	T	T	-1,75	3,08E-05	0,0009	T	NM_001080508; ENST00000369663; ENST00000606325; ENST00000606521; ENST00000606621; ENST00000607343; BC132715; BC157841; OTTHUMT00000041378; OTTHUMT00000470354; OTTHUMT00000470355; OTTHUMT00000470356; OTTHUMT00000470357	TBX18	T-box 18	Multiple_Complex
TC0400012949.hg.1	10,4	9,51	0,21	0,19	T	T	1,85	3,11E-05	0,0009	T	NM_001135146; NM_001135147; NM_001135148; NM_022154; ENST00000356736; ENST00000394833; ENST00000424970; ENST00000510255; ENST00000512337; ENST00000512657; ENST00000514000; BC012125; OTTHUMT00000253797; OTTHUMT00000253798; OTTHUMT00000363567; OTTHUMT00000363568; OTTHUMT00000363569; OTTHUMT00000363570; OTTHUMT00000363572	SLC39A8	solute carrier family 39 (zinc transporter), member 8	Multiple_Complex
TC1900010391.hg.1	11,88	11,08	0,11	0,04	T	T	1,74	3,12E-05	0,0009	T	NM_000285; NM_001166056; NM_001166057; ENST00000244137; ENST00000397032; ENST00000436370; ENST00000588328; ENST00000588719; ENST00000589598; ENST00000590408; ENST00000590731; ENST00000590755; ENST00000591968; ENST00000593085; ENST00000593163; ENST00000609145; BC004305; BC015027; BC028295; OTTHUMT00000451429; OTTHUMT00000451430; OTTHUMT00000451431; OTTHUMT00000451432; OTTHUMT00000451433; OTTHUMT00…	PEPD	peptidase D	Multiple_Complex
TC1200011245.hg.1	7,48	5,63	0,16	0,62	T	T	3,61	3,14E-05	0,0009	T	NM_001109754; NM_001206971; NM_001206972; NM_002837; ENST00000261266; ENST00000334414; ENST00000451516; ENST00000538174; ENST00000538708; ENST00000547715; ENST00000548122; ENST00000549400; ENST00000550358; ENST00000550857; ENST00000551525; ENST00000552253; BC101679; BC113463; BC143356; BC143360	PTPRB	protein tyrosine phosphatase, receptor type, B	Multiple_Complex
TC0100012734.hg.1	9,15	7,58	0,44	0,16	T	T	2,96	3,15E-05	0,0009	T	NM_001561; ENST00000377507; ENST00000474475; ENST00000492571; ENST00000615230; BC006196; OTTHUMT00000003622; OTTHUMT00000003623; OTTHUMT00000083600	TNFRSF9	tumor necrosis factor receptor superfamily, member 9	Coding
TC0400011253.hg.1	8,98	10,14	0,17	0,37	T	T	-2,23	3,16E-05	0,0009	T	NM_001292003; NM_001292006; NM_001292007; NM_020803; NR_120447; ENST00000273963; ENST00000425278; ENST00000498875; ENST00000504029; ENST00000505388; ENST00000506274; ENST00000506985; ENST00000512111; BC041384; OTTHUMT00000253040; OTTHUMT00000363203; OTTHUMT00000363204; OTTHUMT00000363205; OTTHUMT00000363206; OTTHUMT00000363207; OTTHUMT00000363208; OTTHUMT00000363209	KLHL8	kelch-like family member 8	Multiple_Complex
TC0400009519.hg.1	10,06	9,23	0,14	0,1	T	T	1,77	3,17E-05	0,0009	T	NM_031953; ENST00000264694; ENST00000504273; ENST00000504959; ENST00000506896; ENST00000512853; ENST00000513433; ENST00000618785; BC029868; OTTHUMT00000360756; OTTHUMT00000360757; OTTHUMT00000360758; OTTHUMT00000360759; OTTHUMT00000360760; OTTHUMT00000360761	SNX25	sorting nexin 25	Multiple_Complex
TC0800006864.hg.1	10,7	9,89	0,18	0,04	T	T	1,75	3,19E-05	0,0009	T	NM_016353; ENST00000262096; ENST00000517334; ENST00000522184; ENST00000523132; BC039253; BC050272; OTTHUMT00000376014; OTTHUMT00000376015; OTTHUMT00000376016; OTTHUMT00000377087	ZDHHC2	zinc finger, DHHC-type containing 2	Multiple_Complex
TC0X00006758.hg.1	10,13	11,07	0,11	0,19	T	T	-1,92	3,19E-05	0,0009	T	NM_001168647; NM_001168648; NM_001168649; NM_014927; ENST00000279451; ENST00000379510; ENST00000425654; ENST00000479158; ENST00000480138; ENST00000485012; ENST00000543067; BC126121; BC136289; BC143839; OTTHUMT00000056017; OTTHUMT00000056018; OTTHUMT00000056019; OTTHUMT00000056020; OTTHUMT00000056021; uc011mjn.2	CNKSR2	connector enhancer of kinase suppressor of Ras 2	Multiple_Complex
TC0700007149.hg.1	9,09	8,07	0,13	0,29	T	T	2,03	3,21E-05	0,0009	T	NM_133468; ENST00000297161; ENST00000436222; ENST00000444773; ENST00000448280; ENST00000476525; ENST00000494786; ENST00000496609; BC060868; OTTHUMT00000250570; OTTHUMT00000328959; OTTHUMT00000328960; OTTHUMT00000328961; OTTHUMT00000328962; OTTHUMT00000328963; OTTHUMT00000328964; uc011kap.2	BMPER	BMP binding endothelial regulator	Multiple_Complex
TC0800010002.hg.1	11,09	11,92	0,12	0,12	T	T	-1,78	3,20E-05	0,0009	T	NM_001394; NM_057158; ENST00000240100; ENST00000240101; BC002671; BC014565; OTTHUMT00000257249; OTTHUMT00000257250	DUSP4	dual specificity phosphatase 4	Multiple_Complex
TC1600011060.hg.1	14,15	14,82	0,04	0,12	T	T	-1,59	3,25E-05	0,0009	T	NM_021149; ENST00000262428; ENST00000561707; ENST00000564057; ENST00000564662; ENST00000567278; ENST00000567786; BC010039; BC010884; BC016702; BC042970; BC053682; OTTHUMT00000269075; OTTHUMT00000433431; OTTHUMT00000433648; OTTHUMT00000433649; OTTHUMT00000433651; OTTHUMT00000433652	COTL1	coactosin-like F-actin binding protein 1	Multiple_Complex
TC1500010886.hg.1	8,87	9,96	0,28	0,05	T	T	-2,14	3,26E-05	0,0009	T	NM_001031733; NM_001286694; NM_001286695; NM_033429; NR_104583; ENST00000354678; ENST00000395463; ENST00000395465; ENST00000448060; ENST00000467188; ENST00000467889; ENST00000478113; ENST00000540479; OTTHUMT00000257067; OTTHUMT00000313445; OTTHUMT00000313446; OTTHUMT00000313447; OTTHUMT00000313448; OTTHUMT00000313449; OTTHUMT00000384140	CALML4	calmodulin-like 4	Multiple_Complex
TC0500011352.hg.1	14,57	13,9	0,04	0,04	T	T	1,59	3,29E-05	0,0009	T	NM_001278642; NM_005711; ENST00000296591; ENST00000380138; ENST00000507663; ENST00000510271; BC030828; BC053656; OTTHUMT00000239258; OTTHUMT00000369773; OTTHUMT00000369774; OTTHUMT00000369776	EDIL3	EGF-like repeats and discoidin I-like domains 3	Multiple_Complex
TC1300008400.hg.1	8,61	7,29	0,2	0,27	T	T	2,51	3,28E-05	0,0009	T	NM_001007538; ENST00000319420; BC132898; BC137092; OTTHUMT00000044239	SHISA2	shisa family member 2	Coding
TC1600006597.hg.1	10,29	9,38	0,16	0,12	T	T	1,87	3,30E-05	0,0009	T	NM_001199173; NM_001199174; NM_001199175; NM_022372; ENST00000301724; ENST00000382450; ENST00000397124; ENST00000561651; ENST00000562043; ENST00000562239; ENST00000562352; ENST00000562392; ENST00000562479; ENST00000562844; ENST00000562851; ENST00000563067; ENST00000563107; ENST00000563179; ENST00000564088; ENST00000564294; ENST00000564319; ENST00000564679; ENST00000565250; ENST00000565269; ENST00…	MLST8	MTOR associated protein, LST8 homolog	Multiple_Complex
TC1200007816.hg.1	6,1	7,6	0,43	0,26	T	T	-2,82	3,31E-05	0,0009	T	NM_001345; NM_201444; NM_201445; NM_201554; ENST00000331886; ENST00000394147; ENST00000402956; ENST00000432422; ENST00000546878; ENST00000546895; ENST00000546995; ENST00000547015; ENST00000547324; ENST00000547358; ENST00000547535; ENST00000548047; ENST00000548378; ENST00000548407; ENST00000548479; ENST00000548491; ENST00000548549; ENST00000549079; ENST00000549085; ENST00000549097; ENST00000549323…	DGKA	diacylglycerol kinase alpha	Multiple_Complex
TC0600008447.hg.1	7,08	8,41	0,27	0,28	T	T	-2,5	3,32E-05	0,0009	T	NM_001704; ENST00000238918; ENST00000370598; ENST00000546190; ENST00000603207; ENST00000604969; BC111720	ADGRB3	adhesion G protein-coupled receptor B3	Multiple_Complex
TC0100006675.hg.1	8,96	8,26	0,18	0,16	T	T	1,63	3,32E-05	0,0009	T	NM_001199860; NM_001199861; NM_001199862; NM_001199863; NM_003636; NM_172130; ENST00000164247; ENST00000341524; ENST00000352527; ENST00000378083; ENST00000378092; ENST00000378097; ENST00000378111; ENST00000389632; ENST00000428161; ENST00000435937; ENST00000445501; ENST00000458166; ENST00000459822; ENST00000462676; ENST00000472700; ENST00000478098; ENST00000481789; ENST00000493807; ENST00000602612…	KCNAB2	potassium channel, voltage gated subfamily A regulatory beta subunit 2	Multiple_Complex
TC0400012251.hg.1	12,15	11,5	0,08	0,03	T	T	1,56	3,34E-05	0,0009	T	NM_001008393; NR_077234; NR_077235; ENST00000379205; ENST00000508457; ENST00000508836; BC065017; BC094775; OTTHUMT00000366378; OTTHUMT00000366379; OTTHUMT00000366380	C4orf46	chromosome 4 open reading frame 46	Multiple_Complex
TC1900008042.hg.1	11,42	10,52	0,08	0,07	T	T	1,86	3,35E-05	0,0009	T	NM_001014831; NM_001014832; NM_001014834; NM_001014835; NM_005884; ENST00000321944; ENST00000358301; ENST00000360442; ENST00000593480; ENST00000593690; ENST00000597715; ENST00000597766; ENST00000599386; ENST00000599470; ENST00000599657; ENST00000600350; ENST00000602004; BC002921; BC011368; BC025282; BC034511	PAK4	p21 protein (Cdc42/Rac)-activated kinase 4	Multiple_Complex
TC0X00008381.hg.1	9,27	10,19	0,15	0,19	T	T	-1,9	3,36E-05	0,0009	T	NM_000276; NM_001587; ENST00000357121; ENST00000371113; ENST00000463271; ENST00000486673; BC094726; BC130612; BC144106; OTTHUMT00000058917; OTTHUMT00000058918; OTTHUMT00000058919; OTTHUMT00000058921	OCRL	oculocerebrorenal syndrome of Lowe	Multiple_Complex
TC0X00008759.hg.1	12,31	11,49	0,1	0,13	T	T	1,76	3,37E-05	0,0009	T	NM_001129765; NM_015922; ENST00000370274; ENST00000432467; ENST00000440023; BC000245; BC007816; OTTHUMT00000060927; OTTHUMT00000060928; uc004fgt.1	NSDHL	NAD(P) dependent steroid dehydrogenase-like	Multiple_Complex
TC0500011702.hg.1	11,98	10,72	0,28	0,16	T	T	2,39	3,38E-05	0,0009	T	NM_001308056; NM_001308057; NM_001308058; NM_001308059; NM_001308060; NM_001308061; NM_139164; NR_131752; NR_131753; NR_131754; ENST00000296632; ENST00000455172; ENST00000502322; ENST00000502931; ENST00000505803; ENST00000508215; ENST00000509887; ENST00000510346; ENST00000511137; ENST00000511436; ENST00000511569; ENST00000512160; BC042956; OTTHUMT00000250720; OTTHUMT00000370739; OTTHUMT0000037074…	STARD4	StAR-related lipid transfer domain containing 4	Multiple_Complex
TC0600011948.hg.1	6,94	5,86	0,14	0,12	T	F	2,12	3,37E-05	0,0009	F	NM_001278738; NM_001278739; NM_016593; ENST00000275016; ENST00000476076; ENST00000480804; ENST00000489657; ENST00000619708; BC010358; OTTHUMT00000040787; OTTHUMT00000040788; OTTHUMT00000040789; OTTHUMT00000040790	CYP39A1	cytochrome P450, family 39, subfamily A, polypeptide 1	Multiple_Complex
TC1900011985.hg.1	9,4	8,54	0,05	0,17	T	T	1,81	3,39E-05	0,0009	T	NM_004943; ENST00000270223; ENST00000377735; ENST00000537879; ENST00000597053; ENST00000598237; ENST00000601370; ENST00000602469; ENST00000602829; OTTHUMT00000402062; OTTHUMT00000402063; OTTHUMT00000402064; OTTHUMT00000461654; OTTHUMT00000461655; OTTHUMT00000461656; OTTHUMT00000467549; OTTHUMT00000467550	DMWD	dystrophia myotonica, WD repeat containing	Multiple_Complex
TC0500013241.hg.1	10,69	10,01	0,13	0,09	T	T	1,6	3,41E-05	0,0009	T	NM_015669; ENST00000231134; ENST00000623915; BC001186; OTTHUMT00000251811; OTTHUMT00000478869	PCDHB5	protocadherin beta 5	Coding
TC0200012098.hg.1	6,55	7,36	0,12	0,1	T	T	-1,75	3,43E-05	0,0009	T	NM_001287580; NM_022128; NR_028308; ENST00000302188; ENST00000449378; ENST00000453412; ENST00000458185; ENST00000612015; BC017425; OTTHUMT00000215118; OTTHUMT00000324576; OTTHUMT00000324577; OTTHUMT00000324578	RBKS; BRE-AS1	ribokinase; BRE antisense RNA 1	Multiple_Complex
TC0200007908.hg.1	14,12	13,3	0,05	0,04	T	T	1,77	3,45E-05	0,0010	T	NM_018153; NM_032208; NM_053034; ENST00000303714; ENST00000409349; ENST00000409829; ENST00000463335; ENST00000481119; ENST00000482235; ENST00000497197; BC012074; OTTHUMT00000251770; OTTHUMT00000327211; OTTHUMT00000327258; OTTHUMT00000327259; OTTHUMT00000327260; OTTHUMT00000327262; OTTHUMT00000327263	ANTXR1	anthrax toxin receptor 1	Multiple_Complex
TC1400009108.hg.1	11,09	11,99	0,1	0,18	T	T	-1,88	3,46E-05	0,0010	T	NM_001197330; NM_001197331; NM_002692; ENST00000216367; ENST00000539565; ENST00000553805; ENST00000553850; ENST00000554377; ENST00000554396; ENST00000554671; ENST00000554851; ENST00000555724; ENST00000556584; ENST00000556937; BC112962; BC126218; BC126220; OTTHUMT00000410510; OTTHUMT00000410511; OTTHUMT00000410512; OTTHUMT00000410513; OTTHUMT00000410514; OTTHUMT00000410515; OTTHUMT00000410516; OTT…	POLE2	polymerase (DNA directed), epsilon 2, accessory subunit	Multiple_Complex
TC1200008269.hg.1	9,68	10,42	0,23	0,16	T	T	-1,67	3,48E-05	0,0010	T	NM_001024383; NM_014903; ENST00000397909; ENST00000536525; ENST00000547725; ENST00000547884; ENST00000548948; ENST00000549369; ENST00000549464; ENST00000550503; ENST00000550673; ENST00000550788; ENST00000551162; ENST00000551277; ENST00000552300; ENST00000552895; OTTHUMT00000406810; OTTHUMT00000406811; OTTHUMT00000406812; OTTHUMT00000406813; OTTHUMT00000406814; OTTHUMT00000406815; OTTHUMT000004068…	NAV3	neuron navigator 3	Multiple_Complex
TC0200016589.hg.1	8,77	9,55	0,11	0,15	T	T	-1,72	3,50E-05	0,0010	T	NM_153689; ENST00000319974; BC036456; OTTHUMT00000335446; uc010zhb.2	C2orf69	chromosome 2 open reading frame 69	Multiple_Complex
TC0100015594.hg.1	7,65	6,33	0,29	0,14	T	T	2,49	3,53E-05	0,0010	T	NM_001303040; NM_001303041; NM_003637; ENST00000369304; ENST00000468261; ENST00000481236; ENST00000539363; BC140831; BC144637; OTTHUMT00000038537; OTTHUMT00000038538; OTTHUMT00000100717	ITGA10	integrin alpha 10	Multiple_Complex
TC0200014597.hg.1	14,48	13,76	0,04	0,13	T	T	1,65	3,53E-05	0,0010	T	NM_001254738; NM_005168; ENST00000263895; ENST00000375734; ENST00000409557; ENST00000439275; ENST00000454202; ENST00000466334; ENST00000472416; ENST00000473639; ENST00000497865; BC012513; OTTHUMT00000254808; OTTHUMT00000254809; OTTHUMT00000332342; OTTHUMT00000332343; OTTHUMT00000332344; OTTHUMT00000332345; OTTHUMT00000332346; OTTHUMT00000332347; OTTHUMT00000332348	RND3	Rho family GTPase 3	Multiple_Complex
TC0300012029.hg.1	13,79	14,47	0,12	0,05	T	T	-1,6	3,51E-05	0,0010	T	NM_001308445; NM_025146; ENST00000240922; ENST00000467022; ENST00000477813; ENST00000478020; ENST00000481432; ENST00000493454; ENST00000493900; ENST00000497255; ENST00000497525; ENST00000616174; ENST00000630058; BC012731; OTTHUMT00000354446; OTTHUMT00000354447; OTTHUMT00000354448; OTTHUMT00000354449; OTTHUMT00000354452; OTTHUMT00000354453; OTTHUMT00000354454; OTTHUMT00000354455; OTTHUMT00000354456	NAA50	N(alpha)-acetyltransferase 50, NatE catalytic subunit	Multiple_Complex
TC0500007780.hg.1	12,72	13,56	0,22	0,08	T	T	-1,79	3,50E-05	0,0010	T	NM_001080479; NM_001177693; NM_001244364; ENST00000296794; ENST00000296799; ENST00000426542; ENST00000437974; ENST00000503341; ENST00000504003; ENST00000506334; ENST00000509848; ENST00000510131; ENST00000510312; ENST00000512883; ENST00000513042; ENST00000513841; ENST00000545377; BC157846; BC171850; OTTHUMT00000368972; OTTHUMT00000368973; OTTHUMT00000368974; OTTHUMT00000368975; OTTHUMT00000368976;…	ARHGEF28	Rho guanine nucleotide exchange factor 28	Multiple_Complex
TC0600007084.hg.1	12,12	12,78	0,09	0,03	T	T	-1,58	3,53E-05	0,0010	T	NM_001143941; NM_001143942; NM_153020; ENST00000318204; ENST00000379052; ENST00000425446; ENST00000503965; ENST00000504055; ENST00000508508; ENST00000509686; ENST00000510826; BC104808; BC104810; OTTHUMT00000039946; OTTHUMT00000039947; OTTHUMT00000367751; OTTHUMT00000367752; OTTHUMT00000367753; OTTHUMT00000367754; OTTHUMT00000367755; OTTHUMT00000367756	RBM24	RNA binding motif protein 24	Multiple_Complex
TC0800010553.hg.1	13,67	12,94	0,07	0,13	T	T	1,66	3,52E-05	0,0010	T	NM_001144772; NM_003580; ENST00000038176; ENST00000427130; ENST00000517612; ENST00000518159; ENST00000518229; ENST00000519166; ENST00000519174; ENST00000519227; ENST00000519858; ENST00000519871; ENST00000521712; ENST00000521972; ENST00000522645; ENST00000523106; ENST00000523177; ENST00000523982; ENST00000524148; BC041124; OTTHUMT00000378384; OTTHUMT00000378385; OTTHUMT00000378386; OTTHUMT00000378…	NSMAF	neutral sphingomyelinase activation associated factor	Multiple_Complex
TC0900011393.hg.1	7,73	6,65	0,09	0,25	T	T	2,12	3,51E-05	0,0010	T	NM_001190945; NM_001190947; NM_005658; ENST00000373887; ENST00000540010; ENST00000546084; BC024145; OTTHUMT00000053843; uc010mvl.2; uc011lyg.2	TRAF1	TNF receptor-associated factor 1	Multiple_Complex
TC1100007307.hg.1	11,27	10,45	0,1	0,1	T	T	1,76	3,53E-05	0,0010	T	NM_001276722; NM_001276723; NM_001276724; NM_001276725; NM_001276726; NM_001276727; NM_138787; NR_077243; ENST00000334307; ENST00000347206; ENST00000446510; ENST00000524539; ENST00000527108; ENST00000528092; ENST00000530697; ENST00000531554; ENST00000532470; ENST00000534635; ENST00000617650; BC009561; BC051031; OTTHUMT00000389567; OTTHUMT00000389568; OTTHUMT00000389569; OTTHUMT00000389570; OTTHUM…	C11orf74	chromosome 11 open reading frame 74	Multiple_Complex
TC0100017094.hg.1	13,67	14,42	0,04	0,03	T	T	-1,69	3,55E-05	0,0010	T	NM_001123168; BC035696; BC137545; BC146978; BC146992; OTTHUMT00000100825; OTTHUMT00000100826; OTTHUMT00000100827; OTTHUMT00000100828; OTTHUMT00000100829; OTTHUMT00000100830; OTTHUMT00000100831; OTTHUMT00000470337	FAM72A	family with sequence similarity 72, member A	Multiple_Complex
TC0300011448.hg.1	11,62	12,68	0,15	0,24	T	T	-2,08	3,58E-05	0,0010	T	NM_001278689; NM_173654; NR_103826; ENST00000295571; ENST00000383701; ENST00000403140; ENST00000424374; ENST00000456376; ENST00000480846; ENST00000496647; ENST00000540764; ENST00000540955; ENST00000615922; BC060887; OTTHUMT00000343722; OTTHUMT00000343723; OTTHUMT00000343724; OTTHUMT00000343725; OTTHUMT00000343726; OTTHUMT00000343727; OTTHUMT00000343728	EOGT	EGF domain-specific O-linked N-acetylglucosamine (GlcNAc) transferase	Multiple_Complex
TC1600011483.hg.1	12,18	11,45	0,06	0,08	T	T	1,65	3,61E-05	0,0010	T	NM_001136472; NM_001136473; NM_004862; NR_024320; ENST00000339430; ENST00000381810; ENST00000413364; ENST00000570798; ENST00000570904; ENST00000571277; ENST00000571459; ENST00000571627; ENST00000571688; ENST00000571976; ENST00000572255; ENST00000573332; ENST00000574701; ENST00000574703; ENST00000574763; ENST00000575426; ENST00000620789; ENST00000622633; BC000053; BC008309; BC016491; BC039840; BC0…	LITAF	lipopolysaccharide-induced TNF factor	Multiple_Complex
TC0200009895.hg.1	13,02	13,76	0,16	0,02	T	T	-1,67	3,61E-05	0,0010	T	NM_001256126; NM_203463; ENST00000305747; ENST00000392687; BC109284; BC109285; OTTHUMT00000255235; OTTHUMT00000255236	CERS6	ceramide synthase 6	Multiple_Complex
TC1100012389.hg.1	10,26	9,53	0,01	0,11	T	T	1,66	3,62E-05	0,0010	T	NM_001098517; NM_001301043; NM_001301044; NM_001301045; NM_014333; ENST00000331581; ENST00000441886; ENST00000452722; ENST00000536727; ENST00000536781; ENST00000537058; ENST00000537140; ENST00000540373; ENST00000540852; ENST00000540951; ENST00000541434; ENST00000542447; ENST00000542450; ENST00000543249; ENST00000543375; ENST00000543540; ENST00000545094; ENST00000545380; ENST00000545960; ENST00000…	CADM1	cell adhesion molecule 1	Multiple_Complex
TC0700012115.hg.1	9,61	10,26	0,07	0,07	T	T	-1,56	3,71E-05	0,0010	T	NM_001122838; NM_198990; ENST00000341533; ENST00000414118; ENST00000417955; ENST00000418294; ENST00000420631; ENST00000422589; ENST00000425379; ENST00000427257; ENST00000465647; ENST00000479761; BC071604; OTTHUMT00000347903; OTTHUMT00000347904; OTTHUMT00000347905; OTTHUMT00000347906; OTTHUMT00000347907; OTTHUMT00000347908; OTTHUMT00000347909; OTTHUMT00000347910; OTTHUMT00000347911; OTTHUMT0000034…	NAPEPLD	N-acyl phosphatidylethanolamine phospholipase D	Multiple_Complex
TC0500008014.hg.1	11,58	10,81	0,09	0,09	T	T	1,71	3,74E-05	0,0010	T	NM_002890; NM_022650; ENST00000274376; ENST00000456692; ENST00000506290; ENST00000509953; ENST00000512763; ENST00000515800; BC033015; OTTHUMT00000369729; OTTHUMT00000369730; OTTHUMT00000369731; OTTHUMT00000369732; OTTHUMT00000369733; OTTHUMT00000369735	RASA1	RAS p21 protein activator (GTPase activating protein) 1	Multiple_Complex
TC1600008128.hg.1	10,36	9,51	0,06	0,26	T	T	1,8	3,76E-05	0,0010	T	NM_144601; NM_181553; NR_037613; NR_037619; ENST00000361909; ENST00000424011; ENST00000460097; ENST00000562357; ENST00000562707; ENST00000563672; ENST00000564060; ENST00000564247; ENST00000565003; ENST00000565666; ENST00000565922; ENST00000566121; ENST00000566756; ENST00000567572; ENST00000568477; BC023509; BC023591; BC036042; BC040227; BC047701; OTTHUMT00000268814; OTTHUMT00000268815; OTTHUMT000…	CMTM3	CKLF-like MARVEL transmembrane domain containing 3	Multiple_Complex
TC1600009865.hg.1	13,72	12,84	0,05	0,23	T	T	1,85	3,76E-05	0,0010	T	NM_001042483; NM_012385; ENST00000324873; ENST00000395641; ENST00000567646; BC002434; OTTHUMT00000254692; OTTHUMT00000430974; OTTHUMT00000430975	NUPR1	nuclear protein 1, transcriptional regulator	Multiple_Complex
TC1600010978.hg.1	6,9	8,16	0,13	0,4	T	T	-2,41	3,80E-05	0,0010	T	NM_001076780; NM_001278423; NM_001278425; NM_052892; NR_126532; ENST00000299598; ENST00000337114; ENST00000525539; ENST00000526632; ENST00000527937; ENST00000529079; ENST00000529791; ENST00000530363; ENST00000531391; ENST00000533478; ENST00000534142; ENST00000534447; ENST00000614230; OTTHUMT00000387968; OTTHUMT00000387969; OTTHUMT00000387970; OTTHUMT00000387972; OTTHUMT00000387973; OTTHUMT0000038…	PKD1L2	polycystic kidney disease 1-like 2 (gene/pseudogene)	Multiple_Complex
TC2200008719.hg.1	10,9	10,12	0,09	0,08	T	T	1,71	3,81E-05	0,0010	T	NM_001303494; NM_014292; ENST00000216083; ENST00000407418; ENST00000469420; BC012111; BC064900; OTTHUMT00000318190; OTTHUMT00000318191; OTTHUMT00000318192	CBX6	chromobox homolog 6	Multiple_Complex
TC0900012155.hg.1	10,84	11,5	0,03	0,03	T	T	-1,57	3,84E-05	0,0010	T	NM_001198812; OTTHUMT00000365240	MSANTD3-TMEFF1	MSANTD3-TMEFF1 readthrough	Coding
TC1200010866.hg.1	13,67	12,89	0,12	0,04	T	T	1,71	3,85E-05	0,0010	T	NM_001257389; NM_001257390; NM_001257391; NM_001257392; NM_001257400; NM_001257401; NM_001267698; NM_001780; ENST00000257857; ENST00000420846; ENST00000546457; ENST00000546939; ENST00000548117; ENST00000548160; ENST00000548898; ENST00000549117; ENST00000550050; ENST00000550776; ENST00000551173; ENST00000552067; ENST00000552164; ENST00000552692; ENST00000552754; ENST00000555199; BC002349; BC013017	CD63	CD63 molecule	Multiple_Complex
TC0500009097.hg.1	12	11,01	0,09	0,21	T	T	1,99	3,87E-05	0,0010	T	NM_001109974; NM_001166208; NM_001166209; NM_007286; ENST00000307662; ENST00000394243; ENST00000518872; ENST00000519664; ENST00000522122; BC142683; BC146665; OTTHUMT00000252370; OTTHUMT00000252371; OTTHUMT00000380638; OTTHUMT00000380639; OTTHUMT00000380640	SYNPO	synaptopodin	Multiple_Complex
TC1100011514.hg.1	14	13,27	0,06	0,08	T	T	1,65	3,98E-05	0,0011	T	NM_001163817; NM_001360; ENST00000355527; ENST00000407721; ENST00000525137; ENST00000525346; ENST00000526780; ENST00000527316; ENST00000527452; ENST00000529990; ENST00000531364; ENST00000533800; ENST00000534701; ENST00000534795; BC000054; OTTHUMT00000394241; OTTHUMT00000394242; OTTHUMT00000394243; OTTHUMT00000394244; OTTHUMT00000394246; OTTHUMT00000394248; OTTHUMT00000394249; OTTHUMT00000394250; …	DHCR7	7-dehydrocholesterol reductase	Multiple_Complex
TC0800011601.hg.1	7,85	6,63	0,17	0,17	T	T	2,32	3,99E-05	0,0011	T	NM_001101676; NM_207506; NR_109794; ENST00000314727; ENST00000409003; ENST00000445741; ENST00000453675; ENST00000524796; ENST00000526328; ENST00000526765; ENST00000527515; BC121818; BC124554; OTTHUMT00000132989; OTTHUMT00000143864; OTTHUMT00000330658; OTTHUMT00000381869; OTTHUMT00000381870; OTTHUMT00000381871; OTTHUMT00000381872	SAMD12	sterile alpha motif domain containing 12	Multiple_Complex
TC0700012224.hg.1	12,99	13,86	0,18	0,08	T	T	-1,83	4,00E-05	0,0011	T	NM_002291; ENST00000222399; ENST00000393559; ENST00000393560; ENST00000393561; ENST00000439976; ENST00000468518; ENST00000468999; ENST00000470995; ENST00000472714; ENST00000474380; ENST00000476039; ENST00000479448; ENST00000491196; BC113455; OTTHUMT00000314584; OTTHUMT00000314585; OTTHUMT00000314586; OTTHUMT00000314587; OTTHUMT00000314588; OTTHUMT00000314589; OTTHUMT00000314590; OTTHUMT0000031459…	LAMB1	laminin, beta 1	Multiple_Complex
TC1400008056.hg.1	7,61	6,8	0,08	0,15	T	T	1,76	4,00E-05	0,0011	T	NM_001288952; NM_001288954; NM_001288956; NM_001288957; NM_001288958; NM_001288959; NM_001288960; NM_001288995; NM_005532; ENST00000555081; ENST00000555819; ENST00000557700; ENST00000611954; ENST00000612499; ENST00000612813; ENST00000614204; ENST00000614288; ENST00000614648; ENST00000616764; ENST00000618200; ENST00000618863; ENST00000620066; ENST00000620396; ENST00000621160; BC015492; OTTHUMT0000…	IFI27	interferon, alpha-inducible protein 27	Multiple_Complex
TC0300010930.hg.1	8,28	7,11	0,17	0,42	T	T	2,25	4,02E-05	0,0011	T	NM_020208; NM_022405; ENST00000353278; ENST00000358525; ENST00000413781; ENST00000456124; ENST00000470226; ENST00000473146; ENST00000493980; BC126197; BC136431; BC144087; OTTHUMT00000257318; OTTHUMT00000257319; OTTHUMT00000345232; OTTHUMT00000345233; OTTHUMT00000345234; OTTHUMT00000345235	SLC6A20	solute carrier family 6 (proline IMINO transporter), member 20	Multiple_Complex
TC0200013899.hg.1	9,93	11,03	0,25	0,15	T	T	-2,14	4,05E-05	0,0011	T	NM_032494; ENST00000272570; ENST00000409573; ENST00000464305; ENST00000466259; ENST00000474234; ENST00000476902; ENST00000495264; ENST00000615791; BC032001; OTTHUMT00000330521; OTTHUMT00000330554; OTTHUMT00000330555; OTTHUMT00000330556; OTTHUMT00000330557; OTTHUMT00000330558	ZC3H8	zinc finger CCCH-type containing 8	Multiple_Complex
TC0500008632.hg.1	8,86	7,92	0,06	0,12	T	T	1,92	4,06E-05	0,0011	T	NM_001308122; NM_003060; ENST00000245407; ENST00000415928; ENST00000435065; ENST00000437841; ENST00000447841; ENST00000448810; ENST00000461013; ENST00000475308; ENST00000479605; BC012325; OTTHUMT00000132631; OTTHUMT00000132632; OTTHUMT00000132633; OTTHUMT00000148100; OTTHUMT00000148101; OTTHUMT00000148102; OTTHUMT00000315757; OTTHUMT00000339918	SLC22A5	solute carrier family 22 (organic cation/carnitine transporter), member 5	Multiple_Complex
TC1000012600.hg.1	9,57	10,27	0,12	0,09	T	T	-1,62	4,06E-05	0,0011	T	NM_001204364; NM_152644; NR_037911; ENST00000368896; ENST00000368898; ENST00000462859; ENST00000489000; BC031343; OTTHUMT00000050825; OTTHUMT00000050826; OTTHUMT00000050827; OTTHUMT00000050828	FAM24B	family with sequence similarity 24, member B	Multiple_Complex
TC1800008070.hg.1	9,67	8,38	0,41	0,12	T	T	2,44	4,06E-05	0,0011	T	NM_022068; ENST00000302079; ENST00000383408; ENST00000503781; ENST00000538948; ENST00000578145; ENST00000579112; ENST00000579151; ENST00000579899; ENST00000579949; ENST00000580640; ENST00000581680; ENST00000582913; ENST00000582937; ENST00000583325; OTTHUMT00000254528; OTTHUMT00000442331; OTTHUMT00000442332; OTTHUMT00000442333; OTTHUMT00000442385; OTTHUMT00000442451; OTTHUMT00000442452; OTTHUMT000…	PIEZO2	piezo-type mechanosensitive ion channel component 2	Multiple_Complex
TC1600010792.hg.1	9,46	10,72	0,38	0,16	T	T	-2,41	4,08E-05	0,0011	T	NM_001289003; NM_015020; ENST00000393524; ENST00000538126; ENST00000564884; ENST00000567016; ENST00000568004; ENST00000568954; ENST00000574977; BC129927; OTTHUMT00000434137; OTTHUMT00000434138; OTTHUMT00000434139; OTTHUMT00000434140; OTTHUMT00000434141; OTTHUMT00000434142; OTTHUMT00000437827	PHLPP2	PH domain and leucine rich repeat protein phosphatase 2	Multiple_Complex
TC1600010859.hg.1	8,09	9,29	0,27	0,24	T	T	-2,29	4,09E-05	0,0011	T	NM_001142497; NM_152649; ENST00000306247; ENST00000308807; ENST00000570846; ENST00000571303; ENST00000573267; ENST00000575686; ENST00000575695; ENST00000576529; BC028141; OTTHUMT00000436402; OTTHUMT00000436403; OTTHUMT00000436404; OTTHUMT00000436405; OTTHUMT00000436502; OTTHUMT00000436503; OTTHUMT00000436504; OTTHUMT00000436505	MLKL	mixed lineage kinase domain-like	Multiple_Complex
TC1200010038.hg.1	11,48	10,8	0,02	0,08	T	T	1,6	4,13E-05	0,0011	T	NM_004447; ENST00000281172; ENST00000508018; ENST00000535734; ENST00000535752; ENST00000536793; ENST00000536956; ENST00000540613; ENST00000541465; ENST00000542903; ENST00000543363; ENST00000543468; ENST00000543523; ENST00000543612; ENST00000544064; ENST00000545610; ENST00000546261; ENST00000546311; BC030010	EPS8	epidermal growth factor receptor pathway substrate 8	Multiple_Complex
TC2100007037.hg.1	8,1	7,38	0,07	0,08	T	T	1,65	4,14E-05	0,0011	T	NM_001236; ENST00000290354; BC002812; OTTHUMT00000194632	CBR3	carbonyl reductase 3	Multiple_Complex
TC1200012617.hg.1	8,71	8,03	0,07	0,03	T	T	1,6	4,18E-05	0,0011	T	NM_001304480; NM_001304483; NM_001304484; NM_139241; ENST00000395740; ENST00000427716; ENST00000472289; ENST00000473513; ENST00000479023; ENST00000493087; ENST00000494275; ENST00000494977; ENST00000497153; ENST00000525053; ENST00000546442; ENST00000551984; ENST00000583694; BC045552; OTTHUMT00000268017; OTTHUMT00000268018; OTTHUMT00000268019; OTTHUMT00000268020; OTTHUMT00000268021; OTTHUMT00000268…	FGD4	FYVE, RhoGEF and PH domain containing 4	Multiple_Complex
TC1600011362.hg.1	7,95	8,9	0,17	0,12	T	T	-1,93	4,30E-05	0,0011	T	NM_005622; NM_202000; ENST00000289416; ENST00000440284; ENST00000561499; ENST00000561795; ENST00000562251; ENST00000563914; ENST00000564701; ENST00000567006; ENST00000567387; ENST00000567711; ENST00000569141; BC002790; OTTHUMT00000254414; OTTHUMT00000435923; OTTHUMT00000435924; OTTHUMT00000435925; OTTHUMT00000435926; OTTHUMT00000435927; OTTHUMT00000435928; OTTHUMT00000435929; OTTHUMT00000435930; …	ACSM3	acyl-CoA synthetase medium-chain family member 3	Multiple_Complex
TC1200008726.hg.1	8,44	6,96	0,34	0,07	T	T	2,79	4,32E-05	0,0011	T	NM_001286262; NM_152772; ENST00000299045; ENST00000546625; ENST00000547153; ENST00000548428; ENST00000549906; ENST00000551228; ENST00000551802; ENST00000552690; ENST00000553098; ENST00000553143; BC033617; OTTHUMT00000407204; OTTHUMT00000407205; OTTHUMT00000407206; OTTHUMT00000407207; OTTHUMT00000407208; OTTHUMT00000407209; OTTHUMT00000407210; OTTHUMT00000407211; OTTHUMT00000407212; OTTHUMT0000040…	TCP11L2	t-complex 11, testis-specific-like 2	Multiple_Complex
TC0300008824.hg.1	13,12	12,32	0,04	0,1	T	T	1,74	4,36E-05	0,0011	T	NM_001001485; NM_001001486; NM_001001487; NM_001199179; NM_001199180; NM_001199181; NM_001199182; NM_001199183; NM_001199184; NM_001199185; NM_014382; ENST00000328560; ENST00000359644; ENST00000422190; ENST00000428331; ENST00000504381; ENST00000504571; ENST00000504612; ENST00000504948; ENST00000505072; ENST00000505330; ENST00000507194; ENST00000507488; ENST00000508297; ENST00000508532; ENST000005…	ATP2C1	ATPase, Ca++ transporting, type 2C, member 1	Multiple_Complex
TC0500008814.hg.1	12,84	13,61	0,06	0,11	T	T	-1,7	4,36E-05	0,0011	T	NM_001033112; NM_016480; NR_109830; ENST00000265192; ENST00000394795; ENST00000507415; ENST00000507755; ENST00000510080; ENST00000510409; ENST00000511381; ENST00000511706; BC001716; BC039337; BC048106; BC062718; OTTHUMT00000251320; OTTHUMT00000373002; OTTHUMT00000373003; OTTHUMT00000373004; OTTHUMT00000373005; OTTHUMT00000373006; OTTHUMT00000373007; OTTHUMT00000373008; uc003lee.3	PAIP2	poly(A) binding protein interacting protein 2	Multiple_Complex
TC0900010971.hg.1	9,29	7,61	0,43	0,25	T	T	3,2	4,37E-05	0,0011	T	NM_001267571; NM_001267572; NM_018421; NR_051978; ENST00000342112; ENST00000375063; ENST00000375064; ENST00000375066; ENST00000465784; ENST00000493589; BC028918; BC071978; OTTHUMT00000053366; OTTHUMT00000053367; OTTHUMT00000053368; OTTHUMT00000053370; OTTHUMT00000053371	TBC1D2	TBC1 domain family, member 2	Multiple_Complex
TC2200007206.hg.1	10,77	11,6	0,15	0,11	T	T	-1,78	4,46E-05	0,0012	T	NM_006739; ENST00000216122; ENST00000382011; ENST00000416905; ENST00000417343; ENST00000444778; ENST00000451351; ENST00000464908; ENST00000465557; ENST00000493076; ENST00000493569; BC000142; BC003656; OTTHUMT00000320661; OTTHUMT00000320676; OTTHUMT00000320678; OTTHUMT00000320679; OTTHUMT00000320680; OTTHUMT00000320681; OTTHUMT00000320682; OTTHUMT00000320684; OTTHUMT00000320685; OTTHUMT00000471828	MCM5	minichromosome maintenance complex component 5	Multiple_Complex
TC0X00008394.hg.1	9,15	10,29	0,19	0,24	T	T	-2,2	4,53E-05	0,0012	T	NM_001184772; NM_021946; ENST00000218147; ENST00000441294; ENST00000456822; ENST00000488135; ENST00000540052; ENST00000607874; OTTHUMT00000058223; OTTHUMT00000058224; OTTHUMT00000058225; OTTHUMT00000058226; OTTHUMT00000472572; uc022cdu.1	BCORL1	BCL6 corepressor-like 1	Multiple_Complex
TC1600011075.hg.1	11,16	12,06	0,15	0,14	T	T	-1,86	4,53E-05	0,0012	T	NM_001145548; NM_017740; ENST00000313732; ENST00000344861; ENST00000564466; ENST00000564526; ENST00000566909; ENST00000569017; ENST00000569377; ENST00000569488; BC017702; BC018772; OTTHUMT00000269087; OTTHUMT00000433848; OTTHUMT00000433849; OTTHUMT00000433850; OTTHUMT00000433851; OTTHUMT00000433852; OTTHUMT00000433853; OTTHUMT00000433854	ZDHHC7	zinc finger, DHHC-type containing 7	Multiple_Complex
TC1100009169.hg.1	13,57	12,64	0,2	0,12	T	T	1,9	4,58E-05	0,0012	T	NM_001001522; NM_003186; ENST00000278968; ENST00000392951; ENST00000525531; ENST00000529622; ENST00000529792; ENST00000530649; ENST00000532870; ENST00000533863; BC004927; BC065829; BC092415; BC093050; OTTHUMT00000392856; OTTHUMT00000392858; OTTHUMT00000392859; OTTHUMT00000392861; OTTHUMT00000392862; OTTHUMT00000392863; OTTHUMT00000392864; OTTHUMT00000392865	TAGLN	transgelin	Multiple_Complex
TC1300008497.hg.1	11,01	10,33	0,14	0,12	T	T	1,61	4,60E-05	0,0012	T	NM_007106; ENST00000380680; BC044582; BC059385; OTTHUMT00000044342	UBL3	ubiquitin-like 3	Multiple_Complex
TC0600013147.hg.1	12,68	12,02	0,03	0,05	T	T	1,58	4,63E-05	0,0012	T	NM_033515; ENST00000368149; ENST00000463225; ENST00000483367; BC101708; BC107416; BC111940; OTTHUMT00000042185; OTTHUMT00000042186; OTTHUMT00000042187	ARHGAP18	Rho GTPase activating protein 18	Multiple_Complex
TC1400006521.hg.1	12,83	13,65	0,24	0,08	T	T	-1,77	4,63E-05	0,0012	T	NM_000270; ENST00000361505; ENST00000553418; ENST00000553591; ENST00000554056; ENST00000554065; ENST00000556293; ENST00000556754; ENST00000557229; BC104206; BC104207; BC106074; OTTHUMT00000073646; OTTHUMT00000411077; OTTHUMT00000411078; OTTHUMT00000411079; OTTHUMT00000411082; OTTHUMT00000411083; OTTHUMT00000411084; OTTHUMT00000411085	PNP	purine nucleoside phosphorylase	Multiple_Complex
TC1700006638.hg.1	12,98	13,72	0,07	0,11	T	T	-1,67	4,66E-05	0,0012	T	NM_001257328; NM_001257329; NM_001257330; NM_001257331; NM_004313; NM_199004; NR_047516; ENST00000269260; ENST00000346341; ENST00000381488; ENST00000412477; ENST00000570718; ENST00000570739; ENST00000571206; ENST00000571428; ENST00000571791; ENST00000572457; ENST00000572497; ENST00000572782; ENST00000573886; ENST00000574502; ENST00000574888; ENST00000574954; ENST00000575131; ENST00000575877; ENST…	ARRB2	arrestin, beta 2	Multiple_Complex
TC0300013886.hg.1	11,56	10,86	0,16	0,15	T	T	1,63	4,67E-05	0,0012	T	NM_003412; ENST00000282928; ENST00000488404; BC104848; BC104850; OTTHUMT00000355497; OTTHUMT00000355498	ZIC1	Zic family member 1	Coding
TC0500012588.hg.1	15,28	15,95	0,05	0,03	T	T	-1,58	4,71E-05	0,0012	T	NM_001173393; NM_001308156; NM_012206; ENST00000339252; ENST00000517644; ENST00000518745; ENST00000522693; ENST00000523175; ENST00000625904; BC013325; OTTHUMT00000373592; OTTHUMT00000373697; OTTHUMT00000373698; OTTHUMT00000373699; OTTHUMT00000373700	HAVCR1	hepatitis A virus cellular receptor 1	Multiple_Complex
TC0900011120.hg.1	5,16	5,81	0,17	0,02	F	T	-1,57	4,72E-05	0,0012	F	NM_004235; ENST00000374672; ENST00000411706; ENST00000420475; ENST00000493306; ENST00000497048; ENST00000610832; BC029923; BC030811; OTTHUMT00000053555; OTTHUMT00000053556; OTTHUMT00000053557; OTTHUMT00000053558; OTTHUMT00000342675	KLF4	Kruppel-like factor 4 (gut)	Multiple_Complex
TC0300007136.hg.1	13,04	12,23	0,08	0,02	T	T	1,75	4,73E-05	0,0012	T	NM_001098209; NM_001098210; NM_001904; ENST00000349496; ENST00000396183; ENST00000396185; ENST00000405570; ENST00000426215; ENST00000431914; ENST00000433400; ENST00000441708; ENST00000450969; ENST00000453024; ENST00000465552; ENST00000471014; ENST00000482042; ENST00000485265; ENST00000488914; BC058926; OTTHUMT00000254182; OTTHUMT00000258209; OTTHUMT00000258210; OTTHUMT00000258211; OTTHUMT00000258…	CTNNB1	catenin (cadherin-associated protein), beta 1	Multiple_Complex
TC0400009543.hg.1	9,78	8,89	0,18	0,05	T	T	1,85	4,73E-05	0,0012	T	NM_003265; ENST00000296795; ENST00000504367; ENST00000508051; ENST00000512264; ENST00000513189; BC094737; BC096333; BC096334; BC096335; OTTHUMT00000360313; OTTHUMT00000360344; OTTHUMT00000360345; OTTHUMT00000360346; OTTHUMT00000360347	TLR3	toll-like receptor 3	Multiple_Complex
TC0200013861.hg.1	10,11	9,15	0,24	0,08	T	T	1,96	4,79E-05	0,0012	T	NM_005434; ENST00000272462; ENST00000424988; ENST00000427178; BC003179; OTTHUMT00000253921; OTTHUMT00000338105; OTTHUMT00000338106; uc002tfk.3	MALL	mal, T-cell differentiation protein-like	Multiple_Complex
TC0600014154.hg.1	9,99	9,13	0,17	0,14	T	T	1,82	4,81E-05	0,0012	T	NM_001168398; NM_006416; ENST00000369552; ENST00000369556; ENST00000369557; ENST00000464978; ENST00000544441; ENST00000622775; BC017807; OTTHUMT00000041446; OTTHUMT00000041447	SLC35A1	solute carrier family 35 (CMP-sialic acid transporter), member A1	Multiple_Complex
TC1200008906.hg.1	9,34	8,62	0,15	0,11	T	T	1,65	4,82E-05	0,0012	T	NM_001143906; NM_006700; ENST00000257604; ENST00000412615; ENST00000547063; ENST00000548092; ENST00000548277; ENST00000549358; ENST00000550051; ENST00000552890; ENST00000552896; BC003553; OTTHUMT00000405214; OTTHUMT00000405215; OTTHUMT00000405216; OTTHUMT00000405217; OTTHUMT00000405218; OTTHUMT00000405219; OTTHUMT00000405220; OTTHUMT00000405221	TRAFD1	TRAF-type zinc finger domain containing 1	Multiple_Complex
TC1000008063.hg.1	12,26	12,99	0,07	0,1	T	T	-1,67	4,86E-05	0,0012	T	NM_001123; NM_001202449; NM_001202450; NM_006721; ENST00000286621; ENST00000372734; ENST00000467840; ENST00000478611; ENST00000539909; ENST00000541550; BC003568; OTTHUMT00000048761; OTTHUMT00000048763; OTTHUMT00000048764; OTTHUMT00000048765; OTTHUMT00000048766	ADK; MRPL35P3	adenosine kinase; mitochondrial ribosomal protein L35 pseudogene 3	Multiple_Complex
TC1400007443.hg.1	9,87	10,72	0,09	0,12	T	T	-1,8	4,92E-05	0,0013	T	NM_021979; ENST00000247207; ENST00000394709; ENST00000554883; BC001752; BC036107; OTTHUMT00000280651; OTTHUMT00000411969	HSPA2	heat shock 70kDa protein 2	Multiple_Complex
TC1300009348.hg.1	9,34	8,4	0,22	0,03	T	T	1,92	4,94E-05	0,0013	T	NM_005842; ENST00000377102; ENST00000377104; ENST00000540649; BC004205; BC015745; OTTHUMT00000045386; OTTHUMT00000045387	SPRY2	sprouty RTK signaling antagonist 2	Coding
TC1900008989.hg.1	12,8	11,98	0,04	0,05	T	T	1,76	4,96E-05	0,0013	T	NM_006635; ENST00000360338; ENST00000537645; ENST00000599602; BC118625; OTTHUMT00000465726; OTTHUMT00000465727; OTTHUMT00000465728	ZNF460	zinc finger protein 460	Multiple_Complex
TC1700011922.hg.1	13,53	12,73	0,16	0,19	T	T	1,74	4,97E-05	0,0013	T	NM_005567; ENST00000262776; ENST00000585407; ENST00000586300; ENST00000586720; ENST00000587251; ENST00000587310; ENST00000587311; ENST00000588198; ENST00000588205; ENST00000588508; ENST00000588587; ENST00000588899; ENST00000588990; ENST00000589527; ENST00000589775; ENST00000589906; ENST00000591274; ENST00000591778; ENST00000592255; BC002403; BC002998; BC015761; OTTHUMT00000437784; OTTHUMT00000437…	LGALS3BP	lectin, galactoside-binding, soluble, 3 binding protein	Multiple_Complex
TC0100008912.hg.1	10,29	11,36	0,07	0,2	T	T	-2,09	4,99E-05	0,0013	T	NM_001554; ENST00000451137; ENST00000480413; ENST00000617517; BC001271; BC009199; BC016952; OTTHUMT00000029187; OTTHUMT00000029188	CYR61	cysteine-rich, angiogenic inducer, 61	Multiple_Complex
TC0800010685.hg.1	12,42	11,64	0,07	0,22	T	T	1,72	5,00E-05	0,0013	T	NM_001080416; NM_001144755; NM_001294282; ENST00000517885; ENST00000518079; ENST00000522419; ENST00000522677; ENST00000523304; ENST00000524176; BC101186; BC101188; OTTHUMT00000379221; OTTHUMT00000379222; OTTHUMT00000379223; OTTHUMT00000379224; OTTHUMT00000379225; OTTHUMT00000379226	MYBL1	v-myb avian myeloblastosis viral oncogene homolog-like 1	Multiple_Complex
TC0500013246.hg.1	8,71	8,03	0,09	0,24	T	T	1,6	5,01E-05	0,0013	T	NM_018930; ENST00000239446; BC031837; OTTHUMT00000251821	PCDHB10	protocadherin beta 10	Coding
TC1400009778.hg.1	10,89	11,75	0,01	0,1	T	T	-1,81	5,03E-05	0,0013	T	NM_213601; ENST00000216468; BC101510; OTTHUMT00000414100	TMED8	transmembrane p24 trafficking protein family member 8	Multiple_Complex
TC1600010341.hg.1	9,22	10,19	0,13	0,17	T	T	-1,96	5,12E-05	0,0013	T	NM_001012398; NM_001308325; NM_022476; ENST00000300245; ENST00000394657; ENST00000561799; ENST00000563108; ENST00000563928; ENST00000564497; ENST00000565408; ENST00000565431; ENST00000566045; ENST00000568022; ENST00000568596; ENST00000570004; ENST00000570041; ENST00000571523; BC001134; BC095401; OTTHUMT00000256909; OTTHUMT00000422489; OTTHUMT00000422490; OTTHUMT00000422491; OTTHUMT00000422492; OT…	AKTIP	AKT interacting protein	Multiple_Complex
TC0500009863.hg.1	8,8	7,96	0,07	0,19	T	T	1,79	5,13E-05	0,0013	T	NM_024830; ENST00000283415; ENST00000475622; ENST00000503252; ENST00000507282; ENST00000513757; ENST00000514484; OTTHUMT00000253651; OTTHUMT00000304032; OTTHUMT00000365912; OTTHUMT00000365913; OTTHUMT00000365915; OTTHUMT00000365916	LPCAT1	lysophosphatidylcholine acyltransferase 1	Multiple_Complex
TC0X00011126.hg.1	4,96	6,81	0,45	0,41	F	T	-3,61	5,14E-05	0,0013	F	NM_000808; ENST00000370314; ENST00000417858; ENST00000497894; ENST00000535043; BC028629; OTTHUMT00000060921; OTTHUMT00000060923; OTTHUMT00000060924; OTTHUMT00000472613	GABRA3	gamma-aminobutyric acid (GABA) A receptor, alpha 3	Multiple_Complex
TC1300008439.hg.1	9,37	8,57	0,07	0,11	T	T	1,74	5,17E-05	0,0013	T	NM_001166261; NM_001166262; NM_001166263; NM_152912; ENST00000381116; ENST00000381120; ENST00000405591; ENST00000460973; ENST00000461838; ENST00000464753; ENST00000471771; ENST00000483903; ENST00000484342; ENST00000485650; ENST00000485959; ENST00000493719; BC039599; BC046166; OTTHUMT00000044291; OTTHUMT00000044292; OTTHUMT00000044293; OTTHUMT00000044294; OTTHUMT00000044295; OTTHUMT00000044296; OT…	MTIF3	mitochondrial translational initiation factor 3	Multiple_Complex
TC0500011219.hg.1	11,18	11,96	0,08	0,07	T	T	-1,72	5,20E-05	0,0013	T	NM_001271769; NM_003664; ENST00000255194; ENST00000517561; ENST00000517940; ENST00000519295; ENST00000519888; ENST00000520122; ENST00000522901; ENST00000523204; BC038444; OTTHUMT00000225548; OTTHUMT00000369905; OTTHUMT00000369907; OTTHUMT00000369908; OTTHUMT00000369909; OTTHUMT00000369910; OTTHUMT00000369911; OTTHUMT00000369912	AP3B1	adaptor-related protein complex 3, beta 1 subunit	Multiple_Complex
TC0500012025.hg.1	9,11	10,03	0,1	0,21	T	T	-1,9	5,20E-05	0,0013	T	NM_001098811; NM_001098812; NM_001098813; NM_001300798; NM_001300799; NM_015146; ENST00000296873; ENST00000371478; ENST00000371493; ENST00000378699; ENST00000378701; ENST00000378706; ENST00000378719; ENST00000378721; ENST00000414594; ENST00000448933; ENST00000453480; ENST00000458488; ENST00000481030; ENST00000481794; ENST00000492490; ENST00000620483; BC140759; BC171779; OTTHUMT00000132826; OTTHUM…	2008-09-01	septin 8	Multiple_Complex
TC0500010635.hg.1	12,05	11,36	0,1	0,11	T	T	1,62	5,21E-05	0,0013	T	NM_001098272; NM_002130; ENST00000325110; ENST00000433297; ENST00000507004; ENST00000507293; ENST00000508319; ENST00000511774; ENST00000514610; BC083514; OTTHUMT00000368022; OTTHUMT00000368024; OTTHUMT00000368025; OTTHUMT00000368026; OTTHUMT00000368027; OTTHUMT00000368028; OTTHUMT00000368029	HMGCS1	3-hydroxy-3-methylglutaryl-CoA synthase 1 (soluble)	Multiple_Complex
TC0800012087.hg.1	9,18	7,81	0,19	0,31	T	T	2,58	5,24E-05	0,0013	T	NM_023946; NM_177457; NM_177458; NM_177476; NM_177477; ENST00000317543; ENST00000521396; ENST00000522906; ENST00000523332; ENST00000613110; ENST00000614268; ENST00000614491; ENST00000615007; ENST00000620006; ENST00000621401; OTTHUMT00000379785; OTTHUMT00000379786; OTTHUMT00000379787; OTTHUMT00000379887; OTTHUMT00000379888; OTTHUMT00000379889; OTTHUMT00000379890; OTTHUMT00000379891; OTTHUMT0000037…	LYNX1	Ly6/neurotoxin 1	Multiple_Complex
TC1200010902.hg.1	9,07	7,99	0,08	0,47	T	T	2,12	5,25E-05	0,0013	T	NM_173595; ENST00000267116; ENST00000548081; ENST00000548241; ENST00000551023; OTTHUMT00000408538; OTTHUMT00000408539; OTTHUMT00000408542; OTTHUMT00000408543	ANKRD52	ankyrin repeat domain 52	Multiple_Complex
TC0200009756.hg.1	10,52	11,26	0,15	0,1	T	T	-1,67	5,31E-05	0,0013	T	NM_001005476; NM_001304969; NM_001304970; NM_001304971; NM_003628; ENST00000389757; ENST00000389759; ENST00000411900; ENST00000421462; ENST00000426248; ENST00000452162; ENST00000457109; ENST00000462335; ENST00000479398; ENST00000480171; ENST00000481115; ENST00000483881; ENST00000486254; ENST00000492496; ENST00000494945; ENST00000495123; ENST00000628904; ENST00000629219; BC050308; OTTHUMT000003332…	PKP4	plakophilin 4	Multiple_Complex
TC0100010111.hg.1	7,59	6,39	0,24	0,07	T	T	2,3	5,33E-05	0,0013	T	NM_004428; NM_182685; ENST00000368406; ENST00000368407; ENST00000469878; ENST00000474413; ENST00000497282; BC032698; BC095432; OTTHUMT00000085428; OTTHUMT00000085485; OTTHUMT00000085486; OTTHUMT00000085487; OTTHUMT00000085488	EFNA1	ephrin-A1	Multiple_Complex
TC2200007906.hg.1	11,03	11,65	0,16	0,05	T	T	-1,54	5,33E-05	0,0013	T	NM_001196; NM_001244567; NM_001244569; NM_001244570; NM_001244572; NM_197966; NM_197967; ENST00000317361; ENST00000342111; ENST00000399765; ENST00000399767; ENST00000399774; ENST00000473439; ENST00000494097; ENST00000550946; ENST00000551952; ENST00000552886; ENST00000611040; ENST00000614949; ENST00000615414; ENST00000617586; ENST00000622694; BC009197; BC033634; BC036364	BID	BH3 interacting domain death agonist	Multiple_Complex
TC0200016775.hg.1	12,31	11,6	0,07	0,08	T	T	1,63	5,34E-05	0,0013	T	NM_001077198; NM_024085; NR_104255; ENST00000361242; ENST00000396761; ENST00000409033; ENST00000409422; ENST00000409618; ENST00000412355; ENST00000428226; ENST00000429920; ENST00000431715; ENST00000432520; ENST00000434939; ENST00000436856; ENST00000439812; ENST00000443140; ENST00000455079; ENST00000456708; ENST00000457841; ENST00000466217; ENST00000475339; ENST00000486766; ENST00000488833; BC0655…	ATG9A	autophagy related 9A	Multiple_Complex
TC0200012072.hg.1	12,19	12,83	0,06	0,06	T	T	-1,56	5,36E-05	0,0013	T	NM_002437; ENST00000233545; ENST00000357186; ENST00000380044; ENST00000399052; ENST00000402310; ENST00000402722; ENST00000403262; ENST00000405076; ENST00000405983; ENST00000415514; ENST00000426513; ENST00000428910; ENST00000430991; ENST00000475085; ENST00000486898; ENST00000494436; ENST00000616446; ENST00000616707; ENST00000617583; ENST00000620797; ENST00000621183; ENST00000621470; ENST0000062200…	MPV17	MpV17 mitochondrial inner membrane protein	Multiple_Complex
TC1600010168.hg.1	12,9	13,76	0,2	0,13	T	T	-1,81	5,37E-05	0,0013	T	NM_024745; ENST00000303383; ENST00000563219; ENST00000564272; ENST00000565887; ENST00000566016; ENST00000567698; ENST00000569702; BC030699; OTTHUMT00000255740; OTTHUMT00000430581; OTTHUMT00000430582; OTTHUMT00000430583; OTTHUMT00000430584; OTTHUMT00000430585; OTTHUMT00000430586	SHCBP1	SHC SH2-domain binding protein 1	Multiple_Complex
TC1900011741.hg.1	7,58	6,53	0,21	0,33	T	T	2,07	5,39E-05	0,0013	T	NM_001291484; NM_001308398; NM_004363; ENST00000221992; ENST00000398599; ENST00000405816; ENST00000460121; ENST00000595113; ENST00000595403; ENST00000596606; ENST00000615021; ENST00000616453; ENST00000617332; BC034671; OTTHUMT00000321132; OTTHUMT00000321133; OTTHUMT00000321134; OTTHUMT00000321135; OTTHUMT00000462831; OTTHUMT00000462832; OTTHUMT00000462833	CEACAM5	carcinoembryonic antigen-related cell adhesion molecule 5	Multiple_Complex
TC0400010770.hg.1	12,92	13,61	0,05	0,17	T	T	-1,61	5,40E-05	0,0013	T	NM_002703; ENST00000264220; ENST00000425339; ENST00000507648; ENST00000507724; ENST00000510643; BC004200; OTTHUMT00000250781; OTTHUMT00000362437; OTTHUMT00000362438; OTTHUMT00000362439; OTTHUMT00000362440	PPAT	phosphoribosyl pyrophosphate amidotransferase	Multiple_Complex
TC0600012314.hg.1	6,7	5,51	0,1	0,3	T	T	2,29	5,42E-05	0,0013	T	NM_004370; NM_080645; ENST00000322507; ENST00000345356; ENST00000416123; ENST00000419671; ENST00000425443; ENST00000474564; ENST00000483888; ENST00000486533; ENST00000493109; ENST00000511023; ENST00000615798; BC146868; OTTHUMT00000041249; OTTHUMT00000041250; OTTHUMT00000041251; OTTHUMT00000041252; OTTHUMT00000041253; OTTHUMT00000041254; OTTHUMT00000041255; OTTHUMT00000041256; OTTHUMT00000363218; …	COL12A1	collagen, type XII, alpha 1	Multiple_Complex
TC2200008482.hg.1	10,07	11,05	0,19	0,16	T	T	-1,98	5,44E-05	0,0013	T	NM_001164501; NM_001164502; NM_019843; ENST00000330125; ENST00000344710; ENST00000397518; ENST00000397520; ENST00000397523; ENST00000397525; ENST00000418321; ENST00000423097; ENST00000441289; ENST00000445424; ENST00000475437; ENST00000487671; ENST00000495101; BC032941; BC033028; OTTHUMT00000075681; OTTHUMT00000127925; OTTHUMT00000127926; OTTHUMT00000127927; OTTHUMT00000127928; OTTHUMT00000127929;…	EIF4ENIF1	eukaryotic translation initiation factor 4E nuclear import factor 1	Multiple_Complex
TC1200006996.hg.1	7,94	8,81	0,2	0,11	T	T	-1,84	5,45E-05	0,0014	T	NM_001288772; NM_001288774; NM_004570; ENST00000266497; ENST00000433979; ENST00000535651; ENST00000536967; ENST00000538458; ENST00000538779; ENST00000546003; BC130277; BC144134; OTTHUMT00000401314; OTTHUMT00000401315; OTTHUMT00000401316; OTTHUMT00000401317; OTTHUMT00000401318	PIK3C2G	phosphatidylinositol-4-phosphate 3-kinase, catalytic subunit type 2 gamma	Multiple_Complex
TC2200007114.hg.1	13,8	14,43	0,06	0,04	T	T	-1,55	5,48E-05	0,0014	T	NM_003405; ENST00000248975; ENST00000397492; ENST00000420430; ENST00000443669; ENST00000471374; ENST00000479649; BC003047; OTTHUMT00000075721; OTTHUMT00000128919; OTTHUMT00000128920; OTTHUMT00000128921; OTTHUMT00000128922; OTTHUMT00000319307	YWHAH	tyrosine 3-monooxygenase/tryptophan 5-monooxygenase activation protein, eta	Multiple_Complex
TC1500007238.hg.1	6,61	7,63	0,25	0,22	T	T	-2,02	5,50E-05	0,0014	T	NM_001142885; NM_014548; ENST00000249700; ENST00000435126; ENST00000539962; ENST00000560576; ENST00000561300; ENST00000561407; BC036184; BC064961; OTTHUMT00000254742; OTTHUMT00000419220; OTTHUMT00000419221; OTTHUMT00000419222; OTTHUMT00000419223; OTTHUMT00000419224	TMOD2	tropomodulin 2 (neuronal)	Multiple_Complex
TC0200006687.hg.1	9,35	10,49	0,06	0,08	T	T	-2,19	5,57E-05	0,0014	T	NM_001258357; NM_001258358; NM_001258359; NM_002149; NM_134421; ENST00000307845; ENST00000381765; ENST00000419810; ENST00000422133; ENST00000423674; ENST00000613496; ENST00000620771; ENST00000622018; BC009846; BC017028; BC017482; OTTHUMT00000206897; OTTHUMT00000206898; OTTHUMT00000323534; OTTHUMT00000323535; OTTHUMT00000323536; uc002ral.3	HPCAL1	hippocalcin-like 1	Multiple_Complex
TC0500009076.hg.1	10,33	9,39	0,13	0,08	T	T	1,91	5,57E-05	0,0014	T	NM_000112; ENST00000286298; ENST00000433184; ENST00000503336; BC059390; OTTHUMT00000252333; OTTHUMT00000335323; OTTHUMT00000373768	SLC26A2	solute carrier family 26 (anion exchanger), member 2	Multiple_Complex
TC1100011833.hg.1	9,66	8,6	0,08	0,3	T	T	2,08	5,56E-05	0,0014	T	NM_001162951; NM_001162952; NM_001162953; NM_001289608; NM_001289609; NM_001289610; NM_032943; NM_206929; NM_206930; ENST00000316356; ENST00000354566; ENST00000359152; ENST00000389958; ENST00000389959; ENST00000389960; ENST00000438197; ENST00000524452; ENST00000524830; ENST00000524911; ENST00000525423; ENST00000525692; ENST00000525702; ENST00000526999; ENST00000527523; ENST00000527794; ENST000005…	SYTL2	synaptotagmin-like 2	Multiple_Complex
TC1100012303.hg.1	11,67	12,42	0,12	0,14	T	T	-1,69	5,60E-05	0,0014	T	NM_001177562; NM_001177563; NM_002716; NM_181699; NM_181700; ENST00000311129; ENST00000341980; ENST00000393055; ENST00000426998; ENST00000526287; ENST00000527614; ENST00000529672; ENST00000530787; ENST00000531373; ENST00000531890; ENST00000534500; ENST00000534521; BC027596; OTTHUMT00000391296; OTTHUMT00000391297; OTTHUMT00000391298; OTTHUMT00000391299; OTTHUMT00000391300; OTTHUMT00000391301; OTTH…	PPP2R1B	protein phosphatase 2, regulatory subunit A, beta	Multiple_Complex
TC1300007794.hg.1	13,02	12,35	0,1	0,06	T	T	1,6	5,61E-05	0,0014	T	NM_001001715; NM_001286839; NM_005766; NR_036129; ENST00000319562; ENST00000376581; ENST00000423063; ENST00000427404; ENST00000457029; ENST00000457431; ENST00000490389; ENST00000582699; ENST00000593548; ENST00000593990; ENST00000594346; ENST00000594657; ENST00000595366; ENST00000595380; ENST00000595437; ENST00000595817; ENST00000596256; ENST00000596467; ENST00000596545; ENST00000596580; ENST00000…	FARP1; MIR3170	FERM, ARH/RhoGEF and pleckstrin domain protein 1; microRNA 3170	Multiple_Complex
TC0100012055.hg.1	11,36	10,59	0,18	0,15	T	T	1,71	5,64E-05	0,0014	T	NM_001037277; NR_036605; ENST00000282841; ENST00000358966; ENST00000391855; ENST00000471812; ENST00000482013; ENST00000488594; ENST00000489692; ENST00000497327; BC005252; BC067768; OTTHUMT00000092656; OTTHUMT00000356796; OTTHUMT00000356797; OTTHUMT00000356799; OTTHUMT00000356800; OTTHUMT00000356801; OTTHUMT00000356802	GGPS1	geranylgeranyl diphosphate synthase 1	Multiple_Complex
TC0700012299.hg.1	6,65	7,63	0,25	0,11	T	T	-1,98	5,64E-05	0,0014	T	NM_001146265; NM_001146266; NM_001146267; NM_018970; ENST00000297146; ENST00000424100; ENST00000438062; ENST00000449591; ENST00000449735; ENST00000487573; ENST00000610164; BC030577	GPR85	G protein-coupled receptor 85	Multiple_Complex
TC1100009707.hg.1	10,59	11,33	0,11	0,21	T	T	-1,68	5,66E-05	0,0014	T	NM_021128; ENST00000322028; ENST00000534030; BC005903; BC018649; OTTHUMT00000257114; OTTHUMT00000384558	POLR2L	polymerase (RNA) II (DNA directed) polypeptide L, 7.6kDa	Coding
TC1100010261.hg.1	9,89	10,87	0,12	0,16	T	T	-1,97	5,66E-05	0,0014	T	NM_007216; NM_181507; NM_181508; ENST00000349215; ENST00000352460; ENST00000396253; ENST00000399287; ENST00000438420; ENST00000531848; ENST00000537258; ENST00000543728; ENST00000544218; ENST00000545561; ENST00000589545; BC033640; OTTHUMT00000390807; OTTHUMT00000390808; OTTHUMT00000390809; OTTHUMT00000395865; OTTHUMT00000395866; OTTHUMT00000395867; OTTHUMT00000395868; OTTHUMT00000395869; OTTHUMT00…	HPS5	Hermansky-Pudlak syndrome 5	Multiple_Complex
TC1600010680.hg.1	9,29	10,25	0,21	0,14	T	T	-1,94	5,69E-05	0,0014	T	NM_032178; ENST00000263997; ENST00000561590; ENST00000561933; ENST00000568315; ENST00000568538; ENST00000619380; BC013778; OTTHUMT00000268894; OTTHUMT00000432011; OTTHUMT00000432012; OTTHUMT00000432013; OTTHUMT00000433111	SLC7A6OS	solute carrier family 7, member 6 opposite strand	Multiple_Complex
TC0800008916.hg.1	12,77	11,99	0,18	0,12	T	T	1,73	5,71E-05	0,0014	T	NM_015137; ENST00000254624; ENST00000519656; ENST00000519920; ENST00000520362; ENST00000521940; ENST00000522709; ENST00000523074; BC152442; OTTHUMT00000318886; OTTHUMT00000380048; OTTHUMT00000380049; OTTHUMT00000380050; OTTHUMT00000380051; OTTHUMT00000380052; OTTHUMT00000380053	EFR3A	EFR3 homolog A	Multiple_Complex
TC0100016649.hg.1	5,37	6,52	0,33	0,18	T	T	-2,21	5,73E-05	0,0014	T	NM_015039; NM_170706; ENST00000287713; ENST00000294868; ENST00000464047; ENST00000473046; BC020998; OTTHUMT00000086255; OTTHUMT00000086256; OTTHUMT00000086257; OTTHUMT00000098589; uc001gqb.2	NMNAT2	nicotinamide nucleotide adenylyltransferase 2	Multiple_Complex
TC0300014055.hg.1	11	11,85	0,11	0,2	T	T	-1,81	5,77E-05	0,0014	T	ENST00000461451; ENST00000465581; ENST00000483968; OTTHUMT00000358021; OTTHUMT00000358025; OTTHUMT00000358026	PIK3CB	phosphatidylinositol-4,5-bisphosphate 3-kinase, catalytic subunit beta	Coding
TC0500008883.hg.1	11,39	10,77	0,06	0,09	T	T	1,54	5,77E-05	0,0014	T	NM_018932; ENST00000239450; ENST00000622978; ENST00000624949; BC045637; OTTHUMT00000251815; OTTHUMT00000478895; OTTHUMT00000478896	PCDHB12	protocadherin beta 12	Coding
TC2000008310.hg.1	12,8	13,45	0,06	0,21	T	T	-1,56	5,87E-05	0,0014	T	NM_001281467; NM_015939; ENST00000203001; ENST00000453074; ENST00000466974; ENST00000473131; ENST00000493972; BC001262; OTTHUMT00000077889; OTTHUMT00000077890; OTTHUMT00000077891; OTTHUMT00000077892	TRMT6	tRNA methyltransferase 6	Multiple_Complex
TC0100017834.hg.1	7,69	8,45	0,06	0,04	T	T	-1,69	5,99E-05	0,0015	T	NM_001098721; NM_001098722; NM_004485; ENST00000366597; ENST00000366598; ENST00000391854; ENST00000450593; ENST00000484517; BC022485; OTTHUMT00000097906; OTTHUMT00000097907; OTTHUMT00000097908	GNG4	guanine nucleotide binding protein (G protein), gamma 4	Multiple_Complex
TC0600007108.hg.1	9,46	10,28	0,11	0,09	T	T	-1,76	6,00E-05	0,0015	T	NM_182757; ENST00000259939; ENST00000486622; BC063311; OTTHUMT00000039965; OTTHUMT00000039966; uc003ncs.3	RNF144B	ring finger protein 144B	Multiple_Complex
TC0400012551.hg.1	10,54	9,71	0,18	0,06	T	T	1,78	6,03E-05	0,0015	T	NM_001012732; NM_001921; ENST00000357067; ENST00000438320; ENST00000500813; ENST00000503182; ENST00000503820; ENST00000503988; ENST00000507543; ENST00000507631; ENST00000508994; ENST00000509218; ENST00000509757; ENST00000510307; ENST00000510370; ENST00000512766; ENST00000513348; ENST00000513383; ENST00000514754; BC001286; BC088357; OTTHUMT00000361742; OTTHUMT00000361743; OTTHUMT00000361868; OTTHU…	DCTD	dCMP deaminase	Multiple_Complex
TC1600010490.hg.1	12,62	13,36	0,05	0,11	T	T	-1,67	6,08E-05	0,0015	T	NM_001265612; NM_016284; NM_206999; NR_002980; NR_049763; ENST00000245138; ENST00000317147; ENST00000441024; ENST00000562046; ENST00000563130; ENST00000563283; ENST00000564557; ENST00000565605; ENST00000565697; ENST00000566240; ENST00000567133; ENST00000567188; ENST00000567285; ENST00000568158; ENST00000568917; ENST00000569020; ENST00000569240; ENST00000569263; ENST00000569732; ENST00000569882; E…	CNOT1; SNORA50A	CCR4-NOT transcription complex subunit 1; small nucleolar RNA, H/ACA box 50A	Multiple_Complex
TC0700013361.hg.1	7,78	6,93	0,02	0,25	T	T	1,8	6,11E-05	0,0015	T	NM_182633; ENST00000411863; ENST00000429591; ENST00000466630; ENST00000482436; ENST00000484120; ENST00000633730; OTTHUMT00000343297; OTTHUMT00000343298; OTTHUMT00000343299; OTTHUMT00000343301; OTTHUMT00000343302	ZNF713	zinc finger protein 713	Multiple_Complex
TC0100009054.hg.1	12,97	13,67	0,08	0,05	T	T	-1,63	6,13E-05	0,0015	T	NM_001164391; NM_001164392; NM_001164393; NM_007358; ENST00000370298; ENST00000370303; ENST00000467953; ENST00000468457; ENST00000471953; ENST00000473430; ENST00000474314; ENST00000476037; ENST00000487263; ENST00000489480; ENST00000494963; ENST00000497976; ENST00000540243; ENST00000545708; BC010013; OTTHUMT00000028075; OTTHUMT00000029526; OTTHUMT00000029527; OTTHUMT00000029528; OTTHUMT00000089730…	MTF2	metal response element binding transcription factor 2	Multiple_Complex
TC0300008148.hg.1	8,64	7,63	0,17	0,14	T	T	2,01	6,18E-05	0,0015	T	NM_018004; ENST00000323523; ENST00000403410; ENST00000449609; ENST00000462884; ENST00000485260; ENST00000488904; ENST00000489060; BC040355; OTTHUMT00000317571; OTTHUMT00000317572; OTTHUMT00000317573; OTTHUMT00000317574; OTTHUMT00000317575; OTTHUMT00000317576; OTTHUMT00000317577	TMEM45A	transmembrane protein 45A	Multiple_Complex
TC0300011834.hg.1	13,68	12,97	0,1	0,12	T	T	1,63	6,18E-05	0,0015	T	NM_001042459; NM_001282793; NM_001282794; NM_014890; NM_182909; ENST00000331335; ENST00000354552; ENST00000383694; ENST00000398326; ENST00000468533; ENST00000471562; ENST00000476723; ENST00000477258; ENST00000487087; ENST00000495625; BC027860; OTTHUMT00000353069; OTTHUMT00000353070; OTTHUMT00000353071; OTTHUMT00000353072; OTTHUMT00000353074; OTTHUMT00000353075; OTTHUMT00000353076; OTTHUMT00000353…	FILIP1L	filamin A interacting protein 1-like	Multiple_Complex
TC0400012990.hg.1	9,45	8,65	0,04	0,02	T	T	1,73	6,19E-05	0,0015	T	NM_001012967; NM_001291510; ENST00000260184; ENST00000503190; ENST00000504793; ENST00000505696; ENST00000505863; ENST00000505890; ENST00000510590; ENST00000511577; ENST00000512371; ENST00000513103; ENST00000513901; ENST00000514580; ENST00000514748; ENST00000515088; OTTHUMT00000364839; OTTHUMT00000364840; OTTHUMT00000364841; OTTHUMT00000364842; OTTHUMT00000364843; OTTHUMT00000364844; OTTHUMT000003…	DDX60L	DEAD (Asp-Glu-Ala-Asp) box polypeptide 60-like	Multiple_Complex
TC1400007321.hg.1	7,24	5,77	0,49	0,31	T	F	2,76	6,20E-05	0,0015	F	DACT1.fAug10-unspliced	DACT1	Transcript Identified by AceView, Entrez Gene ID(s) 51339	Unassigned
TC1900008699.hg.1	11,24	10,46	0,12	0,25	T	T	1,72	6,21E-05	0,0015	T	NM_032423; ENST00000360465; ENST00000391787; ENST00000391788; ENST00000436397; ENST00000448954; ENST00000479718; ENST00000493272; ENST00000494167; ENST00000531472; ENST00000594530; ENST00000598192; ENST00000598479; BC101712; BC111950; OTTHUMT00000344336; OTTHUMT00000344337; OTTHUMT00000344338; OTTHUMT00000344339; OTTHUMT00000344340; OTTHUMT00000344341; OTTHUMT00000344342; OTTHUMT00000384449; OTTH…	ZNF528	zinc finger protein 528	Multiple_Complex
TC0100014531.hg.1	11,91	11,1	0,03	0,03	T	T	1,75	6,23E-05	0,0015	T	NM_001002292; NM_001193334; NM_024911; ENST00000262348; ENST00000354777; ENST00000370971; ENST00000370973; ENST00000370976; ENST00000471243; ENST00000491076; ENST00000491811; ENST00000497187; ENST00000498615; ENST00000527864; ENST00000530486; ENST00000533537; ENST00000534713; BC110826; BC137109; BC137113; OTTHUMT00000025368; OTTHUMT00000025369; OTTHUMT00000025370; OTTHUMT00000025371; OTTHUMT00000…	WLS	wntless Wnt ligand secretion mediator	Multiple_Complex
TC0600009406.hg.1	5,98	4,94	0,18	0,23	T	F	2,06	6,24E-05	0,0015	F	NM_001010905; ENST00000329722; ENST00000498112; BC062712; OTTHUMT00000042151; OTTHUMT00000042152	C6orf58	chromosome 6 open reading frame 58	Multiple_Complex
TC0200015225.hg.1	10,49	11,28	0,1	0,12	T	T	-1,72	6,26E-05	0,0015	T	NM_014362; NM_198047; ENST00000359678; ENST00000392332; ENST00000392333; ENST00000399855; ENST00000409820; ENST00000409934; ENST00000410045; ENST00000414928; ENST00000416732; ENST00000485992; ENST00000486981; ENST00000489147; ENST00000489269; ENST00000495792; ENST00000622246; BC067822; OTTHUMT00000255933; OTTHUMT00000334937; OTTHUMT00000334938; OTTHUMT00000334939; OTTHUMT00000334940; OTTHUMT00000…	HIBCH	3-hydroxyisobutyryl-CoA hydrolase	Multiple_Complex
TC1200012714.hg.1	7,59	5,88	0,23	0,67	T	F	3,26	6,26E-05	0,0015	F	NM_014365; ENST00000281938; ENST00000542496; BC002673; OTTHUMT00000401647; OTTHUMT00000401649	HSPB8	heat shock 22kDa protein 8	Multiple_Complex
TC1200012819.hg.1	10,72	10,05	0,04	0,08	T	T	1,59	6,31E-05	0,0015	T	NM_001282606; NM_001282609; NM_001282610; NM_016056; ENST00000286424; ENST00000358230; ENST00000398033; ENST00000534930; ENST00000535812; ENST00000538217; ENST00000542072; ENST00000542724; ENST00000544599; ENST00000545407; ENST00000545504; ENST00000556010; ENST00000613669; ENST00000632269; ENST00000632662; ENST00000633367; OTTHUMT00000401831; OTTHUMT00000401832; OTTHUMT00000401833; OTTHUMT0000040…	TMBIM4	transmembrane BAX inhibitor motif containing 4	Multiple_Complex
TC0400007799.hg.1	6,03	6,88	0,21	0,18	T	T	-1,8	6,35E-05	0,0015	T	NM_001098484; NM_001134742; NM_003759; ENST00000264485; ENST00000340595; ENST00000351898; ENST00000425175; ENST00000512686; ENST00000514331; BC030977; OTTHUMT00000252158; OTTHUMT00000362090; OTTHUMT00000362091; OTTHUMT00000362107; OTTHUMT00000362108; uc003hgc.4; uc010iic.3	SLC4A4	solute carrier family 4 (sodium bicarbonate cotransporter), member 4	Multiple_Complex
TC0400012922.hg.1	11,84	11	0,02	0,11	T	T	1,79	6,36E-05	0,0015	T	NM_006068; ENST00000381950; ENST00000436693; ENST00000508254; ENST00000514655; ENST00000610323; BC111755; OTTHUMT00000250431; OTTHUMT00000360559; OTTHUMT00000360560	TLR6	toll-like receptor 6	Multiple_Complex
TC0500013064.hg.1	9,03	8,23	0,1	0,16	T	T	1,75	6,37E-05	0,0015	T	NM_014275; NM_054013; ENST00000292591; ENST00000337755; ENST00000518168; ENST00000518702; ENST00000518778; ENST00000518867; ENST00000518980; ENST00000519616; ENST00000519836; ENST00000519965; ENST00000520019; ENST00000520134; ENST00000520822; ENST00000520875; ENST00000520918; ENST00000520969; ENST00000521305; ENST00000521855; ENST00000522293; ENST00000522451; ENST00000523108; ENST00000523329; ENS…	MGAT4B	mannosyl (alpha-1,3-)-glycoprotein beta-1,4-N-acetylglucosaminyltransferase, isozyme B	Multiple_Complex
TC0500008539.hg.1	12,11	11,43	0,07	0,19	T	T	1,6	6,38E-05	0,0015	T	NM_001146319; NM_001146320; NM_001146321; NM_001146322; NM_023927; ENST00000285689; ENST00000502348; ENST00000503702; ENST00000504859; ENST00000505441; ENST00000505720; ENST00000506445; ENST00000508523; ENST00000509882; ENST00000511134; ENST00000512579; ENST00000513040; ENST00000513913; ENST00000513978; ENST00000514099; ENST00000514932; ENST00000515200; ENST00000542322; ENST00000544396; BC008590;…	GRAMD3	GRAM domain containing 3	Multiple_Complex
TC0900008865.hg.1	9,25	8,51	0,12	0,03	T	T	1,67	6,44E-05	0,0015	T	NM_001286760; NM_016174; ENST00000372838; ENST00000372842; ENST00000411852; ENST00000420034; ENST00000420512; ENST00000447915; ENST00000463535; ENST00000472858; ENST00000483737; ENST00000483893; ENST00000487001; ENST00000493788; ENST00000612334; ENST00000613052; BC098432; BC119698; BC119699; OTTHUMT00000054434; OTTHUMT00000054435; OTTHUMT00000054436; OTTHUMT00000054437; OTTHUMT00000054438; OTTHUM…	CERCAM	cerebral endothelial cell adhesion molecule	Multiple_Complex
TC1700007811.hg.1	9,64	10,48	0,11	0,16	T	T	-1,8	6,46E-05	0,0015	T	NM_001195386; NM_001195387; NM_145274; ENST00000301665; ENST00000436612; ENST00000496847; ENST00000622451; BC015365; OTTHUMT00000257681; OTTHUMT00000257682; OTTHUMT00000257683; uc021txd.1	TMEM99	transmembrane protein 99	Multiple_Complex
TC0800012433.hg.1	12,61	13,3	0,12	0,08	T	T	-1,61	6,48E-05	0,0015	T	NM_001025252; NM_001025253; NM_001287140; NM_001287142; NM_001287143; NM_001287144; NM_005079; NR_105033; NR_105034; NR_105035; NR_105036; NR_105037; ENST00000379096; ENST00000379097; ENST00000448733; ENST00000517427; ENST00000517445; ENST00000517462; ENST00000518500; ENST00000518517; ENST00000518937; ENST00000519303; ENST00000520527; ENST00000520741; ENST00000520795; ENST00000520877; ENST0000052…	TPD52	tumor protein D52	Multiple_Complex
TC1100011286.hg.1	8,02	7,07	0,36	0,14	T	T	1,94	6,51E-05	0,0015	T	NM_001300868; NM_001300869; NM_001532; NR_125343; ENST00000311161; ENST00000357440; ENST00000540386; ENST00000541567; ENST00000544554; ENST00000546034; ENST00000619145; BC011387; BC093634; OTTHUMT00000402092; OTTHUMT00000402093; OTTHUMT00000402094; OTTHUMT00000402095; OTTHUMT00000402096; OTTHUMT00000402097	SLC29A2	solute carrier family 29 (equilibrative nucleoside transporter), member 2	Multiple_Complex
TC1200011755.hg.1	11,08	10,29	0,14	0,17	T	T	1,73	6,63E-05	0,0016	T	NM_006166; ENST00000240055; ENST00000550189; ENST00000550881; ENST00000551446; ENST00000551727; BC005316; BC005317; BC007035; OTTHUMT00000407786; OTTHUMT00000407787; OTTHUMT00000407788; OTTHUMT00000407789; OTTHUMT00000407790	NFYB	nuclear transcription factor Y subunit beta	Multiple_Complex
TC1200012327.hg.1	10,56	9,86	0,06	0,11	T	T	1,62	6,65E-05	0,0016	T	NM_001082959; NM_005505; ENST00000261693; ENST00000339570; ENST00000415380; ENST00000535005; ENST00000538291; ENST00000539320; ENST00000541661; ENST00000544327; ENST00000545305; ENST00000545493; ENST00000546215; BC080647; BC093732; BC112037; BC143319; OTTHUMT00000400164; OTTHUMT00000400165; OTTHUMT00000400166; OTTHUMT00000400168; OTTHUMT00000400169; OTTHUMT00000400170; OTTHUMT00000400171; OTTHUMT…	SCARB1	scavenger receptor class B, member 1	Multiple_Complex
TC1100013075.hg.1	9,28	10	0,12	0,09	T	T	-1,65	6,67E-05	0,0016	T	NM_145018; ENST00000329143; ENST00000524921; ENST00000525388; ENST00000528189; ENST00000528262; ENST00000528759; ENST00000532277; ENST00000532589; ENST00000532764; ENST00000533655; ENST00000533750; BC039268; OTTHUMT00000391932; OTTHUMT00000391933; OTTHUMT00000391934; OTTHUMT00000391936; OTTHUMT00000391937; OTTHUMT00000391938; OTTHUMT00000391939; OTTHUMT00000391940; OTTHUMT00000391941; OTTHUMT0000…	DDIAS	DNA damage-induced apoptosis suppressor	Multiple_Complex
TC1000011381.hg.1	6,93	7,56	0,18	0,04	T	T	-1,55	6,69E-05	0,0016	T	NM_213606; ENST00000371790; ENST00000475682; OTTHUMT00000049304; OTTHUMT00000049316	SLC16A12	solute carrier family 16, member 12	Multiple_Complex
TC0700010561.hg.1	6,04	5,09	0,04	0,33	T	F	1,94	6,71E-05	0,0016	F	NM_019102; ENST00000222726; ENST00000520854; BC013682; OTTHUMT00000134420; OTTHUMT00000358705; uc003syn.2	HOXA5	homeobox A5	Multiple_Complex
TC0200009091.hg.1	11,19	11,85	0,08	0,13	T	T	-1,59	6,80E-05	0,0016	T	NM_002881; ENST00000272519; ENST00000412383; ENST00000420510; ENST00000431732; ENST00000447591; ENST00000449649; ENST00000470417; ENST00000631312; BC018163; OTTHUMT00000254232; OTTHUMT00000332358; OTTHUMT00000332359; OTTHUMT00000332362; OTTHUMT00000338460; OTTHUMT00000338461; OTTHUMT00000338462	RALB	v-ral simian leukemia viral oncogene homolog B	Multiple_Complex
TC1200011711.hg.1	10,58	9,9	0,12	0,16	T	T	1,61	6,82E-05	0,0016	T	NM_024312; ENST00000299314; ENST00000392919; ENST00000549165; ENST00000549194; ENST00000549738; ENST00000549940; ENST00000550352; ENST00000550718; ENST00000552009; ENST00000552681; BC131787; OTTHUMT00000409182; OTTHUMT00000409183; OTTHUMT00000409184; OTTHUMT00000409185; OTTHUMT00000409186; OTTHUMT00000409187; OTTHUMT00000409188; OTTHUMT00000409189; OTTHUMT00000409191; OTTHUMT00000409192	GNPTAB	N-acetylglucosamine-1-phosphate transferase, alpha and beta subunits	Multiple_Complex
TC2000009965.hg.1	13,23	13,88	0,05	0,05	T	T	-1,57	6,82E-05	0,0016	T	NM_000801; NM_001199786; NM_054014; NR_106929; ENST00000381715; ENST00000381719; ENST00000381724; ENST00000400137; ENST00000439640; ENST00000460490; ENST00000474657; ENST00000474726; ENST00000612074; ENST00000614856; ENST00000618612; ENST00000619434; BC001925; BC005147; BC119732; OTTHUMT00000077534; OTTHUMT00000077535; OTTHUMT00000077536; OTTHUMT00000077537; OTTHUMT00000077538; OTTHUMT00000077539…	FKBP1A; MIR6869	FK506 binding protein 1A; microRNA 6869	Multiple_Complex
TC1600010864.hg.1	8,59	9,38	0,2	0,03	T	T	-1,72	6,84E-05	0,0016	T	NM_030581; ENST00000262144; ENST00000536050; ENST00000561717; ENST00000562331; ENST00000562371; ENST00000562539; ENST00000562854; ENST00000563111; ENST00000563381; ENST00000563797; ENST00000564859; ENST00000566924; ENST00000567018; ENST00000568323; ENST00000568462; ENST00000569183; ENST00000569229; ENST00000569421; ENST00000569549; ENST00000569788; ENST00000569968; ENST00000570070; ENST0000061636…	WDR59	WD repeat domain 59	Multiple_Complex
TC0600008972.hg.1	6,73	5,47	0,34	0,27	T	F	2,4	6,86E-05	0,0016	F	NM_001198; NM_182907; ENST00000369089; ENST00000369091; ENST00000369096; ENST00000424894; ENST00000450060; ENST00000481163; ENST00000489365; ENST00000613999; BC103832; BC103833; BC103834; BC103835; OTTHUMT00000041661; OTTHUMT00000041662; OTTHUMT00000041663; OTTHUMT00000327265; OTTHUMT00000327266; OTTHUMT00000327267; OTTHUMT00000327268	PRDM1	PR domain containing 1, with ZNF domain	Multiple_Complex
TSUnmapped00000019.hg.1	7,88	6,98	0,12	0,24	T	T	1,87	6,87E-05	0,0016	T	ENST00000625438	DYRK1B	dual specificity tyrosine-(Y)-phosphorylation regulated kinase 1B	Coding
TC0300013547.hg.1	7,76	6,56	0,3	0,44	T	T	2,3	6,92E-05	0,0016	T	NM_004113; NM_021032; ENST00000418610; ENST00000430714; ENST00000440901; ENST00000445105; ENST00000448795; ENST00000450716; ENST00000454309; ENST00000466144; ENST00000491636; BC022524; OTTHUMT00000343100; OTTHUMT00000343160; OTTHUMT00000343161; OTTHUMT00000343162; OTTHUMT00000343163; OTTHUMT00000343164; OTTHUMT00000343165; OTTHUMT00000343166; OTTHUMT00000343167	FGF12	fibroblast growth factor 12	Multiple_Complex
TC0500008054.hg.1	10,18	10,81	0,15	0,09	T	T	-1,55	6,90E-05	0,0016	T	NM_006467; ENST00000399107; ENST00000503373; ENST00000503973; ENST00000504930; ENST00000505345; ENST00000512239; ENST00000514483; ENST00000622335; OTTHUMT00000370462; OTTHUMT00000370464; OTTHUMT00000370465; OTTHUMT00000370466; OTTHUMT00000370467; OTTHUMT00000370468; uc003kjq.3	POLR3G	polymerase (RNA) III (DNA directed) polypeptide G (32kD)	Multiple_Complex
TC0800011074.hg.1	9,34	8,42	0,21	0,09	T	T	1,9	6,90E-05	0,0016	T	NM_001190972; ENST00000517562; OTTHUMT00000376735	C8orf88	chromosome 8 open reading frame 88	Multiple_Complex
TC0X00009129.hg.1	10,99	11,59	0,03	0,03	T	T	-1,51	6,92E-05	0,0016	T	NM_020665; ENST00000380342; BC014317; BC015099; BC050606; OTTHUMT00000055879	TMEM27	transmembrane protein 27	Coding
TC1000010292.hg.1	12,81	13,41	0,04	0,06	T	T	-1,52	6,93E-05	0,0016	T	NM_001184785; NM_001184786; NM_001184787; NM_001184788; NM_001184789; NM_001184790; NM_001184791; NM_001184792; NM_001184793; NM_001184794; NM_019619; ENST00000340077; ENST00000346874; ENST00000350537; ENST00000374768; ENST00000374773; ENST00000374776; ENST00000374788; ENST00000374789; ENST00000374790; ENST00000374794; ENST00000466092; ENST00000544292; ENST00000545260; ENST00000545693; BC071566; …	PARD3	par-3 family cell polarity regulator	Multiple_Complex
TC1700010747.hg.1	10,52	11,19	0,12	0,09	T	T	-1,6	6,94E-05	0,0016	T	NM_001040431; ENST00000328434; ENST00000586680; BC002698	COA3	cytochrome c oxidase assembly factor 3	Multiple_Complex
TC0600011315.hg.1	6,14	5,14	0,22	0,17	T	F	2	6,96E-05	0,0016	F	ENST00000376881; ENST00000376883; ENST00000488757; BC157878; BC171888; OTTHUMT00000132460; OTTHUMT00000355773; uc011dlw.2	ZFP57	ZFP57 zinc finger protein	Multiple_Complex
TC1200012594.hg.1	7,18	6,59	0,16	0,15	T	T	1,5	6,98E-05	0,0016	T	NM_001004328; NR_026788; OTTHUMT00000400448; OTTHUMT00000400449; OTTHUMT00000471355; uc001qug.3	ZNF705A; FAM66C	zinc finger protein 705A; family with sequence similarity 66, member C	Multiple_Complex
TC1700012386.hg.1	8,03	8,87	0,24	0,31	T	T	-1,78	7,00E-05	0,0016	T	NM_001017368; NR_037713; ENST00000315249; ENST00000394597; ENST00000413582; ENST00000414419; ENST00000415395; ENST00000447669; ENST00000580569; ENST00000581039; ENST00000581265; ENST00000582308; ENST00000584541; ENST00000584655; BC028424; OTTHUMT00000256460; OTTHUMT00000256461; OTTHUMT00000256462; OTTHUMT00000256463; OTTHUMT00000256464; OTTHUMT00000448391; OTTHUMT00000448392; OTTHUMT00000448393; …	RFFL	ring finger and FYVE-like domain containing E3 ubiquitin protein ligase	Multiple_Complex
TC1100008886.hg.1	8,15	7,21	0,03	0,18	T	T	1,93	7,02E-05	0,0016	T	NM_032021; ENST00000303130; BC093843; BC112050; OTTHUMT00000395137	TMEM133	transmembrane protein 133	Coding
TC1900009668.hg.1	10,76	10,17	0,04	0,11	T	T	1,5	7,02E-05	0,0016	T	NM_182513; ENST00000423327; ENST00000585486; ENST00000585567; ENST00000586708; ENST00000591396; ENST00000592540; ENST00000592967; BC105037; BC105039; OTTHUMT00000453058; OTTHUMT00000453059; OTTHUMT00000453060; OTTHUMT00000453061; OTTHUMT00000453063; OTTHUMT00000453064; OTTHUMT00000453065	SPC24	SPC24, NDC80 kinetochore complex component	Multiple_Complex
TC0600010057.hg.1	13,31	12,58	0,12	0,06	T	T	1,66	7,13E-05	0,0016	T	NM_001303253; NM_005891; ENST00000367048; ENST00000467951; ENST00000472052; BC000408; OTTHUMT00000042912; OTTHUMT00000042913; OTTHUMT00000042914	ACAT2	acetyl-CoA acetyltransferase 2	Multiple_Complex
TC1700012391.hg.1	8,99	9,85	0,29	0,15	T	T	-1,82	7,13E-05	0,0016	T	NM_001033580; NM_001163735; NM_025109; ENST00000610576; ENST00000610930; ENST00000610992; ENST00000611063; ENST00000611125; ENST00000611622; ENST00000611794; ENST00000612097; ENST00000612392; ENST00000613551; ENST00000614416; ENST00000614623; ENST00000615902; ENST00000616159; ENST00000616207; ENST00000617189; ENST00000620413; ENST00000620567; ENST00000620640; ENST00000620644; ENST00000620869; ENS…	MYO19	myosin XIX	Multiple_Complex
TC0600013186.hg.1	10,61	11,53	0,26	0,06	T	T	-1,89	7,14E-05	0,0016	T	NM_001901; ENST00000367976; BC087839; OTTHUMT00000042239	CTGF	connective tissue growth factor	Multiple_Complex
TC1200010397.hg.1	13,28	13,98	0,03	0,13	T	T	-1,63	7,16E-05	0,0016	T	NM_153634; ENST00000331366; ENST00000360449; ENST00000538596; ENST00000546603; ENST00000547417; ENST00000549842; ENST00000550863; ENST00000551855; ENST00000552259; BC110577; BC110578; OTTHUMT00000403855; OTTHUMT00000403856; OTTHUMT00000403857; OTTHUMT00000403858; OTTHUMT00000403859; OTTHUMT00000403860; OTTHUMT00000403861; OTTHUMT00000403862; OTTHUMT00000403863	CPNE8	copine VIII	Multiple_Complex
TC1600010751.hg.1	8,62	9,39	0,16	0,13	T	T	-1,71	7,17E-05	0,0016	T	NM_058219; ENST00000435634; BC052252; OTTHUMT00000268966	EXOSC6	exosome component 6	Coding
TC1100010030.hg.1	7,35	5,99	0,35	0,28	T	T	2,57	7,18E-05	0,0016	T	NM_001289058; NM_001289059; NM_001289061; NM_030906; ENST00000315204; ENST00000358872; ENST00000396672; ENST00000418597; ENST00000422559; ENST00000431279; ENST00000444064; ENST00000447869; ENST00000454443; ENST00000457885; ENST00000473980; ENST00000486305; ENST00000524760; ENST00000526360; ENST00000526517; ENST00000532336; ENST00000534493; BC031231; OTTHUMT00000276816; OTTHUMT00000276817; OTTHUMT…	STK33	serine/threonine kinase 33	Multiple_Complex
TC1000008385.hg.1	9,71	10,63	0,17	0,23	T	T	-1,89	7,19E-05	0,0016	T	NM_020799; ENST00000371922; ENST00000371924; ENST00000371926; ENST00000371927; ENST00000461650; ENST00000468698; BC010846; OTTHUMT00000049283; OTTHUMT00000049284; OTTHUMT00000049285; OTTHUMT00000049286; OTTHUMT00000049287; OTTHUMT00000049288	STAMBPL1	STAM binding protein-like 1	Multiple_Complex
TC0200010502.hg.1	10,39	11,28	0,12	0,2	T	T	-1,86	7,28E-05	0,0017	T	NM_173511; ENST00000392238; ENST00000481658; BC106906; BC106907; OTTHUMT00000335888; OTTHUMT00000335890	FAM117B	family with sequence similarity 117, member B	Multiple_Complex
TC0400012854.hg.1	8,51	7,35	0,14	0,19	T	T	2,24	7,27E-05	0,0017	T	NM_018342; ENST00000296529; ENST00000502698; ENST00000503200; ENST00000503404; ENST00000504569; ENST00000505049; ENST00000505189; ENST00000508243; ENST00000509278; ENST00000511038; ENST00000511532; ENST00000512272; ENST00000512481; ENST00000513744; ENST00000514346; ENST00000514558; ENST00000514971; BC054487; BC060875; OTTHUMT00000365597; OTTHUMT00000365599; OTTHUMT00000365600; OTTHUMT00000365601;…	TMEM144	transmembrane protein 144	Multiple_Complex
TC1300008702.hg.1	11,83	11,18	0,03	0,05	T	T	1,57	7,28E-05	0,0017	T	NM_001145353; NM_172373; ENST00000239882; ENST00000405737; ENST00000442101; ENST00000498824; ENST00000625359; BC030507; OTTHUMT00000044652; OTTHUMT00000044653; OTTHUMT00000044654; OTTHUMT00000481774	ELF1	E74-like factor 1 (ets domain transcription factor)	Multiple_Complex
TC0800011532.hg.1	8,45	7,41	0,2	0,21	T	T	2,05	7,29E-05	0,0017	T	NM_001282902; NM_001282903; NM_014112; ENST00000220888; ENST00000395713; ENST00000395715; ENST00000422939; ENST00000451156; ENST00000517323; ENST00000518018; ENST00000519076; ENST00000519674; ENST00000519815; ENST00000520276; BC125020; OTTHUMT00000286435; OTTHUMT00000286436; OTTHUMT00000286437; OTTHUMT00000286438; OTTHUMT00000286439; OTTHUMT00000380903; OTTHUMT00000380904; OTTHUMT00000380905; OTT…	TRPS1	trichorhinophalangeal syndrome I	Multiple_Complex
TC0200015729.hg.1	9,99	10,61	0,09	0,06	T	T	-1,53	7,31E-05	0,0017	T	NM_020935; ENST00000258399; ENST00000338465; ENST00000415516; ENST00000418019; ENST00000454775; ENST00000466523; ENST00000473554; ENST00000475553; ENST00000478329; ENST00000484018; ENST00000486242; BC112901; BC133007; BC133009; BC144249; BC144252; OTTHUMT00000256779; OTTHUMT00000338136; OTTHUMT00000338137; OTTHUMT00000338138; OTTHUMT00000338139; OTTHUMT00000338140; OTTHUMT00000338141; OTTHUMT0000…	USP37	ubiquitin specific peptidase 37	Multiple_Complex
TC0700013423.hg.1	9,03	9,91	0,04	0,22	T	T	-1,83	7,34E-05	0,0017	T	NM_001009958; NM_001009960; NM_001083956; NM_001085366; NM_001085367; NM_001085368; NM_024061; NM_138494; ENST00000252713; ENST00000320583; ENST00000357864; ENST00000394163; ENST00000412636; ENST00000416144; ENST00000419215; ENST00000422164; ENST00000422422; ENST00000422647; ENST00000423973; ENST00000424881; ENST00000425063; ENST00000427931; ENST00000440391; ENST00000449244; ENST00000452314; ENST…	ZNF655	zinc finger protein 655	Multiple_Complex
TC0800011764.hg.1	8,59	7,93	0,15	0,21	T	T	1,58	7,39E-05	0,0017	T	NM_174911; ENST00000304916; ENST00000517458; BC052957; OTTHUMT00000381487; OTTHUMT00000381488	FAM84B	family with sequence similarity 84, member B	Multiple_Complex
TC0300008558.hg.1	10,08	9,36	0,12	0,09	T	T	1,65	7,42E-05	0,0017	T	NM_138287; ENST00000296161; ENST00000383661; BC042191; BC060509; OTTHUMT00000355966; OTTHUMT00000355967	DTX3L	deltex 3 like, E3 ubiquitin ligase	Multiple_Complex
TC0300009202.hg.1	14,4	15	0,01	0,05	T	T	-1,52	7,46E-05	0,0017	T	NM_021038; NM_207292; NM_207293; NM_207294; NM_207295; NM_207296; NM_207297; ENST00000282486; ENST00000282488; ENST00000324196; ENST00000324210; ENST00000355460; ENST00000357472; ENST00000459747; ENST00000460166; ENST00000460591; ENST00000461436; ENST00000463374; ENST00000464596; ENST00000465907; ENST00000466565; ENST00000477171; ENST00000478535; ENST00000485509; ENST00000485910; ENST00000492948;…	MBNL1	muscleblind like splicing regulator 1	Multiple_Complex
TC0100008450.hg.1	8,52	7,72	0,07	0,11	T	T	1,74	7,47E-05	0,0017	T	NM_006252; ENST00000371244; ENST00000610361; BC069680; BC069740; BC069823; OTTHUMT00000022753	PRKAA2	protein kinase, AMP-activated, alpha 2 catalytic subunit	Multiple_Complex
TC1500010726.hg.1	10,19	9,45	0,09	0,16	T	T	1,67	7,51E-05	0,0017	T	NM_024956; ENST00000260403; ENST00000563859; ENST00000564494; ENST00000564698; ENST00000565291; ENST00000566122; ENST00000566308; ENST00000567441; ENST00000568182; ENST00000568197; ENST00000569369; ENST00000569535; ENST00000569897; ENST00000569926; ENST00000570109; BC009981; OTTHUMT00000432224; OTTHUMT00000432225; OTTHUMT00000432226; OTTHUMT00000432227; OTTHUMT00000432228; OTTHUMT00000432229; OTT…	TMEM62	transmembrane protein 62	Multiple_Complex
TC0600011372.hg.1	10,49	11,27	0,17	0,16	T	T	-1,72	7,52E-05	0,0017	T	ENST00000376511; ENST00000461593; ENST00000468181; ENST00000473954; ENST00000476704; ENST00000484449; ENST00000496955; BC136294; OTTHUMT00000076556; OTTHUMT00000256173; OTTHUMT00000256174; OTTHUMT00000256175; OTTHUMT00000256176; OTTHUMT00000256177; OTTHUMT00000256178	PPP1R10	protein phosphatase 1, regulatory subunit 10	Multiple_Complex
TC0200014509.hg.1	11,22	11,87	0,14	0,12	T	T	-1,57	7,56E-05	0,0017	T	NM_001006636; NM_001164629; NM_001284233; NM_001284234; NM_001284235; NM_001284238; NM_024659; ENST00000241391; ENST00000344850; ENST00000392867; ENST00000392869; ENST00000392871; ENST00000409214; ENST00000409298; ENST00000415569; ENST00000417450; ENST00000429978; ENST00000437114; ENST00000463875; ENST00000467352; ENST00000476958; ENST00000482601; ENST00000482961; ENST00000484303; ENST00000491448…	GTDC1	glycosyltransferase like domain containing 1	Multiple_Complex
TC0700010286.hg.1	9,38	8,6	0,27	0,14	T	T	1,71	7,58E-05	0,0017	T	NM_001135924; ENST00000275358; ENST00000326715; ENST00000452576; ENST00000485526; ENST00000521169; ENST00000614403; BC144319; OTTHUMT00000325870; OTTHUMT00000325871; OTTHUMT00000326030; OTTHUMT00000375966; OTTHUMT00000375967	VWDE	von Willebrand factor D and EGF domains	Multiple_Complex
TC0100015550.hg.1	14,1	14,8	0,11	0,06	T	T	-1,64	7,59E-05	0,0017	T	NM_001287385; ENST00000369175; ENST00000584486; OTTHUMT00000098432; OTTHUMT00000476752	FAM72C	family with sequence similarity 72, member C	Multiple_Complex
TC0800006975.hg.1	11,51	10,5	0,37	0,17	T	T	2,01	7,66E-05	0,0017	T	NM_001199; NM_006129; NR_033403; NR_033404; ENST00000306349; ENST00000306385; ENST00000354870; ENST00000397814; ENST00000471755; ENST00000483364; ENST00000517324; ENST00000518656; ENST00000518913; ENST00000520626; ENST00000520970; ENST00000520982; ENST00000521385; ENST00000521521; ENST00000522332; ENST00000523457; ENST00000523749; ENST00000523849; BC136679; BC142953; OTTHUMT00000214995; OTTHUMT00…	BMP1	bone morphogenetic protein 1	Multiple_Complex
TC0600007158.hg.1	11,9	11,01	0,11	0,11	T	T	1,85	7,70E-05	0,0017	T	NM_003107; ENST00000244745; BC072668; OTTHUMT00000043301	SOX4	SRY box 4	Multiple_Complex
TC0100009534.hg.1	8,39	7,66	0,13	0,07	T	T	1,66	7,71E-05	0,0017	T	NM_018420; ENST00000369502; ENST00000369503; ENST00000481127; BC026358; OTTHUMT00000033220; OTTHUMT00000033221; OTTHUMT00000097502; uc001egb.4	SLC22A15	solute carrier family 22, member 15	Multiple_Complex
TC0900009785.hg.1	7,49	6,49	0,29	0,26	T	T	2,01	7,75E-05	0,0017	T	NM_001258282; NM_152570; ENST00000308675; ENST00000379992; ENST00000493941; ENST00000613945; BC137514; BC144676; OTTHUMT00000051978; OTTHUMT00000051979	LINGO2	leucine rich repeat and Ig domain containing 2	Multiple_Complex
TC2000008678.hg.1	9,7	8,75	0,1	0,21	T	T	1,94	7,76E-05	0,0017	T	NM_000099; NM_001288614; ENST00000376925; ENST00000398409; ENST00000398411; BC013083; BC110305; OTTHUMT00000078346; OTTHUMT00000256831; OTTHUMT00000256832	CST3	cystatin C	Multiple_Complex
TC1500008840.hg.1	13,2	13,91	0,06	0,2	T	T	-1,63	7,78E-05	0,0017	T	NM_001301026; NM_003257; NM_175610; ENST00000346128; ENST00000356107; ENST00000400007; ENST00000400011; ENST00000462916; ENST00000473741; ENST00000485381; ENST00000495972; ENST00000545208; ENST00000558447; ENST00000561307; ENST00000614355; BC111712; OTTHUMT00000268237; OTTHUMT00000268241; OTTHUMT00000268242; OTTHUMT00000268243; OTTHUMT00000268244; OTTHUMT00000268245; OTTHUMT00000417263; OTTHUMT00…	TJP1	tight junction protein 1	Multiple_Complex
TC0600009862.hg.1	12,82	13,5	0,1	0,1	T	T	-1,6	7,84E-05	0,0018	T	NM_005100; NM_144497; ENST00000253332; ENST00000354675; ENST00000359755; ENST00000402676; ENST00000490177; OTTHUMT00000042712; OTTHUMT00000042713; OTTHUMT00000042714	AKAP12	A kinase (PRKA) anchor protein 12	Multiple_Complex
TC0100017849.hg.1	9,97	10,73	0,13	0,09	T	T	-1,7	7,88E-05	0,0018	T	NM_019891; ENST00000264181; ENST00000354619; ENST00000366589; BC032823; BC044573; OTTHUMT00000096371; OTTHUMT00000096372; OTTHUMT00000096373	ERO1B	endoplasmic reticulum oxidoreductase beta	Multiple_Complex
TC2000007380.hg.1	11,44	12,13	0,2	0,09	T	T	-1,62	8,00E-05	0,0018	T	NM_003286; ENST00000361337; BC136297; OTTHUMT00000080397	TOP1	topoisomerase (DNA) I	Multiple_Complex
TC0500012842.hg.1	12,02	12,76	0,06	0,14	T	T	-1,67	8,03E-05	0,0018	T	NM_004417; ENST00000239223; BC022463; OTTHUMT00000252943	DUSP1	dual specificity phosphatase 1	Multiple_Complex
TC0X00011300.hg.1	5,87	4,98	0,22	0,17	T	F	1,85	8,05E-05	0,0018	F	NM_001010888; ENST00000338957; BC140767; BC171781; OTTHUMT00000378734; uc010nko.3	ZC3H12B	zinc finger CCCH-type containing 12B	Multiple_Complex
TC1900007847.hg.1	10,14	8,98	0,12	0,38	T	T	2,22	8,09E-05	0,0018	T	NM_003367; NM_207291; ENST00000222305; ENST00000343550; ENST00000379134; ENST00000593708; ENST00000594064; ENST00000594264; ENST00000595068; ENST00000596380; ENST00000597671; ENST00000598058; ENST00000599471; ENST00000599625; ENST00000600341; ENST00000600898; ENST00000602164; ENST00000607959; BC049821; OTTHUMT00000465523; OTTHUMT00000465524; OTTHUMT00000465525; OTTHUMT00000465526; OTTHUMT00000466…	USF2	upstream transcription factor 2, c-fos interacting	Multiple_Complex
TC0600007306.hg.1	9,77	8,83	0,03	0,23	T	T	1,92	8,13E-05	0,0018	T	NM_001242803; NM_006994; NM_197974; ENST00000244519; ENST00000361232; ENST00000467524; ENST00000471353; ENST00000474790; ENST00000477388; ENST00000480110; ENST00000482451; ENST00000483179; ENST00000487272; ENST00000487627; ENST00000490254; ENST00000494393; ENST00000496719; ENST00000497681; BC015815; OTTHUMT00000040116; OTTHUMT00000354136; OTTHUMT00000354137; OTTHUMT00000354138; OTTHUMT00000354139…	BTN3A3	butyrophilin, subfamily 3, member A3	Multiple_Complex
TC1700009504.hg.1	9,08	9,89	0,08	0,11	T	T	-1,75	8,14E-05	0,0018	T	NM_001257999; NM_016376; NR_047571; ENST00000341657; ENST00000570535; ENST00000570934; ENST00000571547; ENST00000572412; ENST00000572564; ENST00000573250; ENST00000573722; ENST00000574367; ENST00000574736; ENST00000575298; ENST00000575509; ENST00000575955; OTTHUMT00000438702; OTTHUMT00000438703; OTTHUMT00000438705; OTTHUMT00000438706; OTTHUMT00000438708; OTTHUMT00000438709; OTTHUMT00000438710; OT…	ANKFY1	ankyrin repeat and FYVE domain containing 1	Multiple_Complex
TC0600009350.hg.1	9,24	9,97	0,14	0,03	T	T	-1,66	8,15E-05	0,0018	T	NM_001286398; NM_152553; NR_104440; ENST00000359704; ENST00000368414; ENST00000368415; ENST00000431104; ENST00000432158; ENST00000454842; ENST00000519565; ENST00000519799; ENST00000519971; ENST00000521654; ENST00000560949; BC026087; OTTHUMT00000042062; OTTHUMT00000042063; OTTHUMT00000042064; OTTHUMT00000381410; OTTHUMT00000381411; OTTHUMT00000381412; OTTHUMT00000381413; OTTHUMT00000381414; OTTHUM…	RNF217	ring finger protein 217	Multiple_Complex
TC0300012975.hg.1	10,25	9,59	0,15	0,12	T	T	1,58	8,19E-05	0,0018	T	NM_001038628; NM_003781; NM_033167; NM_033168; NM_033169; ENST00000320474; ENST00000392779; ENST00000392781; ENST00000417187; ENST00000460353; ENST00000468268; ENST00000473142; ENST00000473285; ENST00000476999; ENST00000478383; ENST00000484127; ENST00000488170; ENST00000492353; ENST00000494173; ENST00000494818; ENST00000496295; ENST00000497487; ENST00000498216; BC028571; BC047618; OTTHUMT00000353…	B3GALNT1	beta-1,3-N-acetylgalactosaminyltransferase 1 (globoside blood group)	Multiple_Complex
TC1300008511.hg.1	10,1	9,31	0,14	0,11	T	T	1,72	8,26E-05	0,0018	T	NM_001014380; NM_032116; ENST00000380615; ENST00000380617; ENST00000414289; ENST00000441394; ENST00000480854; BC000612; OTTHUMT00000044346; OTTHUMT00000125962; OTTHUMT00000125963; OTTHUMT00000303978; OTTHUMT00000303979	KATNAL1	katanin p60 subunit A-like 1	Multiple_Complex
TC2000008318.hg.1	10,68	9,97	0,11	0,16	T	T	1,64	8,27E-05	0,0018	T	NM_017671; ENST00000217289; ENST00000378844; ENST00000478194; ENST00000536936; BC035882; BC040545; OTTHUMT00000077908; OTTHUMT00000077909; OTTHUMT00000077911; uc002wmr.3	FERMT1	fermitin family member 1	Multiple_Complex
TC1800008743.hg.1	7,33	8,13	0,11	0,07	T	T	-1,75	8,33E-05	0,0018	T	NM_001143829; NM_025214; ENST00000337363; ENST00000432185; ENST00000587148; ENST00000591504; ENST00000592040; ENST00000592294; BC029508; OTTHUMT00000256006; OTTHUMT00000448363; OTTHUMT00000448364; OTTHUMT00000448365; OTTHUMT00000448367; uc002lft.3	CCDC68	coiled-coil domain containing 68	Multiple_Complex
TC0100009760.hg.1	13,6	12,88	0,14	0,07	T	T	1,64	8,40E-05	0,0019	T	NR_002212; NR_104005; BC051310; OTTHUMT00000477855	NUDT4P1; NUDT4P2; NUDT4	nudix hydrolase 4 pseudogene 1; nudix hydrolase 4 pseudogene 2; nudix hydrolase 4	Multiple_Complex
TC0100009833.hg.1	13,6	12,88	0,14	0,07	T	T	1,64	8,40E-05	0,0019	T	BC012069; OTTHUMT00000477870	NUDT4; NUDT4P1	nudix hydrolase 4; nudix hydrolase 4 pseudogene 1	Multiple_Complex
TC0X00009780.hg.1	10,79	9,93	0,15	0,19	T	T	1,81	8,41E-05	0,0019	T	NM_004463; ENST00000375135; BC034530; OTTHUMT00000056801; uc004dtg.3	FGD1	FYVE, RhoGEF and PH domain containing 1	Multiple_Complex
TC2000009026.hg.1	12,37	13,21	0,17	0,14	T	T	-1,79	8,42E-05	0,0019	T	NM_002895; NM_183404; ENST00000344359; ENST00000373664; ENST00000525052; ENST00000527999; BC032247; OTTHUMT00000079067; OTTHUMT00000079068; OTTHUMT00000383546; OTTHUMT00000383547	RBL1	retinoblastoma-like 1	Multiple_Complex
TC1900009176.hg.1	10,98	10,13	0,17	0,09	T	T	1,8	8,46E-05	0,0019	T	NM_001136139; NM_003200; ENST00000262965; ENST00000344749; ENST00000395423; ENST00000453954; ENST00000585731; ENST00000585855; ENST00000586164; ENST00000586318; ENST00000586410; ENST00000587235; ENST00000587425; ENST00000588136; ENST00000590436; ENST00000590605; ENST00000590684; ENST00000592395; ENST00000592628; ENST00000593064; ENST00000610756; ENST00000611869; BC110580; OTTHUMT00000449367; OTTH…	TCF3	transcription factor 3	Multiple_Complex
TC0300006847.hg.1	10,08	9,47	0,02	0,05	T	T	1,53	8,62E-05	0,0019	T	NM_001145425; NM_005126; NR_110524; ENST00000312521; ENST00000383773; ENST00000468700; ENST00000472780; ENST00000492552; BC045613; BC070035; OTTHUMT00000341017; OTTHUMT00000341018; OTTHUMT00000341019; OTTHUMT00000341062; OTTHUMT00000341063; uc003ccs.2	NR1D2	nuclear receptor subfamily 1, group D, member 2	Multiple_Complex
TC1100013222.hg.1	9,45	7,6	0,58	0,19	T	T	3,6	8,68E-05	0,0019	T	NM_001017534; NM_052889; ENST00000375704; ENST00000375706; ENST00000527065; ENST00000528513; OTTHUMT00000388147; OTTHUMT00000388148; OTTHUMT00000388151; OTTHUMT00000388152	CARD16	caspase recruitment domain family, member 16	Multiple_Complex
TC1400010604.hg.1	6,68	5,9	0,17	0,11	T	F	1,71	8,74E-05	0,0019	F	NM_054024; ENST00000280082; ENST00000555143; ENST00000556784; ENST00000557148; BC130537; BC130563; OTTHUMT00000276768; OTTHUMT00000410031; OTTHUMT00000410032; OTTHUMT00000410207	MIA2	melanoma inhibitory activity 2	Multiple_Complex
TC1700010847.hg.1	12,6	13,32	0,11	0,07	T	T	-1,65	8,76E-05	0,0019	T	NM_001080383; NM_005497; ENST00000330514; ENST00000426548; ENST00000586267; ENST00000586347; ENST00000587113; ENST00000587239; ENST00000590758; ENST00000591424; ENST00000592524; BC096213; BC096214; BC096215; BC096216; OTTHUMT00000448657; OTTHUMT00000448658; OTTHUMT00000448659; OTTHUMT00000448660; OTTHUMT00000448661; OTTHUMT00000448662; OTTHUMT00000448663; OTTHUMT00000448664; uc002ihl.3	GJC1	gap junction protein gamma 1	Multiple_Complex
TC1900010172.hg.1	8,72	9,53	0,04	0,13	T	T	-1,75	8,76E-05	0,0019	T	NM_001001411; ENST00000397121; OTTHUMT00000464392	ZNF676	zinc finger protein 676	Coding
TC0400012967.hg.1	9,59	10,36	0,12	0,16	T	T	-1,7	8,78E-05	0,0019	T	NM_032623; ENST00000398955; BC104173; BC104174; OTTHUMT00000364536; uc003ihr.1	MGARP	mitochondria localized glutamic acid rich protein	Coding
TC0700007034.hg.1	11,24	12	0,15	0,1	T	T	-1,7	8,80E-05	0,0019	T	NM_001011666; NM_004904; NM_182898; NM_182899; ENST00000357727; ENST00000396298; ENST00000396299; ENST00000396300; ENST00000409603; ENST00000424599; ENST00000426500; ENST00000461921; ENST00000468391; ENST00000468813; ENST00000469531; ENST00000478078; ENST00000482692; ENST00000484383; ENST00000498316; BC059400; OTTHUMT00000214204; OTTHUMT00000214205; OTTHUMT00000327908; OTTHUMT00000327909; OTTHUMT…	CREB5	cAMP responsive element binding protein 5	Multiple_Complex
TC1600011570.hg.1	11,67	12,47	0,02	0,14	T	T	-1,74	8,79E-05	0,0019	T	NM_020188; ENST00000219400; ENST00000486645; ENST00000561614; ENST00000562713; ENST00000562828; ENST00000563779; ENST00000564174; ENST00000564249; ENST00000565108; ENST00000565514; ENST00000565613; ENST00000565650; ENST00000565925; ENST00000566047; ENST00000566231; ENST00000566918; ENST00000567593; ENST00000568228; ENST00000569187; ENST00000569666; ENST00000570086; ENST00000570195; ENST0000063039…	CMC2	C-x(9)-C motif containing 2	Multiple_Complex
TC0100008090.hg.1	8,32	7,67	0,15	0,1	T	T	1,58	8,91E-05	0,0019	T	NM_001034023; NM_001034024; NM_019100; ENST00000315913; ENST00000361745; ENST00000372289; ENST00000372290; ENST00000436069; ENST00000437511; ENST00000440641; ENST00000446292; ENST00000463950; ENST00000471829; ENST00000475794; ENST00000483741; ENST00000487922; ENST00000488433; ENST00000494092; BC002855; BC008053; OTTHUMT00000020025; OTTHUMT00000020026; OTTHUMT00000020027; OTTHUMT00000020028; OTTHU…	DMAP1	DNA methyltransferase 1 associated protein 1	Multiple_Complex
TC0100016625.hg.1	11,3	12,09	0,03	0,21	T	T	-1,74	8,95E-05	0,0019	T	NM_001033044; NM_001033056; NM_002065; ENST00000311223; ENST00000331872; ENST00000339526; ENST00000417584; ENST00000461447; ENST00000462444; ENST00000463851; ENST00000475808; ENST00000480604; ENST00000484996; ENST00000489818; ENST00000491322; ENST00000621524; BC010037; BC011700; BC011852; BC018992; BC031964; BC051726; OTTHUMT00000091043; OTTHUMT00000091044; OTTHUMT00000091045; OTTHUMT00000091046;…	GLUL	glutamate-ammonia ligase	Multiple_Complex
TC0500011712.hg.1	8,93	7,78	0,37	0,12	T	T	2,22	8,95E-05	0,0019	T	NM_022140; ENST00000261486; ENST00000305368; ENST00000507810; ENST00000509342; ENST00000511405; ENST00000511790; ENST00000512395; ENST00000513333; ENST00000514203; ENST00000515047; ENST00000621003; OTTHUMT00000370969; OTTHUMT00000370970; OTTHUMT00000370971; OTTHUMT00000370972; OTTHUMT00000370973; OTTHUMT00000370974; OTTHUMT00000370975; OTTHUMT00000370981; OTTHUMT00000370982; OTTHUMT00000370983; u…	EPB41L4A	erythrocyte membrane protein band 4.1 like 4A	Multiple_Complex
TC1000012164.hg.1	10,73	10,12	0,05	0,03	T	T	1,53	8,99E-05	0,0020	T	NM_018180; ENST00000284690; ENST00000368721; ENST00000415732; BC002473; BC068471; OTTHUMT00000050945; OTTHUMT00000050946; OTTHUMT00000050947; uc001ljf.1	DHX32	DEAH (Asp-Glu-Ala-His) box polypeptide 32	Multiple_Complex
TC0100018261.hg.1	8,96	8,17	0,1	0,14	T	T	1,73	9,06E-05	0,0020	T	NM_000850; NM_147148; NR_024538; ENST00000326729; ENST00000369833; ENST00000369836; ENST00000461767; ENST00000464733; ENST00000478397; ENST00000479578; ENST00000485640; ENST00000493171; ENST00000493395; ENST00000495742; BC015513; BC108729; OTTHUMT00000032187; OTTHUMT00000032188; OTTHUMT00000032189; OTTHUMT00000032190; OTTHUMT00000032191; OTTHUMT00000032192; OTTHUMT00000032193; OTTHUMT00000032194;…	GSTM4	glutathione S-transferase mu 4	Multiple_Complex
TC0300009192.hg.1	5,37	6,24	0,08	0,21	F	T	-1,83	9,08E-05	0,0020	F	NM_001086; ENST00000232892; ENST00000488869; BC032309; OTTHUMT00000357883; OTTHUMT00000357884	AADAC	arylacetamide deacetylase	Coding
TC0500007681.hg.1	12,82	13,43	0,05	0,06	T	T	-1,52	9,19E-05	0,0020	T	NM_001205254; NM_001205255; NM_002538; ENST00000355237; ENST00000396442; ENST00000510666; ENST00000514370; ENST00000538151; BC029886; OTTHUMT00000216794; OTTHUMT00000369585; OTTHUMT00000369586; OTTHUMT00000369587; uc003jwu.3; uc021xzq.1	OCLN	occludin	Multiple_Complex
TC0900011246.hg.1	10,9	10,09	0,12	0,19	T	T	1,76	9,27E-05	0,0020	T	NM_001101338	ZNF883	zinc finger protein 883	Multiple_Complex
TC1000008951.hg.1	5,3	4,13	0,19	0,35	T	F	2,24	9,27E-05	0,0020	F	NM_001177660; NM_004132; ENST00000351270; ENST00000460714; ENST00000542051; BC031412; OTTHUMT00000050428; OTTHUMT00000050429	HABP2	hyaluronan binding protein 2	Multiple_Complex
TC1600007312.hg.1	9,39	10,26	0,2	0,18	T	T	-1,82	9,27E-05	0,0020	T	NM_000418; NM_001257406; NM_001257407; NM_001257997; ENST00000170630; ENST00000395762; ENST00000543915; ENST00000561742; ENST00000561946; ENST00000562142; ENST00000562968; ENST00000563002; ENST00000563787; ENST00000563886; ENST00000563926; ENST00000565179; ENST00000565352; ENST00000565696; ENST00000565915; ENST00000566117; ENST00000566318; ENST00000568746; ENST00000628578; BC136365; BC151131; OTT…	IL4R	interleukin 4 receptor	Multiple_Complex
TC1100012445.hg.1	8,4	7,25	0,29	0,2	T	T	2,21	9,30E-05	0,0020	T	NM_001207048; NM_001207049; NM_012104; NM_138971; NM_138972; NM_138973; ENST00000313005; ENST00000392937; ENST00000428381; ENST00000445823; ENST00000504995; ENST00000509916; ENST00000510630; ENST00000510915; ENST00000513780; ENST00000514464; ENST00000528053; ENST00000530824; BC036084; BC065492; OTTHUMT00000361505; OTTHUMT00000361506; OTTHUMT00000361507; OTTHUMT00000361508; OTTHUMT00000361509; OTT…	BACE1	beta-site APP-cleaving enzyme 1	Multiple_Complex
TC0100013928.hg.1	9,9	9,04	0,06	0,19	T	T	1,81	9,34E-05	0,0020	T	NM_001190880; NM_001243526; NM_031207; ENST00000372425; ENST00000372427; ENST00000372430; ENST00000372432; ENST00000372433; ENST00000372434; ENST00000469587; ENST00000470662; ENST00000483618; ENST00000486909; ENST00000487366; ENST00000496142; ENST00000583037; BC006140; BC019041; OTTHUMT00000019718; OTTHUMT00000019719; OTTHUMT00000019720; OTTHUMT00000019721; OTTHUMT00000019722; OTTHUMT00000019723;…	HYI	hydroxypyruvate isomerase (putative)	Multiple_Complex
TC0300012498.hg.1	11,13	11,73	0,04	0,09	T	T	-1,51	9,39E-05	0,0020	T	NM_001242374; NM_001242375; NM_015391; ENST00000354910; ENST00000503439; ENST00000508755; ENST00000510994; ENST00000511751; ENST00000514612; BC005398; OTTHUMT00000357412; OTTHUMT00000357414; OTTHUMT00000357415; OTTHUMT00000357416; OTTHUMT00000357417; OTTHUMT00000357420	ANAPC13	anaphase promoting complex subunit 13	Multiple_Complex
TC1200009177.hg.1	7,44	6,56	0,23	0,19	T	T	1,83	9,39E-05	0,0020	T	NM_001080825; ENST00000342607; ENST00000411958; ENST00000416147; ENST00000449592; ENST00000538055; ENST00000540377; ENST00000541467; BC127768; BC127769; OTTHUMT00000402157; OTTHUMT00000402158; OTTHUMT00000402159; OTTHUMT00000402160; OTTHUMT00000402161; OTTHUMT00000402162; OTTHUMT00000402163	TMEM120B	transmembrane protein 120B	Multiple_Complex
TC0900007865.hg.1	9,41	10,3	0,11	0,21	T	T	-1,86	9,49E-05	0,0020	T	NM_001282688; NM_001282689; NM_001282690; NM_024077; ENST00000339901; ENST00000375807; ENST00000425851; ENST00000440898; ENST00000470305; ENST00000477484; ENST00000496597; ENST00000498819; ENST00000534113; BC036109; OTTHUMT00000052990; OTTHUMT00000052991; OTTHUMT00000052992; OTTHUMT00000143493; OTTHUMT00000143494; OTTHUMT00000143495; OTTHUMT00000143636; OTTHUMT00000143637	SECISBP2	SECIS binding protein 2	Multiple_Complex
TC1200007560.hg.1	8,92	7,63	0,36	0,16	T	T	2,45	9,49E-05	0,0020	T	NM_001304944; NM_024902; ENST00000395069; ENST00000549441; ENST00000551153; ENST00000552651; BC033236; OTTHUMT00000404302; OTTHUMT00000404303; OTTHUMT00000404306; OTTHUMT00000404307	DNAJC22	DnaJ (Hsp40) homolog, subfamily C, member 22	Multiple_Complex
TC2200007910.hg.1	9,85	10,79	0,28	0,18	T	T	-1,92	9,58E-05	0,0021	T	MICAL3.vdAug10-unspliced	MICAL3	Transcript Identified by AceView, Entrez Gene ID(s) 57553	Unassigned
TC0X00008533.hg.1	10,85	11,51	0,12	0,06	T	T	-1,58	9,65E-05	0,0021	T	NM_001163280; NM_014500; ENST00000218364; ENST00000425695; ENST00000448450; ENST00000535601; BC009896; OTTHUMT00000058497; OTTHUMT00000058498; OTTHUMT00000058499	HTATSF1	HIV-1 Tat specific factor 1	Coding
TC1600008218.hg.1	8,48	9,9	0,22	0,22	T	T	-2,66	9,70E-05	0,0021	T	NM_001199280; NM_005329; NM_138612; ENST00000219322; ENST00000306560; ENST00000566118; ENST00000568321; ENST00000569188; BC021853; OTTHUMT00000268898; OTTHUMT00000268899; OTTHUMT00000433333; OTTHUMT00000433334; OTTHUMT00000433335	HAS3	hyaluronan synthase 3	Multiple_Complex
TC0700013509.hg.1	12,22	13,35	0,28	0,08	T	T	-2,18	9,72E-05	0,0021	T	NM_001142936; NM_139179; ENST00000297056; ENST00000425398; ENST00000432248; ENST00000454738; ENST00000462934; ENST00000479922; ENST00000482149; ENST00000483716; ENST00000497308; BC027603; OTTHUMT00000246840; OTTHUMT00000341922; OTTHUMT00000341923; OTTHUMT00000341924; OTTHUMT00000341925; OTTHUMT00000341928; OTTHUMT00000341930; OTTHUMT00000341931; OTTHUMT00000341932	DAGLB	diacylglycerol lipase, beta	Multiple_Complex
TC1600011569.hg.1	9,75	10,44	0,08	0,1	T	T	-1,6	9,72E-05	0,0021	T	NM_012091; NR_036460; ENST00000307921; ENST00000562374; ENST00000564657; ENST00000565109; ENST00000566445; ENST00000566450; ENST00000567281; ENST00000568001; ENST00000568478; ENST00000568510; BC002758; OTTHUMT00000269027; OTTHUMT00000435498; OTTHUMT00000435499; OTTHUMT00000435500; OTTHUMT00000435501; OTTHUMT00000435503; OTTHUMT00000435504; OTTHUMT00000435505; OTTHUMT00000435506; OTTHUMT00000435507	ADAT1	adenosine deaminase, tRNA-specific 1	Multiple_Complex
TC1700011448.hg.1	8,88	9,66	0,11	0,17	T	T	-1,71	9,77E-05	0,0021	T	NM_007215; ENST00000539111; ENST00000577506; ENST00000578687; ENST00000578997; ENST00000580490; ENST00000580893; ENST00000581355; ENST00000582501; ENST00000585104; ENST00000585141; BC009194; OTTHUMT00000443820; OTTHUMT00000443821; OTTHUMT00000443822; OTTHUMT00000443823; OTTHUMT00000443824; OTTHUMT00000443825; OTTHUMT00000443826; OTTHUMT00000443827; OTTHUMT00000444025; OTTHUMT00000444026	POLG2	polymerase (DNA directed), gamma 2, accessory subunit	Multiple_Complex
TC1200008574.hg.1	9,4	10,05	0,14	0,05	T	T	-1,57	9,82E-05	0,0021	T	NM_001160; NM_013229; NM_181861; NM_181868; NM_181869; ENST00000333991; ENST00000357310; ENST00000359972; ENST00000546491; ENST00000547045; ENST00000547666; ENST00000547743; ENST00000549007; ENST00000550527; ENST00000551964; ENST00000552268; ENST00000552929; ENST00000555047; BC136531; BC136532; BC150255; OTTHUMT00000408006; OTTHUMT00000408007; OTTHUMT00000408008; OTTHUMT00000408009; OTTHUMT000004…	APAF1	apoptotic peptidase activating factor 1	Multiple_Complex
TC0X00011338.hg.1	8,08	8,95	0,21	0,18	T	T	-1,84	9,92E-05	0,0021	T	NM_001669; ENST00000217890; ENST00000381154; ENST00000458014; ENST00000481340; ENST00000494870; ENST00000495294; ENST00000559324; OTTHUMT00000055635; OTTHUMT00000055636; OTTHUMT00000055637; OTTHUMT00000055638; OTTHUMT00000055639; OTTHUMT00000055640; OTTHUMT00000418820	ARSD	arylsulfatase D	Multiple_Complex
TC1900006932.hg.1	10,66	9,81	0,07	0,2	T	T	1,79	9,94E-05	0,0021	T	NM_001172650; NM_001172651; NM_001202406; NM_001202407; NM_001202408; NM_001202409; NM_001202410; NM_001202411; NM_001202412; NM_001202425; NM_003451; NM_032497; ENST00000317221; ENST00000343499; ENST00000393883; ENST00000434737; ENST00000446085; ENST00000541595; ENST00000585352; ENST00000585377; ENST00000586255; ENST00000587557; ENST00000588124; ENST00000589208; ENST00000589262; ENST00000590616;…	ZNF559-ZNF177; ZNF177; ZNF559	ZNF559-ZNF177 readthrough; zinc finger protein 177; zinc finger protein 559	Multiple_Complex
TC1200012668.hg.1	10,08	9,39	0,23	0,16	T	T	1,62	9,99E-05	0,0021	T	NM_013381; ENST00000261180; ENST00000547300; ENST00000549138; ENST00000549401; ENST00000549922; ENST00000552503; BC142706; BC150181; OTTHUMT00000405380; OTTHUMT00000405381; OTTHUMT00000405382; OTTHUMT00000405383; OTTHUMT00000405384; OTTHUMT00000405385	TRHDE	thyrotropin-releasing hormone degrading enzyme	Multiple_Complex
TC0100015058.hg.1	12,45	13,09	0,02	0,12	T	T	-1,56	0,0001	0,0021	T	NM_001304829; NM_194292; ENST00000287482; ENST00000462159; BC101026; OTTHUMT00000029656; OTTHUMT00000029912	SASS6	SAS-6 centriolar assembly protein	Multiple_Complex
TC0200015869.hg.1	12,83	12,24	0,05	0,12	T	T	1,5	0,0001	0,0021	T	NM_001039569; NR_110905; NR_110906; ENST00000334271; ENST00000396653; ENST00000396654; ENST00000409375; ENST00000415298; ENST00000443700; ENST00000444408; ENST00000446015; BC009606; BC021898; OTTHUMT00000256867; OTTHUMT00000256868; OTTHUMT00000256869; OTTHUMT00000330920; OTTHUMT00000330921; OTTHUMT00000330922; OTTHUMT00000353158; OTTHUMT00000383293	AP1S3	adaptor-related protein complex 1 sigma 3 subunit	Multiple_Complex
TC0700013119.hg.1	12,39	13	0,18	0,06	T	T	-1,53	0,0001	0,0021	T	NM_005431; ENST00000359321; ENST00000495707; BC042137; OTTHUMT00000322783; OTTHUMT00000322784	XRCC2	X-ray repair complementing defective repair in Chinese hamster cells 2	Multiple_Complex
TC2000008130.hg.1	10,89	10,18	0,09	0,14	T	T	1,64	0,0001	0,0021	T	NM_144628; NR_111901; ENST00000354200; ENST00000461188; ENST00000461304; ENST00000494633; BC014983; OTTHUMT00000077467; OTTHUMT00000077468; OTTHUMT00000077469; OTTHUMT00000251397	TBC1D20	TBC1 domain family, member 20	Multiple_Complex
TC1900011707.hg.1	11,27	10,72	0,16	0,1	T	T	1,46	0,0001	0,0021	T	NM_000175; NM_001184722; NM_001289789; NM_001289790; ENST00000356487; ENST00000415930; ENST00000586077; ENST00000586392; ENST00000586425; ENST00000587384; ENST00000587521; ENST00000588991; ENST00000589399; ENST00000589504; ENST00000589640; ENST00000589985; ENST00000590362; ENST00000590375; ENST00000591204; ENST00000592144; ENST00000592277; BC004982; OTTHUMT00000451684; OTTHUMT00000451685; OTTHUMT…	GPI	glucose-6-phosphate isomerase	Multiple_Complex
TC0100008797.hg.1	11,95	11,33	0,1	0,07	T	T	1,53	0,0001	0,0022	T	NM_012093; NM_174858; ENST00000317704; ENST00000344720; ENST00000354567; ENST00000465146; ENST00000466114; ENST00000466393; ENST00000469394; ENST00000478255; ENST00000478407; ENST00000524494; ENST00000527263; ENST00000530826; ENST00000531672; BC033896; BC036666; OTTHUMT00000026992; OTTHUMT00000026993; OTTHUMT00000026994; OTTHUMT00000092213; OTTHUMT00000092214; OTTHUMT00000092215; OTTHUMT000000922…	AK5	adenylate kinase 5	Multiple_Complex
TC1100010410.hg.1	9,76	8,91	0,04	0,21	T	T	1,8	0,0001	0,0022	T	NM_001143805; NM_001143806; NM_001143807; NM_001143808; NM_001143809; NM_001143810; NM_001143811; NM_001143812; NM_001143813; NM_001143814; NM_001143816; NM_001709; NM_170731; NM_170732; NM_170733; NM_170734; NM_170735; ENST00000314915; ENST00000356660; ENST00000395978; ENST00000395980; ENST00000395981; ENST00000395983; ENST00000395986; ENST00000418212; ENST00000420794; ENST00000438929; ENST00000…	BDNF	brain-derived neurotrophic factor	Multiple_Complex
[truncated: 2,248 more rows]

## Sheet: Huh-7 OE TAC
Transcriptomic analysis of a Huh-7 transient overexpression of hsa_circ_0062682 (overexpression (2) vs. control (1))
[truncated: 1,019 more rows]
