# Supplementary material for: Circular RNA hsa_circ_0062682 Binds to YBX1 and Promotes Oncogenesis in Hepatocellular Carcinoma
Source: Cancers (Basel). 2022 Sep 19;14(18):4524. doi: 10.3390/cancers14184524 (PMC9497178; doi:10.3390/cancers14184524)
Supplement: Supplementary file 1 [file cancers-14-04524-s001.zip › Table S4.xlsx]

## Sheet: SNU-449 KD
Pathway enrichment analysis of transcriptome data from stable knockdown of hsa_circ_0062682 in SNU-449 as described in Reimand et al. 2019.
Cluster	Nodes
RNA transport	33
mitosis	27
cell cycle	23
viral processes	23
nucleotide excision repair	18
apoptosis	16
sterol and steroid metabolism	14
RNA metabolism	12
protein catabolic process	10
regulation chromatid separation	10
DNA repair	9
gene silencing	9
homology directed repair	9
RNA splicing	9
nuclear envelope organization	8
embryonic morphogenesis	7
regulation of cell cycle	7
SUMOylation	7
DNA replication	6
nucleosome organization	6
RNA polymerase III transcription	6
association replicative atr	5
defective progeroid type	5
extrinsic apoptotic pathway	5
snRNA transcription	5
tRNA processing	5
chromatin modification	4
E2F transcription	4
TP53 transcriptional regulation	4
ubiquitination	4
centriole assembly	3
endoderm formation	3
epithelial mesenchymal transition	3
heat stress response	3
import protein organelle	3
inositol phosphate metabolism	3
interferon alpha beta gamma	3
mRNA polyadenylation	3
negative cell proliferation	3
polysaccharide process carbohydrate	3
regulation of translation	3
S1P S1P2 S1P3 pathway	3
TRAIL signaling pathway	3
unfolded protein response	3
activation SREBP	2
androgen receptor pathway	2
ATM pathway	2
cellular cadmium ion	2
damage stimulus stress	2
DNA replication	2
FAS signaling	2
GPCR ligand binding	2
hallmark myc	2
Hippo signaling	2
inteferon production	2
Integrin pathway	2
intrinsic apoptotic pathway	2
protein oligomerization	2
response ionizing radiation	2
responses external stimuli	2
ribonucleoprotein subunit organization	2
SMAD 2 3 signalling	2
snRNP assembly	2
synapse organization assembly	2
TCPTP signaling	2
transcription RNA polymerase II promoter	2
actin filament based	1
adhesion membrane cell	1
BARD1 signaling	1
bZIP transcription	1
cd209 signaling	1
cellular response interleukin-1	1
endoplasmic reticulum organization	1
gamma carboxylation hypusine	1
glycosyl compound biosynthetic	1
hallmark androgen response	1
hallmark glycolysis	1
hallmark hypoxia	1
hallmark MTORC1	1
IL2RB pathway	1
integrins angiogenesis	1
interleukin signaling	1
metalloprotease dubs	1
microtubule based process	1
muscle contraction	1
negative regulation cell differentiation	1
nephrin family interactions	1
neural precursor cell	1
NGF	1
nls bearing protein	1
olfactory signaling pathway	1
platelet degranulation	1
positive regulation protein acetylation	1
protein localization chromosome	1
PTEN transcription	1
purine compound biosynthetic	1
RAF independent MAPK 1 3 activation	1
regulation cell division	1
regulation cell migration	1
regulation dna recombination	1
regulation endoplasmic reticulum	1
regulation glucokinase regulatory	1
regulation lipid metabolic	1
regulation muscle cell	1
regulation receptor binding	1
serine family amino	1
single organism membrane	1
SMAD2 SMAD3 SMAD4	1
TNFalpha	1
transcription RNA polymerase I promoter	1
zymogen activation	1

## Sheet: Huh-7 OE
Pathway enrichment analysis of transcriptome data from transient overexpression of hsa_circ_0062682 in Huh-7 as described in Reimand et al. 2019.
Cluster	Nodes
translation and amino acid metabolism	34
sterol and steorid metabolism	8
complement activation	7
epithelial cell differentiation	7
nucleobase catabolic process	6
plasma lipid remodeling	6
RNA splicing	6
terpenoid metabolism	6
plasma lipoprotein clearance	5
stem cell dvelopment	5
blood coagulation	4
golgi transport	4
GPCR ligand binding	4
sensory perception smell	4
unfolded protein response	4
blood circulation	3
glutathione derivative metabolism	3
insulin pathway	3
ncRNA metabolism	3
potassium channels	3
protein localization microtubules	3
sterol transport	3
amide metabolic process	2
ATF4 transcription	2
ATP metabolic process	2
ECM glycoproteins	2
fatty acid metabolism	2
hormone metabolic process	2
humoral immune response	2
ion channel transport	2
MYC pathway	2
nephrin pathway	2
regulation CDC42 pathway	2
regulation telomerase pid	2
response toxic substance	2
transcription RNA polymerase II promoter	2
YAP1 WWTR1	2
antimicrobial peptides	1
BARD1 pathway	1
cellular iron ion	1
cellular response external	1
digestion	1
diseases metabolism	1
ECM proteoglycans	1
ETS pathway	1
extracellular matrix organization	1
feeding behavior	1
G alpha signalling events	1
hallmark hypoxia	1
hallmark MYC	1
hallmark protein secretion	1
hats acetylate histones	1
interferon gamma production	1
mitochondrial protein import	1
neuropeptide signaling pathway	1
nitric oxide mediated	1
organelle biogenesis maintenance	1
organelle localization	1
peptidyl lysine modification	1
positive regulation cellular	1
regulation calcium ion	1
regulation cell morphogenesis	1
regulation cellular extravasation	1
regulation insulin growth	1
regulation natural killer cell	1
regulation spindle assembly	1
regulation system process	1
semaphorin interactions	1
small molecule catabolic	1
SUMOylation	1
