# Supplementary material for: Circular RNA hsa_circ_0062682 Binds to YBX1 and Promotes Oncogenesis in Hepatocellular Carcinoma
Source: Cancers (Basel). 2022 Sep 19;14(18):4524. doi: 10.3390/cancers14184524 (PMC9497178; doi:10.3390/cancers14184524)
Supplement: Supplementary file 1 [file cancers-14-04524-s001.zip › Table S5.xlsx]

## Sheet: Enriched pathways
Enrichr analysis of enriched pathways (KEGG database) of differentially expressed gene in SNU-449 KD by adjusted p-value ≤ 0.05
Term	Overlap	P-value	Adjusted P-value	Odds Ratio	Combined Score	Genes
TGF-beta signaling pathway	36/94	1.2012325539713846E-7	3.7718702194701474E-5	3.32	52.83	BMPR2	LTBP1	THBS1	PPP2R1B	MYC	E2F4	ACVR1	TGIF1	SMAD1	CREBBP	TGFB2	TGIF2	TGFB1	SMURF2	TGFB3	FST	NOG	INHBA	RGMB	SMAD6	ACVR2B	ACVR2A	BMP6	RBX1	TGFBR2	BMP5	GREM1	BMP4	RBL1	TFDP1	RPS6KB1	BAMBI	SP1	ID2	ID1	FBN1
Steroid biosynthesis	13/20	1.0186216597369142E-6	1.5992360057869552E-4	9.88	136.28	CYP51A1	DHCR24	MSMO1	HSD17B7	SQLE	EBP	NSDHL	CYP24A1	SOAT1	SC5D	DHCR7	LBR	FDFT1
Lysosome	40/128	1.037404518221178E-5	8.828564781913332E-4	2.43	27.85	SCARB2	CD63	ASAH1	IDUA	CLTB	LITAF	MFSD8	AP3M2	GGA2	CTSO	GNPTAB	LAMP1	AP1G1	CTSL	SMPD1	NEU1	ATP6V0A2	SLC17A5	CTSH	IDS	AP4S1	AP1S3	AGA	CTSD	CTSC	HGSNAT	MANBA	ENTPD4	SORT1	FUCA1	FUCA2	M6PR	AP3D1	AP3B1	IGF2R	NPC1	PPT2	CD68	ATP6V0C	GLA
Cell cycle	39/124	1.1246579340016983E-5	8.828564781913332E-4	2.45	27.91	ANAPC13	CDKN1A	PCNA	CDC14A	ORC4	FZR1	ORC6	CDC45	CCND1	CHEK2	MYC	CDC27	ORC2	ABL1	E2F4	BUB1	YWHAH	CREBBP	TGFB2	TGFB1	CDKN2C	ANAPC7	TGFB3	CDC6	CDC25A	CDC25B	RBX1	CDK7	DBF4	RBL1	TFDP1	CDC16	MDM2	MCM3	ANAPC5	MCM5	MCM6	ANAPC1	MAD2L1
FoxO signaling pathway	40/131	1.9092586170316204E-5	0.0010360546769965803	2.35	25.5	CDKN1A	PRKAA2	PRKAG1	PRKAG2	IRS2	PIK3R2	PIK3CB	NLK	STK4	FOXO1	GABARAP	EGFR	IGF1R	IKBKB	STK11	MAPK8	CCND1	TNFSF10	GABARAPL2	PRKAB2	CREBBP	TGFB2	MAP2K2	TGFB1	HOMER1	CHUK	TGFB3	BNIP3	FBXO32	SOD2	PRKAB1	TGFBR2	MAPK10	IL6	G6PC3	CCNG2	MDM2	SGK3	IL7R	SGK2
Proteoglycans in cancer	56/205	1.979722312732319E-5	0.0010360546769965803	2.01	21.76	CDKN1A	ITGB5	PIK3CB	IGF1R	PPP1CC	CCND1	CTSL	PLAU	MYC	CASP3	ITGAV	VAV3	MAP2K2	WNT5B	MMP2	WNT5A	GAB1	PLAUR	ANK2	FRS2	PRKCA	ANK3	HSPG2	MRAS	TLR4	MET	CD44	CD63	SDC4	PXN	TWIST1	ITPR2	PIK3R2	THBS1	EGFR	CDC42	ERBB4	PLCG2	FLNA	DROSHA	FZD1	TGFB2	TGFB1	FZD5
MAPK signaling pathway	74/294	2.4014197378214807E-5	0.001077208282394207	1.8	19.16	PTPRR	CSF1	TRADD	RASGRF1	ARRB1	ARRB2	FGF1	AREG	DUSP16	CRKL	IGF1R	ELK4	IKBKB	FGF5	PPP3CA	RPS6KA5	DUSP10	MYC	CASP3	MAP3K5	DUSP4	DUSP5	DAXX	DUSP3	MAP2K2	CHUK	IL1R1	DUSP1	PRKCA	IRAK4	DUSP8	DUSP6	EREG	CDC25B	TGFBR2	MRAS	RASA1	RASA2	MAPKAPK5	MET	ATF4	EPHA2	PDGFA	CACNA1A
AGE-RAGE signaling pathway in diabetic complications	32/100	4.562598695676262E-5	0.0017908199880529328	2.51	25.08	SERPINE1	PIK3R2	PIK3CB	FOXO1	ICAM1	CDC42	MAPK8	CCND1	CASP3	PIM1	PLCG2	CCL2	TGFB2	TGFB1	TGFB3	PRKCE	MMP2	FN1	PRKCA	F3	AGT	TGFBR2	VEGFA	COL1A1	MAPK10	IL6	COL3A1	PLCB4	COL4A2	COL4A1	COL4A6	COL4A5
Pathways in cancer	118/531	6.357236439771587E-5	0.0022179691578758645	1.53	14.82	HHIP	ITGA2B	CALML4	FGF1	ETS1	CRKL	IGF1R	FGF5	RPS6KA5	CCND1	MYC	PIM1	PIM2	IFNAR2	MAP2K2	IL4R	WNT5B	DAPK1	F2R	WNT5A	PRKCA	MITF	RBX1	BCR	EML4	AR	MSH2	COL4A2	COL4A1	COL4A6	COL4A5	MGST3	LPAR1	MGST1	PDGFA	LPAR2	MGST2	LPAR3	PIK3R2	STK4	FOXO1	HSP90B1	RASGRP3	GNG10
TNF signaling pathway	34/112	8.857306381892907E-5	0.0027811942039143727	2.32	21.69	CXCL6	CSF1	ATF6B	TRADD	TNFAIP3	PIK3R2	CXCL1	PIK3CB	CXCL5	ICAM1	IKBKB	MAPK8	RPS6KA5	CASP8	CASP3	CREB3L2	CCL2	JUNB	MAP3K5	MAP2K6	MLKL	CHUK	CCL20	DAB2IP	TRAF1	NFKBIA	MAPK10	IL6	MMP14	TRAF3	TRAF5	ATF4	BIRC3	CREB5
Circadian rhythm	14/31	1.1273686292797384E-4	0.003218124996307617	4.38	39.81	PRKAB2	PRKAA2	BHLHE41	PRKAG1	PRKAG2	PRKAB1	NPAS2	ARNTL	RBX1	PER2	PER1	CRY2	FBXL3	CLOCK
PI3K-Akt signaling pathway	82/354	1.983286516183723E-4	0.0051895997173474085	1.61	13.76	CDKN1A	CSF3	CSF1	ITGB5	ITGA2B	LAMC2	BRCA1	PIK3CB	FGF1	AREG	IGF1R	IKBKB	RPTOR	FGF5	STK11	PPP2R1B	CCND1	MYC	CREB3L2	MYB	MLST8	ITGAV	ITGB6	YWHAH	IFNAR2	MAGI1	IL4R	MAP2K2	CHUK	F2R	PRKCA	EREG	COL4A2	COL4A1	COL6A2	DDIT4	COL6A1	COL4A6	COL4A5	COL6A3	SGK3	ITGA6	SGK2	TLR4
Insulin resistance	32/108	2.3122846309801218E-4	0.005585056724059679	2.24	18.79	PRKAA2	PRKAG1	SLC2A1	PRKAG2	SLC2A2	IRS2	PIK3R2	PIK3CB	FOXO1	IKBKB	PPP1CC	MAPK8	CREB3L2	MLX	CD36	PPARGC1A	PRKAB2	PRKCE	GFPT2	NR1H2	GFPT1	PTPN11	PRKAB1	AGT	NFKBIA	MAPK10	IL6	G6PC3	RPS6KB1	PPP1R3B	PPP1R3E	CREB5
Autophagy	38/137	2.863168629874088E-4	0.006262173018095918	2.05	16.7	BECN1	PRKAA2	IRS2	PIK3R2	PIK3CB	ZFYVE1	GABARAP	IGF1R	RPTOR	STK11	MAPK8	DEPTOR	LAMP1	CTSL	MLST8	SUPT20H	ATG7	CTSD	SNAP29	GABARAPL2	UVRAG	MAP2K2	DAPK1	BNIP3	ATG9A	EIF2AK3	EIF2S1	MAPK10	MRAS	RRAGC	RPS6KB1	RRAGB	DDIT4	RRAGD	ULK2	RAB7B	BCL2L1	ATG4D
Apoptosis	39/142	2.991483925841999E-4	0.006262173018095918	2.02	16.38	BECN1	DIABLO	TRADD	ITPR2	PIK3R2	PIK3CB	IKBKB	CTSO	MAPK8	CASP8	CASP6	CTSL	CASP3	TNFSF10	PMAIP1	CASP2	CTSH	BID	CTSD	CTSC	MAP3K5	DAXX	MAP2K2	APAF1	CHUK	EIF2AK3	DAB2IP	TNFRSF10B	TNFRSF10A	TRAF1	PTPN13	EIF2S1	TUBA4A	NFKBIA	MAPK10	ATF4	BCL2L1	TUBA8	BIRC3
Tight junction	44/169	4.602200867168602E-4	0.009031819201818381	1.88	14.43	PCNA	PRKAA2	ARPC1A	PRKAG1	NEDD4L	PRKAG2	GATA4	MYL6B	CLDN2	CDC42	STK11	MAPK8	PARD6B	RAP1A	CCND1	PPP2R1B	CLDN23	SYNPO	CGNL1	JAM2	MAP3K5	MAGI1	PRKAB2	PRKCI	MAP3K1	MPP4	PRKCE	PRKAB1	TUBA4A	TJAP1	MAPK10	TJP1	MYL6	DLG1	OCLN	ARPC3	PARD3	NEDD4	MYH9	AMOTL1	NF2	CLDN16	MYL9	TUBA8
Mitophagy	22/68	5.657454334801015E-4	0.010449650947808933	2.55	19.03	GABARAPL2	BECN1	BNIP3	ATG9A	EIF2AK3	MITF	GABARAP	MAPK10	MAPK8	PINK1	MRAS	UBB	SP1	NBR1	MFN2	USP30	RAB7B	TBC1D17	OPTN	TBC1D15	ATF4	BCL2L1
Mineral absorption	20/60	6.461021777757943E-4	0.011110219408667297	2.66	19.54	SLC34A2	VDR	MT1M	SLC40A1	ATP2B4	ATP1A3	MT1X	ATP1A2	ATP1A1	ATP2B1	ATOX1	MT2A	MT1A	MT1F	MT1G	MT1H	MT1B	STEAP1	STEAP2	MT1E
Adipocytokine signaling pathway	22/69	7.07657287176261E-4	0.011110219408667297	2.49	18.07	PRKAB2	PRKAA2	CHUK	ACSL1	TRADD	PRKAG1	SLC2A1	PRKAG2	IRS2	ACSL4	PTPN11	ADIPOR1	PRKAB1	IKBKB	MAPK10	NFKBIA	STK11	MAPK8	G6PC3	LEPR	CD36	PPARGC1A
Renal cell carcinoma	22/69	7.07657287176261E-4	0.011110219408667297	2.49	18.07	ARNT2	CDKN1A	FH	CREBBP	EGLN3	TGFB2	MAP2K2	TGFB1	TGFB3	SLC2A1	GAB1	PIK3R2	PTPN11	PIK3CB	ETS1	CRKL	RBX1	VEGFA	CDC42	RAP1A	MET	PAK4
Small cell lung cancer	27/92	8.08610534653914E-4	0.012090652756253761	2.21	15.75	CDKN1A	ITGA2B	LAMC2	PIK3R2	PIK3CB	IKBKB	CCND1	CASP3	MYC	ITGAV	POLK	APAF1	CHUK	FN1	LAMB1	TRAF1	NFKBIA	COL4A2	COL4A1	TRAF3	TRAF5	COL4A6	COL4A5	RARB	ITGA6	BIRC3	BCL2L1
ECM-receptor interaction	26/88	8.967983922583439E-4	0.012799758871323636	2.23	15.66	ITGB5	SDC4	ITGA2B	LAMC2	HMMR	THBS2	THBS1	ITGAV	CD36	ITGB6	FN1	LAMB1	NPNT	HSPG2	COL1A1	COL4A2	COL4A1	COL6A2	ITGA10	COL6A1	COL4A6	COL4A5	COL6A3	SDC1	ITGA6	CD44
Malaria	17/50	0.0012517888298373045	0.01708963880734407	2.74	18.31	CSF3	TGFB2	TGFB1	GYPC	LRP1	TGFB3	HBB	THBS2	THBS1	ICAM1	IL6	KLRC4-KLRK1	CCL2	SDC1	CD36	MET	TLR4
Hippo signaling pathway	41/163	0.0014543609104345563	0.019027888578185447	1.79	11.7	BMPR2	SERPINE1	FGF1	LIMD1	AREG	GLI2	PPP1CC	PARD6B	RASSF2	CCND1	PPP2R1B	RASSF4	MYC	TP53BP2	TEAD1	TEAD2	YWHAH	FZD1	SMAD1	PRKCI	TGFB2	TGFB1	WNT5B	FZD5	TGFB3	WNT5A	FZD6	BMP6	BMP5	TGFBR2	BMP4	MOB1B	MOB1A	DLG1	PARD3	ID2	ID1	SNAI2	CTNNB1	NF2	BIRC3
Fluid shear stress and atherosclerosis	36/139	0.0015905557334918666	0.019638419934661352	1.86	12	BMPR2	PRKAA2	SDC4	MGST3	ITGA2B	MGST1	MGST2	PDGFA	PIK3R2	CALML4	PIK3CB	ICAM1	HSP90B1	IKBKB	MAPK8	CTSL	SUMO3	CCL2	ITGAV	MAP3K5	MAP2K6	ACVR1	GSTM4	NQO1	CHUK	IL1R1	DUSP1	MMP2	ACVR2B	ACVR2A	ASS1	VEGFA	BMP4	MAPK10	SDC1	CTNNB1
p53 signaling pathway	22/73	0.0016261112047808765	0.019638419934661352	2.29	14.74	CDKN1A	CD82	APAF1	IGFBP3	EI24	SERPINE1	TNFRSF10B	TNFRSF10A	PPM1D	THBS1	CASP8	CCND1	AIFM2	CASP3	CHEK2	CCNG2	MDM2	PMAIP1	MDM4	BID	GTSE1	BCL2L1
Focal adhesion	48/201	0.0019815807463086947	0.02304505016077519	1.67	10.41	ITGB5	ITGA2B	PXN	RASGRF1	PDGFA	PIK3R2	LAMC2	PIK3CB	ARHGAP5	THBS2	THBS1	EGFR	CRKL	IGF1R	CDC42	PPP1CC	MAPK8	RAP1A	CCND1	PDGFC	PIP5K1A	FLNA	ITGAV	PIP5K1C	ITGB6	PAK4	VAV3	FN1	PRKCA	LAMB1	VEGFA	COL1A1	MAPK10	COL4A2	COL4A1	ITGA10	COL6A2	COL6A1	ZYX	COL4A6	CTNNB1	COL4A5	COL6A3	ITGA6
Valine, leucine and isoleucine degradation	16/48	0.0021767745167907884	0.024410971366868126	2.66	16.29	ACAD8	HMGCS1	MCCC1	HSD17B10	AACS	ACAT2	HADHA	ALDH1B1	AUH	EHHADH	IVD	ACADM	HADH	BCAT1	HIBCH	BCAT2
Axon guidance	44/182	0.002313995458455656	0.025054985308795723	1.7	10.31	NRP1	ROBO3	BMPR2	SEMA3C	SEMA3A	NTN4	CXCR4	PIK3R2	SEMA3E	PIK3CB	GNAI1	ROBO1	CDC42	PPP3CA	ABLIM1	PARD6B	ABLIM3	BOC	ABL1	PLCG2	PLXNA1	SLIT3	NCK1	PAK4	EPHA5	WNT5B	TRPC4	PTCH1	TRPC1	WNT5A	NFATC3	PRKCA	PTPN11	L1CAM	SSH2	RHOD	EFNA1	ENAH	CDK5	PARD3	RASA1	MYL9	MET	EPHA2
Kaposi sarcoma-associated herpesvirus infection	46/193	0.0025251423697868207	0.0261667468810448	1.67	9.98	BECN1	CDKN1A	TRADD	ITPR2	PIK3R2	CXCL1	CALML4	PIK3CB	GABARAP	PIK3R6	ICAM1	C3	IKBKB	PREX1	PPP3CA	GNG10	MAPK8	CASP8	CCND1	UBB	GNG4	MYC	CASP3	PLCG2	BID	MICB	MAP2K6	IFNAR2	GABARAPL2	CREBBP	MAP2K2	CHUK	IFNGR1	STAT2	NFATC3	GNG12	VEGFA	NFKBIA	MAPK10	IL6	CLEC2B	TRAF3	GNB4	CTNNB1
Human T-cell leukemia virus 1 infection	51/219	0.0025833412525872257	0.0261667468810448	1.62	9.64	NRP1	CDKN1A	CRTC3	SLC2A1	PIK3CB	ETS1	ICAM1	ELK4	IKBKB	PPP3CA	KAT5	CCND1	CHEK2	MYC	CDC27	CREB3L2	B2M	MAP2K2	MMP7	ANAPC7	CHUK	IL1R1	TGFBR2	KAT2B	ANAPC5	SLC25A4	ANAPC1	ATF4	CREB5	ATF6B	PIK3R2	MAPK8	RANBP1	CREBBP	TGFB2	CDKN2C	MAP3K1	TGFB1	NFYB	TGFB3	NFATC3	FOSL1	NFKBIA	MAPK10
Lipid and atherosclerosis	50/215	0.0029110821767123866	0.028564993858990292	1.62	9.43	CXCL1	CALML4	VLDLR	PIK3CB	ICAM1	IKBKB	PPP3CA	CASP8	CASP6	CASP3	TNFSF10	OLR1	CD36	MAP3K5	VAV3	APAF1	CHUK	MMP1	PRKCA	IRAK4	PLCB4	TRAF3	PPARG	TLR6	TLR4	ATF4	PIK3R2	HSP90B1	CDC42	MAPK8	RAP1A	IRAK1	CCL2	BID	MAP2K6	POU2F1	EIF2AK3	NFATC3	TNFRSF10B	TNFRSF10A	HSPA2	POU2F2	SOD2	EIF2S1
Cellular senescence	38/156	0.003845385448105311	0.036589425172880836	1.72	9.54	CDKN1A	SERPINE1	ITPR2	GATA4	PIK3R2	CALML4	PIK3CB	LIN9	FOXM1	ETS1	FOXO1	PPP1CC	PPP3CA	CCND1	RBBP4	CHEK2	MYC	MYBL2	E2F4	MAP2K6	LIN52	TGFB2	MAP2K2	TGFB1	TGFB3	IGFBP3	NFATC3	HIPK1	CDC25A	TGFBR2	IL6	MRAS	RBL1	MDM2	RAD9B	SLC25A4	PPID	RAD9A
Rap1 signaling pathway	48/210	0.004954486077921797	0.04575613613139541	1.58	8.38	DOCK4	RALB	CSF1	ITGA2B	FPR1	LPAR1	LPAR2	PDGFA	LPAR3	PIK3R2	CALML4	PIK3CB	SIPA1L2	FGF1	THBS1	EGFR	GNAI1	CRKL	IGF1R	RASGRP3	FGF5	CDC42	GRIN2A	PARD6B	RAP1A	PDGFC	MAP2K6	VAV3	MAGI1	PRKCI	MAP2K2	F2R	PRKCA	VEGFA	APBB1IP	ENAH	EFNA1	KITLG	MRAS	PLCB4	PARD3	ID1	CTNNB1	EVL
[truncated: 74 more columns]

## Sheet: Enriched transcription factors
Enrichr analysis of enriched transcription factors (TRRUST database) of differentially expressed gene in SNU-449 KD by adjusted p-value ≤ 0.05
Term	Overlap	P-value	Adjusted P-value	Odds Ratio	Combined Score	Genes
E2F1 human	48/134	1.2966874496676977E-8	6.69090724028532E-6	2.99	54.26	TOP2A	ISYNA1	CDKN1A	ABCB1	PCNA	ZNF350	MCM8	SERPINE1	CDCA7	BRCA1	FOXM1	TYMS	THBS1	RNF2	AURKB	NPAT	MAPK8	DRAM1	CCND1	RACGAP1	CUX1	CHEK2	MYC	MYB	NRIP1	TP53INP1	TP53BP2	DROSHA	MYBL2	ECT2	MAP3K5	FZD1	CREBBP	APAF1	DUSP1	FANCA	HMGA1	CDC6	CD2AP	PNRC2	VEGFA	AR	DBF4	MDM2
SP1 human	119/472	8.645711380885102E-8	2.2305935362683565E-5	1.82	29.55	OXTR	SERPINE1	IRS2	CTGF	ICAM1	IGF1R	STK11	CDH2	CCND1	PLAU	MYC	TNFSF10	CYP1B1	SLC39A8	IGFBP1	CXADR	IGFBP4	LMO4	PRKCE	IGFBP3	F2R	ADAM10	CD2AP	CYP27A1	AR	POR	PADI3	KCNQ3	HOXB7	ABCG2	ABCB1	CBFB	CREM	FXR2	PDGFC	SLC19A3	APOE	NDUFV1	CD99	TGFB1	VDR	TFPI2	HMGA1	TNFRSF10B
EZH2 human	20/40	5.270659742184291E-7	9.06553475655698E-5	5.33	77	IGFBP1	CDKN1A	PCNA	VDR	MMP2	RPLP0	PEBP1	TWIST1	BRCA1	HOXB13	FBXO32	RUNX3	SFRP1	CCND1	ADAMTS1	AXL	MYC	POLR3D	SNAI2	PIP5K1C
NFKB1 human	79/303	3.1951984856301966E-6	3.9231371821767054E-4	1.89	23.93	SERPINA3	CDKN1A	CSF1	SERPINE1	TNFAIP3	CXCL1	CXCL5	ICAM1	RGS4	CCND1	PLAU	MYC	CASP3	NFKBIZ	TNFSF10	ADORA1	OLR1	CCR7	UPP1	B2M	JUNB	IER3	MMP1	MMP2	TRPC1	PLAUR	PROX1	TRAF1	F3	TAPBP	BACE1	NCOR2	AR	CEACAM1	MMP14	CYP2E1	OPTN	TLR3	ABCG2	BIRC3	PTGFR	ABCB1	CFI	STK39
TP53 human	49/164	4.630002507173862E-6	3.9231371821767054E-4	2.28	27.98	BTG3	CDKN1A	CD82	SLC2A1	BRCA1	FOXM1	ANTXR1	IGF1R	GLI2	CCND1	CHEK2	MYC	CASP3	CTSD	IER3	APAF1	CHUK	DUSP1	MMP1	IGFBP3	MMP2	PRKAB1	DKK1	RAD51B	FRMD5	CRYAB	MET	EPHA2	ABCB1	TYMS	THBS1	EGFR	IFI16	GPNMB	PMAIP1	PPARGC1A	TNFRSF10B	CABLES1	TNFRSF10A	PTPN13	PML	VEGFA	ID2	TBXAS1
STAT3 human	44/142	4.921186524264782E-6	3.9231371821767054E-4	2.4	29.32	LGALS3BP	CDKN1A	FGL1	TWIST1	PRDM1	TRH	FGF1	NLK	NR2C2	LTBP1	CYR61	EGFR	CTGF	ICAM1	AKAP12	STK11	MUC1	CCND1	CSRP1	MYC	PIM1	CCL2	JUNB	TP63	TGFB1	POU2F1	MMP7	VDR	MMP1	MMP2	F2R	FGG	TNFRSF10B	PTPN13	ETV6	VEGFA	AR	IL6	MMP14	OAS1	CHI3L1	ROR1	CFB	BCL2L1
HIF1A human	30/83	5.322085324658322E-6	3.9231371821767054E-4	3.02	36.66	ABCB1	PFKFB3	TFRC	SERPINE1	SLC2A1	TWIST1	CXCR4	CTGF	MUC1	NT5E	CCND1	TUBB3	PLAU	CCR7	BID	ARNT2	EGLN3	TGFB3	MMP2	BNIP3	SDHB	ASS1	VEGFA	AR	ACE2	LOX	ERCC2	ZNF217	TLR6	MET
HOXB7 human	8/10	1.330422629107913E-5	8.581225957746039E-4	21.25	238.56	CCND1	DAPK1	MMP2	WNT5A	PDGFA	THBS2	EGFR	VEGFA
RELA human	76/301	1.6704051864499818E-5	9.345663455149807E-4	1.81	19.9	SERPINA3	OXTR	CDKN1A	CSF1	SERPINE1	TNFAIP3	CXCL1	CXCL5	ICAM1	RGS4	CCND1	PLAU	MYC	CASP3	NFKBIZ	TNFSF10	ADORA1	OLR1	CCR7	UPP1	JUNB	IER3	MMP1	MMP2	TRPC1	PLAUR	PROX1	TRAF1	F3	TAPBP	BACE1	NCOR2	AR	CEACAM1	MMP14	CYP2E1	OPTN	TLR3	ABCG2	BIRC3	PTGFR	ABCB1	CFI	STK39
TRP53 mouse	48/167	1.811175088207327E-5	9.345663455149807E-4	2.15	23.53	CDKN1A	PCNA	EI24	SERPINE1	FPR1	FOXM1	TYMS	THBS1	IGF1R	GLIPR1	CASP8	CASP6	SIN3A	EPCAM	MYC	CASP3	PCBP2	PMAIP1	POLK	UPP1	GABRE	GTSE1	EDIL3	DUSP4	ABCC1	CDKN2C	APAF1	DUSP1	MMP2	TNFRSF10B	PROX1	KLF4	SOD2	AGT	PML	PER2	KRT19	CDK5	AXL	PAPPA	PSME3	ID2	DDIT4	MDM2
WT1 human	22/57	2.885585970206921E-5	0.0013536021460243373	3.35	34.99	CDKN1A	ABCB1	WTAP	VDR	DNMT3A	ODC1	PDGFA	ETS1	THBS1	CDC73	EGFR	CTGF	IGF1R	EREG	VEGFA	AR	ADGRE5	MYC	MYB	SNAI2	SRY	JUNB
ATM human	12/22	3.38267176476057E-5	0.001454548858847045	6.38	65.67	CDKN1A	PCNA	DUSP1	SP1	MTF1	APLF	SLC2A1	TNFRSF10B	PMAIP1	FOXM1	IGF1R	VEGFA
HDAC1 human	25/71	5.231946386705128E-5	0.002076680258107574	2.89	28.54	CDKN1A	PCNA	ABCB1	CD82	EGFR	ICAM1	CCND1	EPCAM	MICB	HMGCS1	IGFBP3	TNFRSF10A	KLF4	RUNX3	POU5F1	TJP1	AR	SFRP1	SP1	BAMBI	RARB	TXNIP	SNAI2	CD44	BIRC3
NCOA3 mouse	7/9	6.751443268633312E-5	0.002488389090439135	18.59	178.48	NFKBIA	IGFBP3	PPARG	KLF4	CLOCK	NPAS2	TBX3
SMAD3 mouse	19/49	9.258451643421583E-5	0.0031849073653370244	3.37	31.3	TAGLN	CXADR	RIF1	DAPK1	SERPINE1	FN1	RUNX2	CTGF	VEGFA	OCLN	PLAU	MYC	PSME3	SNAI1	ENPP1	CCL2	PPARG	PPARGC1A	TPT1
RB1 human	14/31	1.1273686292797384E-4	0.0036357638294271565	4.38	39.81	CDKN1A	PCNA	DNMT3A	BRCA1	VEGFA	ELF1	RBL1	TFDP1	SP1	MYC	TP53BP2	PPARG	TGFBI	MAP3K5
NFKB1 mouse	52/200	1.5419275192694537E-4	0.004680203529076695	1.88	16.47	CDKN1A	BMPR2	CSF1	SLC2A1	TNFAIP3	CXCL1	IKBKB	CCND1	PPP1R13L	MYC	MYB	NFKBIZ	ADORA1	UPP1	JUNB	CXADR	DUSP1	MMP2	PLAUR	TAPBP	MMP14	BIN1	TLR4	CFB	BIRC3	STK39	TWIST1	HMGCR	PPM1D	EGFR	PMAIP1	CCL2	HES1	APOE	IGF2BP2	PPARGC1A	NQO1	TGFB1	CCL20	FN1	SOD2	AGT	VEGFA	COL1A1
TWIST2 human	12/25	1.7043365508988568E-4	0.00488576477924339	4.91	42.57	SRPX	RAP1A	CDH2	MMP2	MYB	F2R	FN1	PFDN4	DKK1	RUNX2	CD44	ICAM1
ESR1 human	25/76	1.8333007902113064E-4	0.004970817246434648	2.61	22.46	CDKN1A	SERPINE1	BRCA1	TYMS	EGFR	CCND1	MYC	CYP1B1	PMAIP1	CTSD	JUNB	MICB	NQO1	RUNX2	FOXP1	VEGFA	AR	KRT19	NR5A2	SP1	CYP1A1	MDM2	CTNNB1	CD24	ABCG2
SNAI1 human	7/10	1.9400609663648442E-4	0.004970817246434648	12.39	105.9	CXADR	CDH2	VDR	FN1	SNAI1	PEBP1	THBS1
AHR human	11/22	2.0230070188978215E-4	0.004970817246434648	5.31	45.2	MT2A	IL6	PCNA	UGT1A1	CCND1	CCNG2	MYC	CYP1A1	CYP1B1	BRCA1	ABCG2
LEF1 human	13/29	2.168648949117721E-4	0.0050864675352033815	4.32	36.44	MYCBP	MMP7	MITF	CLDN2	AR	CYLD	NT5E	CCND1	MYC	SNAI2	CTNNB1	TCF4	TCF3
E2F1 mouse	18/49	3.1178037967966634E-4	0.0069947250397699055	3.09	24.94	NRP1	CDKN1A	TGFB2	PCNA	CDKN2C	APAF1	MCM8	HMGA1	MERTK	TAPBP	VEGFA	NPAT	CCND1	BIN1	TK1	BID	TLR3	TPT1
EGR1 human	27/88	3.738153433373646E-4	0.00803702988175334	2.36	18.6	CDKN1A	ABCB1	AKR1B1	EGFR	CCND1	PLAU	MYB	PDGFC	TNFSF10	GGPS1	TFPI2	PLAUR	FN1	LMTK2	F3	TGFBR2	VEGFA	AR	MMP14	POR	IL6	FAP	PPARG	SPRY1	TCF4	HPSE	EAPP
HDAC2 human	12/27	4.1759965584630115E-4	0.008619256896667656	4.25	33.08	CDKN1A	APAF1	SP1	MYC	TNFSF10	TWIST1	CCL2	SNAI2	KLF4	TP63	VEGFA	TGFBR2
FOXM1 human	9/17	4.542077994083107E-4	0.00901427786518032	5.98	45.99	FGB	AR	KRT15	MYC	CDC6	APOE	CDC25A	CDC25B	VEGFA
SP1 mouse	63/270	8.392346269513234E-4	0.015399367930860355	1.63	11.51	NRP1	SCARB1	CDKN1A	CSF1	SERPINE1	SLC2A1	TNFAIP3	ETS1	ICAM1	CSRP2	CCND1	MYC	MYB	PHGDH	SH3GL1	GSTK1	ABCC1	CXADR	IGFBP3	MMP2	PLAUR	ACSL4	RUNX2	POU5F1	TGFBR2	BACE1	AR	ITGA6	MGARP	SLC25A4	MET	ASAH1	MGST1	HMGCR	TYMS	EGFR	ARNTL	ATXN3	MFN2	CCL2	DMD	APOE	SKIL	TFAP2C
JUN human	39/149	8.398166052828663E-4	0.015399367930860355	1.89	13.38	BECN1	OXTR	CDKN1A	RARG	ABCB1	CD82	CSF1	CREM	BRCA1	ETS1	EGFR	CTGF	LGALS3	MAPK8	CCND1	HEY1	PLAU	CTSL	MYC	MYB	CCL2	NQO1	BATF3	MMP7	MAP3K1	VDR	MMP1	MMP2	PLAUR	TNFRSF10A	SOD2	F3	RUNX2	VEGFA	FOSL1	AR	IL6	RARB	BCL2L1
HIC1 human	6/9	8.654683527033921E-4	0.015399367930860355	10.62	74.87	MYC	ACKR3	VLDLR	LRP8	EPHA2	VEGFA
SNAI1 mouse	12/29	9.145885981856316E-4	0.015730923888792863	3.75	26.25	TJP1	OCLN	CXADR	NR5A2	MMP15	MMP2	ID1	FN1	SNAI1	CTNNB1	PHGDH	RUNX2
MYCN human	16/45	0.0010002368154672688	0.015991944528375	2.93	20.26	CDKN1A	ABCC1	ABCB1	MCM8	HMGA1	MCM10	CLU	ID2	TP53INP1	MCM3	MDM2	MYBL2	MCM5	MCM6	CTSD	CD44
CTNNB1 human	10/22	0.0010227406384425873	0.015991944528375	4.43	30.48	AR	MMP14	MMP7	CCND1	GLCE	FST	MYC	CLDN2	CD44	GLI2
REL human	10/22	0.0010227406384425873	0.015991944528375	4.43	30.48	CDKN1A	IL6	CSRP1	TNFAIP3	CCL2	SOD2	F3	ICAM1	BIRC3	IER3
JUND human	13/34	0.001361034335950283	0.020655697569127822	3.29	21.71	NQO1	CDKN1A	TGFB1	PLAUR	CLU	F3	FOSL1	IL6	CCND1	MYB	MDM2	ITGAV	SOX4
GTF2I mouse	8/16	0.0015451381299800818	0.022779750716277775	5.31	34.37	AKAP12	TGFB2	CFDP1	CSRP2	CCND1	ID1	DLK1	TGFBR2
CREB1 mouse	12/31	0.001826293971391228	0.025858087601664394	3.36	21.16	SLC20A1	NOCT	PRKCE	PDE3B	NFKBIZ	TWIST1	MITF	ACSL4	NMNAT2	PPM1D	ETV3	PPARGC1A
TWIST1 human	13/35	0.001854165196243377	0.025858087601664394	3.14	19.75	SRPX	MMP1	MMP2	F2R	FN1	DKK1	RUNX2	ICAM1	RAP1A	CDH2	MYB	PFDN4	CD44
USF1 human	20/65	0.001971191543769794	0.026766706225926678	2.36	14.72	TGFB2	TGFB1	POU2F1	SLC16A1	SERPINE1	CXCR4	FMO3	TYMS	AGT	EXT1	CEACAM1	LIPC	TCN2	CEACAM5	SCN9A	CYP1A1	MYH9	B2M	CTSD	HOXB7
AR human	26/93	0.0021596310849923738	0.028573580509129868	2.07	12.68	CDKN1A	PEBP1	HMMR	EGFR	IGF1R	ELK4	MUC1	CDH2	IFI16	TRPS1	MYC	PMEPA1	MED1	ARG2	IGFBP3	FN1	ETV1	CDC6	CYP7B1	GTF2F1	PNRC1	CLK3	VEGFA	TJP1	KLF5	CTNNB1
FOXO1 human	10/24	0.0022881933793191984	0.02951769459321766	3.79	23.07	IGFBP1	AR	IL6	TNFSF10	PDGFA	CXCR4	TXNIP	IRS2	ADIPOR1	NLK
PPARG human	20/66	0.0024131000478776568	0.030369746944021243	2.31	13.94	CDKN1A	POU2F1	CSF1	MMP1	SERPINE1	VLDLR	CLDN2	FGF1	KLF4	SAT1	EGFR	ICAM1	CCND1	MYC	RARB	TXNIP	CD36	PDK2	ABCG2	BCL2L1
HMGA1 human	8/17	0.002514857624862135	0.03089682224830623	4.72	28.25	SP1	XPA	TWIST1	CXCL1	BRCA1	CRYAB	CDC25A	CD44
TFAP2A human	21/71	0.0026456815083023525	0.03174817809962823	2.23	13.26	CDKN1A	KLF12	CD82	IGFBP5	CRABP2	GALNT3	MMP2	F2R	PLAUR	PRKCA	LNPEP	L1CAM	SOD2	ETS1	EGFR	SNAP91	VEGFA	BACE1	COL1A1	SPRY2	CRYAB
HIF1A mouse	9/21	0.0030031804065098473	0.034644202343823816	3.98	23.13	BACE1	CREBBP	PFKFB3	HEY1	MDK	SERPINE1	SNAI1	VEGFA	CTGF
SNAI2 human	7/14	0.0030777723650971148	0.034644202343823816	5.31	30.7	CXADR	CDH2	VDR	LPAR2	CXCR4	POU5F1	CD44
MYC human	27/100	0.003088436643054061	0.034644202343823816	1.97	11.38	CDKN1A	PCNA	TFRC	CBFB	ODC1	CDCA7	CXCR4	GATA4	FOXM1	CCND1	CHEK2	IGF2BP1	PMAIP1	BRD7	JUNB	IER3	DDX18	CREBBP	MME	UBE2C	TNFRSF10B	DKK1	ASS1	VEGFA	SFRP1	IL6	ID2
PGR human	10/25	0.0032769611870281518	0.035227332760552635	3.54	20.26	IGFBP1	CCND1	DUSP1	MYC	HLTF	RLN2	IRS2	EGFR	VEGFA	ABCG2
SRF human	10/25	0.0032769611870281518	0.035227332760552635	3.54	20.26	FOSL1	TAGLN	MMP14	HMGXB4	PLAU	MMP2	SERPINE1	DMD	MYL9	KPNA1
NCOA1 mouse	6/11	0.0035677294240596467	0.03591026885925145	6.37	35.9	NFKBIA	AR	CDKN1A	PSAT1	TWIST1	GATA4
KLF8 human	5/8	0.00368845784794637	0.03591026885925145	8.84	49.55	SLC22A3	MMP14	CDH2	FN1	EPSTI1
MYBL2 human	5/8	0.00368845784794637	0.03591026885925145	8.84	49.55	COL1A1	CCND1	SP1	MYC	MYBL2
POU4F1 mouse	5/8	0.00368845784794637	0.03591026885925145	8.84	49.55	CDKN1A	SYT1	PMAIP1	RUNX3	BCL2L1
RBMX human	5/8	0.00368845784794637	0.03591026885925145	8.84	49.55	FOSL1	JUND	TXNIP	JUNB	ROS1
EP300 mouse	18/60	0.004379556173757082	0.041849092327012116	2.28	12.37	CDKN1A	MMP2	FN1	GATA4	POU5F1	NPAS2	TAPBP	IL6	KLF5	CCND1	FASN	MYB	TNFSF10	RARB	TXNIP	PPARG	CRYAB	CLOCK
RARA human	10/26	0.004577118674977114	0.04294169520523983	3.32	17.88	RPTOR	ABCC3	CDKN1A	PLAU	SCD	CYP1A1	RARB	PRKCA	ETS1	ICAM1
FOSL2 human	7/15	0.004985998580745514	0.045942415494012234	4.64	24.62	FOSL1	TGFB1	MYB	PLAUR	MDM2	BRCA1	CLU
NR0B2 mouse	8/19	0.005812395835616702	0.04995973460831078	3.86	19.88	CDKN1A	NR5A2	MTF1	SERPINE1	SLC40A1	PPARG	PPARGC1A	NPAS2
PML human	8/19	0.005812395835616702	0.04995973460831078	3.86	19.88	CDKN1A	CCND1	CASP3	EAF2	TNFSF10	TNFAIP3	EGFR	PML
RUNX2 human	8/19	0.005812395835616702	0.04995973460831078	3.86	19.88	AR	LGALS3	PLAU	MMP2	LRP5	TWIST1	SNAI2	VEGFA
ATF4 human	12/35	0.005840667125502792	0.04995973460831078	2.77	14.25	IGFBP1	MAP1LC3B	IL6	PLAU	DDIT4	CCL2	TNFRSF10B	CHAC1	APOE	NUPR1	SIRT2	VEGFA
BRCA1 human	17/57	0.005906092657184027	0.04995973460831078	2.26	11.59	CDKN1A	FST	STAT2	CXCL1	AREG	EGFR	IGF1R	VEGFA	CCND1	MYC	CYP1A1	MDM2	CYP1B1	CTSD	TP63	IRF9	MAD2L1
[truncated: 75 more columns]
