# Supplementary material for: Circular RNA hsa_circ_0062682 Binds to YBX1 and Promotes Oncogenesis in Hepatocellular Carcinoma
Source: Cancers (Basel). 2022 Sep 19;14(18):4524. doi: 10.3390/cancers14184524 (PMC9497178; doi:10.3390/cancers14184524)
Supplement: Supplementary file 1 [file cancers-14-04524-s001.zip › Table S6.xlsx]

## Sheet: Upregulated
Enrichr analysis of enriched pathways (KEGG database) of differentially expressed upregulated genes in SNU-449 KD by adjusted p-value ≤ 0.05
Term	Overlap	P-value	Adjusted P-value	Old P-value	Old Adjusted P-value	Odds Ratio	Combined Score	Genes
Lysosome	32/128	1.30369e-08	3.91108e-06	0	0	3.70323	67.2339	SCARB2;CD63;ASAH1;IDUA;LITAF;AP3M2;CTSO;GNPTAB;LAMP1;CTSL;SMPD1;NEU1;ATP6V0A2;SLC17A5;CTSH;IDS;AP1S3;AGA;CTSD;CTSC;HGSNAT;MANBA;ENTPD4;SORT1;FUCA1;FUCA2;M6PR;AP3D1;IGF2R;NPC1;ATP6V0C;GLA
Steroid biosynthesis	11/20	1.12201e-07	1.68302e-05	0	0	13.4709	215.575	SQLE;EBP;NSDHL;SOAT1;CYP51A1;SC5D;DHCR24;MSMO1;DHCR7;HSD17B7;FDFT1
AGE-RAGE signaling pathway in diabetic complications	21/100	6.76252e-05	0.00540519	0	0	2.93628	28.1928	TGFB2;TGFB1;TGFB3;MMP2;SERPINE1;FN1;PIK3R2;F3;FOXO1;AGT;VEGFA;COL1A1;CDC42;MAPK10;COL3A1;PLCB4;COL4A2;COL4A1;COL4A6;COL4A5;CCL2
FoxO signaling pathway	25/131	7.70346e-05	0.00540519	0	0	2.60765	24.6977	PRKAA2;PRKAG1;IRS2;PIK3R2;FOXO1;GABARAP;IGF1R;IKBKB;STK11;TNFSF10;CREBBP;TGFB2;MAP2K2;TGFB1;HOMER1;TGFB3;FBXO32;SOD2;PRKAB1;MAPK10;G6PC3;CCNG2;MDM2;SGK3;IL7R
Proteoglycans in cancer	34/205	9.00866e-05	0.00540519	0	0	2.20254	20.5161	CD63;PXN;TWIST1;ITPR2;PIK3R2;THBS1;IGF1R;CDC42;PPP1CC;CTSL;ERBB4;FLNA;DROSHA;ITGAV;TGFB2;MAP2K2;TGFB1;FZD5;WNT5B;LUM;MMP2;FZD6;WNT5A;FN1;ANK2;FRS2;PTPN11;VEGFA;COL1A1;MRAS;MDM2;SDC1;CTNNB1;CD44
Starch and sucrose metabolism	11/36	0.000114351	0.00540964	0	0	4.84529	43.977	GPI;MGAM;G6PC3;GBE1;AGL;AMY1C;ENPP1;GBA3;GYG2;GYG1;PGM1
Herpes simplex virus 1 infection	66/498	0.000126225	0.00540964	0	0	1.70128	15.2732	ZNF132;ZNF571;IFIH1;IKBKB;PPP1CC;ZFP30;ZNF528;ZNF84;ZNF845;ZNF404;ZNF568;ZNF841;B2M;ZNF486;IFNAR2;IFNGR1;ZNF480;ZFP92;ZNF705A;IRAK4;TAPBP;ZNF91;OAS1;TRAF3;OAS2;ZNF836;TRAF5;ZNF713;ZNF780B;TLR3;SRSF9;ZNF154;ZNF350;PIK3R2;C3;ZFP57;IRAK1;ZNF548;CCL2;ZNF701;ZNF226;ZNF347;ZNF468;ZNF302;ZNF587;ZNF300;ZNF221;ZNF583;ZNF461;ZNF460;ZNF140;STAT2;ZNF181;EIF2AK3;PTPN11;PML;BST2;ZNF559-ZNF177;ZNF613;ZNF699;ZNF…
Autophagy	25/137	0.00016242	0.00609076	0	0	2.46714	21.5266	PRKAA2;IRS2;PIK3R2;ZFYVE1;GABARAP;IGF1R;STK11;DEPTOR;LAMP1;CTSL;MLST8;SUPT20H;CTSD;MAP2K2;DAPK1;ATG9A;EIF2AK3;MAPK10;MRAS;RRAGC;RRAGB;RRAGD;ULK2;RAB7B;ATG4D
mTOR signaling pathway	26/154	0.000435326	0.0145103	0	0	2.24449	17.371	PRKAA2;NPRL3;LRP5;PIK3R2;IGF1R;LRP6;IKBKB;STK11;DEPTOR;GRB10;MLST8;SLC38A9;FNIP1;FNIP2;MAP2K2;WNT5B;FZD5;WNT5A;FZD6;CLIP1;RRAGC;RRAGB;RRAGD;ULK2;LPIN1;LAMTOR3
Renal cell carcinoma	15/69	0.000483677	0.0145103	0	0	3.06142	23.3712	ARNT2;FH;CREBBP;EGLN3;TGFB2;MAP2K2;TGFB1;TGFB3;SLC2A1;PIK3R2;PTPN11;VEGFA;CDC42;RAP1A;PAK4
Insulin resistance	20/108	0.000579589	0.015807	0	0	2.5077	18.6904	PRKAA2;GFPT2;NR1H2;PRKAG1;SLC2A1;IRS2;PIK3R2;PTPN11;PRKAB1;FOXO1;AGT;IKBKB;MAPK10;PPP1CC;G6PC3;PPP1R3B;PPP1R3E;CREB3L2;CD36;PPARGC1A
Focal adhesion	31/201	0.000659065	0.0163825	0	0	2.01643	14.7697	PXN;RASGRF1;PDGFA;PIK3R2;THBS2;THBS1;IGF1R;CDC42;PPP1CC;RAP1A;PDGFC;FLNA;ITGAV;PIP5K1C;PAK4;FN1;VEGFA;COL1A1;MAPK10;COL4A2;COL4A1;ITGA10;COL6A2;COL6A1;ZYX;COL4A6;CTNNB1;COL4A5;COL6A3;MYL9;VCL
TGF-beta signaling pathway	18/94	0.000709908	0.0163825	0	0	2.61185	18.9369	SMAD1;CREBBP;TGFB2;BMPR2;TGIF2;TGFB1;TGFB3;FST;NOG;INHBA;SMAD6;LTBP1;THBS1;GREM1;TFDP1;BAMBI;SP1;FBN1
MAPK signaling pathway	41/294	0.000836071	0.0179158	0	0	1.79472	12.7188	PTPRR;CSF1;RASGRF1;PDGFA;CACNA1A;DUSP16;IGF1R;RASGRP3;IKBKB;CDC42;PPP3CA;RPS6KA5;RAP1A;DUSP10;IRAK1;ERBB4;PDGFC;GNA12;FLNA;CACNG4;MAP2K6;TGFB2;JUND;DUSP3;MAP2K2;TGFB1;IL1R1;BDNF;TGFB3;IRAK4;DUSP8;VEGFA;CDC25B;EFNA1;MAPK10;KITLG;MRAS;RASA1;MAPKAPK5;LAMTOR3;MAP3K12
Axon guidance	28/182	0.00121689	0.0243377	0	0	2.00862	13.4808	NRP1;ROBO3;BMPR2;SEMA3A;NTN4;PIK3R2;SEMA3E;ROBO1;CDC42;PPP3CA;ABLIM3;BOC;ABL1;PLXNA1;SLIT3;NCK1;PAK4;WNT5B;TRPC1;WNT5A;PTPN11;L1CAM;RHOD;EFNA1;ENAH;CDK5;RASA1;MYL9
TNF signaling pathway	19/112	0.00229836	0.0424057	0	0	2.25225	13.6837	CXCL6;CSF1;ATF6B;DAB2IP;TNFAIP3;PIK3R2;CXCL1;TRAF1;CXCL5;IKBKB;MAPK10;MMP14;RPS6KA5;TRAF3;CREB3L2;TRAF5;CCL2;JUNB;MAP2K6
ECM-receptor interaction	16/88	0.00240299	0.0424057	0	0	2.4482	14.7652	FN1;THBS2;THBS1;COL1A1;COL4A2;COL4A1;COL6A2;ITGA10;COL6A1;COL4A6;COL4A5;COL6A3;SDC1;ITGAV;CD36;CD44
Parathyroid hormone synthesis, secretion and action	18/106	0.00292343	0.0487238	0	0	2.2542	13.1533	SLC34A2;JUND;ATF6B;VDR;PDE4D;LRP5;ITPR2;RUNX2;LRP6;MMP14;MMP24;PLCB4;NACA;SP1;MMP15;CREB3L2;GNA12;PDE4B
Diabetic cardiomyopathy	29/203	0.00315161	0.0497622	0	0	1.84033	10.6	COX7B;NDUFA12;SLC2A1;PIK3R2;COX7C;COX5A;PPP1CC;PDK3;UQCRFS1;CD36;CTSD;NDUFV1;PDK2;NDUFA9;TGFB2;TGFB1;TGFB3;GFPT2;MMP2;SDHB;AGT;COL1A1;MAPK10;COL3A1;PLCB4;SP1;NDUFS4;UQCRC1;SLC25A4

## Sheet: Downregulated
Enrichr analysis of enriched pathways (KEGG database) of differentially expressed downregulated genes in SNU-449 KD by adjusted p-value ≤ 0.05
Term	Overlap	P-value	Adjusted P-value	Old P-value	Old Adjusted P-value	Odds Ratio	Combined Score	Genes
Cell cycle	25/124	4.52535e-06	0.00136665	0	0	3.15263	38.7956	ANAPC13;CDKN1A;PCNA;CDC14A;ORC4;ORC6;CDC45;CCND1;CHEK2;MYC;CDC27;ORC2;E2F4;BUB1;YWHAH;CDC6;CDC25A;RBX1;DBF4;RBL1;MCM3;MCM5;MCM6;ANAPC1;MAD2L1
TGF-beta signaling pathway	18/94	0.000188619	0.0284815	0	0	2.94653	25.2688	ACVR1;TGIF1;SMURF2;RGMB;ACVR2B;ACVR2A;BMP6;RBX1;TGFBR2;BMP5;BMP4;RBL1;PPP2R1B;RPS6KB1;MYC;ID2;ID1;E2F4
