# Supplementary material for: Circular RNA hsa_circ_0062682 Binds to YBX1 and Promotes Oncogenesis in Hepatocellular Carcinoma
Source: Cancers (Basel). 2022 Sep 19;14(18):4524. doi: 10.3390/cancers14184524 (PMC9497178; doi:10.3390/cancers14184524)
Supplement: Supplementary file 1 [file cancers-14-04524-s001.zip › Table S7.xlsx]

## Sheet: Upregulated
Enrichr analysis of enriched transcription factors (TRRUST database) of differentially expressed upregulated gene in SNU-449 KD by adjusted p-value ≤ 0.05
Term	Overlap	P-value	Adjusted P-value	Old P-value	Old Adjusted P-value	Odds Ratio	Combined Score	Genes
EZH2 human	13/40	1.31237e-05	0.00353919	0	0	5.3079	59.6666	VDR;MMP2;RPLP0;PEBP1;TWIST1;HOXB13;FBXO32;RUNX3;SFRP1;ADAMTS1;POLR3D;SNAI2;PIP5K1C
TWIST2 human	10/25	1.65383e-05	0.00353919	0	0	7.34095	80.8226	SRPX;RAP1A;CDH2;MMP2;MYB;F2R;FN1;DKK1;RUNX2;CD44
NFKB1 human	47/303	2.73684e-05	0.00390456	0	0	2.04042	21.4369	PTGFR;SERPINA3;CSF1;SERPINE1;CFI;TNFAIP3;CRMP1;CXCL1;CXCL5;SLC25A27;TNFSF10;ADORA1;REPS2;OLR1;CCL2;HES1;NCAM1;CD58;B2M;JUNB;TGFB1;TSLP;ERAP2;TNFRSF9;MMP2;TRPC1;FN1;PROX1;TRAF1;PTPN13;SOD2;F3;AGT;VEGFA;TAPBP;COL1A1;BACE1;NCOR2;CEACAM1;MMP14;SNAI1;SDC1;CYP2E1;PDE7A;OPTN;TLR3;ABCG2
HOXB7 human	6/10	5.30801e-05	0.00454366	0	0	16.4874	162.297	DAPK1;MMP2;WNT5A;PDGFA;THBS2;VEGFA
SNAI1 human	6/10	5.30801e-05	0.00454366	0	0	16.4874	162.297	CDH2;VDR;FN1;SNAI1;PEBP1;THBS1
KLF8 human	5/8	0.000183844	0.0119812	0	0	18.3094	157.486	SLC22A3;MMP14;CDH2;FN1;EPSTI1
RELA human	44/301	0.000195953	0.0119812	0	0	1.89914	16.2141	PTGFR;SERPINA3;CSF1;SERPINE1;CFI;TWIST1;TNFAIP3;CXCL1;CXCL5;SLC25A27;TNFSF10;ADORA1;REPS2;OLR1;CCL2;HES1;NCAM1;CD58;JUNB;TSLP;ERAP2;TNFRSF9;MMP2;TRPC1;FN1;PROX1;TRAF1;PTPN13;SOD2;F3;AGT;VEGFA;TAPBP;COL1A1;BACE1;NCOR2;CEACAM1;MMP14;SNAI1;SDC1;CYP2E1;OPTN;TLR3;ABCG2
TWIST1 human	10/35	0.000427929	0.0228942	0	0	4.40216	34.1456	SRPX;RAP1A;CDH2;MMP2;MYB;F2R;FN1;DKK1;RUNX2;CD44
SMAD3 mouse	12/49	0.000560779	0.0249048	0	0	3.57128	26.7352	TAGLN;DAPK1;SERPINE1;FN1;SNAI1;ENPP1;CCL2;PPARG;PPARGC1A;RUNX2;TPT1;VEGFA
TFAP2A human	15/71	0.000666127	0.0249048	0	0	2.95176	21.5893	KLF12;CD82;IGFBP5;GALNT3;MMP2;F2R;LNPEP;L1CAM;SOD2;SNAP91;VEGFA;BACE1;COL1A1;SPRY2;CRYAB
TRP53 mouse	27/167	0.000685887	0.0249048	0	0	2.13092	15.5233	EI24;SERPINE1;FPR1;FOXM1;THBS1;IGF1R;GLIPR1;CASP6;PCBP2;PMAIP1;POLK;GABRE;EDIL3;ABCC1;CDKN2C;MMP2;PROX1;SOD2;AGT;PML;KRT19;CDK5;PAPPA;MDM2;TCF4;NUPR1;TPT1
STAT3 human	24/142	0.000698266	0.0249048	0	0	2.24592	16.3209	LGALS3BP;TGFB1;MMP7;VDR;MMP2;FGL1;F2R;TWIST1;PRDM1;PTPN13;LTBP1;ETV6;VEGFA;STK11;MMP14;MUC1;CSRP1;OAS1;CHI3L1;CCL2;ROR1;JUNB;TP63;CFB
SP1 human	59/472	0.0012234	0.040278	0	0	1.58559	10.6332	SERPINE1;IRS2;CXCL1;FOXM1;CXCL5;IGF1R;STK11;CDH2;CTSL;SMPD1;TNFSF10;CYP1B1;SLC39A8;ITGAV;MYBL2;MYBL1;ABCC1;MME;IFNGR1;LMO4;IGFBP3;MMP2;F2R;DNMT3A;CYP7B1;F3;BACE1;MMP14;POR;KCNQ3;CHI3L1;EAPP;HOXB7;CD44;ABCG2;CREM;LRP5;CRMP1;ATP2C1;PDGFC;HAS2;CCL2;NDUFV1;CD99;CENPW;TGFB1;VDR;SCTR;DHCR24;SOD2;AGT;VEGFA;COL1A1;KRT19;P2RX4;TCN2;MDM2;SPRY2;FBN1
FOSL1 mouse	4/7	0.00138909	0.0424665	0	0	14.6387	96.3096	MMP2;PRDM1;THBS2;THBS1
ATM human	7/22	0.0015685	0.0447544	0	0	5.12941	33.1239	SP1;APLF;SLC2A1;PMAIP1;FOXM1;IGF1R;VEGFA

## Sheet: Downregulated
Enrichr analysis of enriched transcription factors (TRRUST database) of differentially expressed downregulated gene in SNU-449 KD by adjusted p-value ≤ 0.05
Term	Overlap	P-value	Adjusted P-value	Old P-value	Old Adjusted P-value	Odds Ratio	Combined Score	Genes
E2F1 human	31/134	1.21127e-08	5.43862e-06	0	0	3.77198	68.7594	TOP2A;CDKN1A;ABCB1;PCNA;MCM8;CDCA7;BRCA1;TYMS;RNF2;AURKB;NPAT;MAPK8;CCND1;CHEK2;MYC;NRIP1;TP53BP2;ECT2;MAP3K5;FZD1;APAF1;DUSP1;FANCA;HMGA1;CDC6;CD2AP;PNRC2;AR;DBF4;MT1G;MCM5
SP1 human	60/472	3.94924e-05	0.00835879	0	0	1.83066	18.5618	CDKN1A;OXTR;BRCA1;AREG;CTGF;ICAM1;CCND1;ADGRE5;SNAPC1;PLAU;MYC;CASP3;PHGDH;TK1;IGFBP1;ABCC3;CXADR;APAF1;IGFBP4;PRKCE;PLAUR;ADAM10;PAX6;TERF2;CD2AP;TGFBR2;CYP27A1;AR;DBF4;PADI3;MET;VAMP2;CERS2;B4GALT5;ABCB1;CBFB;ODC1;PON1;TYMS;CYP3A5;EGFR;HIST2H4A;NT5E;FXR2;CBS;SLC19A3;SRY;APOE;BRD7;MICB;TFPI2;HMGA1;TNFRSF10B;SMARCA1;KLF8;IL6;POLE2;ACO1;BLMH;ADA
CREB1 mouse	10/31	5.58494e-05	0.00835879	0	0	5.91001	57.8758	SLC20A1;NOCT;PRKCE;PDE3B;NFKBIZ;MITF;ACSL4;NMNAT2;PPM1D;ETV3
HIF1A human	17/83	0.000119745	0.0116986	0	0	3.20405	28.9331	ABCB1;PFKFB3;TFRC;BNIP3;CXCR4;CTGF;AR;ACE2;NT5E;CCND1;LOX;TUBB3;PLAU;ZNF217;CCR7;BID;MET
FOXM1 human	7/17	0.000130274	0.0116986	0	0	8.6754	77.609	FGB;AR;KRT15;MYC;CDC6;APOE;CDC25A
HDAC1 human	15/71	0.000206298	0.0140696	0	0	3.32926	28.2528	CDKN1A;PCNA;ABCB1;TNFRSF10A;KLF4;POU5F1;EGFR;ICAM1;TJP1;AR;CCND1;EPCAM;TXNIP;BIRC3;MICB
TP53 human	26/164	0.000219348	0.0140696	0	0	2.34874	19.7878	BTG3;CDKN1A;ABCB1;BRCA1;TYMS;EGFR;GLI2;CCND1;CHEK2;MYC;CASP3;IER3;APAF1;CHUK;DUSP1;MMP1;TNFRSF10B;TNFRSF10A;RAD51B;ID2;TBXAS1;ID1;MDM4;MET;EPHA2;BCL2L1
PAX3 human	4/6	0.000416924	0.0224096	0	0	24.7478	192.603	CXCR4;MITF;MET;BCL2L1
RARA human	8/26	0.00044919	0.0224096	0	0	5.5095	42.4676	RPTOR;ABCC3;CDKN1A;PLAU;CYP1A1;PRKCA;ETS1;ICAM1
AHR human	7/22	0.000818974	0.0290885	0	0	5.78204	41.0956	MT2A;IL6;PCNA;CCND1;MYC;CYP1A1;BRCA1
SOX2 human	7/22	0.000818974	0.0290885	0	0	5.78204	41.0956	ABCC3;ASXL1;BMP4;CCND1;TUBB3;PAX6;ITGA6
E2F1 mouse	11/49	0.000827224	0.0290885	0	0	3.59177	25.4923	NPAT;CDKN1A;PCNA;CCND1;APAF1;MCM8;BIN1;HMGA1;TK1;BID;MERTK
WT1 human	12/57	0.000897933	0.0290885	0	0	3.30975	23.2193	AR;CDKN1A;ABCB1;ADGRE5;MYC;ODC1;SRY;ETS1;CDC73;EGFR;CTGF;EREG
HOXA1 human	4/7	0.000914947	0.0290885	0	0	16.4977	115.428	PCNA;CCND1;MYC;IER3
LEF1 human	8/29	0.0010084	0.0290885	0	0	4.72166	32.5766	AR;CYLD;NT5E;MYCBP;CCND1;MYC;MITF;CLDN2
PPARG human	13/66	0.00107852	0.0290885	0	0	3.04507	20.8045	CDKN1A;POU2F1;MMP1;VLDLR;CLDN2;FGF1;KLF4;EGFR;ICAM1;CCND1;MYC;TXNIP;BCL2L1
E2F4 human	7/23	0.00110175	0.0290885	0	0	5.42037	36.9174	AR;CCND1;MYC;MCM10;BRCA1;AURKB;MAP3K5
MYC human	17/100	0.00116613	0.0290885	0	0	2.54545	17.1922	DDX18;CDKN1A;PCNA;TFRC;CBFB;UBE2C;ODC1;CDCA7;TNFRSF10B;CXCR4;IL6;CCND1;CHEK2;ID2;IGF2BP1;BRD7;IER3
YBX1 human	8/30	0.00128576	0.0303846	0	0	4.5068	29.9991	TOP2A;AR;ABCB1;CXCR4;TYMS;MET;EGFR;RAD9A
FOXO1 human	7/24	0.00145575	0.0326815	0	0	5.10125	33.3225	IGFBP1;AR;IL6;CXCR4;TXNIP;ADIPOR1;NLK
MYCN human	10/45	0.00153298	0.0327766	0	0	3.54332	22.9626	CDKN1A;ABCB1;MCM8;ID2;HMGA1;MCM3;MCM10;MCM5;MCM6;CLU
POU2F1 human	9/38	0.00162395	0.0329086	0	0	3.84744	24.7117	RPTOR;AR;SDC4;CCND1;SNAPC1;PLAU;ID1;TK1;MAD2L1
JUN human	22/149	0.00168574	0.0329086	0	0	2.15497	13.7607	BECN1;NQO1;OXTR;CDKN1A;BATF3;ABCB1;MAP3K1;MMP1;PLAUR;TNFRSF10A;BRCA1;ETS1;EGFR;CTGF;FOSL1;AR;IL6;MAPK8;CCND1;PLAU;MYC;BCL2L1
ZEB1 human	5/13	0.00181519	0.0339591	0	0	7.73636	48.8286	AR;CXADR;EPCAM;LAMC2;POU5F1
CREB1 human	15/90	0.002706	0.0484075	0	0	2.48329	14.6819	SLC20A1;ODC1;NOLC1;CXCR4;MITF;TRH;NMNAT2;ETV3;PPM1D;AR;RP1;IL6;CASP8;NR5A2;PLAU
HIC1 human	4/9	0.00291504	0.0484075	0	0	9.89753	57.7805	MYC;VLDLR;LRP8;EPHA2
TFCP2 human	4/9	0.00291504	0.0484075	0	0	9.89753	57.7805	FGA;PAX6;SRY;TYMS
FOS human	11/57	0.00301873	0.0484075	0	0	2.96583	17.2105	NQO1;OXTR;BATF3;SRR;CCND1;PLAU;MMP1;MYC;PLAUR;CLU;BCL2L1
