# Supplementary material for: Circular RNA hsa_circ_0062682 Binds to YBX1 and Promotes Oncogenesis in Hepatocellular Carcinoma
Source: Cancers (Basel). 2022 Sep 19;14(18):4524. doi: 10.3390/cancers14184524 (PMC9497178; doi:10.3390/cancers14184524)
Supplement: Supplementary file 1 [file cancers-14-04524-s001.zip › Table S8.xlsx]

## Sheet: Sheet1
Potential binding sites of RNA binding proteins (RBPs) in hsa_circ_0062682 identified in silico by at least 2 algorithms
	RBP binding prediction algortihm
RNA-binding protein (RBP)	RBPDB	CIS-BP	RBP-MAP
MBNL1	19	9	74
RBM4	7	10	12
SRSF1	15	33	45
SRSF9	6	25	5
FUS	17	13	11
RBFOX1 (A2BP1)	1	3	0
EIF4B	11	23	0
ACO1	1	7	0
YBX1 (YB-1)	4	4	0
YTHDC1	8	12	0
RBMX	26	31	0
RBMY1A1	4	29	0
LIN28A	0	7	2
PCBP1	0	2	2
PCBP2	0	3	2
YBX2	0	3	2
BRUNOL6	0	1	1
ESRP2	0	1	1
FXR1	0	8	2
FXR2	0	8	2
G3BP1	0	1	2
HNRNPF	0	3	12
HNRNPH1	0	3	4
HNRNPH2	0	3	4
HNRNPK	0	4	5
PPRC1	0	7	9
RBM42	0	2	1
RBM5	0	3	4
RBM8A	0	4	17
SAMD4A	0	7	18
ZC3H10	0	6	5
SRSF2	0	3	68
SRSF3	0	4	67
SRSF5	0	10	12
SRSF7	0	1	6
