# Supplementary material for: Circular RNA hsa_circ_0062682 Binds to YBX1 and Promotes Oncogenesis in Hepatocellular Carcinoma
Source: Cancers (Basel). 2022 Sep 19;14(18):4524. doi: 10.3390/cancers14184524 (PMC9497178; doi:10.3390/cancers14184524)
Supplement: Supplementary file 1 [file cancers-14-04524-s001.zip › Table S9.xlsx]

## Sheet: Huh-7 cell line pulldown
Biological sample name	MS/MS sample name	Cluster	Protein name	Protein accession numbers	Alternate IDs	Protein molecular weight (Da)	Protein identification probability	Exclusive unique peptide count	Exclusive unique spectrum count	Total spectrum count	Percentage of total spectra	Percentage sequence coverage
A1	HUH_A1	Cluster of cytokeratin 8 [Homo sapiens] (AAA35763.1)	Keratin 5 [Homo sapiens]	AAH24292.1,EAW96635.1,NP_000415.2		62,379.6	48.7%	0	0	6	0.0678%	4.41%
A1	HUH_A1	Cluster of Single-stranded DNA binding protein 1 [Homo sapiens] (AAH93054.1)	Single-stranded DNA binding protein 1 [Homo sapiens]	AAH93054.1,NP_003134.1,XP_005250105.1		18,558.5	100.0%	2	2	2	0.0226%	15.5%
A1	HUH_A1	Cluster of pyruvate carboxylase precursor [Homo sapiens] (AAA82937.1)	pyruvate carboxylase precursor [Homo sapiens]	AAA82937.1,NP_071504.2		129,634.7	100.0%	30	33	65	0.734%	30.8%
A1	HUH_A1	Cluster of heat shock protein HSP 90-beta isoform c [Homo sapiens] (NP_001258901.1)	heat shock 90kDa protein 1, alpha [Homo sapiens]	ABC40730.1,NP_001017963.2,NP_005339.3,XP_011535020.1		98,078.0	100.0%	8	12	161	1.82%	43.0%
A1	HUH_A1	Cluster of cytokeratin 8 [Homo sapiens] (AAA35763.1)	keratin 1 [Homo sapiens]	AFA52003.1		66,070.3	100.0%	2	2	30	0.339%	21.1%
A1	HUH_A1	Cluster of 40-kDa keratin protein, partial [Homo sapiens] (AAA36044.1)	keratin 18 variant, partial [Homo sapiens]	BAD96813.1,BAG36700.1,CAA31377.1,NP_000215.1		47,335.1	100.0%	11	11	29	0.328%	31.6%
A1	HUH_A1	Cluster of lysyl hydroxylase isoform 2 [Homo sapiens] (AAB58363.1)	lysyl hydroxylase isoform 2 [Homo sapiens]	AAB58363.1,BAD93116.1,BAG58125.1,EAW78940.1,NP_000926.2,NP_891988.1,XP_005247592.1,XP_024309367.1		84,687.4	100.0%	2	2	3	0.0339%	2.99%
A1	HUH_A1	Cluster of glutaminyl-tRNA synthetase variant, partial [Homo sapiens] (BAD96230.1)	glutaminyl-tRNA synthetase variant, partial [Homo sapiens]	BAD96230.1,BAG60295.1,EAW64954.1,NP_001259002.1,NP_005042.1,XP_016862454.2		87,799.9	100.0%	3	3	15	0.169%	16.3%
A1	HUH_A1	Cluster of cytokeratin 8 [Homo sapiens] (AAA35763.1)	Keratin 6A [Homo sapiens]	AAH69269.1,BAF82934.1,BAG61372.1,EAW96630.1,NP_005545.1		59,917.3	51.3%	0	0	10	0.113%	7.80%
A1	HUH_A1	Cluster of unnamed protein product [Homo sapiens] (BAF83825.1)	unnamed protein product [Homo sapiens]	BAF83825.1		82,272.3	100.0%	14	14	21	0.237%	20.8%
A1	HUH_A1	Cluster of DEAD box polypeptide 17 isoform p82 variant, partial [Homo sapiens] (BAD92832.1)	DEAD box polypeptide 17 isoform p82 variant, partial [Homo sapiens]	BAD92832.1,BAG64169.1,CAH10627.2,EAW60242.1,EAW60248.1,NP_001091974.1,NP_006377.2,XP_001092491.2,XP_003821639.1		80,274.0	100.0%	2	2	3	0.0339%	3.66%
A1	HUH_A1	Cluster of unnamed protein product [Homo sapiens] (BAC86498.1)	unnamed protein product [Homo sapiens]	BAC86498.1,NP_000280.1,NP_001160158.1,NP_001341664.1,NP_001341669.1,NP_001341670.1,NP_001341674.1,NP_001341675.1,NP_001341676.1		85,183.5	100.0%	5	5	6	0.0678%	6.46%
A1	HUH_A1	Cluster of mRNA-binding protein CRDBP [Homo sapiens] (AAF37203.1)	mRNA-binding protein CRDBP [Homo sapiens]	AAF37203.1,NP_006537.3,XP_005350688.1,XP_016879511.1		63,480.5	100.0%	5	5	7	0.0791%	10.9%
A1	HUH_A1	Cluster of GANAB protein [Homo sapiens] (AAH65266.1)	GANAB protein [Homo sapiens]	AAH65266.1,BAA07642.1,BAG58692.1,BAG61688.1,CAA04006.1,EAW74046.1,EAW74047.1,EAW74050.1,NP_001265123.1,NP_938148.1,NP_938149.2		106,770.8	100.0%	7	7	8	0.0904%	9.45%
A1	HUH_A1	Cluster of plakophilin 3 variant, partial [Homo sapiens] (BAD97231.1)	plakophilin 3 variant, partial [Homo sapiens]	BAD97231.1,EAX02323.1,NP_001289958.1,NP_009114.1		87,084.7	100.0%	5	5	6	0.0678%	6.27%
A1	HUH_A1	Cluster of heterogeneous nuclear ribonucleoprotein K transcript variant [Homo sapiens] (AAW84289.1)	heterogeneous nuclear ribonucleoprotein K transcript variant [Homo sapiens]	AAW84289.1,BAD92799.1,EAW62679.1,EAW62680.1,NP_112553.1		51,030.4	99.8%	1	1	1	0.0113%	2.37%
A1	HUH_A1	Cluster of 40-kDa keratin protein, partial [Homo sapiens] (AAA36044.1)	40-kDa keratin protein, partial [Homo sapiens]	AAA36044.1,NP_002267.2		44,107.1	100.0%	5	5	14	0.158%	23.0%
A1	HUH_A1	Cluster of unnamed protein product [Homo sapiens] (BAG59860.1)	unnamed protein product [Homo sapiens]	BAG59860.1,BAJ83987.1,EAX00895.1,NP_004930.1		82,433.2	100.0%	4	4	6	0.0678%	7.52%
A1	HUH_A1	Cluster of 40-kDa keratin protein, partial [Homo sapiens] (AAA36044.1)	Keratin 10 [Homo sapiens]	AAH34697.1,CAA32649.1,EAW60681.1,NP_000412.3,P13645.6,XP_005257400.1		58,828.8	100.0%	8	8	16	0.181%	20.5%
A1	HUH_A1	Cluster of Ezrin [Homo sapiens] (AAH68458.1)	Radixin [Homo sapiens]	AAH47109.1,EAW67131.1,NP_001247421.1,NP_002897.1		67,328.0	100.0%	3	3	12	0.136%	11.1%
A1	HUH_A1	Cluster of E3 ubiquitin-protein ligase TRIM71 [Homo sapiens] (NP_001034200.1)	E3 ubiquitin-protein ligase TRIM71 [Homo sapiens]	NP_001034200.1		93,384.4	100.0%	9	9	16	0.181%	13.2%
A1	HUH_A1	Cluster of 40-kDa keratin protein, partial [Homo sapiens] (AAA36044.1)	type I keratin 16 [Homo sapiens]	AAB35421.1,NP_005548.2		51,239.0	37.3%	0	0	10	0.113%	6.77%
A1	HUH_A1	Cluster of unnamed protein product [Homo sapiens] (BAG57047.1)	unnamed protein product [Homo sapiens]	BAG57047.1,BAG62959.1,BAM48570.1,NP_076950.1,XP_005270205.1		82,566.7	100.0%	2	2	2	0.0226%	3.27%
A1	HUH_A1	Cluster of poly(ADP-ribose) polymerase [Homo sapiens] (AAA60137.1)	poly(ADP-ribose) polymerase [Homo sapiens]	AAA60137.1,AAA60155.1,AAB59447.1,AAH37545.1,BAG35260.1,BAG64403.1,EAW69785.1,NP_001609.2		113,087.8	100.0%	4	4	6	0.0678%	4.64%
A1	HUH_A1	Cluster of Ribosomal protein S6 kinase, 90kDa, polypeptide 3 [Homo sapiens] (AAH96303.1)	Ribosomal protein S6 kinase, 90kDa, polypeptide 3 [Homo sapiens]	AAH96303.1,BAC81131.1,BAD92170.1,BAG59354.1,NP_004577.1,XP_002762755.1,XP_005274630.1,XP_006724570.1,XP_007989450.1,XP_007989452.1		83,738.5	100.0%	12	15	33	0.373%	26.2%
A1	HUH_A1	Cluster of DEAH (Asp-Glu-Ala-His) box polypeptide 15, isoform CRA_g [Homo sapiens] (EAW92820.1)	DEAH (Asp-Glu-Ala-His) box polypeptide 15, isoform CRA_g [Homo sapiens]	EAW92820.1		80,539.1	100.0%	10	10	14	0.158%	14.4%
A1	HUH_A1	Cluster of heat shock protein gp96 precursor, partial [Homo sapiens] (AAK74072.1)	heat shock protein gp96 precursor, partial [Homo sapiens]	AAK74072.1,CAI64497.1,NP_003290.1		92,342.6	100.0%	13	13	34	0.384%	18.5%
A1	HUH_A1	Cluster of unnamed protein product [Homo sapiens] (BAG52115.1)	unnamed protein product [Homo sapiens]	BAG52115.1,NP_001075.1		84,786.8	100.0%	2	2	3	0.0339%	3.25%
A1	HUH_A1	Cluster of Glucosidase I [Homo sapiens] (AAH28337.1)	Glucosidase I [Homo sapiens]	AAH28337.1		91,908.0	100.0%	5	5	8	0.0904%	6.45%
A1	HUH_A1	Cluster of leucine zipper-EF-hand containing transmembrane protein 1, isoform CRA_a [Homo sapiens] (EAW82560.1)	leucine zipper-EF-hand containing transmembrane protein 1, isoform CRA_a [Homo sapiens]	EAW82560.1,NP_036450.1,XP_006713947.1		83,355.9	100.0%	3	3	3	0.0339%	5.37%
A1	HUH_A1	Cluster of alloalbumin Venezia [Homo sapiens] (AAA98798.1)	alloalbumin Venezia [Homo sapiens]	AAA98798.1,AAF01333.1,AAN17825.1,AEE60908.1,BAF85444.1,BAG37325.1,BAG60658.1,CAA23754.1,CAH18185.1,EAX05666.1,NP_000468.1		68,613.1	100.0%	5	5	6	0.0678%	6.29%
A1	HUH_A1	Cluster of hypothetical protein [Homo sapiens] (CAD97651.1)	hypothetical protein [Homo sapiens]	CAD97651.1,NP_003583.2		89,681.4	100.0%	2	2	3	0.0339%	2.32%
A1	HUH_A1	Cluster of replication protein A 70 kDa DNA-binding subunit isoform 1 [Homo sapiens] (NP_002936.1)	replication protein A 70 kDa DNA-binding subunit isoform 1 [Homo sapiens]	NP_002936.1		68,139.0	100.0%	7	7	12	0.136%	13.3%
A1	HUH_A1	Cluster of SSRP1 protein, partial [Homo sapiens] (AAH91486.1)	SSRP1 protein, partial [Homo sapiens]	AAH91486.1,NP_003137.1,XP_008950096.1,XP_016873669.1,XP_024304432.1,XP_024304435.1		81,077.6	100.0%	2	2	2	0.0226%	3.48%
A1	HUH_A1	Cluster of villin 1 variant, partial [Homo sapiens] (BAD97118.1)	villin 1 variant, partial [Homo sapiens]	BAD97118.1,BAG36454.1,CAA31386.1,NP_009058.2		92,695.2	100.0%	11	11	15	0.169%	16.3%
A1	HUH_A1	Cluster of glutamate dehydrogenase (NAD(P)+) [Homo sapiens] (CAA46995.1)	glutamate dehydrogenase (NAD(P)+) [Homo sapiens]	CAA46995.1,NP_036216.2		61,434.7	99.9%	1	1	2	0.0226%	3.94%
A1	HUH_A1	Cluster of X-ray repair complementing defective repair in Chinese hamster cells 5 (double-strand-break rejoining; Ku autoantigen, 80kDa), isoform CRA_b [Homo sapiens] (EAW70563.1)	X-ray repair complementing defective repair in Chinese hamster cells 5 (double-strand-break rejoining; Ku autoantigen, 80kDa), isoform CRA_b [Homo sapiens]	EAW70563.1		93,526.9	100.0%	14	15	29	0.328%	18.1%
A1	HUH_A1	Cluster of cellular apoptosis susceptibility protein [Homo sapiens] (AAC35008.1)	cellular apoptosis susceptibility protein [Homo sapiens]	AAC35008.1,AAC50367.1,BAG59743.1,NP_001243064.1,NP_001307.2,NP_001349691.1,XP_017396871.1		110,421.9	100.0%	2	2	2	0.0226%	1.65%
A1	HUH_A1	Cluster of KIAA0776 protein, partial [Homo sapiens] (AAH15377.1)	KIAA0776 protein, partial [Homo sapiens]	AAH15377.1,AAH28608.1,EAW48506.1,NP_056138.1		89,598.0	100.0%	4	4	4	0.0452%	8.85%
A1	HUH_A1	Cluster of P1cdc47 [Homo sapiens] (BAA09534.1)	P1cdc47 [Homo sapiens]	BAA09534.1,BAG37153.1,BAH84845.1,NP_005907.3		81,309.0	100.0%	13	13	20	0.226%	22.3%
A1	HUH_A1	Cluster of elongation factor 2 [Homo sapiens] (NP_001952.1)	elongation factor 2 [Homo sapiens]	NP_001952.1		95,340.1	100.0%	16	17	26	0.294%	18.1%
A1	HUH_A1	Cluster of Sec23 homolog A (S. cerevisiae) [Homo sapiens] (AAH36649.1)	Sec23 homolog A (S. cerevisiae) [Homo sapiens]	AAH36649.1,BAG61717.1		86,166.5	100.0%	8	8	11	0.124%	11.9%
A1	HUH_A1	Cluster of MSTP086 [Homo sapiens] (AAQ13609.1)	MSTP086 [Homo sapiens]	AAQ13609.1,ALQ34249.1,BAC11519.1,NP_110416.1,NP_848695.1,NP_848696.1		41,490.9	100.0%	2	2	2	0.0226%	3.43%
A1	HUH_A1	Cluster of thymopoietin alpha [Homo sapiens] (AAB60433.1)	thymopoietin alpha [Homo sapiens]	AAB60433.1,NP_003267.1		75,493.8	100.0%	7	7	9	0.102%	12.1%
A1	HUH_A1	Cluster of nucleolin [Homo sapiens] (AAA59954.1)	nucleolin [Homo sapiens]	AAA59954.1,BAC03738.1,NP_005372.2		74,326.1	100.0%	18	19	41	0.463%	22.5%
A1	HUH_A1	Cluster of GRP78 precursor, partial [Homo sapiens] (AAA52614.1)	GRP78 precursor, partial [Homo sapiens]	AAA52614.1,AAF13605.1,NP_005338.1,NP_071705.3		0.0	100.0%	4	4	7	0.0791%	11.5%
A1	HUH_A1	Cluster of coactivator activator [Homo sapiens] (AAK77961.1)	coactivator activator [Homo sapiens]	AAK77961.1,NP_006319.1		69,492.3	100.0%	16	17	35	0.395%	26.2%
A1	HUH_A1	Cluster of GSPT1 protein [Homo sapiens] (AAH09503.2)	GSPT1 protein [Homo sapiens]	AAH09503.2,AAP35368.1,BAF83071.1,EAW85130.1,NP_001123479.1,NP_002085.3		68,700.1	100.0%	3	3	3	0.0339%	4.58%
A1	HUH_A1	Cluster of Ezrin [Homo sapiens] (AAH68458.1)	Ezrin [Homo sapiens]	AAH68458.1,BAG35489.1,NP_003370.2,pir||T47177		69,402.6	100.0%	5	5	17	0.192%	13.3%
A1	HUH_A1	Cluster of cytokeratin 9 [Homo sapiens] (CAA82315.1)	cytokeratin 9 [Homo sapiens]	CAA82315.1		62,131.0	100.0%	5	5	9	0.102%	11.2%
A1	HUH_A1	Cluster of tumor necrosis factor type 1 receptor associated protein [Homo sapiens] (AAA87705.1)	tumor necrosis factor type 1 receptor associated protein [Homo sapiens]	AAA87705.1,AAH07897.1,BAA11226.1,BAD93080.1,BAG63219.1,CAB82366.2,EAW78270.1,NP_001265637.1,NP_002799.3,XP_011837239.1,pir||S66264		70,191.3	100.0%	2	2	2	0.0226%	3.40%
A1	HUH_A1	Cluster of chromosome X open reading frame 23, isoform CRA_a [Homo sapiens] (EAW98968.1)	chromosome X open reading frame 23, isoform CRA_a [Homo sapiens]	EAW98968.1,EAW98969.1,NP_001354703.1,NP_938020.2,XP_005274531.1,XP_005274532.1,XP_011543780.1,XP_011543781.1,XP_011543784.1,XP_016884879.1,XP_016884880.1		83,873.3	100.0%	2	2	2	0.0226%	3.20%
A1	HUH_A1	Cluster of Aldehyde dehydrogenase 18 family, member A1 [Homo sapiens] (AAI06055.1)	Aldehyde dehydrogenase 18 family, member A1 [Homo sapiens]	AAI06055.1,AAI43931.1,BAG35201.1,CAA64224.1,NP_001017423.1,NP_002851.2,XP_024303862.1,XP_024303864.1		87,302.9	100.0%	9	10	12	0.136%	11.9%
A1	HUH_A1	Cluster of bromodomain adjacent to zinc finger domain 1A [Homo sapiens] (BAA89209.1)	bromodomain adjacent to zinc finger domain 1A [Homo sapiens]	BAA89209.1		190,850.9	92.2%	1	1	1	0.0113%	0.478%
A1	HUH_A1	Cluster of alanyl-tRNA synthetase [Homo sapiens] (BAA06808.1)	alanyl-tRNA synthetase [Homo sapiens]	BAA06808.1,BAD96544.1,NP_001596.2		106,813.2	100.0%	6	6	8	0.0904%	7.02%
A1	HUH_A1	Cluster of FBXO18 protein, partial [Homo sapiens] (AAH32674.2)	FBXO18 protein, partial [Homo sapiens]	AAH32674.2,AAH80629.1,AAI13376.1,AAP97700.1,AAP97705.1,BAB55154.1,BAC04535.1,NP_001245381.1,NP_001245382.1,NP_116196.3,NP_835363.1,XP_016872331.1,XP_016872333.1,XP_016872334.1,XP_016872335.1		117,615.7	100.0%	2	2	5	0.0565%	5.29%
A1	HUH_A1	Cluster of Similar to AFG3 ATPase family gene 3-like 2 (yeast), partial [Homo sapiens] (AAH24282.1)	Similar to AFG3 ATPase family gene 3-like 2 (yeast), partial [Homo sapiens]	AAH24282.1,EAX01551.1,NP_006787.2		88,586.8	100.0%	3	3	4	0.0452%	4.68%
A1	HUH_A1	Cluster of KSRP [Homo sapiens] (AAB53222.1)	KSRP [Homo sapiens]	AAB53222.1,AAC50892.1,AAH85004.1,NP_001353228.1,NP_001353229.1,NP_003676.2		72,897.4	100.0%	16	16	27	0.305%	25.3%
A1	HUH_A1	Cluster of unnamed protein product [Homo sapiens] (BAG65416.1)	beta-actin-like protein 2 [Homo sapiens]	NP_001017992.1		42,004.2	97.9%	1	1	2	0.0226%	6.65%
A1	HUH_A1	Cluster of Aconitase 2, mitochondrial [Homo sapiens] (AAH26196.1)	Aconitase 2, mitochondrial [Homo sapiens]	AAH26196.1,BAG37362.1,BAG63920.1,CAG38805.1,NP_001089.1,XP_016884301.1		85,428.0	100.0%	7	7	8	0.0904%	11.2%
A1	HUH_A1	Cluster of unnamed protein product [Homo sapiens] (BAG37316.1)	unnamed protein product [Homo sapiens]	1QGK_A,BAG37316.1,EAW94809.1,NP_002256.2		93,843.3	100.0%	11	12	16	0.181%	14.8%
A1	HUH_A1	Cluster of EEF1A1 protein [Homo sapiens] (AAH71619.1)	elongation factor 1 alpha, partial [Homo sapiens]	AAA52344.1		24,195.9	7.2%	0	0	1	0.0113%	4.85%
A1	HUH_A1	Cluster of calnexin isoform b [Homo sapiens] (NP_001350923.1)	calnexin isoform b [Homo sapiens]	NP_001350923.1		71,504.8	100.0%	14	14	26	0.294%	22.3%
A1	HUH_A1	Cluster of B-CAM [Homo sapiens] (CAA56327.1)	B-CAM [Homo sapiens]	CAA56327.1,CAA58449.1,CCC42285.1,CCI71887.1,CDR98196.1,CEJ95652.1,EAW57294.1,EAW57295.1,NP_001013275.1,NP_005572.2,SBU87551.1		67,403.9	100.0%	5	5	5	0.0565%	10.4%
A1	HUH_A1	Cluster of scaffold attachment factor A [Homo sapiens] (AAC19382.1)	scaffold attachment factor A [Homo sapiens]	AAC19382.1,AAH15782.1,BAG54384.1,BAG59625.1,CAA46472.1,NP_004492.2,NP_114032.2		79,716.0	100.0%	11	12	23	0.260%	13.5%
A1	HUH_A1	Cluster of 80K-H protein [Homo sapiens] (AAA52493.1)	80K-H protein [Homo sapiens]	AAA52493.1,AAH13586.2,BAG58917.1,EAW84216.1,NP_001001329.1,NP_001276032.1,NP_002734.2		59,049.2	100.0%	5	6	9	0.102%	10.1%
A1	HUH_A1	Cluster of RNH1 protein, partial [Homo sapiens] (AAH11186.1)	RNH1 protein, partial [Homo sapiens]	AAH11186.1,CAA32151.1,EAX02330.1,EAX02335.1,NP_002930.2		48,368.6	99.8%	1	1	2	0.0226%	3.13%
A1	HUH_A1	Cluster of glutamate dehydrogenase (NAD(P)+) [Homo sapiens] (CAA46995.1)	unnamed protein product [Homo sapiens]	BAG52930.1		55,954.0	55.2%	0	0	1	0.0113%	1.94%
A1	HUH_A1	Cluster of unr protein [Homo sapiens] (AAD27787.1)	unr protein [Homo sapiens]	AAD27787.1,BAB14073.1,CAH18231.1,NP_001007554.1,NP_001123995.1,NP_001229820.1,NP_009089.4		85,730.8	100.0%	7	7	9	0.102%	8.83%
A1	HUH_A1	Cluster of retrotransposon-derived protein PEG10 isoform 3 [Homo sapiens] (NP_001165908.1)	retrotransposon-derived protein PEG10 isoform 3 [Homo sapiens]	NP_001165908.1,NP_001171890.1		83,696.8	100.0%	7	7	11	0.124%	10.1%
A1	HUH_A1	Cluster of 4F2 cell-surface antigen heavy chain isoform b [Homo sapiens] (NP_001012680.1)	4F2 cell-surface antigen heavy chain isoform b [Homo sapiens]	NP_001012680.1,NP_001012682.1,NP_001013269.1,NP_002385.3		68,103.3	100.0%	7	7	8	0.0904%	12.2%
A1	HUH_A1	Cluster of cytokeratin 8 [Homo sapiens] (AAA35763.1)	vimentin [Homo sapiens]	NP_003371.2		53,652.7	100.0%	3	3	9	0.102%	10.5%
A1	HUH_A1	Cluster of signal transducer and activator of transcription 1 [Homo sapiens] (ADA59516.1)	signal transducer and activator of transcription 1 [Homo sapiens]	ADA59516.1,BAF85293.1,CAH18430.1,EAX10854.1,NP_009330.1,XP_014199518.1		87,336.9	100.0%	5	5	6	0.0678%	8.67%
A1	HUH_A1	Cluster of unnamed protein product [Homo sapiens] (BAG37313.1)	unnamed protein product [Homo sapiens]	BAG37313.1,BAH11971.1,BAH12337.1,NP_000692.2,NP_001153705.1,NP_001153706.1		109,553.6	100.0%	3	3	4	0.0452%	4.20%
A1	HUH_A1	Cluster of tubulin alpha 6 variant, partial [Homo sapiens] (BAD96744.1)	tubulin alpha 6 variant, partial [Homo sapiens]	BAD96744.1,NP_001290043.1,NP_001290045.1,NP_116093.1		49,823.4	88.1%	0	0	2	0.0226%	5.57%
A1	HUH_A1	Cluster of DNA-binding protein B, partial [Homo sapiens] (AAA35750.1)	DNA-binding protein B, partial [Homo sapiens]	AAA35750.1		39,977.4	26.1%	0	0	1	0.0113%	5.22%
A1	HUH_A1	Cluster of NF90 protein [Homo sapiens] (AAA20994.1)	NF90 protein [Homo sapiens]	AAA20994.1,AAD33966.1,AAD37575.1,AAD51098.1,AAD51099.1,AAK07424.1,AAK07425.1,AEE02018.1,AEE02019.1,AEE02020.1,BAF83894.1,CAA66918.1,EAW84133.1,EAW84135.1,NP_001131145.1,NP_004507.2,NP_036350.2,NP_060090.2,NP_703194.1,XP_006722805.1,XP_011526287.1		76,502.9	100.0%	2	2	4	0.0452%	3.73%
A1	HUH_A1	Cluster of unnamed protein product [Homo sapiens] (BAG65416.1)	unnamed protein product [Homo sapiens]	BAG62914.1		38,634.2	91.4%	0	0	3	0.0339%	7.78%
A1	HUH_A1	Cluster of unnamed protein product [Homo sapiens] (BAG36927.1)	unnamed protein product [Homo sapiens]	BAG36927.1,NP_000048.1,NP_001274176.1		144,476.3	100.0%	6	6	6	0.0678%	4.38%
A1	HUH_A1	Cluster of transportin [Homo sapiens] (AAC50723.1)	transportin [Homo sapiens]	AAC50723.1,NP_001351223.1,NP_002261.3,NP_694858.1,XP_005248558.1		102,358.8	100.0%	2	2	2	0.0226%	5.06%
A1	HUH_A1	Cluster of plakophilin-2 transcript variant 2b [Homo sapiens] (ACD03459.1)	plakophilin-2 transcript variant 2b [Homo sapiens]	ACD03459.1,ACD13292.1,ACD13293.1,CAA66264.1,CAA66265.1,NP_001005242.2,NP_004563.2		97,416.5	100.0%	5	5	5	0.0565%	5.79%
A1	HUH_A1	Cluster of DNA topoisomerase III [Homo sapiens] (AAB03695.1)	DNA topoisomerase III [Homo sapiens]	AAB03695.1,NP_004609.1		112,373.4	100.0%	12	12	17	0.192%	13.0%
A1	HUH_A1	Cluster of hypothetical protein, partial [Homo sapiens] (CAD39129.2)	hypothetical protein, partial [Homo sapiens]	CAD39129.2,EAW74069.1,EAW74085.1,NP_001073027.1		85,105.2	100.0%	2	2	2	0.0226%	2.88%
A1	HUH_A1	Cluster of cytokeratin 8 [Homo sapiens] (AAA35763.1)	type II keratin subunit protein, partial [Homo sapiens]	AAA36153.1		52,789.5	65.2%	0	0	25	0.282%	20.9%
A1	HUH_A1	Cluster of unnamed protein product [Homo sapiens] (BAG59150.1)	unnamed protein product [Homo sapiens]	BAG59150.1,NP_001191184.1,NP_005497.1		37,768.3	100.0%	2	2	2	0.0226%	6.87%
A1	HUH_A1	Cluster of cysteinyl-tRNA synthetase, partial [Homo sapiens] (AAA73901.1)	cysteinyl-tRNA synthetase, partial [Homo sapiens]	AAA73901.1,BAD96334.1,BAF82121.1,BAG58331.1,BAG60719.1,EAX02539.1,NP_001014437.1,NP_001181926.1,NP_001742.1,NP_644802.1,XP_006718404.1,XP_016873878.1,XP_016873880.1,XP_016873881.1,XP_024304469.1,XP_024304470.1,XP_024304471.1,XP_024304472.1,XP_024304473.1		0.0	100.0%	2	2	2	0.0226%	3.53%
A1	HUH_A1	Cluster of heat shock protein HSP 90-beta isoform c [Homo sapiens] (NP_001258901.1)	heat shock protein HSP 90-beta isoform c [Homo sapiens]	NP_001258901.1,NP_031381.2		82,323.2	100.0%	20	25	180	2.03%	55.3%
A1	HUH_A1	Cluster of Valosin-containing protein [Homo sapiens] (AAI21795.1)	Valosin-containing protein [Homo sapiens]	AAI21795.1,BAG35235.1,NP_009057.1		89,346.8	100.0%	14	15	28	0.316%	21.5%
A1	HUH_A1	Cluster of M4 protein deletion mutant [Homo sapiens] (AAC16002.1)	M4 protein deletion mutant [Homo sapiens]	AAC16002.1		73,562.4	100.0%	26	36	67	0.757%	40.7%
A1	HUH_A1	Cluster of dipeptidylpeptidase III isoform 1 variant, partial [Homo sapiens] (BAD96286.1)	dipeptidylpeptidase III isoform 1 variant, partial [Homo sapiens]	BAD96286.1,BAD96567.1,CAB72433.1,CAI46122.1,EAW74538.1,EAW74540.1,EAW74541.1,EAW74544.1,NP_005691.2		82,619.6	100.0%	3	3	3	0.0339%	3.39%
A1	HUH_A1	Cluster of TARS protein, partial [Homo sapiens] (AAH88355.1)	TARS protein, partial [Homo sapiens]	AAH88355.1,BAD96524.1,NP_001245367.1,NP_689508.3		83,437.8	100.0%	8	8	9	0.102%	11.6%
A1	HUH_A1	Cluster of transmembrane protein [Homo sapiens] (AAA85336.1)	transmembrane protein [Homo sapiens]	AAA85336.1,AAF73126.1,BAA04654.1,BAG35183.1,BAG59273.1,BAG61094.1,BAG61528.1,CAD97612.1,CAG33074.1,CAH18389.1,EAW99463.1,NP_001093639.1,NP_001093640.1,NP_006830.2,XP_005264167.1,XP_005264170.1,XP_005264171.1		83,679.0	100.0%	3	3	3	0.0339%	4.09%
A1	HUH_A1	Cluster of vacuolar sorting protein 35 [Homo sapiens] (AAF89953.1)	vacuolar sorting protein 35 [Homo sapiens]	AAF89953.1,AAH10362.1,BAA91790.1,CAB66822.1,NP_060676.2		91,710.0	100.0%	5	5	7	0.0791%	6.78%
A1	HUH_A1	Cluster of 3-methylcrotonyl-CoA carboxylase alpha subunit [Homo sapiens] (AAG50245.1)	3-methylcrotonyl-CoA carboxylase alpha subunit [Homo sapiens]	AAG50245.1,AAK67986.1,NP_064551.3,XP_011511294.1		80,473.6	100.0%	4	4	5	0.0565%	6.76%
A1	HUH_A1	Cluster of cytokeratin 8 [Homo sapiens] (AAA35763.1)	cytokeratin 8 [Homo sapiens]	AAA35763.1,AAH73760.1,BAF83627.1,EAW96651.1,EAW96654.1,NP_001243211.1,NP_002264.1		53,752.3	100.0%	11	13	69	0.780%	44.6%
A1	HUH_A1	Cluster of unnamed protein product [Homo sapiens] (BAB71252.1)	unnamed protein product [Homo sapiens]	BAB71252.1,EAW59783.1,NP_001156757.1,NP_001156758.1,NP_005234.1,NP_053733.2,XP_005261446.1,XP_005261447.1,XP_011528297.1,XP_011528298.1,XP_011528299.1,XP_011528300.1,XP_011528301.1,XP_011528302.1,XP_011528303.1,XP_016884133.1,XP_016884134.1,XP_016884135.1,XP_016884136.1,XP_016884137.1,XP_016884143.1,XP_016884144.1,XP_016884146.1,XP_016884147.1,XP_016884148.1,XP_016884150.1,XP_016884151.1		68,965.8	100.0%	3	3	5	0.0565%	7.83%
A1	HUH_A1	Cluster of GRP78 precursor, partial [Homo sapiens] (AAA52614.1)	unnamed protein product [Homo sapiens]	BAG53212.1		67,981.4	87.3%	0	0	3	0.0339%	4.35%
A1	HUH_A1	Cluster of unnamed protein product [Homo sapiens] (BAG65416.1)	unnamed protein product [Homo sapiens]	BAH13327.1,NP_001091.1		42,052.2	60.8%	0	0	2	0.0226%	4.96%
A1	HUH_A1	Cluster of cytokeratin 8 [Homo sapiens] (AAA35763.1)	epidermal cytokeratin 2 [Homo sapiens]	AAC83410.1,NP_000414.2		65,433.9	100.0%	5	5	15	0.169%	16.6%
A2	HUH_A2	Cluster of cytokeratin 8 [Homo sapiens] (AAA35763.1)	keratin 1 [Homo sapiens]	AFA52003.1		66,070.3	100.0%	5	5	39	0.643%	23.9%
A2	HUH_A2	Cluster of methylcrotonoyl-Coenzyme A carboxylase 2 (beta), isoform CRA_b [Homo sapiens] (EAW95692.1)	methylcrotonoyl-Coenzyme A carboxylase 2 (beta), isoform CRA_b [Homo sapiens]	EAW95692.1,NP_071415.1		61,334.7	100.0%	2	2	2	0.0330%	6.02%
A2	HUH_A2	Cluster of cytokeratin 8 [Homo sapiens] (AAA35763.1)	epidermal cytokeratin 2 [Homo sapiens]	AAC83410.1,NP_000414.2		65,433.9	100.0%	5	5	19	0.313%	16.1%
A2	HUH_A2	Cluster of U2 small nuclear RNA auxiliary factor 2 isoform b [Homo sapiens] (BAG70075.1)	U2 small nuclear RNA auxiliary factor 2 isoform b [Homo sapiens]	BAG70075.1,NP_001012496.1,NP_009210.1,XP_006723057.1,XP_011524712.1		53,501.2	100.0%	2	2	4	0.0659%	3.82%
A2	HUH_A2	Cluster of heat shock protein HSP 90-beta isoform c [Homo sapiens] (NP_001258901.1)	heat shock protein HSP 90-beta isoform c [Homo sapiens]	NP_001258901.1,NP_031381.2		83,267.3	13.1%	0	0	1	0.0165%	1.96%
A2	HUH_A2	Cluster of asparaginyl-tRNA synthetase variant, partial [Homo sapiens] (BAD96555.1)	asparaginyl-tRNA synthetase variant, partial [Homo sapiens]	BAD96555.1,NP_004530.1		62,944.3	100.0%	3	3	3	0.0494%	5.29%
A2	HUH_A2	Cluster of Chaperonin containing TCP1, subunit 3 (gamma) [Homo sapiens] (AAH08019.1)	Chaperonin containing TCP1, subunit 3 (gamma) [Homo sapiens]	AAH08019.1,BAD92119.1,BAG54323.1,CAA52808.1,NP_005989.3		60,535.4	100.0%	8	8	10	0.165%	16.4%
A2	HUH_A2	Cluster of GRP78 precursor, partial [Homo sapiens] (AAA52614.1)	unnamed protein product [Homo sapiens]	BAG53212.1		67,981.4	100.0%	3	3	5	0.0824%	8.70%
A2	HUH_A2	Cluster of RPN2 protein, partial [Homo sapiens] (AAH02380.2)	RPN2 protein, partial [Homo sapiens]	AAH02380.2,AAH13028.2,BAG38143.1,CAA68393.1,CAG33180.1,EAW76074.1,EAW76077.1,NP_001129243.1,NP_001311228.1,NP_001311230.1,NP_001311231.1,NP_001311232.1,NP_001311233.1,NP_001311234.1,NP_001311235.1,NP_002942.2,XP_006723914.1,XP_006723915.1		69,284.8	100.0%	4	4	4	0.0659%	11.2%
A2	HUH_A2	Cluster of elongation factor 2 [Homo sapiens] (NP_001952.1)	elongation factor 2 [Homo sapiens]	NP_001952.1		95,340.1	35.0%	0	0	0	0.000%	0.000%
A2	HUH_A2	Cluster of UDP-glucose 6-dehydrogenase isoform 2 [Homo sapiens] (NP_001171629.1)	UDP-glucose 6-dehydrogenase isoform 2 [Homo sapiens]	NP_001171629.1,NP_003350.1,XP_005262724.1		55,025.3	100.0%	6	6	6	0.0989%	15.9%
A2	HUH_A2	Cluster of alloalbumin Venezia [Homo sapiens] (AAA98798.1)	alloalbumin Venezia [Homo sapiens]	AAA98798.1,AAF01333.1,AAN17825.1,AEE60908.1,BAF85444.1,BAG37325.1,BAG60658.1,CAA23754.1,CAH18185.1,EAX05666.1,NP_000468.1		68,613.1	100.0%	5	5	15	0.247%	7.62%
A2	HUH_A2	Cluster of medium tumor antigen-associated 61-kD protein, partial [Homo sapiens] (AAA35531.1)	medium tumor antigen-associated 61-kD protein, partial [Homo sapiens]	AAA35531.1,AAA36399.1,BAF83282.1,BAG56718.1,BAG61093.1,CAG29336.1,NP_055040.2		65,309.7	100.0%	3	3	3	0.0494%	5.09%
A2	HUH_A2	Cluster of M4 protein deletion mutant [Homo sapiens] (AAC16002.1)	M4 protein deletion mutant [Homo sapiens]	AAC16002.1		73,562.4	100.0%	13	15	20	0.330%	18.2%
A2	HUH_A2	Cluster of DEAD box polypeptide 17 isoform p82 variant, partial [Homo sapiens] (BAD92832.1)	DEAD box polypeptide 17 isoform p82 variant, partial [Homo sapiens]	BAD92832.1,BAG64169.1,CAH10627.2,EAW60242.1,EAW60248.1,NP_001091974.1,NP_006377.2,XP_001092491.2,XP_003821639.1		80,274.0	39.2%	0	0	0	0.000%	0.000%
A2	HUH_A2	Cluster of nucleolin [Homo sapiens] (AAA59954.1)	nucleolin [Homo sapiens]	AAA59954.1,BAC03738.1,NP_005372.2		76,615.9	100.0%	1	1	1	0.0165%	1.27%
A2	HUH_A2	Cluster of KIAA0002 [Homo sapiens] (BAA02792.3)	KIAA0002 [Homo sapiens]	BAA02792.3,BAA07652.1,BAD96210.1,EAX09924.1,NP_006576.2		59,621.0	100.0%	11	11	17	0.280%	22.4%
A2	HUH_A2	Cluster of cytokeratin 8 [Homo sapiens] (AAA35763.1)	Keratin 6A [Homo sapiens]	AAH69269.1,BAF82934.1,BAG61372.1,EAW96630.1,NP_005545.1		59,917.3	100.0%	2	2	17	0.280%	15.4%
A2	HUH_A2	Cluster of unnamed protein product [Homo sapiens] (BAF83456.1)	unnamed protein product [Homo sapiens]	BAF83456.1,BAG70037.1,BAH11729.1,BAH13640.1,NP_001185771.1,NP_006422.1		57,489.9	100.0%	4	4	6	0.0989%	7.85%
A2	HUH_A2	Cluster of DNA-binding protein B, partial [Homo sapiens] (AAA35750.1)	DNA-binding protein B, partial [Homo sapiens]	AAA35750.1		39,977.4	90.2%	0	0	2	0.0330%	9.89%
A2	HUH_A2	Cluster of unnamed protein product [Homo sapiens] (BAG63336.1)	unnamed protein product [Homo sapiens]	BAG63336.1,CAB56010.2,EAW74162.1,NP_001276977.1,NP_056274.3,XP_006718556.1		60,543.2	100.0%	2	2	2	0.0330%	3.63%
A2	HUH_A2	Cluster of ER-60 protein [Homo sapiens] (AAC51518.1)	ER-60 protein [Homo sapiens]	AAC51518.1,BAA11928.1,BAG52151.1,CAA89996.1,EAW77234.1,EAW77235.1,NP_005304.3		56,681.5	100.0%	0	0	3	0.0494%	6.14%
A2	HUH_A2	Cluster of 40-kDa keratin protein, partial [Homo sapiens] (AAA36044.1)	keratin 18 variant, partial [Homo sapiens]	BAD96813.1,BAG36700.1,CAA31377.1,NP_000215.1		47,335.1	100.0%	5	5	9	0.148%	14.2%
A2	HUH_A2	Cluster of unnamed protein product [Homo sapiens] (BAG61884.1)	unnamed protein product [Homo sapiens]	BAG61884.1		41,185.3	100.0%	3	3	3	0.0494%	8.43%
A2	HUH_A2	Cluster of chaperonin containing TCP1, subunit 6A isoform a variant, partial [Homo sapiens] (BAD92965.1)	chaperonin containing TCP1, subunit 6A isoform a variant, partial [Homo sapiens]	BAD92965.1,BAG36555.1,NP_001753.1		57,763.0	100.0%	8	8	11	0.181%	17.6%
A2	HUH_A2	Cluster of cytokeratin 8 [Homo sapiens] (AAA35763.1)	cytokeratin 8 [Homo sapiens]	AAA35763.1,AAH73760.1,BAF83627.1,EAW96651.1,EAW96654.1,NP_001243211.1,NP_002264.1		57,809.5	100.0%	8	10	42	0.692%	39.2%
A2	HUH_A2	Cluster of tubulin alpha 6 variant, partial [Homo sapiens] (BAD96744.1)	tubulin alpha 6 variant, partial [Homo sapiens]	BAD96744.1,NP_001290043.1,NP_001290045.1,NP_116093.1		49,823.4	90.0%	0	0	2	0.0330%	5.35%
A2	HUH_A2	Cluster of unnamed protein product [Homo sapiens] (BAF83227.1)	unnamed protein product [Homo sapiens]	BAF83227.1,BAH13897.1,EAW99987.1,NP_001243650.1,NP_006421.2		57,926.0	100.0%	2	2	6	0.0989%	7.24%
A2	HUH_A2	Cluster of heterogeneous nuclear ribonucleoprotein K transcript variant [Homo sapiens] (AAW84289.1)	heterogeneous nuclear ribonucleoprotein K transcript variant [Homo sapiens]	AAW84289.1,BAD92799.1,EAW62679.1,EAW62680.1,NP_112553.1		51,030.4	100.0%	13	14	28	0.461%	34.3%
A2	HUH_A2	Cluster of heat shock protein 60 [Homo sapiens] (ABB01006.1)	heat shock protein 60 [Homo sapiens]	ABB01006.1,NP_002147.2		61,055.7	100.0%	4	4	77	1.27%	57.2%
A2	HUH_A2	Cluster of cytokeratin 9 [Homo sapiens] (CAA82315.1)	cytokeratin 9 [Homo sapiens]	CAA82315.1		62,131.0	100.0%	11	12	26	0.428%	23.1%
A2	HUH_A2	Cluster of unnamed protein product [Homo sapiens] (BAG37826.1)	unnamed protein product [Homo sapiens]	BAG37826.1,BAH12624.1,EAX01735.1,NP_001032411.1,NP_005142.1		54,770.8	100.0%	3	3	3	0.0494%	8.10%
A2	HUH_A2	Cluster of 40-kDa keratin protein, partial [Homo sapiens] (AAA36044.1)	Keratin 10 [Homo sapiens]	AAH34697.1,CAA32649.1,EAW60681.1,NP_000412.3,P13645.6,XP_005257400.1		58,828.8	100.0%	10	10	24	0.396%	23.1%
A2	HUH_A2	Cluster of GRP78 precursor, partial [Homo sapiens] (AAA52614.1)	GRP78 precursor, partial [Homo sapiens]	AAA52614.1,AAF13605.1,NP_005338.1,NP_071705.3		0.0	99.8%	1	1	2	0.0330%	2.91%
A2	HUH_A2	Cluster of polypyrimidine tract-binding protein 1 isoform c variant, partial [Homo sapiens] (BAD92147.1)	polypyrimidine tract-binding protein 1 isoform c variant, partial [Homo sapiens]	BAD92147.1		35,550.4	100.0%	4	4	4	0.0659%	15.5%
A2	HUH_A2	Cluster of mRNA-binding protein CRDBP [Homo sapiens] (AAF37203.1)	mRNA-binding protein CRDBP [Homo sapiens]	AAF37203.1,NP_006537.3,XP_005350688.1,XP_016879511.1		63,480.5	100.0%	9	9	14	0.231%	20.1%
A2	HUH_A2	Cluster of mRNA-binding protein CRDBP [Homo sapiens] (AAF37203.1)	putative RNA binding protein KOC [Homo sapiens]	AAC35208.1,NP_006538.2,XP_011513391.1		63,706.0	100.0%	2	2	5	0.0824%	5.35%
A2	HUH_A2	Cluster of cytokeratin 8 [Homo sapiens] (AAA35763.1)	Keratin 5 [Homo sapiens]	AAH24292.1,EAW96635.1,NP_000415.2		62,379.6	100.0%	3	3	13	0.214%	13.1%
A2	HUH_A2	Cluster of thyroid hormone binding protein precursor [Homo sapiens] (AAA61169.1)	thyroid hormone binding protein precursor [Homo sapiens]	AAA61169.1,NP_000909.2		57,118.1	100.0%	19	22	35	0.577%	40.4%
A2	HUH_A2	Cluster of 40-kDa keratin protein, partial [Homo sapiens] (AAA36044.1)	type I keratin 16 [Homo sapiens]	AAB35421.1,NP_005548.2		51,239.0	37.6%	0	0	12	0.198%	6.77%
A2	HUH_A2	Cluster of chaperonin containing TCP1, subunit 7 (eta) variant, partial [Homo sapiens] (BAD96198.1)	chaperonin containing TCP1, subunit 7 (eta) variant, partial [Homo sapiens]	BAD96198.1,NP_001159757.1,NP_006420.1		59,341.7	100.0%	12	12	13	0.214%	23.6%
A2	HUH_A2	Cluster of unnamed protein product [Homo sapiens] (BAF83082.1)	unnamed protein product [Homo sapiens]	BAF83082.1		59,731.4	100.0%	1	1	9	0.148%	17.4%
A2	HUH_A2	Cluster of cytokeratin 8 [Homo sapiens] (AAA35763.1)	vimentin [Homo sapiens]	NP_003371.2		53,652.7	100.0%	13	13	30	0.494%	41.4%
A2	HUH_A2	Cluster of AICAR formyltransferase/IMP cyclohydrolase bifunctional enzyme [Homo sapiens] (AAA97405.1)	AICAR formyltransferase/IMP cyclohydrolase bifunctional enzyme [Homo sapiens]	AAA97405.1,BAG35895.1,EAW70524.1,EAW70525.1,EAW70528.1,EAW70529.1,NP_004035.2,XP_016859676.1		64,616.5	100.0%	3	3	3	0.0494%	5.41%
A2	HUH_A2	Cluster of neuroleukin [Homo sapiens] (AAA36368.1)	neuroleukin [Homo sapiens]	AAA36368.1,AAF22645.1,ARJ36701.1,NP_000166.2,NP_001171651.1,NP_001276718.1,NP_001276719.1,NP_001316840.1		63,148.5	100.0%	2	2	2	0.0330%	3.05%
A2	HUH_A2	Cluster of 40-kDa keratin protein, partial [Homo sapiens] (AAA36044.1)	40-kDa keratin protein, partial [Homo sapiens]	AAA36044.1,NP_002267.2		44,107.1	90.4%	0	0	8	0.132%	5.75%
A2	HUH_A2	Cluster of pyruvate carboxylase precursor [Homo sapiens] (AAA82937.1)	pyruvate carboxylase precursor [Homo sapiens]	AAA82937.1,NP_071504.2		129,634.7	100.0%	4	4	4	0.0659%	3.57%
A2	HUH_A2	Cluster of WDR1 protein [Homo sapiens] (AAD05045.1)	WDR1 protein [Homo sapiens]	AAD05045.1,AAH00201.1,BAD92983.1,BAD96484.1,CAB43276.1,EAW92687.1,EAW92688.1,EAW92689.1,NP_059830.1,XP_016864369.1		72,081.5	100.0%	2	2	2	0.0330%	4.49%
A2	HUH_A2	Cluster of replication protein A 70 kDa DNA-binding subunit isoform 1 [Homo sapiens] (NP_002936.1)	replication protein A 70 kDa DNA-binding subunit isoform 1 [Homo sapiens]	NP_002936.1		68,139.0	100.0%	22	25	42	0.692%	40.3%
A2	HUH_A2	Cluster of RNH1 protein, partial [Homo sapiens] (AAH11186.1)	RNH1 protein, partial [Homo sapiens]	AAH11186.1,CAA32151.1,EAX02330.1,EAX02335.1,NP_002930.2		48,368.6	10.6%	0	0	0	0.000%	0.000%
A2	HUH_A2	Cluster of cytokeratin 8 [Homo sapiens] (AAA35763.1)	type II keratin subunit protein, partial [Homo sapiens]	AAA36153.1		52,789.5	63.6%	0	0	29	0.478%	21.1%
A2	HUH_A2	Cluster of t-complex polypeptide 1 [Homo sapiens] (CAA37064.1)	t-complex polypeptide 1 [Homo sapiens]	CAA37064.1,NP_110379.2		60,345.2	100.0%	8	8	9	0.148%	15.6%
A2	HUH_A2	Cluster of M2-type pyruvate kinase [Homo sapiens] (AAA36449.1)	M2-type pyruvate kinase [Homo sapiens]	AAA36449.1,AAH12811.3,BAD96647.1,CAA39849.1,NP_002645.3,XP_005254500.1,XP_006720633.1		57,878.4	100.0%	23	27	53	0.873%	49.0%
A2	HUH_A2	Cluster of coactivator activator [Homo sapiens] (AAK77961.1)	coactivator activator [Homo sapiens]	AAK77961.1,NP_006319.1		69,492.3	100.0%	15	16	32	0.527%	22.4%
A3	HUH_A3	Cluster of cytokeratin 8 [Homo sapiens] (AAA35763.1)	Keratin 5 [Homo sapiens]	AAH24292.1,EAW96635.1,NP_000415.2		62,379.6	100.0%	3	3	28	0.306%	14.4%
A3	HUH_A3	Cluster of heat shock protein HSP 90-beta isoform c [Homo sapiens] (NP_001258901.1)	heat shock 90kDa protein 1, alpha [Homo sapiens]	ABC40730.1,NP_001017963.2,NP_005339.3,XP_011535020.1		98,078.0	43.7%	0	0	2	0.0219%	2.81%
A3	HUH_A3	Cluster of cytokeratin 8 [Homo sapiens] (AAA35763.1)	keratin 1 [Homo sapiens]	AFA52003.1		66,070.3	100.0%	6	7	94	1.03%	34.9%
A3	HUH_A3	Cluster of 40-kDa keratin protein, partial [Homo sapiens] (AAA36044.1)	keratin 18 variant, partial [Homo sapiens]	BAD96813.1,BAG36700.1,CAA31377.1,NP_000215.1		47,335.1	100.0%	14	16	38	0.415%	43.5%
A3	HUH_A3	Cluster of heat shock protein 60 [Homo sapiens] (ABB01006.1)	heat shock protein 60 [Homo sapiens]	ABB01006.1,NP_002147.2		61,055.7	100.0%	1	1	17	0.186%	21.0%
A3	HUH_A3	Cluster of SLC9A3R1 protein, partial [Homo sapiens] (AAH49220.1)	SLC9A3R1 protein, partial [Homo sapiens]	AAH49220.1,NP_004243.1		38,868.3	100.0%	6	6	7	0.0765%	16.1%
A3	HUH_A3	Cluster of cytokeratin 8 [Homo sapiens] (AAA35763.1)	Keratin 6A [Homo sapiens]	AAH69269.1,BAF82934.1,BAG61372.1,EAW96630.1,NP_005545.1		59,917.3	99.9%	1	1	40	0.437%	15.1%
A3	HUH_A3	Cluster of pyruvate carboxylase precursor [Homo sapiens] (AAA82937.1)	pyruvate carboxylase precursor [Homo sapiens]	AAA82937.1,NP_071504.2		129,634.7	100.0%	8	8	9	0.0984%	7.98%
A3	HUH_A3	Cluster of calcium/calmodulin-dependent protein kinase II delta [Homo sapiens] (AAX88806.1)	calcium/calmodulin-dependent protein kinase II delta [Homo sapiens]	AAX88806.1,NP_001308511.1,NP_742127.1		55,379.6	100.0%	2	2	2	0.0219%	4.29%
A3	HUH_A3	Cluster of cargo selection protein TIP47 [Homo sapiens] (AAC39751.1)	cargo selection protein TIP47 [Homo sapiens]	AAC39751.1,AAD11622.1,AAH05818.1,BAD96774.1,NP_001157661.1,NP_001157666.1,NP_005808.3		47,073.6	100.0%	3	3	4	0.0437%	7.60%
A3	HUH_A3	Cluster of serine hydroxymethyltransferase, partial [Homo sapiens] (AAA63258.1)	serine hydroxymethyltransferase, partial [Homo sapiens]	AAA63258.1,BAD97275.1,BAG58915.1,BAG64774.1,CAI46021.1,EAW96996.1,NP_001159829.1,NP_005403.2		55,994.7	100.0%	2	2	2	0.0219%	4.85%
A3	HUH_A3	Cluster of neuroleukin [Homo sapiens] (AAA36368.1)	neuroleukin [Homo sapiens]	AAA36368.1,AAF22645.1,ARJ36701.1,NP_000166.2,NP_001171651.1,NP_001276718.1,NP_001276719.1,NP_001316840.1		63,148.5	81.0%	1	1	1	0.0109%	1.25%
A3	HUH_A3	Cluster of Tat binding protein 7, TBP-7=transcriptional activator [human, Peptide, 458 aa] (AAB24841.1)	Tat binding protein 7, TBP-7=transcriptional activator [human, Peptide, 458 aa]	AAB24841.1,AAC32612.1,NP_006494.1,NP_694546.1		47,367.7	100.0%	4	4	6	0.0656%	7.42%
A3	HUH_A3	Cluster of HLA-B associated transcript 1 variant, partial [Homo sapiens] (BAD96632.1)	HLA-B associated transcript 1 variant, partial [Homo sapiens]	BAD96632.1,BAF31287.1,NP_004631.1		49,020.1	100.0%	3	3	5	0.0547%	10.0%
A3	HUH_A3	Cluster of heterogeneous nuclear ribonucleoprotein K transcript variant [Homo sapiens] (AAW84289.1)	heterogeneous nuclear ribonucleoprotein K transcript variant [Homo sapiens]	AAW84289.1,BAD92799.1,EAW62679.1,EAW62680.1,NP_112553.1		48,806.9	100.0%	3	3	3	0.0328%	7.97%
A3	HUH_A3	Cluster of unnamed protein product [Homo sapiens] (BAH14636.1)	beta-tubulin - human (fragment)	pir||I38369		48,879.6	100.0%	1	1	114	1.25%	54.7%
A3	HUH_A3	Cluster of Chromosome 3 open reading frame 37 [Homo sapiens] (AAH09993.1)	Chromosome 3 open reading frame 37 [Homo sapiens]	AAH09993.1,EAW79265.1,NP_064572.2		40,561.2	100.0%	9	10	12	0.131%	31.1%
A3	HUH_A3	Cluster of unnamed protein product [Homo sapiens] (BAF84256.1)	unnamed protein product [Homo sapiens]	BAF84256.1,NP_002884.1		47,820.0	100.0%	2	3	6	0.0656%	8.71%
A3	HUH_A3	Cluster of DNA-binding protein B, partial [Homo sapiens] (AAA35750.1)	DNA-binding protein A, partial [Homo sapiens]	AAA35749.1,AAA79243.1,AAH08801.1,NP_003642.3,XP_016875611.1		36,990.2	100.0%	1	1	29	0.317%	14.3%
A3	HUH_A3	Cluster of ruvB-like 2 isoform 2 [Homo sapiens] (NP_001308119.1)	ruvB-like 2 isoform 2 [Homo sapiens]	NP_001308119.1,NP_001308120.1,NP_006657.1		51,158.1	100.0%	4	4	4	0.0437%	11.7%
A3	HUH_A3	Cluster of p48 [Homo sapiens] (AAB38382.1)	p48 [Homo sapiens]	AAB38382.1,AAI21109.1,BAH14526.1,EAW60395.1,NP_001265518.1,NP_003923.2		41,332.4	100.0%	6	6	9	0.0984%	17.6%
A3	HUH_A3	Cluster of M2-type pyruvate kinase [Homo sapiens] (AAA36449.1)	M2-type pyruvate kinase [Homo sapiens]	AAA36449.1,AAH12811.3,BAD96647.1,CAA39849.1,NP_002645.3,XP_005254500.1,XP_006720633.1		57,878.4	100.0%	12	12	15	0.164%	32.0%
A3	HUH_A3	Cluster of 40-kDa keratin protein, partial [Homo sapiens] (AAA36044.1)	40-kDa keratin protein, partial [Homo sapiens]	AAA36044.1,NP_002267.2		44,107.1	100.0%	4	4	12	0.131%	16.5%
A3	HUH_A3	Cluster of RNA-binding motif, single-stranded-interacting protein 2 [Homo sapiens] (NP_002889.1)	RNA-binding motif, single-stranded-interacting protein 2 [Homo sapiens]	NP_002889.1,XP_005269116.1,XP_005269117.1,XP_005269118.1,XP_006719604.1,XP_006719605.1,XP_006719606.1,XP_011536941.1		43,959.0	100.0%	3	3	14	0.153%	14.0%
A3	HUH_A3	Cluster of tubulin alpha 6 variant, partial [Homo sapiens] (BAD96744.1)	tubulin alpha 6 variant, partial [Homo sapiens]	BAD96744.1,NP_001290043.1,NP_001290045.1,NP_116093.1		49,895.5	100.0%	0	0	105	1.15%	55.9%
A3	HUH_A3	Cluster of unnamed protein product [Homo sapiens] (BAF84660.1)	unnamed protein product [Homo sapiens]	BAF84660.1,NP_001407.1		46,155.3	100.0%	7	9	12	0.131%	17.5%
A3	HUH_A3	Cluster of UDP-glucose 6-dehydrogenase isoform 2 [Homo sapiens] (NP_001171629.1)	UDP-glucose 6-dehydrogenase isoform 2 [Homo sapiens]	NP_001171629.1,NP_003350.1,XP_005262724.1		55,025.3	100.0%	4	4	6	0.0656%	9.84%
A3	HUH_A3	Cluster of reticulocalbin 2, EF-hand calcium binding domain [Homo sapiens] (EAW99216.1)	reticulocalbin 2, EF-hand calcium binding domain [Homo sapiens]	EAW99216.1,NP_001258766.1,NP_002893.1		39,140.5	100.0%	3	3	4	0.0437%	9.43%
A3	HUH_A3	Cluster of 40-kDa keratin protein, partial [Homo sapiens] (AAA36044.1)	Keratin 10 [Homo sapiens]	AAH34697.1,CAA32649.1,EAW60681.1,NP_000412.3,P13645.6,XP_005257400.1		58,828.8	100.0%	17	18	55	0.601%	30.7%
A3	HUH_A3	Cluster of unnamed protein product [Homo sapiens] (BAH14636.1)	unnamed protein product [Homo sapiens]	BAB14016.1,BAG60466.1,NP_115914.1		46,701.9	100.0%	2	2	43	0.470%	33.6%
A3	HUH_A3	Cluster of glutamate dehydrogenase (NAD(P)+) [Homo sapiens] (CAA46995.1)	glutamate dehydrogenase (NAD(P)+) [Homo sapiens]	CAA46995.1,NP_036216.2		61,435.7	99.8%	0	0	7	0.0765%	7.17%
A3	HUH_A3	Cluster of unnamed protein product [Homo sapiens] (BAH14636.1)	unnamed protein product [Homo sapiens]	BAH14636.1		46,566.4	100.0%	1	1	118	1.29%	54.7%
A3	HUH_A3	Cluster of adenylosuccinate lyase [Homo sapiens] (AAC83935.1)	adenylosuccinate lyase [Homo sapiens]	AAC83935.1,NP_000017.1,NP_001304852.1,NP_001350769.1,XP_011528279.1,pir||I58109		54,890.5	100.0%	3	3	3	0.0328%	6.82%
A3	HUH_A3	Cluster of unnamed protein product [Homo sapiens] (BAH13803.1)	unnamed protein product [Homo sapiens]	BAH13803.1,BAH14790.1,NP_055577.1,XP_008966102.1		60,102.4	100.0%	2	2	2	0.0219%	4.63%
A3	HUH_A3	Cluster of Rab GDP dissociation inhibitor beta, partial [Homo sapiens] (AAD34588.1)	Rab GDP dissociation inhibitor beta, partial [Homo sapiens]	AAD34588.1,BAA03095.1,BAG59669.1,NP_001108628.1,NP_001485.2		45,621.5	100.0%	4	4	4	0.0437%	12.8%
A3	HUH_A3	Cluster of hCG2043289 [Homo sapiens] (EAW55223.1)	hCG2043289 [Homo sapiens]	EAW55223.1		43,669.1	100.0%	10	10	20	0.219%	30.3%
A3	HUH_A3	Cluster of 40-kDa keratin protein, partial [Homo sapiens] (AAA36044.1)	Keratin 14 [Homo sapiens]	AAH02690.1,AAH42437.1,NP_000517.3		51,562.5	100.0%	2	2	24	0.262%	22.7%
A3	HUH_A3	Cluster of alloalbumin Venezia [Homo sapiens] (AAA98798.1)	alloalbumin Venezia [Homo sapiens]	AAA98798.1,AAF01333.1,AAN17825.1,AEE60908.1,BAF85444.1,BAG37325.1,BAG60658.1,CAA23754.1,CAH18185.1,EAX05666.1,NP_000468.1		68,613.1	100.0%	5	6	12	0.131%	6.29%
A3	HUH_A3	Cluster of ER-60 protein [Homo sapiens] (AAC51518.1)	ER-60 protein [Homo sapiens]	AAC51518.1,BAA11928.1,BAG52151.1,CAA89996.1,EAW77234.1,EAW77235.1,NP_005304.3		54,965.6	100.0%	1	1	6	0.0656%	13.1%
A3	HUH_A3	Cluster of unnamed protein product [Homo sapiens] (BAH14636.1)	tubulin, beta, 4 [Homo sapiens]	AAP35617.1		88,383.0	100.0%	2	3	90	0.984%	20.5%
A3	HUH_A3	Cluster of HNRPH1 [Homo sapiens] (CAG33059.1)	HNRPH1 [Homo sapiens]	CAG33059.1,NP_001351155.1,NP_001351160.1,NP_001351171.1,NP_001351173.1,NP_005511.1		48,263.7	100.0%	4	4	18	0.197%	26.9%
A3	HUH_A3	Cluster of tat binding protein-1 (tbp-1) [Homo sapiens] (AAA36666.1)	tat binding protein-1 (tbp-1) [Homo sapiens]	AAA36666.1,AAB24840.1,AAI07805.1,BAD96205.1,BAF84585.1,NP_002795.2,XP_007997716.1,XP_016873515.1		49,205.0	100.0%	2	2	3	0.0328%	4.70%
A3	HUH_A3	Cluster of protein disulfide isomerase-related protein 5, partial [Homo sapiens] (AAB50217.1)	protein disulfide isomerase-related protein 5, partial [Homo sapiens]	AAB50217.1,BAC86977.1,BAG54757.1,BAH12614.1,NP_001269633.1,NP_001269634.1,NP_001269635.1,NP_001269636.1,NP_005733.1		53,929.9	100.0%	9	9	19	0.208%	29.2%
A3	HUH_A3	Cluster of ribosomal protein L4 variant, partial [Homo sapiens] (BAD92214.1)	ribosomal protein L4 variant, partial [Homo sapiens]	BAD92214.1,EAW77774.1,NP_000959.2		48,997.7	100.0%	10	10	19	0.208%	26.3%
A3	HUH_A3	Cluster of Na,K-ATPase beta subunit [Homo sapiens] (AAC50132.1)	Na,K-ATPase beta subunit [Homo sapiens]	AAC50132.1,BAG58822.1,BAH14414.1,CAG28544.1,EAW90833.1,NP_001668.1		35,062.9	100.0%	2	2	2	0.0219%	8.31%
A3	HUH_A3	Cluster of replication protein A 70 kDa DNA-binding subunit isoform 1 [Homo sapiens] (NP_002936.1)	replication protein A 70 kDa DNA-binding subunit isoform 1 [Homo sapiens]	NP_002936.1		68,139.0	100.0%	15	15	31	0.339%	28.1%
A3	HUH_A3	Cluster of nucleolin [Homo sapiens] (AAA59954.1)	nucleolin [Homo sapiens]	AAA59954.1,BAC03738.1,NP_005372.2		74,326.1	77.1%	0	0	0	0.000%	0.000%
A3	HUH_A3	Cluster of coactivator activator [Homo sapiens] (AAK77961.1)	coactivator activator [Homo sapiens]	AAK77961.1,NP_006319.1		69,492.3	100.0%	4	4	5	0.0547%	8.22%
A3	HUH_A3	Cluster of dihydrolipoamide succinyltransferase [Homo sapiens] (AAB59629.1)	dihydrolipoamide succinyltransferase [Homo sapiens]	AAB59629.1,BAA03871.1,BAA05536.1,CAG33008.1,NP_001924.2		48,680.1	100.0%	2	2	3	0.0328%	4.86%
A3	HUH_A3	Cluster of heat shock protein HSP 90-beta isoform c [Homo sapiens] (NP_001258901.1)	heat shock protein HSP 90-beta isoform c [Homo sapiens]	NP_001258901.1,NP_031381.2		82,323.2	96.9%	0	0	3	0.0328%	5.04%
A3	HUH_A3	Cluster of thyroid hormone binding protein precursor [Homo sapiens] (AAA61169.1)	thyroid hormone binding protein precursor [Homo sapiens]	AAA61169.1,NP_000909.2		57,118.1	100.0%	7	8	9	0.0984%	13.6%
A3	HUH_A3	Cluster of mitochondrial ATP synthase, H+ transporting F1 complex beta subunit, partial [Homo sapiens] (ABD77240.1)	mitochondrial ATP synthase, H+ transporting F1 complex beta subunit, partial [Homo sapiens]	ABD77240.1,NP_001677.2		56,560.6	100.0%	1	2	47	0.514%	38.0%
A3	HUH_A3	Cluster of unnamed protein product [Homo sapiens] (BAG65416.1)	unnamed protein product [Homo sapiens]	BAG65416.1		39,800.5	6.0%	0	0	11	0.120%	23.6%
A3	HUH_A3	Cluster of cytokeratin 9 [Homo sapiens] (CAA82315.1)	cytokeratin 9 [Homo sapiens]	CAA82315.1		62,131.0	100.0%	16	18	40	0.437%	33.4%
A3	HUH_A3	Cluster of lung cancer-related protein 9 [Homo sapiens] (AAO85219.1)	lung cancer-related protein 9 [Homo sapiens]	AAO85219.1,EAW63577.1,EAW63580.1,NP_001171062.1,NP_002708.1,XP_005273616.1,XP_024302954.1		51,693.4	100.0%	2	2	3	0.0328%	5.15%
A3	HUH_A3	Cluster of epididymis luminal protein 9 [Homo sapiens] (ACF94471.1)	aldehyde dehydrogenase [Homo sapiens]	AAA51693.1,AAT41621.1,BAD97093.1,NP_000681.2		56,353.3	100.0%	8	8	12	0.131%	20.9%
A3	HUH_A3	Cluster of EEF1A1 protein [Homo sapiens] (AAH71619.1)	EEF1A1 protein [Homo sapiens]	AAH71619.1		47,869.6	100.0%	0	0	15	0.164%	16.8%
A3	HUH_A3	Cluster of unnamed protein product [Homo sapiens] (BAF83227.1)	unnamed protein product [Homo sapiens]	BAF83227.1,BAH13897.1,EAW99987.1,NP_001243650.1,NP_006421.2		57,926.0	100.0%	2	2	2	0.0219%	5.38%
A3	HUH_A3	Cluster of bromodomain adjacent to zinc finger domain 1A [Homo sapiens] (BAA89209.1)	bromodomain adjacent to zinc finger domain 1A [Homo sapiens]	BAA89209.1		190,850.9	95.0%	1	1	2	0.0219%	0.478%
A3	HUH_A3	Cluster of unnamed protein product [Homo sapiens] (BAG35394.1)	unnamed protein product [Homo sapiens]	BAG35394.1,BAH11461.1,NP_000169.1		52,385.9	100.0%	3	3	3	0.0328%	6.96%
A3	HUH_A3	Cluster of tubulin alpha 6 variant, partial [Homo sapiens] (BAD96744.1)	alpha-tubulin, partial [Homo sapiens]	CAA30026.1,NP_001265481.1		48,329.0	100.0%	1	1	68	0.743%	50.8%
A3	HUH_A3	Cluster of bleomycin hydrolase variant, partial [Homo sapiens] (BAD97123.1)	bleomycin hydrolase variant, partial [Homo sapiens]	BAD97123.1,BAG63365.1,NP_000377.1		52,590.5	100.0%	2	2	3	0.0328%	5.27%
A3	HUH_A3	Cluster of ataxin-10 isoform 1 [Homo sapiens] (NP_037368.1)	ataxin-10 isoform 1 [Homo sapiens]	NP_037368.1		53,490.8	100.0%	11	12	13	0.142%	28.0%
A3	HUH_A3	Cluster of enolase 1 variant, partial [Homo sapiens] (BAD96912.1)	gamma enolase, partial [Homo sapiens]	AAA52388.1,BAH12015.1,CAA31512.1,NP_001966.1		42,708.4	99.9%	1	1	14	0.153%	12.0%
A3	HUH_A3	Cluster of unnamed protein product [Homo sapiens] (BAF83456.1)	unnamed protein product [Homo sapiens]	BAF83456.1,BAG70037.1,BAH11729.1,BAH13640.1,NP_001185771.1,NP_006422.1		57,489.9	99.4%	1	1	2	0.0219%	2.24%
A3	HUH_A3	Cluster of unnamed protein product [Homo sapiens] (BAH14636.1)	class II beta tubulin isotype [Homo sapiens]	AAN85571.1,NP_001060.1		49,907.1	100.0%	1	1	107	1.17%	52.1%
A3	HUH_A3	Cluster of Hydroxyacyl-Coenzyme A dehydrogenase/3-ketoacyl-Coenzyme A thiolase/enoyl-Coenzyme A hydratase (trifunctional protein), beta subunit [Homo sapiens] (AAH14572.1)	Hydroxyacyl-Coenzyme A dehydrogenase/3-ketoacyl-Coenzyme A thiolase/enoyl-Coenzyme A hydratase (trifunctional protein), beta subunit [Homo sapiens]	AAH14572.1,NP_000174.1,NP_001268442.1,XP_024308598.1		51,296.0	100.0%	3	3	6	0.0656%	7.79%
A3	HUH_A3	Cluster of unnamed protein product [Homo sapiens] (BAG65416.1)	beta-actin-like protein 2 [Homo sapiens]	NP_001017992.1		42,004.2	49.1%	0	0	3	0.0328%	6.12%
A3	HUH_A3	Cluster of EEF1A1 protein [Homo sapiens] (AAH71619.1)	elongation factor 1 alpha, partial [Homo sapiens]	AAA52344.1		24,195.9	100.0%	1	1	7	0.0765%	29.1%
A3	HUH_A3	Cluster of Eukaryotic translation elongation factor 1 gamma [Homo sapiens] (AAH13918.1)	Eukaryotic translation elongation factor 1 gamma [Homo sapiens]	AAH13918.1,NP_001395.1		50,119.4	100.0%	4	4	7	0.0765%	10.1%
A3	HUH_A3	Cluster of enolase 1 variant, partial [Homo sapiens] (BAD96912.1)	enolase 1 variant, partial [Homo sapiens]	BAD96912.1		47,198.2	100.0%	16	23	104	1.14%	57.8%
A3	HUH_A3	Cluster of KIAA0002 [Homo sapiens] (BAA02792.3)	KIAA0002 [Homo sapiens]	BAA02792.3,BAA07652.1,BAD96210.1,EAX09924.1,NP_006576.2		59,621.0	81.0%	1	1	1	0.0109%	2.55%
A3	HUH_A3	Cluster of ribonucleoprotein La, partial [Homo sapiens] (AAA36577.1)	ribonucleoprotein La, partial [Homo sapiens]	AAA36577.1,BAG70165.1,NP_003133.1		46,839.0	100.0%	9	9	14	0.153%	29.9%
A3	HUH_A3	Cluster of cytokeratin 8 [Homo sapiens] (AAA35763.1)	cytokeratin 8 [Homo sapiens]	AAA35763.1,AAH73760.1,BAF83627.1,EAW96651.1,EAW96654.1,NP_001243211.1,NP_002264.1		57,809.5	100.0%	21	32	300	3.28%	68.7%
A3	HUH_A3	Cluster of calreticulin precursor variant, partial [Homo sapiens] (BAD96780.1)	calreticulin precursor variant, partial [Homo sapiens]	BAD96780.1,EAW84330.1,NP_004334.1		46,920.1	100.0%	3	3	6	0.0656%	8.13%
A3	HUH_A3	Cluster of glutamate dehydrogenase (NAD(P)+) [Homo sapiens] (CAA46995.1)	unnamed protein product [Homo sapiens]	BAG52930.1		55,954.0	100.0%	1	1	8	0.0875%	12.2%
A3	HUH_A3	Cluster of unnamed protein product [Homo sapiens] (BAG60373.1)	unnamed protein product [Homo sapiens]	BAG60373.1		21,031.0	100.0%	2	3	20	0.219%	22.8%
A3	HUH_A3	Cluster of RTN4 protein [Homo sapiens] (AAH71848.1)	RTN4 protein [Homo sapiens]	AAH71848.1,BAA83712.1,NP_722550.1		40,318.7	100.0%	3	3	4	0.0437%	12.0%
A3	HUH_A3	Cluster of epididymis luminal protein 9 [Homo sapiens] (ACF94471.1)	epididymis luminal protein 9 [Homo sapiens]	ACF94471.1,NP_000680.2		54,862.8	100.0%	11	11	21	0.230%	26.9%
A3	HUH_A3	Cluster of retrotransposon-derived protein PEG10 isoform 3 [Homo sapiens] (NP_001165908.1)	retrotransposon-derived protein PEG10 isoform 3 [Homo sapiens]	NP_001165908.1,NP_001171890.1		88,281.1	100.0%	7	10	15	0.164%	10.6%
A3	HUH_A3	Cluster of D-3-phosphoglycerate dehydrogenase [Homo sapiens] (NP_006614.2)	D-3-phosphoglycerate dehydrogenase [Homo sapiens]	NP_006614.2,XP_011539528.1		56,650.6	100.0%	2	2	2	0.0219%	4.32%
A3	HUH_A3	Cluster of Single-stranded DNA binding protein 1 [Homo sapiens] (AAH93054.1)	Single-stranded DNA binding protein 1 [Homo sapiens]	AAH93054.1,NP_003134.1,XP_005250105.1		18,558.5	95.0%	1	1	1	0.0109%	5.41%
A3	HUH_A3	Cluster of cytokeratin 8 [Homo sapiens] (AAA35763.1)	vimentin [Homo sapiens]	NP_003371.2		53,652.7	100.0%	9	10	33	0.361%	24.7%
A3	HUH_A3	Cluster of unknown, partial [Homo sapiens] (AAY40922.1)	unknown, partial [Homo sapiens]	AAY40922.1,CAB53741.2,NP_060713.1		49,399.1	99.9%	1	1	2	0.0219%	5.99%
A3	HUH_A3	Cluster of RNH1 protein, partial [Homo sapiens] (AAH11186.1)	RNH1 protein, partial [Homo sapiens]	AAH11186.1,CAA32151.1,EAX02330.1,EAX02335.1,NP_002930.2		48,368.6	99.9%	1	1	1	0.0109%	3.13%
A3	HUH_A3	Cluster of DNA-binding protein B, partial [Homo sapiens] (AAA35750.1)	DNA-binding protein B, partial [Homo sapiens]	AAA35750.1		39,977.4	100.0%	1	1	87	0.951%	40.7%
A3	HUH_A3	Cluster of ribosomal protein L3, isoform CRA_f [Homo sapiens] (EAW60315.1)	ribosomal protein L3, isoform CRA_f [Homo sapiens]	EAW60315.1		48,818.8	99.3%	1	1	1	0.0109%	1.63%
A3	HUH_A3	Cluster of lanosterol 14-alpha demethylase [Homo sapiens] (AAC50951.1)	lanosterol 14-alpha demethylase [Homo sapiens]	AAC50951.1,AAH32322.1,BAG36881.1,BAG52338.1,NP_000777.1,Q16850.3		56,808.5	100.0%	2	2	2	0.0219%	4.37%
A3	HUH_A3	Cluster of unnamed protein product [Homo sapiens] (BAG65416.1)	unnamed protein product [Homo sapiens]	BAG62914.1		38,634.2	98.4%	0	0	10	0.109%	21.0%
A3	HUH_A3	Cluster of chaperonin containing TCP1, subunit 7 (eta) variant, partial [Homo sapiens] (BAD96198.1)	chaperonin containing TCP1, subunit 7 (eta) variant, partial [Homo sapiens]	BAD96198.1,NP_001159757.1,NP_006420.1		59,341.7	73.2%	1	1	1	0.0109%	1.66%
A3	HUH_A3	Cluster of mRNA-binding protein CRDBP [Homo sapiens] (AAF37203.1)	mRNA-binding protein CRDBP [Homo sapiens]	AAF37203.1,NP_006537.3,XP_005350688.1,XP_016879511.1		63,480.5	100.0%	4	4	7	0.0765%	6.93%
A3	HUH_A3	Cluster of heterogeneous nuclear ribonucleoprotein D (AU-rich element RNA binding protein 1, 37kDa), isoform CRA_f [Homo sapiens] (EAX05879.1)	heterogeneous nuclear ribonucleoprotein D (AU-rich element RNA binding protein 1, 37kDa), isoform CRA_f [Homo sapiens]	EAX05879.1		30,255.2	100.0%	1	1	2	0.0219%	7.58%
A3	HUH_A3	Cluster of cytokeratin 8 [Homo sapiens] (AAA35763.1)	type II keratin subunit protein, partial [Homo sapiens]	AAA36153.1		52,789.5	99.9%	1	1	75	0.820%	27.8%
A3	HUH_A3	Cluster of HU-K4 [Homo sapiens] (AAB16799.1)	HU-K4 [Homo sapiens]	AAB16799.1,AAH00553.2,NP_001026866.1		54,706.0	100.0%	2	2	2	0.0219%	5.03%
A3	HUH_A3	Cluster of ATP synthase, H+ transporting, mitochondrial F1 complex, alpha subunit 1, cardiac muscle [Homo sapiens] (AAH11384.1)	ATP synthase, H+ transporting, mitochondrial F1 complex, alpha subunit 1, cardiac muscle [Homo sapiens]	AAH11384.1,AAH39135.2,NP_004037.1,XP_016881278.1		59,752.1	100.0%	5	5	6	0.0656%	11.2%
A3	HUH_A3	Cluster of glutathione reductase, isoform CRA_a [Homo sapiens] (EAW63442.1)	glutathione reductase, isoform CRA_a [Homo sapiens]	EAW63442.1,NP_000628.2,NP_001182031.1,NP_001182032.1,NP_001182033.1		56,257.4	100.0%	4	4	6	0.0656%	10.1%
A3	HUH_A3	Cluster of 6-phosphogluconate dehydrogenase, decarboxylating isoform 3 [Homo sapiens] (NP_001291381.1)	6-phosphogluconate dehydrogenase, decarboxylating isoform 3 [Homo sapiens]	NP_001291381.1,NP_002622.2		53,141.9	100.0%	13	13	24	0.262%	32.1%
A3	HUH_A3	Cluster of M4 protein deletion mutant [Homo sapiens] (AAC16002.1)	M4 protein deletion mutant [Homo sapiens]	AAC16002.1		73,562.4	100.0%	6	7	9	0.0984%	7.96%
A3	HUH_A3	Cluster of 40-kDa keratin protein, partial [Homo sapiens] (AAA36044.1)	type I keratin 16 [Homo sapiens]	AAB35421.1,NP_005548.2		51,239.0	100.0%	4	4	26	0.284%	22.2%
A3	HUH_A3	Cluster of RNA-binding protein 45 isoform 2 [Homo sapiens] (NP_001352508.1)	RNA-binding protein 45 isoform X1 [Homo sapiens]	XP_016858809.1		68,638.1	100.0%	1	1	14	0.153%	20.3%
A3	HUH_A3	Cluster of proteasome 26S non-ATPase subunit 12 isoform 1 variant, partial [Homo sapiens] (BAD96399.1)	proteasome 26S non-ATPase subunit 12 isoform 1 variant, partial [Homo sapiens]	BAD96399.1,NP_002807.1		52,906.2	100.0%	7	7	8	0.0875%	17.3%
A3	HUH_A3	Cluster of polyadenylate-binding protein 2 isoform 2 [Homo sapiens] (NP_001347480.1)	polyadenylate-binding protein 2 isoform 2 [Homo sapiens]	NP_001347480.1,NP_004634.1		32,749.5	100.0%	2	2	2	0.0219%	7.77%
A3	HUH_A3	Cluster of Aspartyl-tRNA synthetase [Homo sapiens] (AAI07750.1)	Aspartyl-tRNA synthetase [Homo sapiens]	AAI07750.1,AAX07827.1,BAD96196.1,EAX11618.1,NP_001280241.1,NP_001340.2		57,145.7	100.0%	3	3	3	0.0328%	8.18%
A3	HUH_A3	Cluster of tubulin alpha 6 variant, partial [Homo sapiens] (BAD96744.1)	hypothetical protein, partial [Homo sapiens]	CAD97815.1		53,970.3	100.0%	0	0	36	0.394%	34.7%
A3	HUH_A3	Cluster of unnamed protein product [Homo sapiens] (BAG65416.1)	unnamed protein product [Homo sapiens]	BAH13327.1,NP_001091.1		42,052.2	97.7%	0	0	5	0.0547%	12.5%
A3	HUH_A3	Cluster of cytokeratin 8 [Homo sapiens] (AAA35763.1)	epidermal cytokeratin 2 [Homo sapiens]	AAC83410.1,NP_000414.2		65,433.9	100.0%	11	11	54	0.590%	31.6%
A4	HUH_A4	Cluster of cytokeratin 8 [Homo sapiens] (AAA35763.1)	Keratin 5 [Homo sapiens]	AAH24292.1,EAW96635.1,NP_000415.2		62,379.6	73.0%	0	0	13	0.146%	5.76%
A4	HUH_A4	Cluster of hnRNP G protein [Homo sapiens] (CAA80599.1)	hnRNP G protein [Homo sapiens]	CAA80599.1,NP_002130.2		42,333.7	100.0%	0	0	21	0.235%	25.3%
A4	HUH_A4	Cluster of pyruvate carboxylase precursor [Homo sapiens] (AAA82937.1)	pyruvate carboxylase precursor [Homo sapiens]	AAA82937.1,NP_071504.2		129,650.7	100.0%	3	3	3	0.0336%	3.40%
A4	HUH_A4	Cluster of casein kinase II alpha 1 subunit isoform a, partial [Homo sapiens] (BAG70225.1)	casein kinase II alpha 1 subunit isoform a, partial [Homo sapiens]	BAG70225.1		45,132.4	100.0%	6	6	9	0.101%	16.6%
A4	HUH_A4	Cluster of cytokeratin 8 [Homo sapiens] (AAA35763.1)	keratin 1 [Homo sapiens]	AFA52003.1		66,070.3	100.0%	3	3	37	0.415%	23.1%
A4	HUH_A4	Cluster of heterogeneous nuclear ribonucleoprotein AB isoform a variant, partial [Homo sapiens] (BAD97145.1)	heterogeneous nuclear ribonucleoprotein AB isoform a variant, partial [Homo sapiens]	BAD97145.1,BAG60045.1,NP_004490.2,NP_112556.2		35,996.0	100.0%	4	4	14	0.157%	16.0%
A4	HUH_A4	Cluster of NF45 protein [Homo sapiens] (AAA20993.1)	NF45 protein [Homo sapiens]	AAA20993.1,AEE02017.1,BAD97046.1,NP_001125555.1,NP_080650.1		0.0	100.0%	2	2	4	0.0449%	5.17%
A4	HUH_A4	Cluster of Glutamic-oxaloacetic transaminase 2, mitochondrial (aspartate aminotransferase 2) [Homo sapiens] (AAH00525.1)	Glutamic-oxaloacetic transaminase 2, mitochondrial (aspartate aminotransferase 2) [Homo sapiens]	AAH00525.1,BAD96991.1,NP_002071.2		47,490.6	100.0%	3	3	4	0.0449%	8.60%
A4	HUH_A4	Cluster of 40-kDa keratin protein, partial [Homo sapiens] (AAA36044.1)	keratin 18 variant, partial [Homo sapiens]	BAD96813.1,BAG36700.1,CAA31377.1,NP_000215.1		47,335.1	100.0%	20	27	136	1.53%	52.1%
A4	HUH_A4	Cluster of protein disulfide isomerase-related protein 5, partial [Homo sapiens] (AAB50217.1)	protein disulfide isomerase-related protein 5, partial [Homo sapiens]	AAB50217.1,BAC86977.1,BAG54757.1,BAH12614.1,NP_001269633.1,NP_001269634.1,NP_001269635.1,NP_001269636.1,NP_005733.1		53,901.9	99.7%	1	1	1	0.0112%	3.33%
A4	HUH_A4	Cluster of medium-chain specific acyl-CoA dehydrogenase, mitochondrial isoform a precursor [Homo sapiens] (NP_000007.1)	medium-chain specific acyl-CoA dehydrogenase, mitochondrial isoform a precursor [Homo sapiens]	NP_000007.1,NP_001120800.1,NP_001272971.1,NP_001272972.1		50,272.2	100.0%	2	2	3	0.0336%	5.94%
A4	HUH_A4	Cluster of cytokeratin 8 [Homo sapiens] (AAA35763.1)	Keratin 6A [Homo sapiens]	AAH69269.1,BAF82934.1,BAG61372.1,EAW96630.1,NP_005545.1		59,917.3	57.6%	0	0	20	0.224%	9.22%
A4	HUH_A4	Cluster of activator of 90 kDa heat shock protein ATPase homolog 1 isoform 1 [Homo sapiens] (NP_036243.1)	activator of 90 kDa heat shock protein ATPase homolog 1 isoform 1 [Homo sapiens]	NP_036243.1		38,274.4	100.0%	5	5	5	0.0561%	11.5%
A4	HUH_A4	Cluster of unnamed protein product [Homo sapiens] (BAG37826.1)	unnamed protein product [Homo sapiens]	BAG37826.1,BAH12624.1,EAX01735.1,NP_001032411.1,NP_005142.1		56,070.3	96.6%	1	1	1	0.0112%	1.82%
A4	HUH_A4	Cluster of creatine kinase [Homo sapiens] (AAC31758.1)	creatine kinase [Homo sapiens]	AAC31758.1,CAG47064.1,NP_001814.2		42,619.0	100.0%	10	13	43	0.482%	38.3%
A4	HUH_A4	Cluster of poly(rC)-binding protein 2 isoform b variant, partial [Homo sapiens] (BAD92062.1)	hnRNP-E1 [Homo sapiens]	CAA55016.1		37,526.2	99.8%	1	1	3	0.0336%	6.18%
A4	HUH_A4	Cluster of unnamed protein product [Homo sapiens] (BAH11557.1)	unnamed protein product [Homo sapiens]	BAH11557.1,NP_002892.1		38,891.2	100.0%	2	2	2	0.0224%	6.79%
A4	HUH_A4	Cluster of TDP43 [Homo sapiens] (ABO32290.1)	TDP43 [Homo sapiens]	ABO32290.1,AER93385.1,BAD96474.1,BAG58707.1,BAG61425.1,NP_031401.1		44,739.7	100.0%	2	2	2	0.0224%	6.49%
A4	HUH_A4	Cluster of unnamed protein product [Homo sapiens] (BAH14636.1)	beta-tubulin - human (fragment)	pir||I38369		48,879.6	91.9%	0	0	22	0.247%	23.1%
A4	HUH_A4	Cluster of Chromosome 3 open reading frame 37 [Homo sapiens] (AAH09993.1)	Chromosome 3 open reading frame 37 [Homo sapiens]	AAH09993.1,EAW79265.1,NP_064572.2		40,561.2	100.0%	9	10	13	0.146%	31.1%
A4	HUH_A4	Cluster of S-adenosylhomocysteine hydrolase [Homo sapiens] (AAA51681.1)	S-adenosylhomocysteine hydrolase [Homo sapiens]	AAA51681.1,NP_000678.1		47,716.1	100.0%	4	4	8	0.0897%	9.26%
A4	HUH_A4	Cluster of mitogen-activated protein kinase kinase 1, isoform CRA_c [Homo sapiens] (EAW77767.1)	mitogen-activated protein kinase kinase 1, isoform CRA_c [Homo sapiens]	EAW77767.1,NP_002746.1,XP_011520085.1		43,440.2	100.0%	2	2	2	0.0224%	3.76%
A4	HUH_A4	Cluster of transcriptional activator protein Pur-beta [Homo sapiens] (NP_150093.1)	transcriptional activator protein Pur-beta [Homo sapiens]	NP_150093.1		33,241.9	100.0%	2	2	3	0.0336%	7.05%
A4	HUH_A4	Cluster of 40-kDa keratin protein, partial [Homo sapiens] (AAA36044.1)	40-kDa keratin protein, partial [Homo sapiens]	AAA36044.1,NP_002267.2		44,093.0	100.0%	26	34	275	3.08%	78.8%
A4	HUH_A4	Cluster of RNA-binding motif, single-stranded-interacting protein 2 [Homo sapiens] (NP_002889.1)	RNA-binding motif, single-stranded-interacting protein 2 [Homo sapiens]	NP_002889.1,XP_005269116.1,XP_005269117.1,XP_005269118.1,XP_006719604.1,XP_006719605.1,XP_006719606.1,XP_011536941.1		43,959.0	87.8%	0	0	1	0.0112%	2.46%
A4	HUH_A4	Cluster of unnamed protein product [Homo sapiens] (BAA91460.1)	unnamed protein product [Homo sapiens]	BAA91460.1,BAD96671.1,BAF83360.1,NP_037467.2,XP_008970267.1		46,291.8	100.0%	2	2	2	0.0224%	4.76%
A4	HUH_A4	Cluster of unnamed protein product [Homo sapiens] (BAF84660.1)	unnamed protein product [Homo sapiens]	BAF84660.1,NP_001407.1		46,155.3	100.0%	4	4	5	0.0561%	7.88%
A4	HUH_A4	Cluster of reticulocalbin 2, EF-hand calcium binding domain [Homo sapiens] (EAW99216.1)	reticulocalbin 2, EF-hand calcium binding domain [Homo sapiens]	EAW99216.1,NP_001258766.1,NP_002893.1		39,140.5	99.7%	1	1	2	0.0224%	4.04%
A4	HUH_A4	Cluster of 40-kDa keratin protein, partial [Homo sapiens] (AAA36044.1)	Keratin 10 [Homo sapiens]	AAH34697.1,CAA32649.1,EAW60681.1,NP_000412.3,P13645.6,XP_005257400.1		58,828.8	100.0%	7	7	38	0.426%	19.0%
A4	HUH_A4	Cluster of unnamed protein product [Homo sapiens] (BAH14636.1)	unnamed protein product [Homo sapiens]	BAB14016.1,BAG60466.1,NP_115914.1		46,701.9	78.3%	0	0	9	0.101%	9.64%
A4	HUH_A4	Cluster of Ribosomal protein L13 [Homo sapiens] (AAH66320.1)	Ribosomal protein L13 [Homo sapiens]	AAH66320.1,NP_150254.1		24,262.2	11.5%	0	0	0	0.000%	0.000%
A4	HUH_A4	Cluster of unnamed protein product [Homo sapiens] (BAH14636.1)	unnamed protein product [Homo sapiens]	BAH14636.1		46,566.4	100.0%	1	1	23	0.258%	28.0%
A4	HUH_A4	Cluster of 40-kDa keratin protein, partial [Homo sapiens] (AAA36044.1)	type I keratin 16 [Homo sapiens]	AAB35421.1,NP_005548.2		51,239.0	99.8%	1	1	50	0.561%	14.0%
A4	HUH_A4	Cluster of phosphoglycerate kinase 1 [Homo sapiens] (NP_000282.1)	phosphoglycerate kinase 1 [Homo sapiens]	NP_000282.1		44,615.3	100.0%	12	13	20	0.224%	32.9%
A4	HUH_A4	Cluster of DNA-binding protein B, partial [Homo sapiens] (AAA35750.1)	DNA-binding protein A, partial [Homo sapiens]	AAA35749.1,AAA79243.1,AAH08801.1,NP_003642.3,XP_016875611.1		36,990.2	82.2%	0	0	13	0.146%	9.71%
A4	HUH_A4	Cluster of 26S proteasome subunit 11, partial [Homo sapiens] (AAC64104.1)	26S proteasome subunit 11, partial [Homo sapiens]	AAC64104.1,AAD39843.1,BAD96615.1,BAG37274.1,EAW61235.1,EAW61237.1,EAW61238.1,NP_002808.3,NP_787128.2,XP_003806068.1		42,671.6	100.0%	3	3	3	0.0336%	7.18%
A4	HUH_A4	Cluster of M2-type pyruvate kinase [Homo sapiens] (AAA36449.1)	M2-type pyruvate kinase [Homo sapiens]	AAA36449.1,AAH12811.3,BAD96647.1,CAA39849.1,NP_002645.3,XP_005254500.1,XP_006720633.1		57,914.5	99.9%	1	1	1	0.0112%	2.45%
A4	HUH_A4	Cluster of poly(rC)-binding protein 2 isoform b variant, partial [Homo sapiens] (BAD92062.1)	poly(rC)-binding protein 2 isoform b variant, partial [Homo sapiens]	BAD92062.1,NP_001122384.1,NP_005007.2,NP_114366.1		38,151.5	100.0%	4	4	9	0.101%	16.9%
A4	HUH_A4	Cluster of hCG2043289 [Homo sapiens] (EAW55223.1)	hCG2043289 [Homo sapiens]	EAW55223.1		43,669.1	100.0%	2	2	2	0.0224%	4.88%
A4	HUH_A4	Cluster of P1.11659_4 [Homo sapiens] (AAC07983.1)	P1.11659_4 [Homo sapiens]	AAC07983.1,AAH10152.1,BAD96822.1,EAW58394.1,NP_001273960.1,NP_001273961.1,NP_038470.1		38,534.5	100.0%	4	4	5	0.0561%	14.6%
A4	HUH_A4	Cluster of alloalbumin Venezia [Homo sapiens] (AAA98798.1)	alloalbumin Venezia [Homo sapiens]	AAA98798.1,AAF01333.1,AAN17825.1,AEE60908.1,BAF85444.1,BAG37325.1,BAG60658.1,CAA23754.1,CAH18185.1,EAX05666.1,NP_000468.1		68,613.1	100.0%	6	6	11	0.123%	8.28%
A4	HUH_A4	Cluster of proteasome (prosome, macropain) 26S subunit, non-ATPase, 6, isoform CRA_c [Homo sapiens] (EAW65426.1)	proteasome (prosome, macropain) 26S subunit, non-ATPase, 6, isoform CRA_c [Homo sapiens]	EAW65426.1,NP_001258708.1,NP_001258709.1,NP_001258710.1,NP_055629.1,XP_005265676.1,XP_016863058.1		51,924.9	100.0%	3	3	3	0.0336%	9.33%
A4	HUH_A4	Cluster of hypothetical protein [Homo sapiens] (CAB66659.1)	hypothetical protein [Homo sapiens]	CAB66659.1,NP_006591.1,XP_011538832.1,XP_016855583.1,XP_016855584.1,XP_016855585.1,XP_024308254.1		38,210.6	100.0%	2	2	2	0.0224%	7.85%
A4	HUH_A4	Cluster of ER-60 protein [Homo sapiens] (AAC51518.1)	ER-60 protein [Homo sapiens]	AAC51518.1,BAA11928.1,BAG52151.1,CAA89996.1,EAW77234.1,EAW77235.1,NP_005304.3		54,965.6	73.0%	0	0	1	0.0112%	2.18%
A4	HUH_A4	Cluster of unnamed protein product [Homo sapiens] (BAH14636.1)	tubulin, beta, 4 [Homo sapiens]	AAP35617.1		88,383.0	94.2%	0	0	19	0.213%	10.0%
A4	HUH_A4	Cluster of elongation factor 2 [Homo sapiens] (NP_001952.1)	elongation factor 2 [Homo sapiens]	NP_001952.1		95,340.1	65.6%	1	1	1	0.0112%	1.17%
A4	HUH_A4	Cluster of 40-kDa keratin protein, partial [Homo sapiens] (AAA36044.1)	Keratin 14 [Homo sapiens]	AAH02690.1,AAH42437.1,NP_000517.3		51,562.5	40.2%	0	0	60	0.673%	12.5%
A4	HUH_A4	Cluster of MSTP086 [Homo sapiens] (AAQ13609.1)	MSTP086 [Homo sapiens]	AAQ13609.1,ALQ34249.1,BAC11519.1,NP_110416.1,NP_848695.1,NP_848696.1		41,490.9	10.9%	0	0	0	0.000%	0.000%
A4	HUH_A4	Cluster of cell cycle protein p38-2G4 homolog [Homo sapiens] (AAB91536.1)	cell cycle protein p38-2G4 homolog [Homo sapiens]	AAB91536.1,AAH19222.1,AAH32111.1,BAF84485.1,NP_006182.2,XP_016021275.1		43,786.7	100.0%	3	3	3	0.0336%	7.11%
A4	HUH_A4	Cluster of replication protein A 70 kDa DNA-binding subunit isoform 1 [Homo sapiens] (NP_002936.1)	replication protein A 70 kDa DNA-binding subunit isoform 1 [Homo sapiens]	NP_002936.1		68,139.0	100.0%	4	4	6	0.0673%	8.28%
A4	HUH_A4	Cluster of nucleolin [Homo sapiens] (AAA59954.1)	nucleolin [Homo sapiens]	AAA59954.1,BAC03738.1,NP_005372.2		74,326.1	60.1%	0	0	0	0.000%	0.000%
A4	HUH_A4	Cluster of erlin-2 isoform 1 [Homo sapiens] (NP_009106.1)	erlin-2 isoform 1 [Homo sapiens]	NP_009106.1		37,840.4	100.0%	3	3	3	0.0336%	10.6%
A4	HUH_A4	Cluster of acyl-CoA 6-desaturase isoform 1 [Homo sapiens] (NP_004256.1)	acyl-CoA 6-desaturase isoform 1 [Homo sapiens]	NP_004256.1		52,260.9	100.0%	4	4	7	0.0785%	10.1%
A4	HUH_A4	Cluster of EEF1A1 protein [Homo sapiens] (AAH71619.1)	EEF1A1 protein [Homo sapiens]	AAH71619.1		47,869.6	100.0%	0	0	24	0.269%	18.4%
A4	HUH_A4	Cluster of elongation factor Tu [Homo sapiens] (AAB00499.1)	elongation factor Tu [Homo sapiens]	AAB00499.1,AAC60647.1,NP_003312.3,P49411.2		49,875.8	100.0%	5	5	5	0.0561%	11.9%
A4	HUH_A4	Cluster of fructose-bisphosphate aldolase A isoform 2 [Homo sapiens] (NP_001230106.1)	fructose-bisphosphate aldolase A isoform 2 [Homo sapiens]	NP_001230106.1		45,261.2	100.0%	11	11	24	0.269%	36.8%
A4	HUH_A4	Cluster of heat shock protein HSP 90-beta isoform c [Homo sapiens] (NP_001258901.1)	heat shock protein HSP 90-beta isoform c [Homo sapiens]	NP_001258901.1,NP_031381.2		82,323.2	16.3%	0	0	1	0.0112%	1.40%
A4	HUH_A4	Cluster of mitochondrial ATP synthase, H+ transporting F1 complex beta subunit, partial [Homo sapiens] (ABD77240.1)	mitochondrial ATP synthase, H+ transporting F1 complex beta subunit, partial [Homo sapiens]	ABD77240.1,NP_001677.2		56,560.6	98.9%	0	0	3	0.0336%	8.09%
A4	HUH_A4	Cluster of aging-associated gene 7 protein [Homo sapiens] (AAV33303.1)	aging-associated gene 7 protein [Homo sapiens]	AAV33303.1,BAA21559.1,BAF83928.1,EAW49386.1,NP_001029097.1,NP_001310897.1,NP_001310898.1,NP_001310899.1,NP_003243.1		41,575.9	100.0%	2	2	3	0.0336%	8.56%
A4	HUH_A4	Cluster of Septin 2 [Homo sapiens] (AAH14455.1)	Septin 2 [Homo sapiens]	AAH14455.1,AAY14718.1,BAA05893.1,EAW71258.1,EAW71259.1,NP_001269901.1,NP_001269902.1,NP_001307958.1,NP_001336216.1,NP_001336231.1,NP_001336233.1,NP_004395.1,XP_024308688.1,XP_024308690.1		41,488.2	100.0%	4	4	5	0.0561%	14.1%
A4	HUH_A4	Cluster of unnamed protein product [Homo sapiens] (BAG65416.1)	unnamed protein product [Homo sapiens]	BAG65416.1		39,800.5	99.9%	1	1	156	1.75%	66.3%
A4	HUH_A4	Cluster of cytokeratin 9 [Homo sapiens] (CAA82315.1)	cytokeratin 9 [Homo sapiens]	CAA82315.1		62,131.0	61.8%	0	0	3	0.0336%	1.12%
A4	HUH_A4	Cluster of Hlark [Homo sapiens] (AAC51293.1)	Hlark [Homo sapiens]	AAC51293.1,AAH21120.1,BAF85494.1,BAG64902.1,EAW74554.1,EAW74555.1,EAW74556.1,NP_001185772.1,NP_001185773.1,NP_001273064.1,NP_002887.2,NP_113680.1		16,173.4	100.0%	3	3	4	0.0449%	6.56%
A4	HUH_A4	Cluster of epididymis luminal protein 9 [Homo sapiens] (ACF94471.1)	epididymis luminal protein 9 [Homo sapiens]	ACF94471.1,NP_000680.2		54,862.8	85.1%	0	0	1	0.0112%	1.60%
A4	HUH_A4	Cluster of tubulin alpha 6 variant, partial [Homo sapiens] (BAD96744.1)	alpha-tubulin, partial [Homo sapiens]	CAA30026.1,NP_001265481.1		49,793.4	100.0%	1	1	6	0.0673%	11.6%
A4	HUH_A4	Cluster of ataxin-10 isoform 1 [Homo sapiens] (NP_037368.1)	ataxin-10 isoform 1 [Homo sapiens]	NP_037368.1		53,490.8	99.9%	1	1	1	0.0112%	1.47%
A4	HUH_A4	Cluster of enolase 1 variant, partial [Homo sapiens] (BAD96912.1)	gamma enolase, partial [Homo sapiens]	AAA52388.1,BAH12015.1,CAA31512.1,NP_001966.1		42,708.4	39.2%	0	0	1	0.0112%	4.41%
A4	HUH_A4	Cluster of unnamed protein product [Homo sapiens] (BAF83456.1)	unnamed protein product [Homo sapiens]	BAF83456.1,BAG70037.1,BAH11729.1,BAH13640.1,NP_001185771.1,NP_006422.1		57,489.9	48.8%	0	0	0	0.000%	0.000%
A4	HUH_A4	Cluster of unnamed protein product [Homo sapiens] (BAH14636.1)	class II beta tubulin isotype [Homo sapiens]	AAN85571.1,NP_001060.1		49,907.1	84.2%	0	0	20	0.224%	21.1%
A4	HUH_A4	Cluster of putative mitochondrial inner membrane protein import receptor [Homo sapiens] (AAD01797.1)	putative mitochondrial inner membrane protein import receptor [Homo sapiens]	AAD01797.1,BAD96782.1,NP_006342.2		51,357.1	100.0%	2	2	2	0.0224%	5.54%
A4	HUH_A4	Cluster of unnamed protein product [Homo sapiens] (BAG65416.1)	beta-actin-like protein 2 [Homo sapiens]	NP_001017992.1		42,004.2	99.9%	1	1	54	0.606%	19.9%
A4	HUH_A4	Cluster of EEF1A1 protein [Homo sapiens] (AAH71619.1)	elongation factor 1 alpha, partial [Homo sapiens]	AAA52344.1		24,195.9	94.5%	0	0	9	0.101%	19.4%
A4	HUH_A4	Cluster of Eukaryotic translation elongation factor 1 gamma [Homo sapiens] (AAH13918.1)	Eukaryotic translation elongation factor 1 gamma [Homo sapiens]	AAH13918.1,NP_001395.1		50,119.4	100.0%	2	2	2	0.0224%	4.81%
A4	HUH_A4	Cluster of enolase 1 variant, partial [Homo sapiens] (BAD96912.1)	enolase 1 variant, partial [Homo sapiens]	BAD96912.1		47,198.2	100.0%	5	5	15	0.168%	23.0%
A4	HUH_A4	Cluster of BZW1 protein variant, partial [Homo sapiens] (BAD96965.1)	BZW1 protein variant, partial [Homo sapiens]	BAD96965.1,NP_001193997.1,NP_001193998.1,NP_001308622.1,NP_001308623.1,NP_055485.2		40,540.0	99.9%	1	1	3	0.0336%	4.25%
A4	HUH_A4	Cluster of Heterogeneous nuclear ribonucleoprotein C (C1/C2) [Homo sapiens] (AAH07052.1)	Heterogeneous nuclear ribonucleoprotein C (C1/C2) [Homo sapiens]	AAH07052.1		33,598.4	100.0%	5	5	11	0.123%	16.7%
A4	HUH_A4	Cluster of unnamed protein product [Homo sapiens] (BAH13585.1)	unnamed protein product [Homo sapiens]	BAH13585.1,NP_002070.1		46,248.1	100.0%	3	3	3	0.0336%	8.16%
A4	HUH_A4	Cluster of cytokeratin 8 [Homo sapiens] (AAA35763.1)	cytokeratin 8 [Homo sapiens]	AAA35763.1,AAH73760.1,BAF83627.1,EAW96651.1,EAW96654.1,NP_001243211.1,NP_002264.1		53,752.3	100.0%	16	20	109	1.22%	58.7%
A4	HUH_A4	Cluster of homologous yeast-44.2 protein [Homo sapiens] (AAD44500.1)	homologous yeast-44.2 protein [Homo sapiens]	AAD44500.1,CAB66481.1,NP_001315617.1,NP_037473.3		44,745.4	100.0%	3	3	5	0.0561%	6.82%
A4	HUH_A4	Cluster of calreticulin precursor variant, partial [Homo sapiens] (BAD96780.1)	calreticulin precursor variant, partial [Homo sapiens]	BAD96780.1,EAW84330.1,NP_004334.1		46,920.1	65.5%	1	1	1	0.0112%	3.45%
A4	HUH_A4	Cluster of unnamed protein product [Homo sapiens] (BAG60373.1)	unnamed protein product [Homo sapiens]	BAG60373.1		21,031.0	100.0%	2	3	6	0.0673%	22.8%
A4	HUH_A4	Cluster of retrotransposon-derived protein PEG10 isoform 3 [Homo sapiens] (NP_001165908.1)	retrotransposon-derived protein PEG10 isoform 3 [Homo sapiens]	NP_001165908.1,NP_001171890.1		83,696.8	96.6%	1	1	1	0.0112%	1.15%
A4	HUH_A4	Cluster of Single-stranded DNA binding protein 1 [Homo sapiens] (AAH93054.1)	Single-stranded DNA binding protein 1 [Homo sapiens]	AAH93054.1,NP_003134.1,XP_005250105.1		18,558.5	100.0%	2	2	2	0.0224%	15.5%
A4	HUH_A4	Cluster of cytokeratin 8 [Homo sapiens] (AAA35763.1)	vimentin [Homo sapiens]	NP_003371.2		53,652.7	100.0%	3	3	11	0.123%	10.5%
A4	HUH_A4	Cluster of mitochondrial acetoacetyl-CoA thiolase [Homo sapiens] (BAA01387.1)	mitochondrial acetoacetyl-CoA thiolase [Homo sapiens]	BAA01387.1,NP_000010.1		45,199.8	100.0%	6	6	7	0.0785%	14.8%
A4	HUH_A4	Cluster of Purine-rich element binding protein A [Homo sapiens] (AAH36087.1)	Purine-rich element binding protein A [Homo sapiens]	AAH36087.1,AAI10575.1,AAI10595.1,NP_005850.1		34,911.1	100.0%	1	1	50	0.561%	31.7%
A4	HUH_A4	Cluster of isocitrate dehydrogenase [NADP], mitochondrial isoform 2 [Homo sapiens] (NP_001276839.1)	isocitrate dehydrogenase [NADP], mitochondrial isoform 2 [Homo sapiens]	NP_001276839.1		45,180.9	100.0%	4	4	6	0.0673%	12.3%
A4	HUH_A4	Cluster of Serpin peptidase inhibitor, clade H (heat shock protein 47), member 1, (collagen binding protein 1) [Homo sapiens] (AAH70087.1)	Serpin peptidase inhibitor, clade H (heat shock protein 47), member 1, (collagen binding protein 1) [Homo sapiens]	AAH70087.1,BAA11829.1,BAF82813.1,BAG60149.1,CAA43795.1,EAW74978.1,NP_001226.2		40,684.7	100.0%	4	4	6	0.0673%	11.0%
A4	HUH_A4	Cluster of tubulin alpha 6 variant, partial [Homo sapiens] (BAD96744.1)	tubulin alpha 6 variant, partial [Homo sapiens]	BAD96744.1,NP_001290043.1,NP_001290045.1,NP_116093.1		49,823.4	99.7%	0	0	15	0.168%	20.7%
A4	HUH_A4	Cluster of RNH1 protein, partial [Homo sapiens] (AAH11186.1)	RNH1 protein, partial [Homo sapiens]	AAH11186.1,CAA32151.1,EAX02330.1,EAX02335.1,NP_002930.2		48,368.6	100.0%	7	7	12	0.135%	19.0%
A4	HUH_A4	Cluster of DNA-binding protein B, partial [Homo sapiens] (AAA35750.1)	DNA-binding protein B, partial [Homo sapiens]	AAA35750.1		39,977.4	100.0%	1	1	28	0.314%	36.5%
A4	HUH_A4	Cluster of low density lipoprotein receptor-related protein associated protein 1 variant, partial [Homo sapiens] (BAD96224.1)	low density lipoprotein receptor-related protein associated protein 1 variant, partial [Homo sapiens]	BAD96224.1,BAD96247.1,BAF85010.1,BAG35576.1,NP_002328.1		41,467.6	100.0%	4	4	4	0.0449%	8.68%
A4	HUH_A4	Cluster of ribosomal protein L3, isoform CRA_f [Homo sapiens] (EAW60315.1)	ribosomal protein L3, isoform CRA_f [Homo sapiens]	EAW60315.1		48,818.8	100.0%	3	3	7	0.0785%	6.51%
A4	HUH_A4	Cluster of unnamed protein product [Homo sapiens] (BAG65416.1)	unnamed protein product [Homo sapiens]	BAG62914.1		38,634.2	100.0%	0	0	142	1.59%	55.0%
A4	HUH_A4	Cluster of heterogeneous nuclear ribonucleoprotein D (AU-rich element RNA binding protein 1, 37kDa), isoform CRA_f [Homo sapiens] (EAX05879.1)	heterogeneous nuclear ribonucleoprotein D (AU-rich element RNA binding protein 1, 37kDa), isoform CRA_f [Homo sapiens]	EAX05879.1		30,255.2	100.0%	5	6	28	0.314%	24.5%
A4	HUH_A4	Cluster of cytokeratin 8 [Homo sapiens] (AAA35763.1)	type II keratin subunit protein, partial [Homo sapiens]	AAA36153.1		52,789.5	60.1%	0	0	30	0.336%	21.1%
A4	HUH_A4	Cluster of ATP synthase, H+ transporting, mitochondrial F1 complex, alpha subunit 1, cardiac muscle [Homo sapiens] (AAH11384.1)	ATP synthase, H+ transporting, mitochondrial F1 complex, alpha subunit 1, cardiac muscle [Homo sapiens]	AAH11384.1,AAH39135.2,NP_004037.1,XP_016881278.1		59,709.1	61.4%	0	0	0	0.000%	0.000%
A4	HUH_A4	Cluster of NADP-dependent isocitrate dehydrogenase [Homo sapiens] (AAD02918.1)	NADP-dependent isocitrate dehydrogenase [Homo sapiens]	AAD02918.1,BAG35175.1,CAD97653.1,NP_005887.2		46,660.5	100.0%	8	8	13	0.146%	24.4%
A4	HUH_A4	Cluster of 6-phosphogluconate dehydrogenase, decarboxylating isoform 3 [Homo sapiens] (NP_001291381.1)	6-phosphogluconate dehydrogenase, decarboxylating isoform 3 [Homo sapiens]	NP_001291381.1,NP_002622.2		53,141.9	100.0%	3	3	3	0.0336%	7.45%
A4	HUH_A4	Cluster of hnRNP G protein [Homo sapiens] (CAA80599.1)	RBM1, partial [Homo sapiens]	ABB92435.1,NP_062556.2		42,143.4	100.0%	1	1	14	0.157%	20.3%
A4	HUH_A4	Cluster of heat shock protein 60 [Homo sapiens] (ABB01006.1)	heat shock protein 60 [Homo sapiens]	ABB01006.1,NP_002147.2		61,055.7	90.6%	0	0	1	0.0112%	1.57%
A4	HUH_A4	Cluster of bromodomain adjacent to zinc finger domain 1A [Homo sapiens] (BAA89209.1)	bromodomain adjacent to zinc finger domain 1A [Homo sapiens]	BAA89209.1		190,850.9	99.9%	1	1	2	0.0224%	0.478%
A4	HUH_A4	Cluster of tubulin alpha 6 variant, partial [Homo sapiens] (BAD96744.1)	hypothetical protein, partial [Homo sapiens]	CAD97815.1		53,970.3	83.0%	0	0	2	0.0224%	4.80%
A4	HUH_A4	Cluster of unnamed protein product [Homo sapiens] (BAG65416.1)	unnamed protein product [Homo sapiens]	BAH13327.1,NP_001091.1		42,052.2	100.0%	1	2	107	1.20%	35.0%
A4	HUH_A4	Cluster of cytokeratin 8 [Homo sapiens] (AAA35763.1)	epidermal cytokeratin 2 [Homo sapiens]	AAC83410.1,NP_000414.2		65,433.9	100.0%	6	6	26	0.292%	20.6%
A5	HUH_A5	Cluster of cytokeratin 8 [Homo sapiens] (AAA35763.1)	Keratin 5 [Homo sapiens]	AAH24292.1,EAW96635.1,NP_000415.2		62,379.6	100.0%	5	5	16	0.210%	18.1%
A5	HUH_A5	Cluster of elongation factor 1-delta isoform 4 [Homo sapiens] (NP_001123528.1)	elongation factor 1-delta isoform 4 [Homo sapiens]	NP_001123528.1,NP_001951.2		28,557.9	100.0%	3	3	5	0.0656%	12.8%
A5	HUH_A5	Cluster of pyruvate carboxylase precursor [Homo sapiens] (AAA82937.1)	pyruvate carboxylase precursor [Homo sapiens]	AAA82937.1,NP_071504.2		129,634.7	9.4%	0	0	0	0.000%	0.000%
A5	HUH_A5	Cluster of SEC13-like 1 isoform b variant, partial [Homo sapiens] (BAD92791.1)	SEC13-like 1 isoform b variant, partial [Homo sapiens]	BAD92791.1,BAD96739.1,NP_001129498.1,NP_001129704.1,NP_109598.2,NP_899195.1,XP_016862509.2,XP_016862510.1,XP_024309469.1,XP_024309473.1		35,509.5	100.0%	2	2	2	0.0262%	6.93%
A5	HUH_A5	Cluster of arginase (EC 3.5.3.1) [Homo sapiens] (AAA51776.1)	arginase (EC 3.5.3.1) [Homo sapiens]	AAA51776.1,AAH05321.1,AAL71547.1,EAW48054.1,NP_000036.2,NP_001231367.1		35,665.2	100.0%	2	2	2	0.0262%	6.83%
A5	HUH_A5	Cluster of cytokeratin 8 [Homo sapiens] (AAA35763.1)	keratin 1 [Homo sapiens]	AFA52003.1		66,070.3	100.0%	5	6	61	0.800%	31.4%
A5	HUH_A5	Cluster of DNA-binding protein B, partial [Homo sapiens] (AAA35750.1)	DNA-binding protein A, partial [Homo sapiens]	AAA35749.1,AAA79243.1,AAH08801.1,NP_003642.3,XP_016875611.1		36,990.2	36.6%	0	0	1	0.0131%	4.13%
A5	HUH_A5	Cluster of heterogeneous nuclear ribonucleoprotein AB isoform a variant, partial [Homo sapiens] (BAD97145.1)	heterogeneous nuclear ribonucleoprotein AB isoform a variant, partial [Homo sapiens]	BAD97145.1,BAG60045.1,NP_004490.2,NP_112556.2		35,008.9	99.8%	1	1	5	0.0656%	7.23%
A5	HUH_A5	Cluster of 40-kDa keratin protein, partial [Homo sapiens] (AAA36044.1)	keratin 18 variant, partial [Homo sapiens]	BAD96813.1,BAG36700.1,CAA31377.1,NP_000215.1		47,335.1	100.0%	9	9	26	0.341%	28.8%
A5	HUH_A5	Cluster of aldo-keto reductase family 1 member C1 [Homo sapiens] (NP_001344.2)	aldo-keto reductase family 1 member C1 [Homo sapiens]	NP_001344.2,XP_016871280.1		36,789.1	100.0%	9	9	18	0.236%	20.7%
A5	HUH_A5	Cluster of cytokeratin 8 [Homo sapiens] (AAA35763.1)	Keratin 6A [Homo sapiens]	AAH69269.1,BAF82934.1,BAG61372.1,EAW96630.1,NP_005545.1		59,917.3	100.0%	2	2	17	0.223%	15.2%
A5	HUH_A5	Cluster of creatine kinase [Homo sapiens] (AAC31758.1)	creatine kinase [Homo sapiens]	AAC31758.1,CAG47064.1,NP_001814.2		42,619.0	100.0%	3	3	4	0.0525%	9.71%
A5	HUH_A5	Cluster of poly(rC)-binding protein 2 isoform b variant, partial [Homo sapiens] (BAD92062.1)	hnRNP-E1 [Homo sapiens]	CAA55016.1		37,526.2	100.0%	2	2	5	0.0656%	10.1%
A5	HUH_A5	Cluster of glyceraldehyde-3-phosphate dehydrogenase [Homo sapiens] (CAA25833.1)	glyceraldehyde-3-phosphate dehydrogenase [Homo sapiens]	CAA25833.1		36,054.4	100.0%	1	1	45	0.590%	42.4%
A5	HUH_A5	Cluster of Chromosome 3 open reading frame 37 [Homo sapiens] (AAH09993.1)	Chromosome 3 open reading frame 37 [Homo sapiens]	AAH09993.1,EAW79265.1,NP_064572.2		40,561.2	100.0%	10	11	17	0.223%	33.6%
A5	HUH_A5	Cluster of heterogeneous nuclear ribonucleoproteins A2/B1 isoform B1 [Homo sapiens] (NP_112533.1)	heterogeneous nuclear ribonucleoproteins A2/B1 isoform B1 [Homo sapiens]	NP_112533.1		37,430.3	100.0%	8	8	16	0.210%	28.3%
A5	HUH_A5	Cluster of musashi homolog 2 (Drosophila), isoform CRA_a [Homo sapiens] (EAW94506.1)	musashi homolog 2 (Drosophila), isoform CRA_a [Homo sapiens]	EAW94506.1,EAW94511.1,EAW94512.1,NP_001309179.1,NP_001309180.1,NP_620412.1,NP_733839.1,XP_004645331.1,XP_005257072.1,XP_016879637.1		35,196.8	100.0%	3	3	4	0.0525%	13.3%
A5	HUH_A5	Cluster of 40-kDa keratin protein, partial [Homo sapiens] (AAA36044.1)	40-kDa keratin protein, partial [Homo sapiens]	AAA36044.1,NP_002267.2		44,107.1	100.0%	12	12	48	0.630%	46.8%
A5	HUH_A5	Cluster of 40-kDa keratin protein, partial [Homo sapiens] (AAA36044.1)	Keratin 10 [Homo sapiens]	AAH34697.1,CAA32649.1,EAW60681.1,NP_000412.3,P13645.6,XP_005257400.1		58,828.8	100.0%	12	12	40	0.525%	25.0%
A5	HUH_A5	Cluster of Ribosomal protein L13 [Homo sapiens] (AAH66320.1)	Ribosomal protein L13 [Homo sapiens]	AAH66320.1,NP_150254.1		24,262.2	100.0%	2	2	2	0.0262%	8.06%
A5	HUH_A5	Cluster of tubulin alpha 6 variant, partial [Homo sapiens] (BAD96744.1)	tubulin alpha 6 variant, partial [Homo sapiens]	BAD96744.1,NP_001290043.1,NP_001290045.1,NP_116093.1		49,823.4	85.4%	0	0	2	0.0262%	5.12%
A5	HUH_A5	Cluster of unnamed protein product [Homo sapiens] (BAF83743.1)	unnamed protein product [Homo sapiens]	BAF83743.1,EAW76288.1,EAW76291.1,NP_031393.2		30,364.4	100.0%	6	6	10	0.131%	19.2%
A5	HUH_A5	Cluster of poly(rC)-binding protein 2 isoform b variant, partial [Homo sapiens] (BAD92062.1)	poly(rC)-binding protein 2 isoform b variant, partial [Homo sapiens]	BAD92062.1,NP_001122384.1,NP_005007.2,NP_114366.1		38,151.5	100.0%	4	4	5	0.0656%	17.4%
A5	HUH_A5	Cluster of alloalbumin Venezia [Homo sapiens] (AAA98798.1)	alloalbumin Venezia [Homo sapiens]	AAA98798.1,AAF01333.1,AAN17825.1,AEE60908.1,BAF85444.1,BAG37325.1,BAG60658.1,CAA23754.1,CAH18185.1,EAX05666.1,NP_000468.1		68,613.1	100.0%	4	4	7	0.0918%	5.79%
A5	HUH_A5	Cluster of replication protein A 70 kDa DNA-binding subunit isoform 1 [Homo sapiens] (NP_002936.1)	replication protein A 70 kDa DNA-binding subunit isoform 1 [Homo sapiens]	NP_002936.1		68,139.0	100.0%	2	2	2	0.0262%	3.41%
A5	HUH_A5	Cluster of 67 kda laminin receptor [Homo sapiens] (AAB22299.1)	67 kda laminin receptor [Homo sapiens]	AAB22299.1,AAC50313.1,AAH66941.1,AAH70263.1,AAK69721.1,CAA43469.1,EAW64587.1,NP_001291217.1,NP_002286.2		32,996.3	100.0%	2	2	2	0.0262%	9.49%
A5	HUH_A5	Cluster of Ribosomal protein, large, P0 [Homo sapiens] (AAH01127.1)	Ribosomal protein, large, P0 [Homo sapiens]	AAH01127.1,BAF83798.1,NP_000993.1		34,240.3	100.0%	6	7	11	0.144%	19.2%
A5	HUH_A5	Cluster of 40-kDa keratin protein, partial [Homo sapiens] (AAA36044.1)	Keratin 14 [Homo sapiens]	AAH02690.1,AAH42437.1,NP_000517.3		51,652.7	99.4%	0	0	28	0.367%	24.2%
A5	HUH_A5	Cluster of nucleolin [Homo sapiens] (AAA59954.1)	nucleolin [Homo sapiens]	AAA59954.1,BAC03738.1,NP_005372.2		74,326.1	100.0%	1	1	1	0.0131%	1.13%
A5	HUH_A5	Cluster of protein lin-28 homolog B isoform X1 [Homo sapiens] (XP_006715540.2)	protein lin-28 homolog B isoform X1 [Homo sapiens]	XP_006715540.2,XP_011534120.1		27,957.2	100.0%	5	5	7	0.0918%	20.8%
A5	HUH_A5	Cluster of LASP1 protein [Homo sapiens] (AAH07560.1)	LASP1 protein [Homo sapiens]	AAH07560.1,EAW60543.1		36,014.5	100.0%	4	4	5	0.0656%	12.7%
A5	HUH_A5	Cluster of DNA-binding protein TAXREB107 [Homo sapiens] (AAF99680.1)	DNA-binding protein TAXREB107 [Homo sapiens]	AAF99680.1,AAH20679.1,AAH22444.1,AAH31009.1,BAG34804.1,CAA49188.1,EAW98004.1,EAX01637.1,NP_000961.2,NP_001307071.1		32,729.3	100.0%	3	3	4	0.0525%	8.65%
A5	HUH_A5	Cluster of apurinic endonuclease [Homo sapiens] (AAA58371.1)	apurinic endonuclease [Homo sapiens]	AAA58371.1,AAB26054.1,BAA14381.1,NP_001632.2		35,433.5	100.0%	3	3	4	0.0525%	11.6%
A5	HUH_A5	Cluster of heterogeneous nuclear ribonucleoprotein A1 isoform a [Homo sapiens] (NP_002127.1)	heterogeneous nuclear ribonucleoprotein A1 isoform a [Homo sapiens]	NP_002127.1,NP_112420.1		38,747.0	100.0%	6	7	15	0.197%	24.7%
A5	HUH_A5	Cluster of fructose-bisphosphate aldolase A isoform 2 [Homo sapiens] (NP_001230106.1)	fructose-bisphosphate aldolase A isoform 2 [Homo sapiens]	NP_001230106.1		45,261.2	100.0%	6	6	13	0.170%	15.6%
A5	HUH_A5	Cluster of unnamed protein product [Homo sapiens] (BAG65416.1)	unnamed protein product [Homo sapiens]	BAG65416.1		39,800.5	31.0%	0	0	28	0.367%	31.7%
A5	HUH_A5	Cluster of cytokeratin 9 [Homo sapiens] (CAA82315.1)	cytokeratin 9 [Homo sapiens]	CAA82315.1		62,131.0	100.0%	13	15	37	0.485%	27.6%
A5	HUH_A5	Cluster of EEF1A1 protein [Homo sapiens] (AAH71619.1)	EEF1A1 protein [Homo sapiens]	AAH71619.1		47,869.6	99.8%	0	0	8	0.105%	9.07%
A5	HUH_A5	Cluster of Hlark [Homo sapiens] (AAC51293.1)	Hlark [Homo sapiens]	AAC51293.1,AAH21120.1,BAF85494.1,BAG64902.1,EAW74554.1,EAW74555.1,EAW74556.1,NP_001185772.1,NP_001185773.1,NP_001273064.1,NP_002887.2,NP_113680.1		16,173.4	99.9%	1	1	1	0.0131%	2.19%
A5	HUH_A5	Cluster of unnamed protein product [Homo sapiens] (CAA68390.1)	unnamed protein product [Homo sapiens]	CAA68390.1,WP_108996626.1		0.0	100.0%	3	3	4	0.0525%	30.9%
A5	HUH_A5	Cluster of bromodomain adjacent to zinc finger domain 1A [Homo sapiens] (BAA89209.1)	bromodomain adjacent to zinc finger domain 1A [Homo sapiens]	BAA89209.1		190,850.9	100.0%	2	2	3	0.0393%	0.896%
A5	HUH_A5	Cluster of glyceraldehyde-3-phosphate dehydrogenase [Homo sapiens] (CAA25833.1)	glyceraldehyde-3-phosphate dehydrogenase isoform 2 [Homo sapiens]	NP_001243728.1		31,548.0	100.0%	1	1	42	0.551%	48.5%
A5	HUH_A5	Cluster of Purine-rich element binding protein A [Homo sapiens] (AAH36087.1)	Purine-rich element binding protein A [Homo sapiens]	AAH36087.1,AAI10575.1,AAI10595.1,NP_005850.1		34,911.1	100.0%	1	1	9	0.118%	18.3%
A5	HUH_A5	Cluster of unnamed protein product [Homo sapiens] (BAG65416.1)	beta-actin-like protein 2 [Homo sapiens]	NP_001017992.1		42,004.2	76.8%	0	0	10	0.131%	8.24%
A5	HUH_A5	Cluster of EEF1A1 protein [Homo sapiens] (AAH71619.1)	elongation factor 1 alpha, partial [Homo sapiens]	AAA52344.1		24,195.9	84.1%	0	0	4	0.0525%	8.81%
A5	HUH_A5	Cluster of enolase 1 variant, partial [Homo sapiens] (BAD96912.1)	enolase 1 variant, partial [Homo sapiens]	BAD96912.1		47,198.2	97.7%	0	0	1	0.0131%	2.76%
A5	HUH_A5	Cluster of Heterogeneous nuclear ribonucleoprotein C (C1/C2) [Homo sapiens] (AAH07052.1)	Heterogeneous nuclear ribonucleoprotein C (C1/C2) [Homo sapiens]	AAH07052.1		33,598.4	100.0%	10	11	24	0.315%	27.8%
A5	HUH_A5	Cluster of cytokeratin 8 [Homo sapiens] (AAA35763.1)	cytokeratin 8 [Homo sapiens]	AAA35763.1,AAH73760.1,BAF83627.1,EAW96651.1,EAW96654.1,NP_001243211.1,NP_002264.1		57,809.5	100.0%	6	6	22	0.289%	21.4%
A5	HUH_A5	Cluster of transcriptional activator protein Pur-beta [Homo sapiens] (NP_150093.1)	transcriptional activator protein Pur-beta [Homo sapiens]	NP_150093.1		33,241.9	100.0%	8	10	24	0.315%	33.3%
A5	HUH_A5	Cluster of eukaryotic translation initiation factor 3, subunit 2 beta, 36kDa variant, partial [Homo sapiens] (BAD96203.1)	eukaryotic translation initiation factor 3, subunit 2 beta, 36kDa variant, partial [Homo sapiens]	BAD96203.1,NP_003748.1		36,502.0	100.0%	2	2	2	0.0262%	5.54%
A5	HUH_A5	Cluster of RNH1 protein, partial [Homo sapiens] (AAH11186.1)	RNH1 protein, partial [Homo sapiens]	AAH11186.1,CAA32151.1,EAX02330.1,EAX02335.1,NP_002930.2		49,974.4	100.0%	2	2	2	0.0262%	5.82%
A5	HUH_A5	Cluster of heterogeneous nuclear ribonucleoprotein A1 isoform a [Homo sapiens] (NP_002127.1)	unnamed protein product [Homo sapiens]	BAG65458.1,NP_001317176.1,NP_001317180.1,NP_919223.1		35,411.9	100.0%	1	1	4	0.0525%	6.19%
A5	HUH_A5	Cluster of unnamed protein product [Homo sapiens] (BAH12223.1)	unnamed protein product [Homo sapiens]	BAH12223.1,EAW99960.1,EAW99962.1,NP_001186040.1,NP_001186041.1,NP_001303303.1,NP_005908.1		31,713.1	100.0%	2	2	2	0.0262%	4.83%
A5	HUH_A5	Cluster of Single-stranded DNA binding protein 1 [Homo sapiens] (AAH93054.1)	Single-stranded DNA binding protein 1 [Homo sapiens]	AAH93054.1,NP_003134.1,XP_005250105.1		17,259.7	99.2%	1	1	1	0.0131%	5.41%
A5	HUH_A5	Cluster of cytokeratin 8 [Homo sapiens] (AAA35763.1)	vimentin [Homo sapiens]	NP_003371.2		53,652.7	5.4%	0	0	1	0.0131%	1.50%
A5	HUH_A5	Cluster of Annexin A2 [Homo sapiens] (AAH09564.1)	Annexin A2 [Homo sapiens]	AAH09564.1,AAH23990.1,NP_004030.1		38,606.1	100.0%	17	18	37	0.485%	50.1%
A5	HUH_A5	Cluster of Nucleophosmin (nucleolar phosphoprotein B23, numatrin) [Homo sapiens] (AAH12566.1)	Nucleophosmin (nucleolar phosphoprotein B23, numatrin) [Homo sapiens]	AAH12566.1,AAQ24860.1,AAW67752.1,AAW67753.1,AAW67754.1,AAW67756.1,AAW67757.1,AAW67758.1,BAG70050.1,CAA34809.1,EAW61448.1,NP_002511.1,NP_954654.1		32,603.6	100.0%	2	2	6	0.0787%	18.0%
A5	HUH_A5	Cluster of DNA-binding protein B, partial [Homo sapiens] (AAA35750.1)	DNA-binding protein B, partial [Homo sapiens]	AAA35750.1		39,977.4	90.5%	0	0	2	0.0262%	9.89%
A5	HUH_A5	Cluster of ribosomal protein L3, isoform CRA_f [Homo sapiens] (EAW60315.1)	ribosomal protein L3, isoform CRA_f [Homo sapiens]	EAW60315.1		48,818.8	5.6%	0	0	0	0.000%	0.000%
A5	HUH_A5	Cluster of unnamed protein product [Homo sapiens] (BAG65416.1)	unnamed protein product [Homo sapiens]	BAG62914.1		38,634.2	99.9%	0	0	27	0.354%	38.0%
A5	HUH_A5	Cluster of TALDO1 protein, partial [Homo sapiens] (AAH18847.2)	TALDO1 protein, partial [Homo sapiens]	AAH18847.2,NP_006746.1		37,410.5	100.0%	5	5	8	0.105%	14.9%
A5	HUH_A5	Cluster of heterogeneous nuclear ribonucleoprotein D (AU-rich element RNA binding protein 1, 37kDa), isoform CRA_f [Homo sapiens] (EAX05879.1)	heterogeneous nuclear ribonucleoprotein D (AU-rich element RNA binding protein 1, 37kDa), isoform CRA_f [Homo sapiens]	EAX05879.1		30,255.2	98.7%	1	1	4	0.0525%	6.14%
A5	HUH_A5	Cluster of cytokeratin 8 [Homo sapiens] (AAA35763.1)	type II keratin subunit protein, partial [Homo sapiens]	AAA36153.1		52,789.5	74.0%	0	0	46	0.603%	25.2%
A5	HUH_A5	Cluster of unnamed protein product [Homo sapiens] (BAG35795.1)	unnamed protein product [Homo sapiens]	BAG35795.1,NP_001284487.1,NP_001342058.1,NP_002937.1,XP_021788729.1,XP_024304630.1		30,155.9	100.0%	2	2	3	0.0393%	8.89%
A5	HUH_A5	Cluster of unnamed protein product [Homo sapiens] (BAH12761.1)	unnamed protein product [Homo sapiens]	BAH12761.1,NP_004485.1		26,788.6	100.0%	2	2	2	0.0262%	6.87%
A5	HUH_A5	Cluster of 40-kDa keratin protein, partial [Homo sapiens] (AAA36044.1)	type I keratin 16 [Homo sapiens]	AAB35421.1,NP_005548.2		51,239.0	100.0%	1	1	26	0.341%	22.0%
A5	HUH_A5	Cluster of A0=heterogeneous nuclear ribonucleoprotein [human, placenta, Peptide, 305 aa] (AAB50657.1)	A0=heterogeneous nuclear ribonucleoprotein [human, placenta, Peptide, 305 aa]	AAB50657.1,NP_006796.1		30,840.5	100.0%	3	3	5	0.0656%	11.8%
A5	HUH_A5	Cluster of malate dehydrogenase precursor [Homo sapiens] (AAC03787.1)	malate dehydrogenase precursor [Homo sapiens]	AAC03787.1,AAS07425.1,ABD77290.1,CAG38785.1,NP_005909.2		35,503.7	100.0%	4	4	7	0.0918%	13.9%
A5	HUH_A5	Cluster of tubulin alpha 6 variant, partial [Homo sapiens] (BAD96744.1)	hypothetical protein, partial [Homo sapiens]	CAD97815.1		53,970.3	7.8%	0	0	1	0.0131%	2.92%
A5	HUH_A5	Cluster of CRYZ protein [Homo sapiens] (AAH70058.1)	CRYZ protein [Homo sapiens]	AAH70058.1,BAD92951.1,BAD96870.1,NP_001880.2		35,207.3	100.0%	3	3	4	0.0525%	7.60%
A5	HUH_A5	Cluster of unnamed protein product [Homo sapiens] (BAG65416.1)	unnamed protein product [Homo sapiens]	BAH13327.1,NP_001091.1		42,052.2	99.7%	0	0	20	0.262%	21.0%
A5	HUH_A5	Cluster of cytokeratin 8 [Homo sapiens] (AAA35763.1)	epidermal cytokeratin 2 [Homo sapiens]	AAC83410.1,NP_000414.2		65,433.9	100.0%	6	6	27	0.354%	20.9%

## Sheet:  SNU-449 cell line pulldown
Biological sample name	MS/MS sample name	Cluster	Protein name	Protein accession numbers	Alternate IDs	Protein molecular weight (Da)	Protein identification probability	Exclusive unique peptide count	Exclusive unique spectrum count	Total spectrum count	Percentage of total spectra	Percentage sequence coverage
SNUA1	SNU_A1	Cluster of keratin 1 [Homo sapiens] (AAG41947.1)	Keratin 5 [Homo sapiens]	AAH24292.1,EAW96635.1,NP_000415.2		62,379.6	99.8%	1	1	6	0.0695%	6.61%
SNUA1	SNU_A1	Cluster of hnRNP G protein [Homo sapiens] (CAA80599.1)	hnRNP G protein [Homo sapiens]	CAA80599.1,NP_002130.2		42,333.7	100.0%	6	7	67	0.776%	35.3%
SNUA1	SNU_A1	Cluster of PURA protein, partial [Homo sapiens] (AAI10575.1)	PURA protein, partial [Homo sapiens]	AAI10575.1,AAI10595.1,NP_005850.1		34,911.1	100.0%	1	1	51	0.590%	40.0%
SNUA1	SNU_A1	Cluster of YBX1 protein, partial [Homo sapiens] (AAH00064.1)	DNA-binding protein A, partial [Homo sapiens]	AAA35749.1		44,611.1	43.6%	0	0	11	0.127%	9.71%
SNUA1	SNU_A1	Cluster of heterogeneous nuclear ribonucleoprotein AB isoform a variant, partial [Homo sapiens] (BAD97145.1)	heterogeneous nuclear ribonucleoprotein AB isoform a variant, partial [Homo sapiens]	BAD97145.1,BAG60045.1,NP_004490.2,NP_112556.2		35,996.0	100.0%	3	3	9	0.104%	13.6%
SNUA1	SNU_A1	Cluster of probable rRNA-processing protein EBP2 isoform 1 [Homo sapiens] (NP_001153408.1)	probable rRNA-processing protein EBP2 isoform 1 [Homo sapiens]	NP_001153408.1		40,685.4	100.0%	2	2	2	0.0232%	6.09%
SNUA1	SNU_A1	Cluster of Keratin 10 [Homo sapiens] (AAH34697.1)	Keratin 18 [Homo sapiens]	AAH00698.1,BAD96813.1,BAG36700.1,CAA31377.1,NP_000215.1		47,335.1	70.5%	0	0	4	0.0463%	1.63%
SNUA1	SNU_A1	Cluster of hnRNP C2 protein [Homo sapiens] (AAA36576.1)	hnRNP C2 protein [Homo sapiens]	AAA36576.1,AAA52680.1,AAH07052.1,AAH08364.1,AAH08423.1,BAD92764.1,BAF85308.1,BAG35259.1,BAG35300.1,NP_004491.2,NP_112604.2		32,338.0	100.0%	5	6	45	0.521%	31.0%
SNUA1	SNU_A1	Cluster of poly(rC)-binding protein 2 isoform b [Homo sapiens] (NP_114366.1)	hnRNP-E1 [Homo sapiens]	CAA55016.1		37,526.2	25.8%	0	0	1	0.0116%	3.09%
SNUA1	SNU_A1	Cluster of heterogeneous nuclear ribonucleoprotein A3 isoform c [Homo sapiens] (NP_001317180.1)	heterogeneous nuclear ribonucleoprotein A3 isoform c [Homo sapiens]	NP_001317180.1,NP_919223.1		35,411.9	100.0%	2	2	2	0.0232%	5.74%
SNUA1	SNU_A1	Cluster of RNA-binding motif, single-stranded-interacting protein 2 isoform X3 [Homo sapiens] (XP_005269116.1)	RNA-binding motif, single-stranded-interacting protein 2 isoform X3 [Homo sapiens]	XP_005269116.1,XP_005269117.1		45,637.9	100.0%	6	6	18	0.208%	21.7%
SNUA1	SNU_A1	Cluster of unnamed protein product [Homo sapiens] (BAG51785.1)	unnamed protein product [Homo sapiens]	BAG51785.1,BAG52918.1		46,241.5	99.8%	1	1	6	0.0695%	11.3%
SNUA1	SNU_A1	Cluster of Keratin 10 [Homo sapiens] (AAH34697.1)	Keratin 10 [Homo sapiens]	AAH34697.1,EAW60681.1,NP_000412.3,P13645.6,XP_005257400.1		58,828.8	100.0%	13	13	46	0.533%	26.2%
SNUA1	SNU_A1	Cluster of Keratin 10 [Homo sapiens] (AAH34697.1)	type I keratin 16 [Homo sapiens]	AAB35421.1,NP_005548.2		51,239.0	63.8%	0	0	15	0.174%	6.77%
SNUA1	SNU_A1	Cluster of Keratin 10 [Homo sapiens] (AAH34697.1)	keratin, type I cytoskeletal 9 [Homo sapiens]	NP_000217.2		62,065.9	100.0%	2	2	6	0.0695%	5.14%
SNUA1	SNU_A1	Cluster of CSNK2A1 protein [Homo sapiens] (AAH50036.1)	CSNK2A1 protein [Homo sapiens]	AAH50036.1,NP_001886.1		45,909.6	100.0%	8	8	14	0.162%	22.2%
SNUA1	SNU_A1	Cluster of epididymis secretory sperm binding protein, partial [Homo sapiens] (ADO22487.1)	epididymis secretory sperm binding protein, partial [Homo sapiens]	ADO22487.1		49,468.3	100.0%	2	2	12	0.139%	21.0%
SNUA1	SNU_A1	Cluster of dermcidin isoform 2 preproprotein [Homo sapiens] (NP_001287783.1)	dermcidin isoform 2 preproprotein [Homo sapiens]	NP_001287783.1,NP_444513.1		11,284.1	85.3%	1	1	1	0.0116%	9.09%
SNUA1	SNU_A1	Cluster of Eukaryotic translation elongation factor 1 alpha 1 [Homo sapiens] (AAH71727.1)	Eukaryotic translation elongation factor 1 alpha 1 [Homo sapiens]	AAH71727.1,AAH71841.1,BAD96243.1,BAD96271.1,BAD96702.1,BAD96750.1,BAD96766.1,CAA34756.1,Q5VTE0.1		50,199.2	100.0%	3	3	9	0.104%	10.4%
SNUA1	SNU_A1	Cluster of hnRNP G protein [Homo sapiens] (CAA80599.1)	RBM1, partial [Homo sapiens]	ABB92435.1,NP_062556.2		42,143.4	100.0%	2	2	49	0.567%	28.1%
SNUA1	SNU_A1	Cluster of Keratin 10 [Homo sapiens] (AAH34697.1)	Keratin 14 [Homo sapiens]	AAH02690.1,AAH42437.1,NP_000517.3		51,562.5	69.8%	0	0	15	0.174%	6.78%
SNUA1	SNU_A1	Cluster of replication protein A 70 kDa DNA-binding subunit isoform 1 [Homo sapiens] (NP_002936.1)	replication protein A 70 kDa DNA-binding subunit isoform 1 [Homo sapiens]	NP_002936.1		68,139.0	74.9%	0	0	3	0.0347%	5.19%
SNUA1	SNU_A1	Cluster of YBX1 protein, partial [Homo sapiens] (AAH00064.1)	Y box binding protein-1 [Homo sapiens]	AAA61308.1		35,411.4	100.0%	1	1	39	0.451%	40.7%
SNUA1	SNU_A1	Cluster of replication protein A 70 kDa DNA-binding subunit isoform 1 [Homo sapiens] (NP_002936.1)	replication protein A1, 70kDa variant, partial [Homo sapiens]	BAD92969.1		69,430.7	74.8%	0	0	3	0.0347%	5.08%
SNUA1	SNU_A1	Cluster of heterogeneous nuclear ribonucleoprotein D0B, partial [Homo sapiens] (AAB96683.1)	heterogeneous nuclear ribonucleoprotein D0B, partial [Homo sapiens]	AAB96683.1,EAX05872.1,EAX05879.1,NP_002129.2,NP_112738.1		30,255.2	100.0%	2	2	7	0.0810%	12.1%
SNUA1	SNU_A1	Cluster of RNA-binding protein 4B isoform 1 [Homo sapiens] (NP_113680.1)	RNA-binding protein 4B isoform 1 [Homo sapiens]	NP_113680.1		40,149.7	100.0%	2	2	2	0.0232%	4.74%
SNUA1	SNU_A1	Cluster of HNRPU protein [Homo sapiens] (AAH15782.1)	HNRPU protein [Homo sapiens]	AAH15782.1,BAG54384.1,NP_114032.2		83,085.8	100.0%	2	2	2	0.0232%	4.57%
SNUA1	SNU_A1	Cluster of ataxin-10 isoform 1 [Homo sapiens] (NP_037368.1)	ataxin-10 isoform 1 [Homo sapiens]	NP_037368.1		53,490.8	98.3%	1	1	1	0.0116%	1.68%
SNUA1	SNU_A1	Cluster of YBX1 protein, partial [Homo sapiens] (AAH00064.1)	YBX1 protein, partial [Homo sapiens]	AAH00064.1		29,374.2	100.0%	1	1	44	0.509%	47.0%
SNUA1	SNU_A1	Cluster of transcriptional activator protein Pur-beta [Homo sapiens] (NP_150093.1)	transcriptional activator protein Pur-beta [Homo sapiens]	NP_150093.1		33,241.9	100.0%	3	3	3	0.0347%	9.29%
SNUA1	SNU_A1	Cluster of PURA protein, partial [Homo sapiens] (AAI10575.1)	purine-rich element binding protein A [Homo sapiens]	AAV38195.1		34,911.2	99.4%	0	0	45	0.521%	32.3%
SNUA1	SNU_A1	Cluster of Chromosome 3 open reading frame 37 [Homo sapiens] (AAH09993.1)	Chromosome 3 open reading frame 37 [Homo sapiens]	AAH09993.1,EAW79265.1,NP_064572.2		40,561.2	100.0%	4	4	4	0.0463%	14.7%
SNUA1	SNU_A1	Cluster of elongation factor Tu [Homo sapiens] (AAB00499.1)	elongation factor Tu [Homo sapiens]	AAB00499.1,AAC60647.1,NP_003312.3,P49411.2		49,875.8	87.7%	0	0	0	0.000%	0.000%
SNUA1	SNU_A1	Cluster of RNA-binding motif, single-stranded-interacting protein 1 isoform X3 [Homo sapiens] (XP_005246796.1)	RNA-binding motif, single-stranded-interacting protein 1 isoform X3 [Homo sapiens]	XP_005246796.1,XP_005246798.1		45,503.7	100.0%	4	4	17	0.197%	16.7%
SNUA1	SNU_A1	Cluster of CGI-44 protein [Homo sapiens] (AAD34039.1)	CGI-44 protein [Homo sapiens]	AAD34039.1,AAF22029.1,BAD96183.1,BAG35933.1,EAW77320.1,NP_067022.1		49,962.0	100.0%	6	6	9	0.104%	14.9%
SNUA1	SNU_A1	Cluster of heterogeneous nuclear ribonucleoprotein M isoform a [Homo sapiens] (NP_005959.2)	heterogeneous nuclear ribonucleoprotein M isoform X2 [Homo sapiens]	XP_005272536.1		75,637.9	68.9%	0	0	7	0.0810%	11.5%
SNUA1	SNU_A1	Cluster of Ribonuclease/angiogenin inhibitor 1 [Homo sapiens] (AAH00677.1)	Ribonuclease/angiogenin inhibitor 1 [Homo sapiens]	AAH00677.1,CAA32151.1,EAX02330.1,EAX02335.1,NP_002930.2		49,974.4	100.0%	2	2	6	0.0695%	5.64%
SNUA1	SNU_A1	Cluster of keratin 1 [Homo sapiens] (AAG41947.1)	keratin 1 [Homo sapiens]	AAG41947.1,AFA52002.1,AFA52004.1,AFA52005.1,AFA52007.1,NP_006112.3		66,040.3	100.0%	3	3	30	0.347%	23.3%
SNUA1	SNU_A1	Cluster of ribosomal protein L3, isoform CRA_f [Homo sapiens] (EAW60315.1)	ribosomal protein L3, isoform CRA_f [Homo sapiens]	EAW60315.1		48,818.8	100.0%	4	4	7	0.0810%	9.77%
SNUA1	SNU_A1	Cluster of unnamed protein product [Homo sapiens] (BAG62914.1)	unnamed protein product [Homo sapiens]	BAG62914.1		38,634.2	100.0%	1	1	52	0.602%	45.2%
SNUA1	SNU_A1	Cluster of heterogeneous nuclear ribonucleoprotein K isoform a [Homo sapiens] (NP_112553.1)	heterogeneous nuclear ribonucleoprotein K isoform a [Homo sapiens]	NP_112553.1		51,030.4	100.0%	10	10	29	0.336%	26.9%
SNUA1	SNU_A1	Cluster of splicing factor U2AF 65 kDa subunit isoform b [Homo sapiens] (NP_001012496.1)	splicing factor U2AF 65 kDa subunit isoform b [Homo sapiens]	NP_001012496.1,NP_009210.1		53,501.2	100.0%	1	1	1	0.0116%	1.70%
SNUA1	SNU_A1	Cluster of keratin 1 [Homo sapiens] (AAG41947.1)	type II keratin subunit protein, partial [Homo sapiens]	AAA36153.1		52,789.5	99.8%	1	1	23	0.266%	25.2%
SNUA1	SNU_A1	Cluster of alloalbumin Venezia [Homo sapiens] (AAA98798.1)	alloalbumin Venezia [Homo sapiens]	AAA98798.1,AAF01333.1,AAG35503.1,AAN17825.1,AEE60908.1,BAF85444.1,CAA23754.1,EAX05666.1,NP_000468.1		68,613.1	100.0%	6	6	13	0.150%	8.28%
SNUA1	SNU_A1	Cluster of unnamed protein product [Homo sapiens] (BAG60373.1)	unnamed protein product [Homo sapiens]	BAG60373.1		21,031.0	99.8%	1	1	1	0.0116%	6.22%
SNUA1	SNU_A1	Cluster of keratin 1 [Homo sapiens] (AAG41947.1)	vimentin [Homo sapiens]	AAA61279.1,ACA06103.1,BAD96202.1,CAG28618.1,NP_003371.2		53,684.8	59.1%	0	0	0	0.000%	0.000%
SNUA1	SNU_A1	Cluster of RNA-binding protein 45 isoform 2 [Homo sapiens] (NP_001352508.1)	RNA-binding protein 45 isoform 2 [Homo sapiens]	NP_001352508.1,NP_694453.2		53,503.2	99.9%	2	2	2	0.0232%	5.25%
SNUA1	SNU_A1	Cluster of heterogeneous nuclear ribonucleoprotein M isoform a [Homo sapiens] (NP_005959.2)	heterogeneous nuclear ribonucleoprotein M isoform a [Homo sapiens]	NP_005959.2,NP_112480.2		77,517.3	100.0%	1	1	9	0.104%	13.3%
SNUA1	SNU_A1	Cluster of unnamed protein product [Homo sapiens] (BAG51785.1)	tubulin alpha-1C chain isoform a [Homo sapiens]	NP_001290043.1		57,730.6	90.0%	0	0	5	0.0579%	6.55%
SNUA1	SNU_A1	Cluster of unnamed protein product [Homo sapiens] (BAG62914.1)	alpha-actin [Homo sapiens]	AAA51577.1,BAF83305.1,BAH13327.1,NP_001091.1,NP_001604.1		42,052.2	100.0%	2	2	39	0.451%	25.7%
SNUA1	SNU_A1	Cluster of keratin 1 [Homo sapiens] (AAG41947.1)	epidermal cytokeratin 2 [Homo sapiens]	AAC83410.1		65,866.4	100.0%	10	10	31	0.359%	25.6%
SNUS1	SNU_S1	Cluster of keratin 1 [Homo sapiens] (AAG41947.1)	epidermal cytokeratin 2 [Homo sapiens]	AAC83410.1		65,866.4	100.0%	14	14	51	0.583%	40.2%
SNUS1	SNU_S1	Cluster of heterogeneous nuclear ribonucleoprotein M isoform a [Homo sapiens] (NP_005959.2)	heterogeneous nuclear ribonucleoprotein M isoform a [Homo sapiens]	NP_005959.2,NP_112480.2		77,517.3	100.0%	2	2	17	0.194%	16.8%
SNUS1	SNU_S1	Cluster of PURA protein, partial [Homo sapiens] (AAI10575.1)	purine-rich element binding protein A [Homo sapiens]	AAV38195.1		34,911.2	99.9%	0	0	48	0.549%	36.6%
SNUS1	SNU_S1	Cluster of 28S ribosomal protein S5, mitochondrial isoform b [Homo sapiens] (NP_001308924.1)	28S ribosomal protein S5, mitochondrial isoform b [Homo sapiens]	NP_001308924.1,NP_114108.1		48,007.6	100.0%	3	3	3	0.0343%	9.97%
SNUS1	SNU_S1	Cluster of heterogeneous nuclear ribonucleoprotein A3 isoform c [Homo sapiens] (NP_001317180.1)	heterogeneous nuclear ribonucleoprotein A3 isoform c [Homo sapiens]	NP_001317180.1,NP_919223.1		35,411.9	100.0%	3	3	4	0.0457%	9.06%
SNUS1	SNU_S1	Cluster of poly(rC)-binding protein 2 isoform b [Homo sapiens] (NP_114366.1)	unnamed protein product [Homo sapiens]	BAG59482.1		32,165.8	100.0%	1	1	44	0.503%	56.1%
SNUS1	SNU_S1	Cluster of desmoplakin I [Homo sapiens] (AAA85135.1)	desmoplakin I [Homo sapiens]	AAA85135.1,NP_001305963.1,NP_004406.2		331,781.4	100.0%	3	3	3	0.0343%	1.08%
SNUS1	SNU_S1	Cluster of unnamed protein product [Homo sapiens] (BAG62914.1)	unnamed protein product [Homo sapiens]	BAG62914.1		38,634.2	100.0%	1	1	31	0.354%	38.0%
SNUS1	SNU_S1	Cluster of unnamed protein product [Homo sapiens] (BAG62914.1)	alpha-actin [Homo sapiens]	AAA51577.1,BAF83305.1,BAH13327.1,NP_001091.1,NP_001604.1		38,580.3	100.0%	1	1	20	0.229%	19.1%
SNUS1	SNU_S1	Cluster of heterogeneous nuclear ribonucleoprotein AB isoform a variant, partial [Homo sapiens] (BAD97145.1)	heterogeneous nuclear ribonucleoprotein AB isoform a variant, partial [Homo sapiens]	BAD97145.1,BAG60045.1,NP_004490.2,NP_112556.2		35,996.0	100.0%	4	4	11	0.126%	16.0%
SNUS1	SNU_S1	Cluster of Eukaryotic translation elongation factor 1 alpha 1 [Homo sapiens] (AAH71727.1)	Eukaryotic translation elongation factor 1 alpha 1 [Homo sapiens]	AAH71727.1,AAH71841.1,BAD96243.1,BAD96271.1,BAD96702.1,BAD96750.1,BAD96766.1,CAA34756.1,Q5VTE0.1		50,199.2	100.0%	1	1	3	0.0343%	4.11%
SNUS1	SNU_S1	Cluster of Keratin 10 [Homo sapiens] (AAH34697.1)	Keratin 10 [Homo sapiens]	AAH34697.1,EAW60681.1,NP_000412.3,P13645.6,XP_005257400.1		58,828.8	100.0%	16	17	70	0.800%	32.2%
SNUS1	SNU_S1	Cluster of CGI-44 protein [Homo sapiens] (AAD34039.1)	CGI-44 protein [Homo sapiens]	AAD34039.1,AAF22029.1,BAD96183.1,BAG35933.1,EAW77320.1,NP_067022.1		49,962.0	98.6%	1	1	1	0.0114%	3.11%
SNUS1	SNU_S1	Cluster of keratin 1 [Homo sapiens] (AAG41947.1)	unnamed protein product [Homo sapiens]	BAG61442.1		58,679.9	100.0%	1	1	23	0.263%	22.1%
SNUS1	SNU_S1	Cluster of alloalbumin Venezia [Homo sapiens] (AAA98798.1)	alloalbumin Venezia [Homo sapiens]	AAA98798.1,AAF01333.1,AAG35503.1,AAN17825.1,AEE60908.1,BAF85444.1,CAA23754.1,EAX05666.1,NP_000468.1		68,613.1	100.0%	4	4	9	0.103%	6.29%
SNUS1	SNU_S1	Cluster of transcriptional activator protein Pur-beta [Homo sapiens] (NP_150093.1)	transcriptional activator protein Pur-beta [Homo sapiens]	NP_150093.1		33,241.9	100.0%	4	4	5	0.0572%	13.8%
SNUS1	SNU_S1	Cluster of ribosomal protein L3, isoform CRA_f [Homo sapiens] (EAW60315.1)	ribosomal protein L3, isoform CRA_f [Homo sapiens]	EAW60315.1		48,818.8	100.0%	2	2	3	0.0343%	4.88%
SNUS1	SNU_S1	Cluster of RNA-binding protein 4B isoform 1 [Homo sapiens] (NP_113680.1)	RNA-binding protein 4B isoform 1 [Homo sapiens]	NP_113680.1		40,149.7	100.0%	11	11	25	0.286%	30.1%
SNUS1	SNU_S1	Cluster of ataxin-10 isoform 1 [Homo sapiens] (NP_037368.1)	ataxin-10 isoform 1 [Homo sapiens]	NP_037368.1		53,490.8	100.0%	3	3	3	0.0343%	5.47%
SNUS1	SNU_S1	Cluster of Keratin 10 [Homo sapiens] (AAH34697.1)	Keratin 18 [Homo sapiens]	AAH00698.1,BAD96813.1,BAG36700.1,CAA31377.1,NP_000215.1		47,335.1	99.1%	1	1	5	0.0572%	4.65%
SNUS1	SNU_S1	Cluster of aging-associated gene 9 protein [Homo sapiens] (AAV33305.1)	aging-associated gene 9 protein [Homo sapiens]	AAV33305.1,ABD77190.1,CAA25833.1,EAW88786.1,NP_001243728.1,NP_001344872.1,NP_002037.2		36,054.4	100.0%	2	2	2	0.0229%	8.36%
SNUS1	SNU_S1	Cluster of PURA protein, partial [Homo sapiens] (AAI10575.1)	PURA protein, partial [Homo sapiens]	AAI10575.1,AAI10595.1,NP_005850.1		34,911.1	100.0%	1	1	54	0.617%	44.9%
SNUS1	SNU_S1	Cluster of probable rRNA-processing protein EBP2 isoform 1 [Homo sapiens] (NP_001153408.1)	probable rRNA-processing protein EBP2 isoform 1 [Homo sapiens]	NP_001153408.1		40,685.4	100.0%	3	3	4	0.0457%	8.31%
SNUS1	SNU_S1	Cluster of hnRNP G protein [Homo sapiens] (CAA80599.1)	hnRNP G protein [Homo sapiens]	CAA80599.1,NP_002130.2		42,333.7	100.0%	4	5	32	0.366%	27.4%
SNUS1	SNU_S1	Cluster of YBX1 protein, partial [Homo sapiens] (AAH00064.1)	YBX1 protein, partial [Homo sapiens]	AAH00064.1		29,374.2	100.0%	1	1	73	0.834%	47.4%
SNUS1	SNU_S1	Cluster of casein kinase II beta subunit [Homo sapiens] (AAA52123.1)	casein kinase II beta subunit [Homo sapiens]	AAA52123.1,CCI79694.1,CCI79697.1,EAX03472.1,NP_001269314.1,NP_034105.1,XP_004043713.1		0.0	96.2%	1	1	2	0.0229%	5.12%
SNUS1	SNU_S1	Cluster of YBX1 protein, partial [Homo sapiens] (AAH00064.1)	Y box binding protein-1 [Homo sapiens]	AAA61308.1		35,411.4	100.0%	1	1	65	0.743%	41.0%
SNUS1	SNU_S1	Cluster of dermcidin isoform 2 preproprotein [Homo sapiens] (NP_001287783.1)	dermcidin isoform 2 preproprotein [Homo sapiens]	NP_001287783.1,NP_444513.1		11,284.1	100.0%	2	2	6	0.0686%	18.2%
SNUS1	SNU_S1	Cluster of keratin 1 [Homo sapiens] (AAG41947.1)	Keratin 5 [Homo sapiens]	AAH24292.1,EAW96635.1,NP_000415.2		62,379.6	100.0%	10	10	37	0.423%	28.5%
SNUS1	SNU_S1	Cluster of poly(rC)-binding protein 2 isoform b [Homo sapiens] (NP_114366.1)	hnRNP-E1 [Homo sapiens]	CAA55016.1		37,526.2	100.0%	4	4	36	0.412%	28.7%
SNUS1	SNU_S1	Cluster of heterogeneous nuclear ribonucleoprotein D0B, partial [Homo sapiens] (AAB96683.1)	heterogeneous nuclear ribonucleoprotein D0B, partial [Homo sapiens]	AAB96683.1,EAX05872.1,EAX05879.1,NP_002129.2,NP_112738.1		30,255.2	100.0%	3	3	9	0.103%	13.1%
SNUS1	SNU_S1	Cluster of Chromosome 3 open reading frame 37 [Homo sapiens] (AAH09993.1)	Chromosome 3 open reading frame 37 [Homo sapiens]	AAH09993.1,EAW79265.1,NP_064572.2		40,575.2	100.0%	10	10	18	0.206%	33.6%
SNUS1	SNU_S1	Cluster of hnRNP G protein [Homo sapiens] (CAA80599.1)	RBM1, partial [Homo sapiens]	ABB92435.1,NP_062556.2		42,143.4	100.0%	2	2	30	0.343%	22.4%
SNUS1	SNU_S1	Cluster of Keratin 10 [Homo sapiens] (AAH34697.1)	type I keratin 16 [Homo sapiens]	AAB35421.1,NP_005548.2		51,239.0	100.0%	1	1	29	0.332%	14.6%
SNUS1	SNU_S1	Cluster of epididymis secretory sperm binding protein, partial [Homo sapiens] (ADO22487.1)	epididymis secretory sperm binding protein, partial [Homo sapiens]	ADO22487.1		49,468.3	99.5%	0	0	4	0.0457%	10.2%
SNUS1	SNU_S1	Cluster of casein kinase II subunit alpha' [Homo sapiens] (NP_001887.1)	casein kinase II subunit alpha' [Homo sapiens]	NP_001887.1		41,214.5	100.0%	2	2	7	0.0800%	19.1%
SNUS1	SNU_S1	Cluster of YBX1 protein, partial [Homo sapiens] (AAH00064.1)	DNA-binding protein A, partial [Homo sapiens]	AAA35749.1		44,611.1	95.7%	0	0	18	0.206%	14.3%
SNUS1	SNU_S1	Cluster of unnamed protein product [Homo sapiens] (BAC05256.1)	unnamed protein product [Homo sapiens]	BAC05256.1,BAD92445.1,BAG38000.1,CAH18071.1,EAW78207.1,NP_001230808.1,NP_004584.1		21,936.0	100.0%	2	2	2	0.0229%	8.33%
SNUS1	SNU_S1	Cluster of heterogeneous nuclear ribonucleoprotein M isoform a [Homo sapiens] (NP_005959.2)	heterogeneous nuclear ribonucleoprotein M isoform X2 [Homo sapiens]	XP_005272536.1		75,637.9	94.5%	0	0	13	0.149%	13.8%
SNUS1	SNU_S1	Cluster of unnamed protein product [Homo sapiens] (BAG51785.1)	unnamed protein product [Homo sapiens]	BAG51785.1,BAG52918.1		46,241.5	74.6%	0	0	3	0.0343%	6.01%
SNUS1	SNU_S1	Cluster of Keratin 10 [Homo sapiens] (AAH34697.1)	Keratin 14 [Homo sapiens]	AAH02690.1,AAH42437.1,NP_000517.3		51,652.7	100.0%	2	2	34	0.389%	19.5%
SNUS1	SNU_S1	Cluster of heterogeneous nuclear ribonucleoprotein K isoform a [Homo sapiens] (NP_112553.1)	heterogeneous nuclear ribonucleoprotein K isoform a [Homo sapiens]	NP_112553.1		51,030.4	100.0%	12	15	38	0.434%	30.6%
SNUS1	SNU_S1	Cluster of Ribonuclease/angiogenin inhibitor 1 [Homo sapiens] (AAH00677.1)	Ribonuclease/angiogenin inhibitor 1 [Homo sapiens]	AAH00677.1,CAA32151.1,EAX02330.1,EAX02335.1,NP_002930.2		49,955.3	100.0%	2	2	7	0.0800%	5.64%
SNUS1	SNU_S1	Cluster of YBX1 protein, partial [Homo sapiens] (AAH00064.1)	Y-box-binding protein 3 isoform b [Homo sapiens]	NP_001138898.1		31,946.6	33.5%	0	0	18	0.206%	19.5%
SNUS1	SNU_S1	Cluster of unnamed protein product [Homo sapiens] (BAG51785.1)	tubulin alpha-1C chain isoform a [Homo sapiens]	NP_001290043.1		57,730.6	75.1%	0	0	3	0.0343%	4.82%
SNUS1	SNU_S1	Cluster of unnamed protein product [Homo sapiens] (BAB14850.1)	unnamed protein product [Homo sapiens]	BAB14850.1,EAW82270.1,NP_112157.2		40,573.9	100.0%	2	2	2	0.0229%	9.89%
SNUS1	SNU_S1	Cluster of Mitochondrial ribosomal protein L38 [Homo sapiens] (AAH13311.1)	Mitochondrial ribosomal protein L38 [Homo sapiens]	AAH13311.1,NP_115867.2		44,597.4	100.0%	4	4	7	0.0800%	10.1%
SNUS1	SNU_S1	Cluster of CSNK2A1 protein [Homo sapiens] (AAH50036.1)	CSNK2A1 protein [Homo sapiens]	AAH50036.1,NP_001886.1		45,909.6	100.0%	21	33	185	2.11%	49.6%
SNUS1	SNU_S1	Cluster of keratin 1 [Homo sapiens] (AAG41947.1)	keratin 1 [Homo sapiens]	AAG41947.1,AFA52002.1,AFA52004.1,AFA52005.1,AFA52007.1,NP_006112.3		66,040.3	100.0%	14	14	165	1.89%	50.2%
SNUS1	SNU_S1	Cluster of keratin 1 [Homo sapiens] (AAG41947.1)	type II keratin subunit protein, partial [Homo sapiens]	AAA36153.1		52,789.5	100.0%	1	1	118	1.35%	29.4%
SNUS1	SNU_S1	Cluster of RNA-binding motif, single-stranded-interacting protein 1 isoform X3 [Homo sapiens] (XP_005246796.1)	RNA-binding motif, single-stranded-interacting protein 1 isoform X3 [Homo sapiens]	XP_005246796.1,XP_005246798.1		45,503.7	99.7%	1	1	2	0.0229%	3.57%
SNUS1	SNU_S1	Cluster of hnRNP C2 protein [Homo sapiens] (AAA36576.1)	hnRNP C2 protein [Homo sapiens]	AAA36576.1,AAA52680.1,AAH07052.1,AAH08364.1,AAH08423.1,BAD92764.1,BAF85308.1,BAG35259.1,BAG35300.1,NP_004491.2,NP_112604.2		32,338.0	100.0%	2	2	6	0.0686%	13.5%
SNUS1	SNU_S1	Cluster of Keratin 10 [Homo sapiens] (AAH34697.1)	keratin, type I cytoskeletal 9 [Homo sapiens]	NP_000217.2		62,065.9	100.0%	32	39	141	1.61%	57.8%
SNUS2	SNU_S2	Cluster of heterogeneous nuclear ribonucleoprotein M isoform a [Homo sapiens] (NP_005959.2)	heterogeneous nuclear ribonucleoprotein M isoform a [Homo sapiens]	NP_005959.2,NP_112480.2		77,517.3	99.9%	0	0	6	0.0731%	3.84%
SNUS2	SNU_S2	Cluster of PURA protein, partial [Homo sapiens] (AAI10575.1)	purine-rich element binding protein A [Homo sapiens]	AAV38195.1		34,911.2	100.0%	1	1	14	0.171%	11.8%
SNUS2	SNU_S2	Cluster of 28S ribosomal protein S5, mitochondrial isoform b [Homo sapiens] (NP_001308924.1)	28S ribosomal protein S5, mitochondrial isoform b [Homo sapiens]	NP_001308924.1,NP_114108.1		48,007.6	100.0%	3	3	5	0.0609%	9.97%
SNUS2	SNU_S2	Cluster of heterogeneous nuclear ribonucleoprotein A3 isoform c [Homo sapiens] (NP_001317180.1)	heterogeneous nuclear ribonucleoprotein A3 isoform c [Homo sapiens]	NP_001317180.1,NP_919223.1		35,411.9	100.0%	3	4	7	0.0853%	9.06%
SNUS2	SNU_S2	Cluster of poly(rC)-binding protein 2 isoform b [Homo sapiens] (NP_114366.1)	unnamed protein product [Homo sapiens]	BAG59482.1		32,165.8	100.0%	0	0	37	0.451%	46.5%
SNUS2	SNU_S2	Cluster of Ribonuclease/angiogenin inhibitor 1 [Homo sapiens] (AAH00677.1)	Ribonuclease/angiogenin inhibitor 1 [Homo sapiens]	AAH00677.1,CAA32151.1,EAX02330.1,EAX02335.1,NP_002930.2		49,974.4	99.8%	1	1	2	0.0244%	3.04%
SNUS2	SNU_S2	Cluster of unnamed protein product [Homo sapiens] (BAG62914.1)	unnamed protein product [Homo sapiens]	BAG62914.1		38,634.2	97.2%	0	0	9	0.110%	16.7%
SNUS2	SNU_S2	Cluster of Eukaryotic translation elongation factor 1 alpha 1 [Homo sapiens] (AAH71727.1)	Eukaryotic translation elongation factor 1 alpha 1 [Homo sapiens]	AAH71727.1,AAH71841.1,BAD96243.1,BAD96271.1,BAD96702.1,BAD96750.1,BAD96766.1,CAA34756.1,Q5VTE0.1		50,199.2	85.3%	0	0	1	0.0122%	2.38%
SNUS2	SNU_S2	Cluster of YBX1 protein, partial [Homo sapiens] (AAH00064.1)	DNA-binding protein A, partial [Homo sapiens]	AAA35749.1		44,611.1	95.8%	0	0	9	0.110%	14.3%
SNUS2	SNU_S2	Cluster of heterogeneous nuclear ribonucleoprotein AB isoform a variant, partial [Homo sapiens] (BAD97145.1)	heterogeneous nuclear ribonucleoprotein AB isoform a variant, partial [Homo sapiens]	BAD97145.1,BAG60045.1,NP_004490.2,NP_112556.2		35,008.9	62.0%	0	0	2	0.0244%	3.01%
SNUS2	SNU_S2	Cluster of nucleolin [Homo sapiens] (AAA59954.1)	nucleolin [Homo sapiens]	AAA59954.1,BAC03738.1,NP_005372.2		74,326.1	99.9%	1	1	2	0.0244%	1.13%
SNUS2	SNU_S2	Cluster of alloalbumin Venezia [Homo sapiens] (AAA98798.1)	alloalbumin Venezia [Homo sapiens]	AAA98798.1,AAF01333.1,AAG35503.1,AAN17825.1,AEE60908.1,BAF85444.1,CAA23754.1,EAX05666.1,NP_000468.1		68,613.1	100.0%	4	4	8	0.0975%	5.79%
SNUS2	SNU_S2	Cluster of transcriptional activator protein Pur-beta [Homo sapiens] (NP_150093.1)	transcriptional activator protein Pur-beta [Homo sapiens]	NP_150093.1		33,241.9	100.0%	10	11	50	0.609%	38.1%
SNUS2	SNU_S2	Cluster of RNA-binding protein 4B isoform 1 [Homo sapiens] (NP_113680.1)	RNA-binding protein 4B isoform 1 [Homo sapiens]	NP_113680.1		40,149.7	100.0%	8	8	13	0.158%	18.7%
SNUS2	SNU_S2	Cluster of aging-associated gene 9 protein [Homo sapiens] (AAV33305.1)	aging-associated gene 9 protein [Homo sapiens]	AAV33305.1,ABD77190.1,CAA25833.1,EAW88786.1,NP_001243728.1,NP_001344872.1,NP_002037.2		36,054.4	100.0%	2	2	3	0.0366%	8.66%
SNUS2	SNU_S2	Cluster of PURA protein, partial [Homo sapiens] (AAI10575.1)	PURA protein, partial [Homo sapiens]	AAI10575.1,AAI10595.1,NP_005850.1		34,911.1	100.0%	1	1	17	0.207%	12.6%
SNUS2	SNU_S2	Cluster of hnRNP G protein [Homo sapiens] (CAA80599.1)	hnRNP G protein [Homo sapiens]	CAA80599.1,NP_002130.2		42,333.7	100.0%	2	2	8	0.0975%	14.6%
SNUS2	SNU_S2	Cluster of YBX1 protein, partial [Homo sapiens] (AAH00064.1)	YBX1 protein, partial [Homo sapiens]	AAH00064.1		29,374.2	100.0%	1	1	21	0.256%	35.7%
SNUS2	SNU_S2	Cluster of Keratin 10 [Homo sapiens] (AAH34697.1)	Keratin 10 [Homo sapiens]	AAH34697.1,EAW60681.1,NP_000412.3,P13645.6,XP_005257400.1		58,828.8	100.0%	9	9	23	0.280%	21.1%
SNUS2	SNU_S2	Cluster of YBX1 protein, partial [Homo sapiens] (AAH00064.1)	Y box binding protein-1 [Homo sapiens]	AAA61308.1		35,411.4	100.0%	1	1	17	0.207%	31.2%
SNUS2	SNU_S2	Cluster of dermcidin isoform 2 preproprotein [Homo sapiens] (NP_001287783.1)	dermcidin isoform 2 preproprotein [Homo sapiens]	NP_001287783.1,NP_444513.1		11,284.1	100.0%	2	2	2	0.0244%	18.2%
SNUS2	SNU_S2	Cluster of keratin 1 [Homo sapiens] (AAG41947.1)	Keratin 5 [Homo sapiens]	AAH24292.1,EAW96635.1,NP_000415.2		62,379.6	37.5%	0	0	1	0.0122%	1.53%
SNUS2	SNU_S2	Cluster of poly(rC)-binding protein 2 isoform b [Homo sapiens] (NP_114366.1)	hnRNP-E1 [Homo sapiens]	CAA55016.1		37,526.2	100.0%	6	7	52	0.634%	39.6%
SNUS2	SNU_S2	Cluster of heterogeneous nuclear ribonucleoprotein D0B, partial [Homo sapiens] (AAB96683.1)	heterogeneous nuclear ribonucleoprotein D0B, partial [Homo sapiens]	AAB96683.1,EAX05872.1,EAX05879.1,NP_002129.2,NP_112738.1		30,255.2	99.9%	1	1	3	0.0366%	8.05%
SNUS2	SNU_S2	Cluster of Chromosome 3 open reading frame 37 [Homo sapiens] (AAH09993.1)	Chromosome 3 open reading frame 37 [Homo sapiens]	AAH09993.1,EAW79265.1,NP_064572.2		40,575.2	100.0%	7	8	16	0.195%	22.3%
SNUS2	SNU_S2	Cluster of hnRNP G protein [Homo sapiens] (CAA80599.1)	RBM1, partial [Homo sapiens]	ABB92435.1,NP_062556.2		42,143.4	90.9%	0	0	6	0.0731%	10.7%
SNUS2	SNU_S2	Cluster of Keratin 10 [Homo sapiens] (AAH34697.1)	type I keratin 16 [Homo sapiens]	AAB35421.1,NP_005548.2		51,239.0	55.0%	0	0	9	0.110%	5.29%
SNUS2	SNU_S2	Cluster of casein kinase II subunit alpha' [Homo sapiens] (NP_001887.1)	casein kinase II subunit alpha' [Homo sapiens]	NP_001887.1		41,214.5	100.0%	5	6	48	0.585%	43.1%
SNUS2	SNU_S2	Cluster of mesenchymal stem cell protein DSC43 [Homo sapiens] (AAF65445.1)	mesenchymal stem cell protein DSC43 [Homo sapiens]	AAF65445.1,AAH26192.2,NP_057727.2		35,701.2	100.0%	3	3	3	0.0366%	10.9%
SNUS2	SNU_S2	Cluster of keratin 1 [Homo sapiens] (AAG41947.1)	epidermal cytokeratin 2 [Homo sapiens]	AAC83410.1		65,866.4	100.0%	3	3	10	0.122%	10.2%
SNUS2	SNU_S2	Cluster of casein kinase II beta subunit [Homo sapiens] (AAA52123.1)	casein kinase II beta subunit [Homo sapiens]	AAA52123.1,CCI79694.1,CCI79697.1,EAX03472.1,NP_001269314.1,NP_034105.1,XP_004043713.1		0.0	93.9%	1	1	1	0.0122%	5.12%
SNUS2	SNU_S2	Cluster of unnamed protein product [Homo sapiens] (BAC05256.1)	unnamed protein product [Homo sapiens]	BAC05256.1,BAD92445.1,BAG38000.1,CAH18071.1,EAW78207.1,NP_001230808.1,NP_004584.1		21,936.0	100.0%	3	3	3	0.0366%	10.3%
SNUS2	SNU_S2	Cluster of heterogeneous nuclear ribonucleoprotein M isoform a [Homo sapiens] (NP_005959.2)	heterogeneous nuclear ribonucleoprotein M isoform X2 [Homo sapiens]	XP_005272536.1		75,637.9	66.8%	0	0	6	0.0731%	3.93%
SNUS2	SNU_S2	Cluster of HNRPU protein [Homo sapiens] (AAH15782.1)	HNRPU protein [Homo sapiens]	AAH15782.1,BAG54384.1,NP_114032.2		79,716.0	99.0%	1	1	1	0.0122%	2.08%
SNUS2	SNU_S2	Cluster of Keratin 10 [Homo sapiens] (AAH34697.1)	Keratin 14 [Homo sapiens]	AAH02690.1,AAH42437.1,NP_000517.3		51,562.5	81.2%	0	0	9	0.110%	5.30%
SNUS2	SNU_S2	Cluster of heterogeneous nuclear ribonucleoprotein K isoform a [Homo sapiens] (NP_112553.1)	heterogeneous nuclear ribonucleoprotein K isoform a [Homo sapiens]	NP_112553.1		51,030.4	100.0%	5	5	9	0.110%	11.2%
SNUS2	SNU_S2	Cluster of unnamed protein product [Homo sapiens] (BAG62914.1)	alpha-actin [Homo sapiens]	AAA51577.1,BAF83305.1,BAH13327.1,NP_001091.1,NP_001604.1		42,052.2	99.2%	0	0	5	0.0609%	4.51%
SNUS2	SNU_S2	Cluster of Mitochondrial ribosomal protein L38 [Homo sapiens] (AAH13311.1)	Mitochondrial ribosomal protein L38 [Homo sapiens]	AAH13311.1,NP_115867.2		44,597.4	100.0%	2	2	2	0.0244%	5.49%
SNUS2	SNU_S2	Cluster of CSNK2A1 protein [Homo sapiens] (AAH50036.1)	CSNK2A1 protein [Homo sapiens]	AAH50036.1,NP_001886.1		45,909.6	100.0%	11	13	35	0.426%	31.7%
SNUS2	SNU_S2	Cluster of keratin 1 [Homo sapiens] (AAG41947.1)	keratin 1 [Homo sapiens]	AAG41947.1,AFA52002.1,AFA52004.1,AFA52005.1,AFA52007.1,NP_006112.3		66,040.3	100.0%	4	4	23	0.280%	22.2%
SNUS2	SNU_S2	Cluster of keratin 1 [Homo sapiens] (AAG41947.1)	type II keratin subunit protein, partial [Homo sapiens]	AAA36153.1		52,789.5	95.9%	0	0	17	0.207%	19.1%
SNUS2	SNU_S2	Cluster of hnRNP C2 protein [Homo sapiens] (AAA36576.1)	hnRNP C2 protein [Homo sapiens]	AAA36576.1,AAA52680.1,AAH07052.1,AAH08364.1,AAH08423.1,BAD92764.1,BAF85308.1,BAG35259.1,BAG35300.1,NP_004491.2,NP_112604.2		32,338.0	100.0%	2	2	5	0.0609%	10.6%
SNUS2	SNU_S2	Cluster of Keratin 10 [Homo sapiens] (AAH34697.1)	keratin, type I cytoskeletal 9 [Homo sapiens]	NP_000217.2		62,065.9	100.0%	7	7	15	0.183%	7.87%
SNUS3	SNU_S3	Cluster of keratin 1 [Homo sapiens] (AAG41947.1)	epidermal cytokeratin 2 [Homo sapiens]	AAC83410.1		65,866.4	100.0%	17	19	99	1.05%	48.5%
SNUS3	SNU_S3	Cluster of heterogeneous nuclear ribonucleoprotein M isoform a [Homo sapiens] (NP_005959.2)	heterogeneous nuclear ribonucleoprotein M isoform a [Homo sapiens]	NP_005959.2,NP_112480.2		77,517.3	100.0%	3	3	246	2.60%	61.6%
SNUS3	SNU_S3	Cluster of unnamed protein product [Homo sapiens] (BAB14238.1)	unnamed protein product [Homo sapiens]	BAB14238.1,BAD96382.1,CAG33494.1,EAW61095.1,NP_001244118.1,NP_061955.1		61,591.5	100.0%	3	3	3	0.0317%	6.22%
SNUS3	SNU_S3	Cluster of poly(rC)-binding protein 2 isoform b [Homo sapiens] (NP_114366.1)	unnamed protein product [Homo sapiens]	BAG59482.1		32,165.8	8.1%	0	0	0	0.000%	0.000%
SNUS3	SNU_S3	Cluster of phosphatidylinositol 4-phosphate 5-kinase type-1 alpha isoform X15 [Homo sapiens] (XP_016857928.1)	PUTATIVE PSEUDOGENE: RecName: Full=Putative PIP5K1A and PSMD4-like protein; Short=PIP5K1A-PSMD4	A2A3N6.1		95,049.9	99.9%	1	1	6	0.0634%	4.87%
SNUS3	SNU_S3	Cluster of keratin 1 [Homo sapiens] (AAG41947.1)	vimentin [Homo sapiens]	AAA61279.1,ACA06103.1,BAD96202.1,CAG28618.1,NP_003371.2		53,684.8	100.0%	2	2	5	0.0528%	7.30%
SNUS3	SNU_S3	Cluster of heterogeneous nuclear ribonucleoprotein L-like isoform X1 [Homo sapiens] (XP_005264696.2)	heterogeneous nuclear ribonucleoprotein L-like isoform X1 [Homo sapiens]	XP_005264696.2,XP_005264697.2,XP_011531467.1		63,718.9	100.0%	1	1	3	0.0317%	6.55%
SNUS3	SNU_S3	Cluster of YBX1 protein, partial [Homo sapiens] (AAH00064.1)	Y-box-binding protein 3 isoform b [Homo sapiens]	NP_001138898.1		31,946.6	99.9%	1	1	17	0.180%	37.3%
SNUS3	SNU_S3	Cluster of nucleolin [Homo sapiens] (AAA59954.1)	nucleolin [Homo sapiens]	AAA59954.1,BAC03738.1,NP_005372.2		74,326.1	100.0%	8	8	12	0.127%	11.6%
SNUS3	SNU_S3	Cluster of pyruvate kinase PKM isoform X2 [Homo sapiens] (XP_005254500.1)	pyruvate kinase PKM isoform X2 [Homo sapiens]	XP_005254500.1		64,578.8	100.0%	2	2	3	0.0317%	3.72%
SNUS3	SNU_S3	Cluster of putative DEAD-box helicase MDDX28 [Homo sapiens] (AAG59833.1)	putative DEAD-box helicase MDDX28 [Homo sapiens]	AAG59833.1,NP_060850.2		59,582.2	100.0%	13	13	17	0.180%	26.1%
SNUS3	SNU_S3	Cluster of keratin 1 [Homo sapiens] (AAG41947.1)	unnamed protein product [Homo sapiens]	BAG61442.1		58,679.9	97.8%	0	0	29	0.306%	23.8%
SNUS3	SNU_S3	Cluster of Keratin 10 [Homo sapiens] (AAH34697.1)	Keratin 18 [Homo sapiens]	AAH00698.1,BAD96813.1,BAG36700.1,CAA31377.1,NP_000215.1		47,335.1	100.0%	2	2	7	0.0739%	7.44%
SNUS3	SNU_S3	Cluster of phosphatidylinositol 4-phosphate 5-kinase type-1 alpha isoform X15 [Homo sapiens] (XP_016857928.1)	phosphatidylinositol 4-phosphate 5-kinase type-1 alpha isoform X15 [Homo sapiens]	XP_016857928.1,XP_016857929.1		54,515.6	100.0%	1	1	7	0.0739%	12.2%
SNUS3	SNU_S3	Cluster of unnamed protein product [Homo sapiens] (BAB14369.1)	unnamed protein product [Homo sapiens]	BAB14369.1,NP_001161413.1,NP_079184.2		62,555.2	100.0%	5	5	5	0.0528%	8.31%
SNUS3	SNU_S3	Cluster of CSNK2A1 protein [Homo sapiens] (AAH50036.1)	CSNK2A1 protein [Homo sapiens]	AAH50036.1,NP_001886.1		45,144.5	95.1%	1	1	1	0.0106%	3.02%
SNUS3	SNU_S3	Cluster of KHDRBS1 protein [Homo sapiens] (AAH10132.1)	KHDRBS1 protein [Homo sapiens]	AAH10132.1,BAC03643.1,BAG35762.1,BAG56883.1,NP_006550.1		48,228.2	100.0%	2	2	3	0.0317%	6.30%
SNUS3	SNU_S3	Cluster of replication protein A 70 kDa DNA-binding subunit isoform 1 [Homo sapiens] (NP_002936.1)	replication protein A1, 70kDa variant, partial [Homo sapiens]	BAD92969.1		69,430.7	100.0%	1	1	107	1.13%	44.3%
SNUS3	SNU_S3	Cluster of Myelin expression factor 2 [Homo sapiens] (AAI52421.1)	Myelin expression factor 2 [Homo sapiens]	AAI52421.1,NP_057216.3,Q9P2K5.3		64,123.6	100.0%	13	14	31	0.327%	27.0%
SNUS3	SNU_S3	Cluster of alloalbumin Venezia [Homo sapiens] (AAA98798.1)	alloalbumin Venezia [Homo sapiens]	AAA98798.1,AAF01333.1,AAG35503.1,AAN17825.1,AEE60908.1,BAF85444.1,CAA23754.1,EAX05666.1,NP_000468.1		68,613.1	100.0%	6	7	20	0.211%	10.6%
SNUS3	SNU_S3	Cluster of dhfr oribeta-binding protein RIP60 [Homo sapiens] (AAF26712.1)	dhfr oribeta-binding protein RIP60 [Homo sapiens]	AAF26712.1,AAH01760.1,AAS00386.1,BAF85359.1,CAB53100.1,NP_001093165.1,NP_001093166.1,XP_006716013.1		63,573.9	100.0%	3	3	3	0.0317%	7.76%
SNUS3	SNU_S3	Cluster of far upstream element-binding protein 3 [Homo sapiens] (NP_003925.1)	far upstream element-binding protein 3 [Homo sapiens]	NP_003925.1,XP_005272289.1,XP_011517474.1		61,639.9	100.0%	6	6	13	0.137%	17.0%
SNUS3	SNU_S3	Cluster of casein kinase II beta subunit [Homo sapiens] (AAA52123.1)	casein kinase II beta subunit [Homo sapiens]	AAA52123.1,CCI79694.1,CCI79697.1,EAX03472.1,NP_001269314.1,NP_034105.1,XP_004043713.1		0.0	100.0%	2	2	2	0.0211%	11.6%
SNUS3	SNU_S3	Cluster of Keratin 10 [Homo sapiens] (AAH34697.1)	Keratin 10 [Homo sapiens]	AAH34697.1,EAW60681.1,NP_000412.3,P13645.6,XP_005257400.1		58,828.8	100.0%	22	25	98	1.04%	43.8%
SNUS3	SNU_S3	Cluster of mRNA-binding protein CRDBP [Homo sapiens] (AAF37203.1)	mRNA-binding protein CRDBP [Homo sapiens]	AAF37203.1,NP_006537.3,XP_016879511.1		63,480.5	100.0%	6	6	8	0.0845%	10.6%
SNUS3	SNU_S3	Cluster of YBX1 protein, partial [Homo sapiens] (AAH00064.1)	YBX1 protein, partial [Homo sapiens]	AAH00064.1		29,374.2	100.0%	1	1	14	0.148%	27.8%
SNUS3	SNU_S3	Cluster of keratin 1 [Homo sapiens] (AAG41947.1)	Keratin 5 [Homo sapiens]	AAH24292.1,EAW96635.1,NP_000415.2		62,379.6	100.0%	9	9	29	0.306%	28.3%
SNUS3	SNU_S3	Cluster of heat shock protein 60 [Homo sapiens] (ABB01006.1)	heat shock protein 60 [Homo sapiens]	ABB01006.1,ACE06961.1,BAH12833.1,NP_002147.2		60,681.3	100.0%	9	9	16	0.169%	21.4%
SNUS3	SNU_S3	Cluster of Keratin 10 [Homo sapiens] (AAH34697.1)	type I keratin 16 [Homo sapiens]	AAB35421.1,NP_005548.2		51,239.0	100.0%	3	3	25	0.264%	18.2%
SNUS3	SNU_S3	Cluster of PATZ [Homo sapiens] (AAF32518.1)	PATZ [Homo sapiens]	AAF32518.1,AAF99602.1,BAD92024.1,BAF84492.1,CAB51404.1,NP_055138.2,NP_114439.1,NP_114440.1,NP_114441.1		74,060.3	100.0%	3	3	3	0.0317%	5.96%
SNUS3	SNU_S3	Cluster of RNA-binding protein 39 isoform e [Homo sapiens] (NP_001310351.1)	RNA-binding protein 39 isoform e [Homo sapiens]	NP_001310351.1,NP_001310353.1,NP_004893.1,NP_909122.1		59,381.4	100.0%	11	12	31	0.327%	27.3%
SNUS3	SNU_S3	Cluster of YBX1 protein, partial [Homo sapiens] (AAH00064.1)	DNA-binding protein A, partial [Homo sapiens]	AAA35749.1		44,611.1	100.0%	3	4	30	0.317%	31.3%
SNUS3	SNU_S3	Cluster of heterogeneous nuclear ribonucleoprotein M isoform a [Homo sapiens] (NP_005959.2)	heterogeneous nuclear ribonucleoprotein M isoform X2 [Homo sapiens]	XP_005272536.1		75,637.9	100.0%	1	1	232	2.45%	61.5%
SNUS3	SNU_S3	Cluster of unnamed protein product [Homo sapiens] (BAG60103.1)	unnamed protein product [Homo sapiens]	BAG60103.1,NP_001307526.1,NP_004387.1		69,149.7	100.0%	10	10	18	0.190%	19.2%
SNUS3	SNU_S3	Cluster of unnamed protein product [Homo sapiens] (BAC03595.1)	unnamed protein product [Homo sapiens]	BAC03595.1,NP_060658.3		71,358.1	100.0%	1	1	5	0.0528%	7.10%
SNUS3	SNU_S3	Cluster of endonuclease 8-like 3 [Homo sapiens] (NP_060718.3)	endonuclease 8-like 3 [Homo sapiens]	NP_060718.3		67,769.7	100.0%	1	1	20	0.211%	19.3%
SNUS3	SNU_S3	Cluster of HNRPU protein [Homo sapiens] (AAH15782.1)	HNRPU protein [Homo sapiens]	AAH15782.1,BAG54384.1,NP_114032.2		79,716.0	99.9%	1	1	1	0.0106%	2.49%
SNUS3	SNU_S3	Cluster of ZNF498 protein, partial [Homo sapiens] (AAH69644.2)	ZNF498 protein, partial [Homo sapiens]	AAH69644.2,AAH89402.1,AAI14574.1,NP_660090.2		61,473.2	100.0%	2	2	2	0.0211%	4.44%
SNUS3	SNU_S3	Cluster of Keratin 10 [Homo sapiens] (AAH34697.1)	Keratin 14 [Homo sapiens]	AAH02690.1,AAH42437.1,NP_000517.3		51,562.5	100.0%	2	2	24	0.254%	15.7%
SNUS3	SNU_S3	Cluster of heterogeneous nuclear ribonucleoprotein K isoform a [Homo sapiens] (NP_112553.1)	heterogeneous nuclear ribonucleoprotein K isoform a [Homo sapiens]	NP_112553.1		51,030.4	100.0%	29	42	433	4.57%	52.2%
SNUS3	SNU_S3	Cluster of Ribonuclease/angiogenin inhibitor 1 [Homo sapiens] (AAH00677.1)	Ribonuclease/angiogenin inhibitor 1 [Homo sapiens]	AAH00677.1,CAA32151.1,EAX02330.1,EAX02335.1,NP_002930.2		49,974.4	99.7%	1	1	1	0.0106%	3.04%
SNUS3	SNU_S3	Cluster of HNRNPL protein, partial [Homo sapiens] (AAH69184.2)	HNRNPL protein, partial [Homo sapiens]	AAH69184.2,BAB18649.1,BAG36406.1,CAA34261.1,EAW56826.1,EAW56827.1,NP_001524.2,XP_005589190.1,XP_024307248.1,XP_024307249.1		64,132.8	100.0%	3	3	3	0.0317%	6.12%
SNUS3	SNU_S3	Cluster of splicing factor U2AF 65 kDa subunit isoform b [Homo sapiens] (NP_001012496.1)	splicing factor U2AF 65 kDa subunit isoform b [Homo sapiens]	NP_001012496.1,NP_009210.1		53,501.2	100.0%	9	13	32	0.338%	26.5%
SNUS3	SNU_S3	Cluster of glioma tumor suppressor candidate region protein 2 [Homo sapiens] (AAF62873.1)	glioma tumor suppressor candidate region protein 2 [Homo sapiens]	AAF62873.1,AAG30413.1,AAH04229.2,AAH07248.1,AAH14009.2,BAG60201.1,BAG62713.1,BAG64275.1,BAG64846.1,CAB94786.1,CAB94787.1,EAW57508.1,NP_056525.2		54,390.7	100.0%	3	3	5	0.0528%	6.69%
SNUS3	SNU_S3	Cluster of replication protein A 70 kDa DNA-binding subunit isoform 1 [Homo sapiens] (NP_002936.1)	replication protein A 70 kDa DNA-binding subunit isoform 1 [Homo sapiens]	NP_002936.1		68,139.0	100.0%	1	1	112	1.18%	45.8%
SNUS3	SNU_S3	Cluster of YBX1 protein, partial [Homo sapiens] (AAH00064.1)	Y box binding protein-1 [Homo sapiens]	AAA61308.1		35,411.4	99.5%	0	0	10	0.106%	17.4%
SNUS3	SNU_S3	Cluster of keratin 1 [Homo sapiens] (AAG41947.1)	type II keratin subunit protein, partial [Homo sapiens]	AAA36153.1		52,789.5	99.0%	0	0	80	0.845%	25.6%
SNUS3	SNU_S3	Cluster of keratin 1 [Homo sapiens] (AAG41947.1)	keratin 1 [Homo sapiens]	AAG41947.1,AFA52002.1,AFA52004.1,AFA52005.1,AFA52007.1,NP_006112.3		66,040.3	100.0%	11	13	128	1.35%	42.4%
SNUS3	SNU_S3	Cluster of Keratin 10 [Homo sapiens] (AAH34697.1)	keratin, type I cytoskeletal 9 [Homo sapiens]	NP_000217.2		62,065.9	100.0%	15	17	45	0.475%	30.7%
SNUS3	SNU_S3	Cluster of HNRPR protein, partial [Homo sapiens] (AAI10390.1)	HNRPR protein, partial [Homo sapiens]	AAI10390.1,BAG35961.1,NP_001095867.1,NP_005817.1		59,682.5	100.0%	2	2	6	0.0634%	8.40%
SNUS3	SNU_S3	Cluster of coactivator activator [Homo sapiens] (AAK77961.1)	coactivator activator [Homo sapiens]	AAK77961.1,NP_006319.1		69,492.3	100.0%	16	17	41	0.433%	26.3%
SNUA2	SNU_A2_210604111054	Cluster of hnRNP G protein [Homo sapiens] (CAA80599.1)	hnRNP G protein [Homo sapiens]	CAA80599.1,NP_002130.2		42,333.7	99.9%	1	1	2	0.0250%	5.63%
SNUA2	SNU_A2_210604111054	Cluster of YBX1 protein, partial [Homo sapiens] (AAH00064.1)	DNA-binding protein A, partial [Homo sapiens]	AAA35749.1		44,611.1	93.5%	0	0	31	0.387%	14.3%
SNUA2	SNU_A2_210604111054	Cluster of heterogeneous nuclear ribonucleoprotein AB isoform a variant, partial [Homo sapiens] (BAD97145.1)	heterogeneous nuclear ribonucleoprotein AB isoform a variant, partial [Homo sapiens]	BAD97145.1,BAG60045.1,NP_004490.2,NP_112556.2		35,996.0	9.5%	0	0	2	0.0250%	3.01%
SNUA2	SNU_A2_210604111054	Cluster of Keratin 10 [Homo sapiens] (AAH34697.1)	Keratin 18 [Homo sapiens]	AAH00698.1,BAD96813.1,BAG36700.1,CAA31377.1,NP_000215.1		47,335.1	100.0%	1	1	5	0.0624%	4.42%
SNUA2	SNU_A2_210604111054	Cluster of RNA-binding motif, single-stranded-interacting protein 2 isoform X3 [Homo sapiens] (XP_005269116.1)	RNA-binding motif, single-stranded-interacting protein 2 isoform X3 [Homo sapiens]	XP_005269116.1,XP_005269117.1		45,637.9	100.0%	8	9	33	0.412%	23.4%
SNUA2	SNU_A2_210604111054	Cluster of Keratin 10 [Homo sapiens] (AAH34697.1)	Keratin 10 [Homo sapiens]	AAH34697.1,EAW60681.1,NP_000412.3,P13645.6,XP_005257400.1		58,828.8	100.0%	13	13	50	0.624%	31.0%
SNUA2	SNU_A2_210604111054	Cluster of Eukaryotic translation elongation factor 1 gamma [Homo sapiens] (AAH13918.1)	Eukaryotic translation elongation factor 1 gamma [Homo sapiens]	AAH13918.1,BAG62369.1,NP_001395.1		50,119.4	100.0%	2	2	2	0.0250%	5.26%
SNUA2	SNU_A2_210604111054	Cluster of Keratin 10 [Homo sapiens] (AAH34697.1)	type I keratin 16 [Homo sapiens]	AAB35421.1,NP_005548.2		51,239.0	88.8%	0	0	15	0.187%	5.29%
SNUA2	SNU_A2_210604111054	Cluster of keratin 1 [Homo sapiens] (AAG41947.1)	Keratin 5 [Homo sapiens]	AAH24292.1,EAW96635.1,NP_000415.2		62,379.6	100.0%	2	2	7	0.0874%	7.63%
SNUA2	SNU_A2_210604111054	Cluster of Keratin 10 [Homo sapiens] (AAH34697.1)	Keratin 14 [Homo sapiens]	AAH02690.1,AAH42437.1,NP_000517.3		51,562.5	100.0%	1	1	17	0.212%	11.2%
SNUA2	SNU_A2_210604111054	Cluster of epididymis secretory sperm binding protein, partial [Homo sapiens] (ADO22487.1)	epididymis secretory sperm binding protein, partial [Homo sapiens]	ADO22487.1		49,468.3	100.0%	3	3	37	0.462%	26.9%
SNUA2	SNU_A2_210604111054	Cluster of Eukaryotic translation elongation factor 1 alpha 1 [Homo sapiens] (AAH71727.1)	Eukaryotic translation elongation factor 1 alpha 1 [Homo sapiens]	AAH71727.1,AAH71841.1,BAD96243.1,BAD96271.1,BAD96702.1,BAD96750.1,BAD96766.1,CAA34756.1,Q5VTE0.1		50,199.2	100.0%	3	3	12	0.150%	10.4%
SNUA2	SNU_A2_210604111054	Cluster of keratin 1 [Homo sapiens] (AAG41947.1)	unnamed protein product [Homo sapiens]	BAG61442.1		58,679.9	65.8%	0	0	9	0.112%	8.59%
SNUA2	SNU_A2_210604111054	Cluster of ribosomal protein L4 variant, partial [Homo sapiens] (BAD92214.1)	ribosomal protein L4 variant, partial [Homo sapiens]	BAD92214.1,EAW77773.1,EAW77774.1,NP_000959.2		52,944.7	100.0%	2	2	2	0.0250%	5.22%
SNUA2	SNU_A2_210604111054	Cluster of CGI-44 protein [Homo sapiens] (AAD34039.1)	CGI-44 protein [Homo sapiens]	AAD34039.1,AAF22029.1,BAD96183.1,BAG35933.1,EAW77320.1,NP_067022.1		54,963.2	100.0%	3	3	3	0.0375%	7.78%
SNUA2	SNU_A2_210604111054	Cluster of Hydroxyacyl-Coenzyme A dehydrogenase/3-ketoacyl-Coenzyme A thiolase/enoyl-Coenzyme A hydratase (trifunctional protein), beta subunit [Homo sapiens] (AAH14572.1)	Hydroxyacyl-Coenzyme A dehydrogenase/3-ketoacyl-Coenzyme A thiolase/enoyl-Coenzyme A hydratase (trifunctional protein), beta subunit [Homo sapiens]	AAH14572.1,BAA22061.1,BAG56690.1,BAG63658.1,NP_000174.1,NP_001029291.1,NP_001268441.1,NP_001268442.1,XP_024308598.1		51,296.0	100.0%	2	2	2	0.0250%	3.79%
SNUA2	SNU_A2_210604111054	Cluster of YBX1 protein, partial [Homo sapiens] (AAH00064.1)	Y box binding protein-1 [Homo sapiens]	AAA61308.1		35,411.4	100.0%	1	2	124	1.55%	44.8%
SNUA2	SNU_A2_210604111054	Cluster of heterogeneous nuclear ribonucleoprotein D0B, partial [Homo sapiens] (AAB96683.1)	heterogeneous nuclear ribonucleoprotein D0B, partial [Homo sapiens]	AAB96683.1,EAX05872.1,EAX05879.1,NP_002129.2,NP_112738.1		30,255.2	100.0%	2	2	4	0.0500%	10.7%
SNUA2	SNU_A2_210604111054	Cluster of keratin 1 [Homo sapiens] (AAG41947.1)	vimentin [Homo sapiens]	AAA61279.1,ACA06103.1,BAD96202.1,CAG28618.1,NP_003371.2		53,684.8	100.0%	3	3	4	0.0500%	8.80%
SNUA2	SNU_A2_210604111054	Cluster of ataxin-10 isoform 1 [Homo sapiens] (NP_037368.1)	ataxin-10 isoform 1 [Homo sapiens]	NP_037368.1		53,490.8	100.0%	13	13	19	0.237%	33.3%
SNUA2	SNU_A2_210604111054	Cluster of YBX1 protein, partial [Homo sapiens] (AAH00064.1)	YBX1 protein, partial [Homo sapiens]	AAH00064.1		29,374.2	100.0%	1	1	132	1.65%	47.0%
SNUA2	SNU_A2_210604111054	Cluster of HNRPU protein [Homo sapiens] (AAH15782.1)	HNRPU protein [Homo sapiens]	AAH15782.1,BAG54384.1,NP_114032.2		83,085.8	100.0%	2	2	3	0.0375%	3.60%
SNUA2	SNU_A2_210604111054	Cluster of elongation factor Tu [Homo sapiens] (AAB00499.1)	elongation factor Tu [Homo sapiens]	AAB00499.1,AAC60647.1,NP_003312.3,P49411.2		49,875.8	100.0%	2	2	3	0.0375%	5.09%
SNUA2	SNU_A2_210604111054	Cluster of RNA-binding motif, single-stranded-interacting protein 1 isoform X3 [Homo sapiens] (XP_005246796.1)	RNA-binding motif, single-stranded-interacting protein 1 isoform X3 [Homo sapiens]	XP_005246796.1,XP_005246798.1		45,503.7	100.0%	6	7	39	0.487%	23.8%
SNUA2	SNU_A2_210604111054	Cluster of Ribonuclease/angiogenin inhibitor 1 [Homo sapiens] (AAH00677.1)	Ribonuclease/angiogenin inhibitor 1 [Homo sapiens]	AAH00677.1,CAA32151.1,EAX02330.1,EAX02335.1,NP_002930.2		49,955.3	100.0%	2	2	2	0.0250%	5.64%
SNUA2	SNU_A2_210604111054	Cluster of keratin 1 [Homo sapiens] (AAG41947.1)	keratin 1 [Homo sapiens]	AAG41947.1,AFA52002.1,AFA52004.1,AFA52005.1,AFA52007.1,NP_006112.3		66,040.3	100.0%	3	3	37	0.462%	23.3%
SNUA2	SNU_A2_210604111054	Cluster of ribosomal protein L3, isoform CRA_f [Homo sapiens] (EAW60315.1)	ribosomal protein L3, isoform CRA_f [Homo sapiens]	EAW60315.1		48,818.8	100.0%	2	2	3	0.0375%	3.26%
SNUA2	SNU_A2_210604111054	Cluster of Keratin 10 [Homo sapiens] (AAH34697.1)	keratin, type I cytoskeletal 9 [Homo sapiens]	NP_000217.2		62,065.9	100.0%	3	3	4	0.0500%	6.26%
SNUA2	SNU_A2_210604111054	Cluster of splicing factor U2AF 65 kDa subunit isoform b [Homo sapiens] (NP_001012496.1)	splicing factor U2AF 65 kDa subunit isoform b [Homo sapiens]	NP_001012496.1,NP_009210.1		53,501.2	100.0%	1	1	2	0.0250%	2.12%
SNUA2	SNU_A2_210604111054	Cluster of hnRNP G protein [Homo sapiens] (CAA80599.1)	RBM1, partial [Homo sapiens]	ABB92435.1,NP_062556.2		42,143.4	47.6%	0	0	1	0.0125%	3.65%
SNUA2	SNU_A2_210604111054	Cluster of keratin 1 [Homo sapiens] (AAG41947.1)	type II keratin subunit protein, partial [Homo sapiens]	AAA36153.1		52,789.5	83.9%	0	0	24	0.300%	21.3%
SNUA2	SNU_A2_210604111054	Cluster of alloalbumin Venezia [Homo sapiens] (AAA98798.1)	alloalbumin Venezia [Homo sapiens]	AAA98798.1,AAF01333.1,AAG35503.1,AAN17825.1,AEE60908.1,BAF85444.1,CAA23754.1,EAX05666.1,NP_000468.1		68,613.1	100.0%	6	6	11	0.137%	8.28%
SNUA2	SNU_A2_210604111054	Cluster of unnamed protein product [Homo sapiens] (BAG60373.1)	unnamed protein product [Homo sapiens]	BAG60373.1		21,031.0	100.0%	2	2	4	0.0500%	14.0%
SNUA2	SNU_A2_210604111054	Cluster of THAP domain containing 11 [Homo sapiens] (AAH12182.1)	THAP domain containing 11 [Homo sapiens]	AAH12182.1,EAW83180.1,NP_065190.2		42,126.5	100.0%	2	2	5	0.0624%	5.43%
SNUA2	SNU_A2_210604111054	Cluster of unnamed protein product [Homo sapiens] (BAG51785.1)	unnamed protein product [Homo sapiens]	BAG51785.1,BAG52918.1		46,241.5	100.0%	1	1	26	0.325%	31.0%
SNUA2	SNU_A2_210604111054	Cluster of RNA-binding protein 45 isoform 2 [Homo sapiens] (NP_001352508.1)	RNA-binding protein 45 isoform 2 [Homo sapiens]	NP_001352508.1,NP_694453.2		53,503.2	100.0%	2	2	3	0.0375%	5.25%
SNUA2	SNU_A2_210604111054	Cluster of YBX1 protein, partial [Homo sapiens] (AAH00064.1)	Y-box-binding protein 3 isoform b [Homo sapiens]	NP_001138898.1		31,946.6	24.2%	0	0	31	0.387%	19.5%
SNUA2	SNU_A2_210604111054	Cluster of unnamed protein product [Homo sapiens] (BAG51785.1)	tubulin alpha-1C chain isoform a [Homo sapiens]	NP_001290043.1		57,730.6	100.0%	1	1	26	0.325%	24.9%
SNUA2	SNU_A2_210604111054	Cluster of unnamed protein product [Homo sapiens] (BAG62914.1)	alpha-actin [Homo sapiens]	AAA51577.1,BAF83305.1,BAH13327.1,NP_001091.1,NP_001604.1		42,052.2	7.5%	0	0	0	0.000%	0.000%
SNUA2	SNU_A2_210604111054	Cluster of keratin 1 [Homo sapiens] (AAG41947.1)	epidermal cytokeratin 2 [Homo sapiens]	AAC83410.1		65,866.4	100.0%	7	7	28	0.350%	20.0%
