# Supplementary material for: Circular RNA hsa_circ_0062682 Binds to YBX1 and Promotes Oncogenesis in Hepatocellular Carcinoma
Source: Cancers (Basel). 2022 Sep 19;14(18):4524. doi: 10.3390/cancers14184524 (PMC9497178; doi:10.3390/cancers14184524)
Supplement: Supplementary file 1 [file cancers-14-04524-s001.zip › Table S10.xlsx]

## Sheet: Huh-7 Reactome
Enriched Reactome pathways in STRING analysis from analyzed proteins in the Huh-7 OE pulldown
#term ID	term description	observed gene count	background gene count	strength	false discovery rate	matching proteins in your network (IDs)	matching proteins in your network (labels)
HSA-1430728	Metabolism	61	2089	0.44	2.63e-10	9606.ENSP00000003100,9606.ENSP00000157812,9606.ENSP00000216254,9606.ENSP00000216951,9606.ENSP00000217244,9606.ENSP00000217426,9606.ENSP00000221130,9606.ENSP00000221957,9606.ENSP00000229239,9606.ENSP00000234590,9606.ENSP00000236959,9606.ENSP00000245206,9606.ENSP00000261733,9606.ENSP00000262030,9606.ENSP00000264161,9606.ENSP00000265594,9606.ENSP00000265838,9606.ENSP00000270776,9606.ENSP00000278840,…	CYP51A1,PSMC4,ACO2,GSS,CSNK2A1,AHCY,GSR,PLIN3,GAPDH,ENO1,ATIC,GOT2,ALDH2,ATP5B,DARS,MCCC1,ACAT1,PGD,FADS2,ALB,ALDH1A1,CKB,SEC23A,PSMD2,UGDH,PKM,TALDO1,PPP2R1A,HADHB,MDH2,GLUD2,IDH2,SHMT2,HSP90AA1,DLST,MCCC2,PFKM,RPSA,PSMD12,ARG1,PHGDH,GOT1,ACADM,ALDH18A1,DHCR24,HSP90AB1,PGK1,SLC3A2,AKR1C1,SEC13,PC,ALDOA,ATP5A1,PLD3,IDH1,PSMD13,GPI,ENO2,MDH1,PSMC3,ADSL
HSA-70326	Glucose metabolism	15	92	1.19	3.91e-10	9606.ENSP00000229239,9606.ENSP00000234590,9606.ENSP00000245206,9606.ENSP00000320171,9606.ENSP00000324804,9606.ENSP00000327070,9606.ENSP00000345771,9606.ENSP00000359539,9606.ENSP00000362413,9606.ENSP00000373312,9606.ENSP00000377532,9606.ENSP00000378669,9606.ENSP00000405573,9606.ENSP00000437402,9606.ENSP00000438144	GAPDH,ENO1,GOT2,PKM,PPP2R1A,MDH2,PFKM,GOT1,PGK1,SEC13,PC,ALDOA,GPI,ENO2,MDH1
HSA-70263	Gluconeogenesis	11	34	1.49	6.48e-10	9606.ENSP00000229239,9606.ENSP00000234590,9606.ENSP00000245206,9606.ENSP00000327070,9606.ENSP00000359539,9606.ENSP00000362413,9606.ENSP00000377532,9606.ENSP00000378669,9606.ENSP00000405573,9606.ENSP00000437402,9606.ENSP00000438144	GAPDH,ENO1,GOT2,MDH2,GOT1,PGK1,PC,ALDOA,GPI,ENO2,MDH1
HSA-390450	Folding of actin by CCT/TriC	8	10	1.88	2.63e-09	9606.ENSP00000258091,9606.ENSP00000275603,9606.ENSP00000280326,9606.ENSP00000286788,9606.ENSP00000295688,9606.ENSP00000299300,9606.ENSP00000317334,9606.ENSP00000377958	CCT7,CCT6A,CCT5,CCT8,CCT3,CCT2,TCP1,CCT4
HSA-8953854	Metabolism of RNA	31	659	0.65	2.88e-09	9606.ENSP00000157812,9606.ENSP00000216727,9606.ENSP00000258729,9606.ENSP00000283179,9606.ENSP00000290341,9606.ENSP00000293831,9606.ENSP00000305556,9606.ENSP00000307863,9606.ENSP00000310129,9606.ENSP00000316042,9606.ENSP00000318195,9606.ENSP00000324804,9606.ENSP00000325376,9606.ENSP00000336712,9606.ENSP00000341826,9606.ENSP00000346067,9606.ENSP00000346694,9606.ENSP00000348442,9606.ENSP00000349168,…	PSMC4,PABPN1,IGF2BP3,HNRNPU,IGF2BP1,EIF4A1,PCBP1,U2AF2,PSMD2,HNRNPA0,NCL,PPP2R1A,HNRNPM,TNPO1,HNRNPA1,RPSA,HNRNPA2B1,PSMD12,HNRNPH1,PCBP2,RBMX,YBX1,HNRNPK,DDX1,SEC13,DDX39B,KHSRP,PSMD13,GSPT1,HNRNPC,PSMC3
HSA-392499	Metabolism of proteins	55	1977	0.42	6.77e-09	9606.ENSP00000054950,9606.ENSP00000157812,9606.ENSP00000217244,9606.ENSP00000237530,9606.ENSP00000254719,9606.ENSP00000256854,9606.ENSP00000258091,9606.ENSP00000261601,9606.ENSP00000261772,9606.ENSP00000264161,9606.ENSP00000275603,9606.ENSP00000280326,9606.ENSP00000286788,9606.ENSP00000293831,9606.ENSP00000295688,9606.ENSP00000295897,9606.ENSP00000296930,9606.ENSP00000299300,9606.ENSP00000299767,…	RCN1,PSMC4,CSNK2A1,RPN2,RPA1,NARS,CCT7,USP14,AARS,DARS,CCT6A,CCT5,CCT8,EIF4A1,CCT3,ALB,NPM1,CCT2,HSP90B1,PDIA3,SEC23A,EEF2,PSMD2,TCP1,TUBB6,CALR,TUFM,HSPA5,CUL1,P4HB,EEF1G,GANAB,RPSA,BLM,PSMD12,GMPPA,VCP,PARP1,HDGF,EIF3I,HNRNPK,RBBP7,CARS,SEC13,CCT4,DDX17,KHSRP,PDIA6,TARS,PSMD13,GSPT1,EEF1D,HNRNPC,PRKCSH,PSMC3
HSA-389960	Formation of tubulin folding intermediates by CCT/TriC	9	24	1.55	1.17e-08	9606.ENSP00000258091,9606.ENSP00000275603,9606.ENSP00000280326,9606.ENSP00000286788,9606.ENSP00000295688,9606.ENSP00000299300,9606.ENSP00000317334,9606.ENSP00000318697,9606.ENSP00000377958	CCT7,CCT6A,CCT5,CCT8,CCT3,CCT2,TCP1,TUBB6,CCT4
HSA-389957	Prefoldin mediated transfer of substrate to CCT/TriC	9	27	1.5	2.43e-08	9606.ENSP00000258091,9606.ENSP00000275603,9606.ENSP00000280326,9606.ENSP00000286788,9606.ENSP00000295688,9606.ENSP00000299300,9606.ENSP00000317334,9606.ENSP00000318697,9606.ENSP00000377958	CCT7,CCT6A,CCT5,CCT8,CCT3,CCT2,TCP1,TUBB6,CCT4
HSA-71291	Metabolism of amino acids and derivatives	21	365	0.74	1.57e-07	9606.ENSP00000157812,9606.ENSP00000217426,9606.ENSP00000221130,9606.ENSP00000245206,9606.ENSP00000264161,9606.ENSP00000265594,9606.ENSP00000265838,9606.ENSP00000299198,9606.ENSP00000310129,9606.ENSP00000327589,9606.ENSP00000335304,9606.ENSP00000343657,9606.ENSP00000346067,9606.ENSP00000348442,9606.ENSP00000349446,9606.ENSP00000358417,9606.ENSP00000359539,9606.ENSP00000360268,9606.ENSP00000367123,…	PSMC4,AHCY,GSR,GOT2,DARS,MCCC1,ACAT1,CKB,PSMD2,GLUD2,DLST,MCCC2,RPSA,PSMD12,ARG1,PHGDH,GOT1,ALDH18A1,SLC3A2,PSMD13,PSMC3
HSA-6814122	Cooperation of PDCL (PhLP1) and TRiC/CCT in G-protein beta folding	9	42	1.31	5e-07	9606.ENSP00000217244,9606.ENSP00000258091,9606.ENSP00000275603,9606.ENSP00000280326,9606.ENSP00000286788,9606.ENSP00000295688,9606.ENSP00000299300,9606.ENSP00000317334,9606.ENSP00000377958	CSNK2A1,CCT7,CCT6A,CCT5,CCT8,CCT3,CCT2,TCP1,CCT4
HSA-71387	Metabolism of carbohydrates	18	292	0.77	8.27e-07	9606.ENSP00000229239,9606.ENSP00000234590,9606.ENSP00000245206,9606.ENSP00000270776,9606.ENSP00000297785,9606.ENSP00000320171,9606.ENSP00000321259,9606.ENSP00000324804,9606.ENSP00000327070,9606.ENSP00000345771,9606.ENSP00000359539,9606.ENSP00000362413,9606.ENSP00000373312,9606.ENSP00000377532,9606.ENSP00000378669,9606.ENSP00000405573,9606.ENSP00000437402,9606.ENSP00000438144	GAPDH,ENO1,GOT2,PGD,ALDH1A1,PKM,TALDO1,PPP2R1A,MDH2,PFKM,GOT1,PGK1,SEC13,PC,ALDOA,GPI,ENO2,MDH1
HSA-72203	Processing of Capped Intron-Containing Pre-mRNA	16	238	0.81	1.81e-06	9606.ENSP00000216727,9606.ENSP00000283179,9606.ENSP00000305556,9606.ENSP00000307863,9606.ENSP00000316042,9606.ENSP00000325376,9606.ENSP00000341826,9606.ENSP00000346694,9606.ENSP00000349168,9606.ENSP00000352438,9606.ENSP00000359645,9606.ENSP00000361626,9606.ENSP00000365439,9606.ENSP00000373312,9606.ENSP00000379475,9606.ENSP00000451291	PABPN1,HNRNPU,PCBP1,U2AF2,HNRNPA0,HNRNPM,HNRNPA1,HNRNPA2B1,HNRNPH1,PCBP2,RBMX,YBX1,HNRNPK,SEC13,DDX39B,HNRNPC
HSA-70171	Glycolysis	10	72	1.12	2.09e-06	9606.ENSP00000229239,9606.ENSP00000234590,9606.ENSP00000320171,9606.ENSP00000324804,9606.ENSP00000345771,9606.ENSP00000362413,9606.ENSP00000373312,9606.ENSP00000378669,9606.ENSP00000405573,9606.ENSP00000437402	GAPDH,ENO1,PKM,PPP2R1A,PFKM,PGK1,SEC13,ALDOA,GPI,ENO2
HSA-72163	mRNA Splicing - Major Pathway	14	178	0.87	2.12e-06	9606.ENSP00000216727,9606.ENSP00000283179,9606.ENSP00000305556,9606.ENSP00000307863,9606.ENSP00000316042,9606.ENSP00000325376,9606.ENSP00000341826,9606.ENSP00000346694,9606.ENSP00000349168,9606.ENSP00000352438,9606.ENSP00000359645,9606.ENSP00000361626,9606.ENSP00000365439,9606.ENSP00000451291	PABPN1,HNRNPU,PCBP1,U2AF2,HNRNPA0,HNRNPM,HNRNPA1,HNRNPA2B1,HNRNPH1,PCBP2,RBMX,YBX1,HNRNPK,HNRNPC
HSA-1852241	Organelle biogenesis and maintenance	17	290	0.75	3.34e-06	9606.ENSP00000262030,9606.ENSP00000280326,9606.ENSP00000286788,9606.ENSP00000295688,9606.ENSP00000299300,9606.ENSP00000317334,9606.ENSP00000318697,9606.ENSP00000324804,9606.ENSP00000327589,9606.ENSP00000331897,9606.ENSP00000335153,9606.ENSP00000336712,9606.ENSP00000377958,9606.ENSP00000381736,9606.ENSP00000387262,9606.ENSP00000419665,9606.ENSP00000479861	ATP5B,CCT5,CCT8,CCT3,CCT2,TCP1,TUBB6,PPP2R1A,GLUD2,IDH2,HSP90AA1,TNPO1,CCT4,ATP5A1,IMMT,SSBP1,SEPT2
HSA-390471	Association of TriC/CCT with target proteins during biosynthesis	8	39	1.29	3.34e-06	9606.ENSP00000258091,9606.ENSP00000275603,9606.ENSP00000280326,9606.ENSP00000286788,9606.ENSP00000295688,9606.ENSP00000299300,9606.ENSP00000317334,9606.ENSP00000377958	CCT7,CCT6A,CCT5,CCT8,CCT3,CCT2,TCP1,CCT4
HSA-1643685	Disease	41	1548	0.4	5.53e-06	9606.ENSP00000157812,9606.ENSP00000216727,9606.ENSP00000216951,9606.ENSP00000217426,9606.ENSP00000234590,9606.ENSP00000237530,9606.ENSP00000265594,9606.ENSP00000276461,9606.ENSP00000278412,9606.ENSP00000296930,9606.ENSP00000302486,9606.ENSP00000307940,9606.ENSP00000310129,9606.ENSP00000318697,9606.ENSP00000320866,9606.ENSP00000321259,9606.ENSP00000324804,9606.ENSP00000326804,9606.ENSP00000335153,…	PSMC4,PABPN1,GSS,AHCY,ENO1,RPN2,MCCC1,ERLIN2,SSRP1,NPM1,MAP2K1,EEF2,PSMD2,TUBB6,CALR,TALDO1,PPP2R1A,CUL1,HSP90AA1,CAMK2D,GANAB,MCCC2,RPSA,PSMD12,VCP,STAT1,PARP1,ATP1B1,HSP90AB1,PGK1,HNRNPK,SLC3A2,RBBP7,SEC13,PC,IDH1,PSMD13,ATP1A1,ACTG1,PRKCSH,PSMC3
HSA-168256	Immune System	47	1956	0.36	8.09e-06	9606.ENSP00000157812,9606.ENSP00000261714,9606.ENSP00000286788,9606.ENSP00000293831,9606.ENSP00000299300,9606.ENSP00000299767,9606.ENSP00000300289,9606.ENSP00000302486,9606.ENSP00000302886,9606.ENSP00000306881,9606.ENSP00000307940,9606.ENSP00000310129,9606.ENSP00000317334,9606.ENSP00000318697,9606.ENSP00000320171,9606.ENSP00000320866,9606.ENSP00000321259,9606.ENSP00000324173,9606.ENSP00000324804,…	PSMC4,BLMH,CCT8,EIF4A1,CCT2,HSP90B1,PDIA3,MAP2K1,PA2G4,SEC23A,EEF2,PSMD2,TCP1,TUBB6,PKM,CALR,TALDO1,HSPA5,PPP2R1A,CUL1,P4HB,HSP90AA1,CAMK2D,ANXA2,HNRNPA2B1,PSMD12,ARG1,VCP,PCBP2,STAT1,ILF2,S100A8,UFL1,HSP90AB1,RPS6KA3,GDI2,TRIM71,SEC13,ALDOA,PLD3,IDH1,PSMD13,GPI,VIM,ACTG1,PRKCSH,PSMC3
HSA-5663205	Infectious disease	28	826	0.51	8.09e-06	9606.ENSP00000157812,9606.ENSP00000216727,9606.ENSP00000234590,9606.ENSP00000237530,9606.ENSP00000278412,9606.ENSP00000296930,9606.ENSP00000302486,9606.ENSP00000307940,9606.ENSP00000310129,9606.ENSP00000318697,9606.ENSP00000320866,9606.ENSP00000335153,9606.ENSP00000340466,9606.ENSP00000346067,9606.ENSP00000348442,9606.ENSP00000351777,9606.ENSP00000355759,9606.ENSP00000356790,9606.ENSP00000360609,…	PSMC4,PABPN1,ENO1,RPN2,SSRP1,NPM1,MAP2K1,EEF2,PSMD2,TUBB6,CALR,HSP90AA1,GANAB,RPSA,PSMD12,VCP,PARP1,ATP1B1,HSP90AB1,PGK1,HNRNPK,RBBP7,SEC13,PSMD13,ATP1A1,ACTG1,PRKCSH,PSMC3
HSA-390466	Chaperonin-mediated protein folding	10	94	1	1.33e-05	9606.ENSP00000217244,9606.ENSP00000258091,9606.ENSP00000275603,9606.ENSP00000280326,9606.ENSP00000286788,9606.ENSP00000295688,9606.ENSP00000299300,9606.ENSP00000317334,9606.ENSP00000318697,9606.ENSP00000377958	CSNK2A1,CCT7,CCT6A,CCT5,CCT8,CCT3,CCT2,TCP1,TUBB6,CCT4
HSA-6798695	Neutrophil degranulation	20	473	0.6	2.2e-05	9606.ENSP00000286788,9606.ENSP00000299300,9606.ENSP00000302886,9606.ENSP00000307940,9606.ENSP00000310129,9606.ENSP00000320171,9606.ENSP00000335153,9606.ENSP00000346032,9606.ENSP00000348442,9606.ENSP00000349446,9606.ENSP00000351777,9606.ENSP00000355011,9606.ENSP00000357722,9606.ENSP00000360609,9606.ENSP00000369538,9606.ENSP00000378669,9606.ENSP00000390265,9606.ENSP00000396937,9606.ENSP00000405573,…	CCT8,CCT2,PA2G4,EEF2,PSMD2,PKM,HSP90AA1,ANXA2,PSMD12,ARG1,VCP,ILF2,S100A8,HSP90AB1,GDI2,ALDOA,IDH1,PSMD13,GPI,PSMC3
HSA-5620922	BBSome-mediated cargo-targeting to cilium	6	22	1.41	3.21e-05	9606.ENSP00000280326,9606.ENSP00000286788,9606.ENSP00000295688,9606.ENSP00000299300,9606.ENSP00000317334,9606.ENSP00000377958	CCT5,CCT8,CCT3,CCT2,TCP1,CCT4
HSA-168249	Innate Immune System	30	1025	0.44	4.58e-05	9606.ENSP00000157812,9606.ENSP00000286788,9606.ENSP00000299300,9606.ENSP00000299767,9606.ENSP00000302486,9606.ENSP00000302886,9606.ENSP00000307940,9606.ENSP00000310129,9606.ENSP00000320171,9606.ENSP00000324804,9606.ENSP00000326804,9606.ENSP00000335153,9606.ENSP00000346032,9606.ENSP00000348442,9606.ENSP00000349446,9606.ENSP00000351777,9606.ENSP00000352438,9606.ENSP00000355011,9606.ENSP00000357722,…	PSMC4,CCT8,CCT2,HSP90B1,MAP2K1,PA2G4,EEF2,PSMD2,PKM,PPP2R1A,CUL1,HSP90AA1,ANXA2,PSMD12,ARG1,VCP,PCBP2,ILF2,S100A8,HSP90AB1,RPS6KA3,GDI2,ALDOA,PLD3,IDH1,PSMD13,GPI,ACTG1,PRKCSH,PSMC3
HSA-3371511	HSF1 activation	5	12	1.6	5.26e-05	9606.ENSP00000254719,9606.ENSP00000335153,9606.ENSP00000351777,9606.ENSP00000360609,9606.ENSP00000363017	RPA1,HSP90AA1,VCP,HSP90AB1,RPA2
HSA-3371556	Cellular response to heat stress	9	89	0.98	6.66e-05	9606.ENSP00000216218,9606.ENSP00000254719,9606.ENSP00000324173,9606.ENSP00000335153,9606.ENSP00000339740,9606.ENSP00000351777,9606.ENSP00000360609,9606.ENSP00000363017,9606.ENSP00000373312	ST13,RPA1,HSPA5,HSP90AA1,CAMK2D,VCP,HSP90AB1,RPA2,SEC13
HSA-449147	Signaling by Interleukins	18	440	0.59	0.00012	9606.ENSP00000157812,9606.ENSP00000299767,9606.ENSP00000302486,9606.ENSP00000310129,9606.ENSP00000317334,9606.ENSP00000321259,9606.ENSP00000324804,9606.ENSP00000326804,9606.ENSP00000327801,9606.ENSP00000335153,9606.ENSP00000346032,9606.ENSP00000346694,9606.ENSP00000348442,9606.ENSP00000354394,9606.ENSP00000368884,9606.ENSP00000396937,9606.ENSP00000446007,9606.ENSP00000481029	PSMC4,HSP90B1,MAP2K1,PSMD2,TCP1,TALDO1,PPP2R1A,CUL1,P4HB,HSP90AA1,ANXA2,HNRNPA2B1,PSMD12,STAT1,RPS6KA3,PSMD13,VIM,PSMC3
HSA-1640170	Cell Cycle	22	647	0.51	0.00014	9606.ENSP00000157812,9606.ENSP00000217244,9606.ENSP00000254719,9606.ENSP00000296930,9606.ENSP00000307288,9606.ENSP00000310129,9606.ENSP00000318697,9606.ENSP00000319664,9606.ENSP00000324804,9606.ENSP00000326804,9606.ENSP00000335153,9606.ENSP00000336712,9606.ENSP00000347232,9606.ENSP00000348442,9606.ENSP00000360609,9606.ENSP00000363017,9606.ENSP00000369424,9606.ENSP00000373312,9606.ENSP00000396937,…	PSMC4,CSNK2A1,RPA1,NPM1,MCM7,PSMD2,TUBB6,NUDC,PPP2R1A,CUL1,HSP90AA1,TNPO1,BLM,PSMD12,HSP90AB1,RPA2,RBBP7,SEC13,PSMD13,TOP3A,RUVBL2,PSMC3
HSA-2262752	Cellular responses to stress	20	544	0.54	0.00014	9606.ENSP00000157812,9606.ENSP00000216218,9606.ENSP00000221130,9606.ENSP00000254719,9606.ENSP00000310129,9606.ENSP00000318697,9606.ENSP00000324173,9606.ENSP00000327801,9606.ENSP00000335153,9606.ENSP00000339740,9606.ENSP00000346067,9606.ENSP00000348442,9606.ENSP00000351777,9606.ENSP00000360609,9606.ENSP00000363017,9606.ENSP00000368884,9606.ENSP00000369424,9606.ENSP00000373312,9606.ENSP00000396937,…	PSMC4,ST13,GSR,RPA1,PSMD2,TUBB6,HSPA5,P4HB,HSP90AA1,CAMK2D,RPSA,PSMD12,VCP,HSP90AB1,RPA2,RPS6KA3,RBBP7,SEC13,PSMD13,PSMC3
HSA-69206	G1/S Transition	10	129	0.87	0.00014	9606.ENSP00000157812,9606.ENSP00000254719,9606.ENSP00000307288,9606.ENSP00000310129,9606.ENSP00000324804,9606.ENSP00000326804,9606.ENSP00000348442,9606.ENSP00000363017,9606.ENSP00000396937,9606.ENSP00000481029	PSMC4,RPA1,MCM7,PSMD2,PPP2R1A,CUL1,PSMD12,RPA2,PSMD13,PSMC3
HSA-8852276	The role of GTSE1 in G2/M progression after G2 checkpoint	8	75	1.01	0.00016	9606.ENSP00000157812,9606.ENSP00000310129,9606.ENSP00000318697,9606.ENSP00000335153,9606.ENSP00000348442,9606.ENSP00000360609,9606.ENSP00000396937,9606.ENSP00000481029	PSMC4,PSMD2,TUBB6,HSP90AA1,PSMD12,HSP90AB1,PSMD13,PSMC3
HSA-72766	Translation	14	289	0.66	0.00024	9606.ENSP00000237530,9606.ENSP00000256854,9606.ENSP00000261772,9606.ENSP00000264161,9606.ENSP00000293831,9606.ENSP00000307940,9606.ENSP00000322439,9606.ENSP00000331901,9606.ENSP00000346067,9606.ENSP00000362688,9606.ENSP00000369897,9606.ENSP00000387710,9606.ENSP00000398131,9606.ENSP00000410059	RPN2,NARS,AARS,DARS,EIF4A1,EEF2,TUFM,EEF1G,RPSA,EIF3I,CARS,TARS,GSPT1,EEF1D
HSA-69002	DNA Replication Pre-Initiation	8	83	0.96	0.0003	9606.ENSP00000157812,9606.ENSP00000254719,9606.ENSP00000307288,9606.ENSP00000310129,9606.ENSP00000348442,9606.ENSP00000363017,9606.ENSP00000396937,9606.ENSP00000481029	PSMC4,RPA1,MCM7,PSMD2,PSMD12,RPA2,PSMD13,PSMC3
HSA-5678895	Defective CFTR causes cystic fibrosis	7	59	1.05	0.00033	9606.ENSP00000157812,9606.ENSP00000276461,9606.ENSP00000310129,9606.ENSP00000348442,9606.ENSP00000351777,9606.ENSP00000396937,9606.ENSP00000481029	PSMC4,ERLIN2,PSMD2,PSMD12,VCP,PSMD13,PSMC3
HSA-69239	Synthesis of DNA	9	116	0.87	0.00036	9606.ENSP00000157812,9606.ENSP00000254719,9606.ENSP00000307288,9606.ENSP00000310129,9606.ENSP00000326804,9606.ENSP00000348442,9606.ENSP00000363017,9606.ENSP00000396937,9606.ENSP00000481029	PSMC4,RPA1,MCM7,PSMD2,CUL1,PSMD12,RPA2,PSMD13,PSMC3
HSA-69481	G2/M Checkpoints	10	149	0.8	0.00036	9606.ENSP00000157812,9606.ENSP00000254719,9606.ENSP00000307288,9606.ENSP00000310129,9606.ENSP00000347232,9606.ENSP00000348442,9606.ENSP00000363017,9606.ENSP00000396937,9606.ENSP00000442336,9606.ENSP00000481029	PSMC4,RPA1,MCM7,PSMD2,BLM,PSMD12,RPA2,PSMD13,TOP3A,PSMC3
HSA-5358346	Hedgehog ligand biogenesis	7	63	1.02	0.00044	9606.ENSP00000157812,9606.ENSP00000310129,9606.ENSP00000327801,9606.ENSP00000348442,9606.ENSP00000351777,9606.ENSP00000396937,9606.ENSP00000481029	PSMC4,PSMD2,P4HB,PSMD12,VCP,PSMD13,PSMC3
HSA-69620	Cell Cycle Checkpoints	13	269	0.66	0.00045	9606.ENSP00000157812,9606.ENSP00000254719,9606.ENSP00000307288,9606.ENSP00000310129,9606.ENSP00000319664,9606.ENSP00000324804,9606.ENSP00000347232,9606.ENSP00000348442,9606.ENSP00000363017,9606.ENSP00000373312,9606.ENSP00000396937,9606.ENSP00000442336,9606.ENSP00000481029	PSMC4,RPA1,MCM7,PSMD2,NUDC,PPP2R1A,BLM,PSMD12,RPA2,SEC13,PSMD13,TOP3A,PSMC3
HSA-379716	Cytosolic tRNA aminoacylation	5	24	1.3	0.00056	9606.ENSP00000256854,9606.ENSP00000261772,9606.ENSP00000264161,9606.ENSP00000369897,9606.ENSP00000387710	NARS,AARS,DARS,CARS,TARS
HSA-5617833	Cilium Assembly	11	197	0.72	0.00059	9606.ENSP00000280326,9606.ENSP00000286788,9606.ENSP00000295688,9606.ENSP00000299300,9606.ENSP00000317334,9606.ENSP00000318697,9606.ENSP00000324804,9606.ENSP00000335153,9606.ENSP00000336712,9606.ENSP00000377958,9606.ENSP00000479861	CCT5,CCT8,CCT3,CCT2,TCP1,TUBB6,PPP2R1A,HSP90AA1,TNPO1,CCT4,SEPT2
HSA-983170	Antigen Presentation: Folding, assembly and peptide loading of class I MHC	5	25	1.28	0.00064	9606.ENSP00000300289,9606.ENSP00000306881,9606.ENSP00000320866,9606.ENSP00000324173,9606.ENSP00000373312	PDIA3,SEC23A,CALR,HSPA5,SEC13
HSA-68949	Orc1 removal from chromatin	7	69	0.98	0.00066	9606.ENSP00000157812,9606.ENSP00000307288,9606.ENSP00000310129,9606.ENSP00000326804,9606.ENSP00000348442,9606.ENSP00000396937,9606.ENSP00000481029	PSMC4,MCM7,PSMD2,CUL1,PSMD12,PSMD13,PSMC3
HSA-1280215	Cytokine Signaling in Immune system	21	681	0.47	0.00068	9606.ENSP00000157812,9606.ENSP00000293831,9606.ENSP00000299767,9606.ENSP00000302486,9606.ENSP00000310129,9606.ENSP00000317334,9606.ENSP00000321259,9606.ENSP00000324804,9606.ENSP00000326804,9606.ENSP00000327801,9606.ENSP00000335153,9606.ENSP00000339740,9606.ENSP00000346032,9606.ENSP00000346694,9606.ENSP00000348442,9606.ENSP00000354394,9606.ENSP00000368884,9606.ENSP00000373312,9606.ENSP00000396937,…	PSMC4,EIF4A1,HSP90B1,MAP2K1,PSMD2,TCP1,TALDO1,PPP2R1A,CUL1,P4HB,HSP90AA1,CAMK2D,ANXA2,HNRNPA2B1,PSMD12,STAT1,RPS6KA3,SEC13,PSMD13,VIM,PSMC3
HSA-8939902	Regulation of RUNX2 expression and activity	7	71	0.97	0.00075	9606.ENSP00000157812,9606.ENSP00000310129,9606.ENSP00000326804,9606.ENSP00000348442,9606.ENSP00000354394,9606.ENSP00000396937,9606.ENSP00000481029	PSMC4,PSMD2,CUL1,PSMD12,STAT1,PSMD13,PSMC3
HSA-9604323	Negative regulation of NOTCH4 signaling	6	52	1.04	0.0013	9606.ENSP00000157812,9606.ENSP00000310129,9606.ENSP00000326804,9606.ENSP00000348442,9606.ENSP00000396937,9606.ENSP00000481029	PSMC4,PSMD2,CUL1,PSMD12,PSMD13,PSMC3
HSA-1236974	ER-Phagosome pathway	7	81	0.91	0.0014	9606.ENSP00000157812,9606.ENSP00000300289,9606.ENSP00000310129,9606.ENSP00000320866,9606.ENSP00000348442,9606.ENSP00000396937,9606.ENSP00000481029	PSMC4,PDIA3,PSMD2,CALR,PSMD12,PSMD13,PSMC3
HSA-174113	SCF-beta-TrCP mediated degradation of Emi1	6	53	1.03	0.0014	9606.ENSP00000157812,9606.ENSP00000310129,9606.ENSP00000326804,9606.ENSP00000348442,9606.ENSP00000396937,9606.ENSP00000481029	PSMC4,PSMD2,CUL1,PSMD12,PSMD13,PSMC3
HSA-195253	Degradation of beta-catenin by the destruction complex	7	81	0.91	0.0014	9606.ENSP00000157812,9606.ENSP00000310129,9606.ENSP00000324804,9606.ENSP00000326804,9606.ENSP00000348442,9606.ENSP00000396937,9606.ENSP00000481029	PSMC4,PSMD2,PPP2R1A,CUL1,PSMD12,PSMD13,PSMC3
HSA-5358351	Signaling by Hedgehog	9	146	0.77	0.0014	9606.ENSP00000157812,9606.ENSP00000310129,9606.ENSP00000318697,9606.ENSP00000326804,9606.ENSP00000327801,9606.ENSP00000348442,9606.ENSP00000351777,9606.ENSP00000396937,9606.ENSP00000481029	PSMC4,PSMD2,TUBB6,CUL1,P4HB,PSMD12,VCP,PSMD13,PSMC3
HSA-5362768	Hh mutants are degraded by ERAD	6	54	1.02	0.0014	9606.ENSP00000157812,9606.ENSP00000310129,9606.ENSP00000348442,9606.ENSP00000351777,9606.ENSP00000396937,9606.ENSP00000481029	PSMC4,PSMD2,PSMD12,VCP,PSMD13,PSMC3
HSA-8854050	FBXL7 down-regulates AURKA during mitotic entry and in early mitosis	6	53	1.03	0.0014	9606.ENSP00000157812,9606.ENSP00000310129,9606.ENSP00000326804,9606.ENSP00000348442,9606.ENSP00000396937,9606.ENSP00000481029	PSMC4,PSMD2,CUL1,PSMD12,PSMD13,PSMC3
HSA-9679506	SARS-CoV Infections	9	145	0.77	0.0014	9606.ENSP00000237530,9606.ENSP00000335153,9606.ENSP00000340466,9606.ENSP00000351777,9606.ENSP00000356790,9606.ENSP00000360609,9606.ENSP00000369424,9606.ENSP00000445306,9606.ENSP00000466134	RPN2,HSP90AA1,GANAB,VCP,ATP1B1,HSP90AB1,RBBP7,ATP1A1,PRKCSH
HSA-447115	Interleukin-12 family signaling	6	56	1.01	0.0016	9606.ENSP00000317334,9606.ENSP00000321259,9606.ENSP00000327801,9606.ENSP00000346032,9606.ENSP00000346694,9606.ENSP00000354394	TCP1,TALDO1,P4HB,ANXA2,HNRNPA2B1,STAT1
HSA-450531	Regulation of mRNA stability by proteins that bind AU-rich elements	7	85	0.89	0.0017	9606.ENSP00000157812,9606.ENSP00000310129,9606.ENSP00000336712,9606.ENSP00000348442,9606.ENSP00000381216,9606.ENSP00000396937,9606.ENSP00000481029	PSMC4,PSMD2,TNPO1,PSMD12,KHSRP,PSMD13,PSMC3
HSA-5676590	NIK-->noncanonical NF-kB signaling	6	57	1	0.0017	9606.ENSP00000157812,9606.ENSP00000310129,9606.ENSP00000326804,9606.ENSP00000348442,9606.ENSP00000396937,9606.ENSP00000481029	PSMC4,PSMD2,CUL1,PSMD12,PSMD13,PSMC3
HSA-69278	Cell Cycle, Mitotic	17	518	0.49	0.0017	9606.ENSP00000157812,9606.ENSP00000217244,9606.ENSP00000254719,9606.ENSP00000307288,9606.ENSP00000310129,9606.ENSP00000318697,9606.ENSP00000319664,9606.ENSP00000324804,9606.ENSP00000326804,9606.ENSP00000335153,9606.ENSP00000336712,9606.ENSP00000348442,9606.ENSP00000360609,9606.ENSP00000363017,9606.ENSP00000373312,9606.ENSP00000396937,9606.ENSP00000481029	PSMC4,CSNK2A1,RPA1,MCM7,PSMD2,TUBB6,NUDC,PPP2R1A,CUL1,HSP90AA1,TNPO1,PSMD12,HSP90AB1,RPA2,SEC13,PSMD13,PSMC3
HSA-983169	Class I MHC mediated antigen processing & presentation	14	366	0.56	0.0017	9606.ENSP00000157812,9606.ENSP00000261714,9606.ENSP00000300289,9606.ENSP00000306881,9606.ENSP00000310129,9606.ENSP00000320866,9606.ENSP00000324173,9606.ENSP00000326804,9606.ENSP00000348442,9606.ENSP00000358283,9606.ENSP00000373272,9606.ENSP00000373312,9606.ENSP00000396937,9606.ENSP00000481029	PSMC4,BLMH,PDIA3,SEC23A,PSMD2,CALR,HSPA5,CUL1,PSMD12,UFL1,TRIM71,SEC13,PSMD13,PSMC3
HSA-187577	SCF(Skp2)-mediated degradation of p27/p21	6	58	0.99	0.0018	9606.ENSP00000157812,9606.ENSP00000310129,9606.ENSP00000326804,9606.ENSP00000348442,9606.ENSP00000396937,9606.ENSP00000481029	PSMC4,PSMD2,CUL1,PSMD12,PSMD13,PSMC3
HSA-532668	N-glycan trimming in the ER and Calnexin/Calreticulin cycle	5	35	1.13	0.0018	9606.ENSP00000300289,9606.ENSP00000320866,9606.ENSP00000340466,9606.ENSP00000351777,9606.ENSP00000466134	PDIA3,CALR,GANAB,VCP,PRKCSH
HSA-5607761	Dectin-1 mediated noncanonical NF-kB signaling	6	58	0.99	0.0018	9606.ENSP00000157812,9606.ENSP00000310129,9606.ENSP00000326804,9606.ENSP00000348442,9606.ENSP00000396937,9606.ENSP00000481029	PSMC4,PSMD2,CUL1,PSMD12,PSMD13,PSMC3
HSA-5610780	Degradation of GLI1 by the proteasome	6	58	0.99	0.0018	9606.ENSP00000157812,9606.ENSP00000310129,9606.ENSP00000326804,9606.ENSP00000348442,9606.ENSP00000396937,9606.ENSP00000481029	PSMC4,PSMD2,CUL1,PSMD12,PSMD13,PSMC3
HSA-5610783	Degradation of GLI2 by the proteasome	6	58	0.99	0.0018	9606.ENSP00000157812,9606.ENSP00000310129,9606.ENSP00000326804,9606.ENSP00000348442,9606.ENSP00000396937,9606.ENSP00000481029	PSMC4,PSMD2,CUL1,PSMD12,PSMD13,PSMC3
HSA-5610785	GLI3 is processed to GLI3R by the proteasome	6	58	0.99	0.0018	9606.ENSP00000157812,9606.ENSP00000310129,9606.ENSP00000326804,9606.ENSP00000348442,9606.ENSP00000396937,9606.ENSP00000481029	PSMC4,PSMD2,CUL1,PSMD12,PSMD13,PSMC3
HSA-69275	G2/M Transition	10	193	0.69	0.0018	9606.ENSP00000157812,9606.ENSP00000310129,9606.ENSP00000318697,9606.ENSP00000324804,9606.ENSP00000326804,9606.ENSP00000335153,9606.ENSP00000348442,9606.ENSP00000360609,9606.ENSP00000396937,9606.ENSP00000481029	PSMC4,PSMD2,TUBB6,PPP2R1A,CUL1,HSP90AA1,PSMD12,HSP90AB1,PSMD13,PSMC3
HSA-8878166	Transcriptional regulation by RUNX2	8	118	0.81	0.0018	9606.ENSP00000157812,9606.ENSP00000310129,9606.ENSP00000311747,9606.ENSP00000326804,9606.ENSP00000348442,9606.ENSP00000354394,9606.ENSP00000396937,9606.ENSP00000481029	PSMC4,PSMD2,RBM14,CUL1,PSMD12,STAT1,PSMD13,PSMC3
HSA-597592	Post-translational protein modification	31	1390	0.33	0.002	9606.ENSP00000054950,9606.ENSP00000157812,9606.ENSP00000237530,9606.ENSP00000254719,9606.ENSP00000261601,9606.ENSP00000295897,9606.ENSP00000296930,9606.ENSP00000299767,9606.ENSP00000300289,9606.ENSP00000306881,9606.ENSP00000307940,9606.ENSP00000310129,9606.ENSP00000318697,9606.ENSP00000320866,9606.ENSP00000326804,9606.ENSP00000327801,9606.ENSP00000340466,9606.ENSP00000347232,9606.ENSP00000348442,…	RCN1,PSMC4,RPN2,RPA1,USP14,ALB,NPM1,HSP90B1,PDIA3,SEC23A,EEF2,PSMD2,TUBB6,CALR,CUL1,P4HB,GANAB,BLM,PSMD12,GMPPA,VCP,PARP1,HNRNPK,RBBP7,SEC13,DDX17,PDIA6,PSMD13,HNRNPC,PRKCSH,PSMC3
HSA-5336415	Uptake and function of diphtheria toxin	3	6	1.68	0.0025	9606.ENSP00000307940,9606.ENSP00000335153,9606.ENSP00000360609	EEF2,HSP90AA1,HSP90AB1
HSA-1169091	Activation of NF-kappaB in B cells	6	65	0.94	0.0027	9606.ENSP00000157812,9606.ENSP00000310129,9606.ENSP00000326804,9606.ENSP00000348442,9606.ENSP00000396937,9606.ENSP00000481029	PSMC4,PSMD2,CUL1,PSMD12,PSMD13,PSMC3
HSA-5663202	Diseases of signal transduction by growth factor receptors and second messengers	14	392	0.53	0.0027	9606.ENSP00000157812,9606.ENSP00000276461,9606.ENSP00000302486,9606.ENSP00000310129,9606.ENSP00000324804,9606.ENSP00000326804,9606.ENSP00000335153,9606.ENSP00000339740,9606.ENSP00000348442,9606.ENSP00000351777,9606.ENSP00000354394,9606.ENSP00000396937,9606.ENSP00000458162,9606.ENSP00000481029	PSMC4,ERLIN2,MAP2K1,PSMD2,PPP2R1A,CUL1,HSP90AA1,CAMK2D,PSMD12,VCP,STAT1,PSMD13,ACTG1,PSMC3
HSA-68867	Assembly of the pre-replicative complex	6	66	0.94	0.0028	9606.ENSP00000157812,9606.ENSP00000307288,9606.ENSP00000310129,9606.ENSP00000348442,9606.ENSP00000396937,9606.ENSP00000481029	PSMC4,MCM7,PSMD2,PSMD12,PSMD13,PSMC3
HSA-8948751	Regulation of PTEN stability and activity	6	67	0.93	0.003	9606.ENSP00000157812,9606.ENSP00000217244,9606.ENSP00000310129,9606.ENSP00000348442,9606.ENSP00000396937,9606.ENSP00000481029	PSMC4,CSNK2A1,PSMD2,PSMD12,PSMD13,PSMC3
HSA-3371599	Defective HLCS causes multiple carboxylase deficiency	3	7	1.61	0.0032	9606.ENSP00000265594,9606.ENSP00000343657,9606.ENSP00000377532	MCCC1,MCCC2,PC
HSA-9020702	Interleukin-1 signaling	7	99	0.83	0.0032	9606.ENSP00000157812,9606.ENSP00000302486,9606.ENSP00000310129,9606.ENSP00000326804,9606.ENSP00000348442,9606.ENSP00000396937,9606.ENSP00000481029	PSMC4,MAP2K1,PSMD2,CUL1,PSMD12,PSMD13,PSMC3
HSA-5619115	Disorders of transmembrane transporters	9	174	0.69	0.0033	9606.ENSP00000157812,9606.ENSP00000276461,9606.ENSP00000310129,9606.ENSP00000348442,9606.ENSP00000351777,9606.ENSP00000367123,9606.ENSP00000373312,9606.ENSP00000396937,9606.ENSP00000481029	PSMC4,ERLIN2,PSMD2,PSMD12,VCP,SLC3A2,SEC13,PSMD13,PSMC3
HSA-382556	ABC-family proteins mediated transport	7	101	0.82	0.0034	9606.ENSP00000157812,9606.ENSP00000276461,9606.ENSP00000310129,9606.ENSP00000348442,9606.ENSP00000351777,9606.ENSP00000396937,9606.ENSP00000481029	PSMC4,ERLIN2,PSMD2,PSMD12,VCP,PSMD13,PSMC3
HSA-71403	Citric acid cycle (TCA cycle)	4	22	1.24	0.0035	9606.ENSP00000216254,9606.ENSP00000327070,9606.ENSP00000331897,9606.ENSP00000335304	ACO2,MDH2,IDH2,DLST
HSA-9613829	Chaperone Mediated Autophagy	4	22	1.24	0.0035	9606.ENSP00000221957,9606.ENSP00000335153,9606.ENSP00000360609,9606.ENSP00000446007	PLIN3,HSP90AA1,HSP90AB1,VIM
HSA-9675108	Nervous system development	17	572	0.45	0.0037	9606.ENSP00000003100,9606.ENSP00000157812,9606.ENSP00000217244,9606.ENSP00000302486,9606.ENSP00000310129,9606.ENSP00000318697,9606.ENSP00000335153,9606.ENSP00000346067,9606.ENSP00000348442,9606.ENSP00000356042,9606.ENSP00000360609,9606.ENSP00000368884,9606.ENSP00000384136,9606.ENSP00000396937,9606.ENSP00000398131,9606.ENSP00000458162,9606.ENSP00000481029	CYP51A1,PSMC4,CSNK2A1,MAP2K1,PSMD2,TUBB6,HSP90AA1,RPSA,PSMD12,EZR,HSP90AB1,RPS6KA3,RDX,PSMD13,GSPT1,ACTG1,PSMC3
HSA-9020591	Interleukin-12 signaling	5	46	1.01	0.0043	9606.ENSP00000317334,9606.ENSP00000321259,9606.ENSP00000327801,9606.ENSP00000346032,9606.ENSP00000346694	TCP1,TALDO1,P4HB,ANXA2,HNRNPA2B1
HSA-2467813	Separation of Sister Chromatids	9	184	0.67	0.0046	9606.ENSP00000157812,9606.ENSP00000310129,9606.ENSP00000318697,9606.ENSP00000319664,9606.ENSP00000324804,9606.ENSP00000348442,9606.ENSP00000373312,9606.ENSP00000396937,9606.ENSP00000481029	PSMC4,PSMD2,TUBB6,NUDC,PPP2R1A,PSMD12,SEC13,PSMD13,PSMC3
HSA-437239	Recycling pathway of L1	5	47	1	0.0046	9606.ENSP00000318697,9606.ENSP00000356042,9606.ENSP00000368884,9606.ENSP00000384136,9606.ENSP00000458162	TUBB6,EZR,RPS6KA3,RDX,ACTG1
HSA-68882	Mitotic Anaphase	10	227	0.62	0.0046	9606.ENSP00000157812,9606.ENSP00000310129,9606.ENSP00000318697,9606.ENSP00000319664,9606.ENSP00000324804,9606.ENSP00000336712,9606.ENSP00000348442,9606.ENSP00000373312,9606.ENSP00000396937,9606.ENSP00000481029	PSMC4,PSMD2,TUBB6,NUDC,PPP2R1A,TNPO1,PSMD12,SEC13,PSMD13,PSMC3
HSA-110373	Resolution of AP sites via the multiple-nucleotide patch replacement pathway	4	25	1.18	0.0049	9606.ENSP00000216714,9606.ENSP00000254719,9606.ENSP00000355759,9606.ENSP00000363017	APEX1,RPA1,PARP1,RPA2
HSA-1236978	Cross-presentation of soluble exogenous antigens (endosomes)	5	48	1	0.0049	9606.ENSP00000157812,9606.ENSP00000310129,9606.ENSP00000348442,9606.ENSP00000396937,9606.ENSP00000481029	PSMC4,PSMD2,PSMD12,PSMD13,PSMC3
HSA-211733	Regulation of activated PAK-2p34 by proteasome mediated degradation	5	48	1	0.0049	9606.ENSP00000157812,9606.ENSP00000310129,9606.ENSP00000348442,9606.ENSP00000396937,9606.ENSP00000481029	PSMC4,PSMD2,PSMD12,PSMD13,PSMC3
HSA-5610787	Hedgehog off state	7	110	0.78	0.0049	9606.ENSP00000157812,9606.ENSP00000310129,9606.ENSP00000318697,9606.ENSP00000326804,9606.ENSP00000348442,9606.ENSP00000396937,9606.ENSP00000481029	PSMC4,PSMD2,TUBB6,CUL1,PSMD12,PSMD13,PSMC3
HSA-350562	Regulation of ornithine decarboxylase (ODC)	5	49	0.99	0.0052	9606.ENSP00000157812,9606.ENSP00000310129,9606.ENSP00000348442,9606.ENSP00000396937,9606.ENSP00000481029	PSMC4,PSMD2,PSMD12,PSMD13,PSMC3
HSA-6803529	FGFR2 alternative splicing	4	26	1.16	0.0053	9606.ENSP00000325376,9606.ENSP00000341826,9606.ENSP00000349168,9606.ENSP00000358089	HNRNPM,HNRNPA1,HNRNPH1,TIAL1
HSA-901042	Calnexin/calreticulin cycle	4	26	1.16	0.0053	9606.ENSP00000300289,9606.ENSP00000320866,9606.ENSP00000340466,9606.ENSP00000466134	PDIA3,CALR,GANAB,PRKCSH
HSA-180534	Vpu mediated degradation of CD4	5	50	0.98	0.0054	9606.ENSP00000157812,9606.ENSP00000310129,9606.ENSP00000348442,9606.ENSP00000396937,9606.ENSP00000481029	PSMC4,PSMD2,PSMD12,PSMD13,PSMC3
HSA-2871837	FCERI mediated NF-kB activation	6	80	0.85	0.0054	9606.ENSP00000157812,9606.ENSP00000310129,9606.ENSP00000326804,9606.ENSP00000348442,9606.ENSP00000396937,9606.ENSP00000481029	PSMC4,PSMD2,CUL1,PSMD12,PSMD13,PSMC3
HSA-349425	Autodegradation of the E3 ubiquitin ligase COP1	5	50	0.98	0.0054	9606.ENSP00000157812,9606.ENSP00000310129,9606.ENSP00000348442,9606.ENSP00000396937,9606.ENSP00000481029	PSMC4,PSMD2,PSMD12,PSMD13,PSMC3
HSA-381183	ATF6 (ATF6-alpha) activates chaperone genes	3	10	1.45	0.0054	9606.ENSP00000299767,9606.ENSP00000320866,9606.ENSP00000324173	HSP90B1,CALR,HSPA5
HSA-422475	Axon guidance	16	547	0.44	0.0054	9606.ENSP00000157812,9606.ENSP00000217244,9606.ENSP00000302486,9606.ENSP00000310129,9606.ENSP00000318697,9606.ENSP00000335153,9606.ENSP00000346067,9606.ENSP00000348442,9606.ENSP00000356042,9606.ENSP00000360609,9606.ENSP00000368884,9606.ENSP00000384136,9606.ENSP00000396937,9606.ENSP00000398131,9606.ENSP00000458162,9606.ENSP00000481029	PSMC4,CSNK2A1,MAP2K1,PSMD2,TUBB6,HSP90AA1,RPSA,PSMD12,EZR,HSP90AB1,RPS6KA3,RDX,PSMD13,GSPT1,ACTG1,PSMC3
HSA-69601	Ubiquitin Mediated Degradation of Phosphorylated Cdc25A	5	50	0.98	0.0054	9606.ENSP00000157812,9606.ENSP00000310129,9606.ENSP00000348442,9606.ENSP00000396937,9606.ENSP00000481029	PSMC4,PSMD2,PSMD12,PSMD13,PSMC3
HSA-75815	Ubiquitin-dependent degradation of Cyclin D	5	50	0.98	0.0054	9606.ENSP00000157812,9606.ENSP00000310129,9606.ENSP00000348442,9606.ENSP00000396937,9606.ENSP00000481029	PSMC4,PSMD2,PSMD12,PSMD13,PSMC3
HSA-9663891	Selective autophagy	6	80	0.85	0.0054	9606.ENSP00000217244,9606.ENSP00000221957,9606.ENSP00000318697,9606.ENSP00000335153,9606.ENSP00000351777,9606.ENSP00000446007	CSNK2A1,PLIN3,TUBB6,HSP90AA1,VCP,VIM
HSA-180585	Vif-mediated degradation of APOBEC3G	5	52	0.96	0.0057	9606.ENSP00000157812,9606.ENSP00000310129,9606.ENSP00000348442,9606.ENSP00000396937,9606.ENSP00000481029	PSMC4,PSMD2,PSMD12,PSMD13,PSMC3
HSA-8941858	Regulation of RUNX3 expression and activity	5	52	0.96	0.0057	9606.ENSP00000157812,9606.ENSP00000310129,9606.ENSP00000348442,9606.ENSP00000396937,9606.ENSP00000481029	PSMC4,PSMD2,PSMD12,PSMD13,PSMC3
HSA-450408	AUF1 (hnRNP D0) binds and destabilizes mRNA	5	53	0.95	0.006	9606.ENSP00000157812,9606.ENSP00000310129,9606.ENSP00000348442,9606.ENSP00000396937,9606.ENSP00000481029	PSMC4,PSMD2,PSMD12,PSMD13,PSMC3
HSA-4641257	Degradation of AXIN	5	53	0.95	0.006	9606.ENSP00000157812,9606.ENSP00000310129,9606.ENSP00000348442,9606.ENSP00000396937,9606.ENSP00000481029	PSMC4,PSMD2,PSMD12,PSMD13,PSMC3
HSA-373760	L1CAM interactions	7	119	0.75	0.0062	9606.ENSP00000217244,9606.ENSP00000302486,9606.ENSP00000318697,9606.ENSP00000356042,9606.ENSP00000368884,9606.ENSP00000384136,9606.ENSP00000458162	CSNK2A1,MAP2K1,TUBB6,EZR,RPS6KA3,RDX,ACTG1
HSA-196780	Biotin transport and metabolism	3	11	1.41	0.0064	9606.ENSP00000265594,9606.ENSP00000343657,9606.ENSP00000377532	MCCC1,MCCC2,PC
HSA-5339562	Uptake and actions of bacterial toxins	4	29	1.12	0.0064	9606.ENSP00000302486,9606.ENSP00000307940,9606.ENSP00000335153,9606.ENSP00000360609	MAP2K1,EEF2,HSP90AA1,HSP90AB1
HSA-5633007	Regulation of TP53 Activity	8	159	0.68	0.0064	9606.ENSP00000217244,9606.ENSP00000254719,9606.ENSP00000278412,9606.ENSP00000324804,9606.ENSP00000347232,9606.ENSP00000363017,9606.ENSP00000369424,9606.ENSP00000442336	CSNK2A1,RPA1,SSRP1,PPP2R1A,BLM,RPA2,RBBP7,TOP3A
HSA-4641258	Degradation of DVL	5	55	0.94	0.0066	9606.ENSP00000157812,9606.ENSP00000310129,9606.ENSP00000348442,9606.ENSP00000396937,9606.ENSP00000481029	PSMC4,PSMD2,PSMD12,PSMD13,PSMC3
HSA-5687128	MAPK6/MAPK4 signaling	6	87	0.82	0.007	9606.ENSP00000157812,9606.ENSP00000290341,9606.ENSP00000310129,9606.ENSP00000348442,9606.ENSP00000396937,9606.ENSP00000481029	PSMC4,IGF2BP1,PSMD2,PSMD12,PSMD13,PSMC3
HSA-68827	CDT1 association with the CDC6:ORC:origin complex	5	57	0.92	0.0075	9606.ENSP00000157812,9606.ENSP00000310129,9606.ENSP00000348442,9606.ENSP00000396937,9606.ENSP00000481029	PSMC4,PSMD2,PSMD12,PSMD13,PSMC3
HSA-3108232	SUMO E3 ligases SUMOylate target proteins	8	166	0.66	0.0078	9606.ENSP00000254719,9606.ENSP00000296930,9606.ENSP00000347232,9606.ENSP00000355759,9606.ENSP00000365439,9606.ENSP00000373312,9606.ENSP00000380033,9606.ENSP00000451291	RPA1,NPM1,BLM,PARP1,HNRNPK,SEC13,DDX17,HNRNPC
HSA-202424	Downstream TCR signaling	6	91	0.8	0.0084	9606.ENSP00000157812,9606.ENSP00000310129,9606.ENSP00000326804,9606.ENSP00000348442,9606.ENSP00000396937,9606.ENSP00000481029	PSMC4,PSMD2,CUL1,PSMD12,PSMD13,PSMC3
HSA-162909	Host Interactions of HIV factors	7	129	0.71	0.0088	9606.ENSP00000157812,9606.ENSP00000296930,9606.ENSP00000310129,9606.ENSP00000348442,9606.ENSP00000373312,9606.ENSP00000396937,9606.ENSP00000481029	PSMC4,NPM1,PSMD2,PSMD12,SEC13,PSMD13,PSMC3
HSA-381119	Unfolded Protein Response (UPR)	6	92	0.79	0.0088	9606.ENSP00000299767,9606.ENSP00000320866,9606.ENSP00000324173,9606.ENSP00000357189,9606.ENSP00000381216,9606.ENSP00000385385	HSP90B1,CALR,HSPA5,HDGF,KHSRP,PDIA6
HSA-6804756	Regulation of TP53 Activity through Phosphorylation	6	92	0.79	0.0088	9606.ENSP00000217244,9606.ENSP00000254719,9606.ENSP00000278412,9606.ENSP00000347232,9606.ENSP00000363017,9606.ENSP00000442336	CSNK2A1,RPA1,SSRP1,BLM,RPA2,TOP3A
HSA-1592230	Mitochondrial biogenesis	6	93	0.79	0.0091	9606.ENSP00000262030,9606.ENSP00000327589,9606.ENSP00000331897,9606.ENSP00000381736,9606.ENSP00000387262,9606.ENSP00000419665	ATP5B,GLUD2,IDH2,ATP5A1,IMMT,SSBP1
HSA-174084	Autodegradation of Cdh1 by Cdh1:APC/C	5	61	0.89	0.0094	9606.ENSP00000157812,9606.ENSP00000310129,9606.ENSP00000348442,9606.ENSP00000396937,9606.ENSP00000481029	PSMC4,PSMD2,PSMD12,PSMD13,PSMC3
HSA-9636667	Manipulation of host energy metabolism	2	2	1.98	0.0096	9606.ENSP00000234590,9606.ENSP00000362413	ENO1,PGK1
HSA-4608870	Asymmetric localization of PCP proteins	5	62	0.88	0.0099	9606.ENSP00000157812,9606.ENSP00000310129,9606.ENSP00000348442,9606.ENSP00000396937,9606.ENSP00000481029	PSMC4,PSMD2,PSMD12,PSMD13,PSMC3
HSA-8964539	Glutamate and glutamine metabolism	3	14	1.31	0.0101	9606.ENSP00000245206,9606.ENSP00000327589,9606.ENSP00000360268	GOT2,GLUD2,ALDH18A1
HSA-1234176	Oxygen-dependent proline hydroxylation of Hypoxia-inducible Factor Alpha	5	63	0.88	0.0104	9606.ENSP00000157812,9606.ENSP00000310129,9606.ENSP00000348442,9606.ENSP00000396937,9606.ENSP00000481029	PSMC4,PSMD2,PSMD12,PSMD13,PSMC3
HSA-1268020	Mitochondrial protein import	5	64	0.87	0.0109	9606.ENSP00000216254,9606.ENSP00000262030,9606.ENSP00000270538,9606.ENSP00000373620,9606.ENSP00000381736	ACO2,ATP5B,TIMM44,HSPD1,ATP5A1
HSA-5685938	HDR through Single Strand Annealing (SSA)	4	36	1.02	0.0109	9606.ENSP00000254719,9606.ENSP00000347232,9606.ENSP00000363017,9606.ENSP00000442336	RPA1,BLM,RPA2,TOP3A
HSA-6807070	PTEN Regulation	7	137	0.69	0.011	9606.ENSP00000157812,9606.ENSP00000217244,9606.ENSP00000310129,9606.ENSP00000348442,9606.ENSP00000369424,9606.ENSP00000396937,9606.ENSP00000481029	PSMC4,CSNK2A1,PSMD2,PSMD12,RBBP7,PSMD13,PSMC3
HSA-68886	M Phase	12	376	0.48	0.0111	9606.ENSP00000157812,9606.ENSP00000217244,9606.ENSP00000310129,9606.ENSP00000318697,9606.ENSP00000319664,9606.ENSP00000324804,9606.ENSP00000335153,9606.ENSP00000336712,9606.ENSP00000348442,9606.ENSP00000373312,9606.ENSP00000396937,9606.ENSP00000481029	PSMC4,CSNK2A1,PSMD2,TUBB6,NUDC,PPP2R1A,HSP90AA1,TNPO1,PSMD12,SEC13,PSMD13,PSMC3
HSA-174154	APC/C:Cdc20 mediated degradation of Securin	5	65	0.86	0.0112	9606.ENSP00000157812,9606.ENSP00000310129,9606.ENSP00000348442,9606.ENSP00000396937,9606.ENSP00000481029	PSMC4,PSMD2,PSMD12,PSMD13,PSMC3
HSA-8950505	Gene and protein expression by JAK-STAT signaling after Interleukin-12 stimulation	4	37	1.01	0.0116	9606.ENSP00000317334,9606.ENSP00000321259,9606.ENSP00000346032,9606.ENSP00000346694	TCP1,TALDO1,ANXA2,HNRNPA2B1
HSA-5658442	Regulation of RAS by GAPs	5	66	0.86	0.0118	9606.ENSP00000157812,9606.ENSP00000310129,9606.ENSP00000348442,9606.ENSP00000396937,9606.ENSP00000481029	PSMC4,PSMD2,PSMD12,PSMD13,PSMC3
HSA-5693616	Presynaptic phase of homologous DNA pairing and strand exchange	4	38	1	0.0126	9606.ENSP00000254719,9606.ENSP00000347232,9606.ENSP00000363017,9606.ENSP00000442336	RPA1,BLM,RPA2,TOP3A
HSA-3371453	Regulation of HSF1-mediated heat shock response	5	69	0.84	0.0139	9606.ENSP00000216218,9606.ENSP00000254719,9606.ENSP00000324173,9606.ENSP00000363017,9606.ENSP00000373312	ST13,RPA1,HSPA5,RPA2,SEC13
HSA-428359	Insulin-like Growth Factor-2 mRNA Binding Proteins (IGF2BPs/IMPs/VICKZs) bind RNA	2	3	1.8	0.0139	9606.ENSP00000258729,9606.ENSP00000290341	IGF2BP3,IGF2BP1
HSA-174184	Cdc20:Phospho-APC/C mediated degradation of Cyclin A	5	70	0.83	0.0146	9606.ENSP00000157812,9606.ENSP00000310129,9606.ENSP00000348442,9606.ENSP00000396937,9606.ENSP00000481029	PSMC4,PSMD2,PSMD12,PSMD13,PSMC3
HSA-69017	CDK-mediated phosphorylation and removal of Cdc6	5	70	0.83	0.0146	9606.ENSP00000157812,9606.ENSP00000310129,9606.ENSP00000348442,9606.ENSP00000396937,9606.ENSP00000481029	PSMC4,PSMD2,PSMD12,PSMD13,PSMC3
HSA-9706574	RHOBTB GTPase Cycle	3	17	1.22	0.0146	9606.ENSP00000221957,9606.ENSP00000335153,9606.ENSP00000360609	PLIN3,HSP90AA1,HSP90AB1
HSA-174178	APC/C:Cdh1 mediated degradation of Cdc20 and other APC/C:Cdh1 targeted proteins in late mitosis/early G1	5	71	0.83	0.0152	9606.ENSP00000157812,9606.ENSP00000310129,9606.ENSP00000348442,9606.ENSP00000396937,9606.ENSP00000481029	PSMC4,PSMD2,PSMD12,PSMD13,PSMC3
HSA-8957275	Post-translational protein phosphorylation	6	107	0.73	0.0152	9606.ENSP00000054950,9606.ENSP00000295897,9606.ENSP00000299767,9606.ENSP00000327801,9606.ENSP00000385385,9606.ENSP00000466134	RCN1,ALB,HSP90B1,P4HB,PDIA6,PRKCSH
HSA-2173782	Binding and Uptake of Ligands by Scavenger Receptors	4	41	0.97	0.0154	9606.ENSP00000295897,9606.ENSP00000299767,9606.ENSP00000320866,9606.ENSP00000335153	ALB,HSP90B1,CALR,HSP90AA1
HSA-9612973	Autophagy	7	148	0.65	0.0154	9606.ENSP00000217244,9606.ENSP00000221957,9606.ENSP00000318697,9606.ENSP00000335153,9606.ENSP00000351777,9606.ENSP00000360609,9606.ENSP00000446007	CSNK2A1,PLIN3,TUBB6,HSP90AA1,VCP,HSP90AB1,VIM
HSA-5654738	Signaling by FGFR2	5	73	0.81	0.0163	9606.ENSP00000324804,9606.ENSP00000325376,9606.ENSP00000341826,9606.ENSP00000349168,9606.ENSP00000358089	PPP2R1A,HNRNPM,HNRNPA1,HNRNPH1,TIAL1
HSA-9646399	Aggrephagy	4	42	0.96	0.0163	9606.ENSP00000318697,9606.ENSP00000335153,9606.ENSP00000351777,9606.ENSP00000446007	TUBB6,HSP90AA1,VCP,VIM
HSA-110320	Translesion Synthesis by POLH	3	19	1.18	0.0178	9606.ENSP00000254719,9606.ENSP00000351777,9606.ENSP00000363017	RPA1,VCP,RPA2
HSA-174414	Processive synthesis on the C-strand of the telomere	3	19	1.18	0.0178	9606.ENSP00000254719,9606.ENSP00000347232,9606.ENSP00000363017	RPA1,BLM,RPA2
HSA-446203	Asparagine N-linked glycosylation	10	300	0.5	0.0187	9606.ENSP00000237530,9606.ENSP00000300289,9606.ENSP00000306881,9606.ENSP00000318697,9606.ENSP00000320866,9606.ENSP00000340466,9606.ENSP00000350949,9606.ENSP00000351777,9606.ENSP00000373312,9606.ENSP00000466134	RPN2,PDIA3,SEC23A,TUBB6,CALR,GANAB,GMPPA,VCP,SEC13,PRKCSH
HSA-74160	Gene expression (Transcription)	28	1455	0.26	0.0188	9606.ENSP00000157812,9606.ENSP00000216727,9606.ENSP00000217244,9606.ENSP00000221130,9606.ENSP00000254719,9606.ENSP00000278412,9606.ENSP00000296930,9606.ENSP00000307863,9606.ENSP00000310129,9606.ENSP00000311747,9606.ENSP00000324804,9606.ENSP00000326804,9606.ENSP00000335153,9606.ENSP00000339740,9606.ENSP00000347232,9606.ENSP00000348442,9606.ENSP00000354394,9606.ENSP00000355759,9606.ENSP00000363017,…	PSMC4,PABPN1,CSNK2A1,GSR,RPA1,SSRP1,NPM1,U2AF2,PSMD2,RBM14,PPP2R1A,CUL1,HSP90AA1,CAMK2D,BLM,PSMD12,STAT1,PARP1,RPA2,RBBP7,SEC13,HSPD1,DDX39B,SSB,PSMD13,GPI,TOP3A,PSMC3
HSA-157118	Signaling by NOTCH	8	202	0.58	0.0193	9606.ENSP00000157812,9606.ENSP00000310129,9606.ENSP00000326804,9606.ENSP00000348442,9606.ENSP00000354394,9606.ENSP00000361626,9606.ENSP00000396937,9606.ENSP00000481029	PSMC4,PSMD2,CUL1,PSMD12,STAT1,YBX1,PSMD13,PSMC3
HSA-73886	Chromosome Maintenance	6	117	0.69	0.0214	9606.ENSP00000254719,9606.ENSP00000296930,9606.ENSP00000347232,9606.ENSP00000363017,9606.ENSP00000369424,9606.ENSP00000473172	RPA1,NPM1,BLM,RPA2,RBBP7,RUVBL2
HSA-3700989	Transcriptional Regulation by TP53	11	363	0.46	0.0222	9606.ENSP00000217244,9606.ENSP00000221130,9606.ENSP00000254719,9606.ENSP00000278412,9606.ENSP00000296930,9606.ENSP00000324804,9606.ENSP00000347232,9606.ENSP00000363017,9606.ENSP00000369424,9606.ENSP00000405573,9606.ENSP00000442336	CSNK2A1,GSR,RPA1,SSRP1,NPM1,PPP2R1A,BLM,RPA2,RBBP7,GPI,TOP3A
HSA-382551	Transport of small molecules	17	721	0.35	0.0222	9606.ENSP00000157812,9606.ENSP00000269143,9606.ENSP00000276461,9606.ENSP00000295897,9606.ENSP00000305653,9606.ENSP00000310129,9606.ENSP00000326804,9606.ENSP00000327801,9606.ENSP00000339740,9606.ENSP00000348442,9606.ENSP00000348886,9606.ENSP00000351777,9606.ENSP00000356790,9606.ENSP00000367123,9606.ENSP00000396937,9606.ENSP00000445306,9606.ENSP00000481029	PSMC4,AFG3L2,ERLIN2,ALB,LETM1,PSMD2,CUL1,P4HB,CAMK2D,PSMD12,STOML2,VCP,ATP1B1,SLC3A2,PSMD13,ATP1A1,PSMC3
HSA-5651801	PCNA-Dependent Long Patch Base Excision Repair	3	21	1.13	0.0222	9606.ENSP00000216714,9606.ENSP00000254719,9606.ENSP00000363017	APEX1,RPA1,RPA2
HSA-70895	Branched-chain amino acid catabolism	3	21	1.13	0.0222	9606.ENSP00000265594,9606.ENSP00000265838,9606.ENSP00000343657	MCCC1,ACAT1,MCCC2
HSA-9679191	Potential therapeutics for SARS	5	81	0.77	0.0233	9606.ENSP00000335153,9606.ENSP00000356790,9606.ENSP00000360609,9606.ENSP00000369424,9606.ENSP00000445306	HSP90AA1,ATP1B1,HSP90AB1,RBBP7,ATP1A1
HSA-77348	Beta oxidation of octanoyl-CoA to hexanoyl-CoA	2	5	1.58	0.0245	9606.ENSP00000325136,9606.ENSP00000359871	HADHB,ACADM
HSA-8869496	TFAP2A acts as a transcriptional repressor during retinoic acid induced cell differentiation	2	5	1.58	0.0245	9606.ENSP00000296930,9606.ENSP00000373620	NPM1,HSPD1
HSA-9013418	RHOBTB2 GTPase cycle	2	5	1.58	0.0245	9606.ENSP00000335153,9606.ENSP00000360609	HSP90AA1,HSP90AB1
HSA-9683686	Maturation of spike protein	2	5	1.58	0.0245	9606.ENSP00000340466,9606.ENSP00000466134	GANAB,PRKCSH
HSA-5632684	Hedgehog on state	5	83	0.76	0.025	9606.ENSP00000157812,9606.ENSP00000310129,9606.ENSP00000348442,9606.ENSP00000396937,9606.ENSP00000481029	PSMC4,PSMD2,PSMD12,PSMD13,PSMC3
HSA-9010553	Regulation of expression of SLITs and ROBOs	7	167	0.6	0.0258	9606.ENSP00000157812,9606.ENSP00000310129,9606.ENSP00000346067,9606.ENSP00000348442,9606.ENSP00000396937,9606.ENSP00000398131,9606.ENSP00000481029	PSMC4,PSMD2,RPSA,PSMD12,PSMD13,GSPT1,PSMC3
HSA-180786	Extension of Telomeres	4	50	0.88	0.0262	9606.ENSP00000254719,9606.ENSP00000347232,9606.ENSP00000363017,9606.ENSP00000473172	RPA1,BLM,RPA2,RUVBL2
HSA-3371571	HSF1-dependent transactivation	3	23	1.09	0.0262	9606.ENSP00000335153,9606.ENSP00000339740,9606.ENSP00000360609	HSP90AA1,CAMK2D,HSP90AB1
HSA-381426	Regulation of Insulin-like Growth Factor (IGF) transport and uptake by Insulin-like Growth Factor Binding Proteins (IGFBPs)	6	124	0.66	0.0262	9606.ENSP00000054950,9606.ENSP00000295897,9606.ENSP00000299767,9606.ENSP00000327801,9606.ENSP00000385385,9606.ENSP00000466134	RCN1,ALB,HSP90B1,P4HB,PDIA6,PRKCSH
HSA-5683057	MAPK family signaling cascades	10	319	0.47	0.0262	9606.ENSP00000157812,9606.ENSP00000290341,9606.ENSP00000302486,9606.ENSP00000310129,9606.ENSP00000324804,9606.ENSP00000339740,9606.ENSP00000348442,9606.ENSP00000396937,9606.ENSP00000458162,9606.ENSP00000481029	PSMC4,IGF2BP1,MAP2K1,PSMD2,PPP2R1A,CAMK2D,PSMD12,PSMD13,ACTG1,PSMC3
HSA-8949215	Mitochondrial calcium ion transport	3	23	1.09	0.0262	9606.ENSP00000269143,9606.ENSP00000305653,9606.ENSP00000348886	AFG3L2,LETM1,STOML2
HSA-3000484	Scavenging by Class F Receptors	2	6	1.5	0.0306	9606.ENSP00000320866,9606.ENSP00000335153	CALR,HSP90AA1
HSA-5673001	RAF/MAP kinase cascade	9	274	0.49	0.0306	9606.ENSP00000157812,9606.ENSP00000302486,9606.ENSP00000310129,9606.ENSP00000324804,9606.ENSP00000339740,9606.ENSP00000348442,9606.ENSP00000396937,9606.ENSP00000458162,9606.ENSP00000481029	PSMC4,MAP2K1,PSMD2,PPP2R1A,CAMK2D,PSMD12,PSMD13,ACTG1,PSMC3
HSA-77288	Mitochondrial fatty acid beta-oxidation of unsaturated fatty acids	2	6	1.5	0.0306	9606.ENSP00000325136,9606.ENSP00000359871	HADHB,ACADM
HSA-77346	Beta oxidation of decanoyl-CoA to octanoyl-CoA-CoA	2	6	1.5	0.0306	9606.ENSP00000325136,9606.ENSP00000359871	HADHB,ACADM
HSA-2151201	Transcriptional activation of mitochondrial biogenesis	4	54	0.85	0.0322	9606.ENSP00000262030,9606.ENSP00000327589,9606.ENSP00000331897,9606.ENSP00000419665	ATP5B,GLUD2,IDH2,SSBP1
HSA-912446	Meiotic recombination	4	55	0.84	0.034	9606.ENSP00000254719,9606.ENSP00000347232,9606.ENSP00000363017,9606.ENSP00000442336	RPA1,BLM,RPA2,TOP3A
HSA-73857	RNA Polymerase II Transcription	25	1318	0.26	0.0346	9606.ENSP00000157812,9606.ENSP00000216727,9606.ENSP00000217244,9606.ENSP00000221130,9606.ENSP00000254719,9606.ENSP00000278412,9606.ENSP00000296930,9606.ENSP00000307863,9606.ENSP00000310129,9606.ENSP00000311747,9606.ENSP00000324804,9606.ENSP00000326804,9606.ENSP00000339740,9606.ENSP00000347232,9606.ENSP00000348442,9606.ENSP00000354394,9606.ENSP00000355759,9606.ENSP00000363017,9606.ENSP00000369424,…	PSMC4,PABPN1,CSNK2A1,GSR,RPA1,SSRP1,NPM1,U2AF2,PSMD2,RBM14,PPP2R1A,CUL1,CAMK2D,BLM,PSMD12,STAT1,PARP1,RPA2,RBBP7,HSPD1,DDX39B,PSMD13,GPI,TOP3A,PSMC3
HSA-1614635	Sulfur amino acid metabolism	3	27	1.02	0.0365	9606.ENSP00000217426,9606.ENSP00000245206,9606.ENSP00000359539	AHCY,GOT2,GOT1
HSA-162906	HIV Infection	8	232	0.52	0.0372	9606.ENSP00000157812,9606.ENSP00000278412,9606.ENSP00000296930,9606.ENSP00000310129,9606.ENSP00000348442,9606.ENSP00000373312,9606.ENSP00000396937,9606.ENSP00000481029	PSMC4,SSRP1,NPM1,PSMD2,PSMD12,SEC13,PSMD13,PSMC3
HSA-5689603	UCH proteinases	5	94	0.7	0.0372	9606.ENSP00000157812,9606.ENSP00000310129,9606.ENSP00000348442,9606.ENSP00000396937,9606.ENSP00000481029	PSMC4,PSMD2,PSMD12,PSMD13,PSMC3
HSA-9694548	Maturation of spike protein	3	28	1.01	0.0394	9606.ENSP00000237530,9606.ENSP00000340466,9606.ENSP00000466134	RPN2,GANAB,PRKCSH
HSA-5357801	Programmed Cell Death	7	185	0.56	0.0395	9606.ENSP00000157812,9606.ENSP00000310129,9606.ENSP00000335153,9606.ENSP00000348442,9606.ENSP00000396937,9606.ENSP00000446007,9606.ENSP00000481029	PSMC4,PSMD2,HSP90AA1,PSMD12,PSMD13,VIM,PSMC3
HSA-8939236	RUNX1 regulates transcription of genes involved in differentiation of HSCs	5	97	0.69	0.0416	9606.ENSP00000157812,9606.ENSP00000310129,9606.ENSP00000348442,9606.ENSP00000396937,9606.ENSP00000481029	PSMC4,PSMD2,PSMD12,PSMD13,PSMC3
HSA-196854	Metabolism of vitamins and cofactors	7	189	0.55	0.0437	9606.ENSP00000265594,9606.ENSP00000333667,9606.ENSP00000335153,9606.ENSP00000343657,9606.ENSP00000370254,9606.ENSP00000377532,9606.ENSP00000390265	MCCC1,SHMT2,HSP90AA1,MCCC2,AKR1C1,PC,IDH1
HSA-110362	POLB-Dependent Long Patch Base Excision Repair	2	8	1.38	0.044	9606.ENSP00000216714,9606.ENSP00000355759	APEX1,PARP1
HSA-195721	Signaling by WNT	9	296	0.46	0.046	9606.ENSP00000157812,9606.ENSP00000217244,9606.ENSP00000299138,9606.ENSP00000310129,9606.ENSP00000324804,9606.ENSP00000326804,9606.ENSP00000348442,9606.ENSP00000396937,9606.ENSP00000481029	PSMC4,CSNK2A1,VPS35,PSMD2,PPP2R1A,CUL1,PSMD12,PSMD13,PSMC3
HSA-450294	MAP kinase activation	4	63	0.78	0.0499	9606.ENSP00000302486,9606.ENSP00000324804,9606.ENSP00000326804,9606.ENSP00000368884	MAP2K1,PPP2R1A,CUL1,RPS6KA3
HSA-69190	DNA strand elongation	3	31	0.96	0.0499	9606.ENSP00000254719,9606.ENSP00000307288,9606.ENSP00000363017	RPA1,MCM7,RPA2
HSA-8949613	Cristae formation	3	31	0.96	0.0499	9606.ENSP00000262030,9606.ENSP00000381736,9606.ENSP00000387262	ATP5B,ATP5A1,IMMT

## Sheet: Huh-7 KEGG
Enriched KEGG pathways in STRING analysis from analyzed proteins in the Huh-7 OE pulldown
#term ID	term description	observed gene count	background gene count	strength	false discovery rate	matching proteins in your network (IDs)	matching proteins in your network (labels)
hsa01200	Carbon metabolism	23	117	1.27	1.13e-18	9606.ENSP00000216254,9606.ENSP00000229239,9606.ENSP00000234590,9606.ENSP00000245206,9606.ENSP00000265838,9606.ENSP00000270776,9606.ENSP00000320171,9606.ENSP00000321259,9606.ENSP00000327070,9606.ENSP00000327589,9606.ENSP00000331897,9606.ENSP00000333667,9606.ENSP00000335304,9606.ENSP00000345771,9606.ENSP00000358417,9606.ENSP00000359539,9606.ENSP00000362413,9606.ENSP00000377532,9606.ENSP00000378669,…	ACO2,GAPDH,ENO1,GOT2,ACAT1,PGD,PKM,TALDO1,MDH2,GLUD2,IDH2,SHMT2,DLST,PFKM,PHGDH,GOT1,PGK1,PC,ALDOA,IDH1,GPI,ENO2,MDH1
hsa01230	Biosynthesis of amino acids	18	73	1.37	4.02e-16	9606.ENSP00000216254,9606.ENSP00000229239,9606.ENSP00000234590,9606.ENSP00000245206,9606.ENSP00000320171,9606.ENSP00000321259,9606.ENSP00000331897,9606.ENSP00000333667,9606.ENSP00000345771,9606.ENSP00000349446,9606.ENSP00000358417,9606.ENSP00000359539,9606.ENSP00000360268,9606.ENSP00000362413,9606.ENSP00000377532,9606.ENSP00000378669,9606.ENSP00000390265,9606.ENSP00000437402	ACO2,GAPDH,ENO1,GOT2,PKM,TALDO1,IDH2,SHMT2,PFKM,ARG1,PHGDH,GOT1,ALDH18A1,PGK1,PC,ALDOA,IDH1,ENO2
hsa01100	Metabolic pathways	48	1447	0.5	1.51e-10	9606.ENSP00000003100,9606.ENSP00000216254,9606.ENSP00000216951,9606.ENSP00000217426,9606.ENSP00000221130,9606.ENSP00000223127,9606.ENSP00000229239,9606.ENSP00000234590,9606.ENSP00000236959,9606.ENSP00000237530,9606.ENSP00000245206,9606.ENSP00000261733,9606.ENSP00000262030,9606.ENSP00000265594,9606.ENSP00000265838,9606.ENSP00000270776,9606.ENSP00000278840,9606.ENSP00000282903,9606.ENSP00000297785,…	CYP51A1,ACO2,GSS,AHCY,GSR,PLOD3,GAPDH,ENO1,ATIC,RPN2,GOT2,ALDH2,ATP5B,MCCC1,ACAT1,PGD,FADS2,PLOD2,ALDH1A1,CKB,UGDH,PKM,TALDO1,HADHB,MDH2,GLUD2,IDH2,SHMT2,DLST,GANAB,MCCC2,PFKM,ARG1,GMPPA,PHGDH,GOT1,ALDH18A1,DHCR24,PGK1,PC,ALDOA,ATP5A1,PLD3,IDH1,GPI,ENO2,MDH1,ADSL
hsa04141	Protein processing in endoplasmic reticulum	15	165	0.94	5.84e-08	9606.ENSP00000237530,9606.ENSP00000299767,9606.ENSP00000300289,9606.ENSP00000306881,9606.ENSP00000320866,9606.ENSP00000324173,9606.ENSP00000326804,9606.ENSP00000327801,9606.ENSP00000335153,9606.ENSP00000340466,9606.ENSP00000351777,9606.ENSP00000360609,9606.ENSP00000373312,9606.ENSP00000385385,9606.ENSP00000466134	RPN2,HSP90B1,PDIA3,SEC23A,CALR,HSPA5,CUL1,P4HB,HSP90AA1,GANAB,VCP,HSP90AB1,SEC13,PDIA6,PRKCSH
hsa00010	Glycolysis / Gluconeogenesis	9	65	1.12	5.02e-06	9606.ENSP00000229239,9606.ENSP00000234590,9606.ENSP00000261733,9606.ENSP00000320171,9606.ENSP00000345771,9606.ENSP00000362413,9606.ENSP00000378669,9606.ENSP00000405573,9606.ENSP00000437402	GAPDH,ENO1,ALDH2,PKM,PFKM,PGK1,ALDOA,GPI,ENO2
hsa00020	Citrate cycle (TCA cycle)	7	29	1.36	5.02e-06	9606.ENSP00000216254,9606.ENSP00000327070,9606.ENSP00000331897,9606.ENSP00000335304,9606.ENSP00000377532,9606.ENSP00000390265,9606.ENSP00000438144	ACO2,MDH2,IDH2,DLST,PC,IDH1,MDH1
hsa00270	Cysteine and methionine metabolism	7	49	1.13	8.69e-05	9606.ENSP00000216951,9606.ENSP00000217426,9606.ENSP00000245206,9606.ENSP00000327070,9606.ENSP00000358417,9606.ENSP00000359539,9606.ENSP00000438144	GSS,AHCY,GOT2,MDH2,PHGDH,GOT1,MDH1
hsa03040	Spliceosome	10	132	0.86	0.0001	9606.ENSP00000283179,9606.ENSP00000305556,9606.ENSP00000307863,9606.ENSP00000325376,9606.ENSP00000341826,9606.ENSP00000359645,9606.ENSP00000365439,9606.ENSP00000379475,9606.ENSP00000446099,9606.ENSP00000451291	HNRNPU,PCBP1,U2AF2,HNRNPM,HNRNPA1,RBMX,HNRNPK,DDX39B,RBMXL1,HNRNPC
hsa01210	2-Oxocarboxylic acid metabolism	5	18	1.42	0.00013	9606.ENSP00000216254,9606.ENSP00000245206,9606.ENSP00000331897,9606.ENSP00000359539,9606.ENSP00000390265	ACO2,GOT2,IDH2,GOT1,IDH1
hsa00620	Pyruvate metabolism	6	38	1.18	0.0002	9606.ENSP00000261733,9606.ENSP00000265838,9606.ENSP00000320171,9606.ENSP00000327070,9606.ENSP00000377532,9606.ENSP00000438144	ALDH2,ACAT1,PKM,MDH2,PC,MDH1
hsa00330	Arginine and proline metabolism	6	48	1.07	0.00062	9606.ENSP00000245206,9606.ENSP00000261733,9606.ENSP00000299198,9606.ENSP00000349446,9606.ENSP00000359539,9606.ENSP00000360268	GOT2,ALDH2,CKB,ARG1,GOT1,ALDH18A1
hsa00030	Pentose phosphate pathway	5	29	1.21	0.00071	9606.ENSP00000270776,9606.ENSP00000321259,9606.ENSP00000345771,9606.ENSP00000378669,9606.ENSP00000405573	PGD,TALDO1,PFKM,ALDOA,GPI
hsa00630	Glyoxylate and dicarboxylate metabolism	5	30	1.2	0.00071	9606.ENSP00000216254,9606.ENSP00000265838,9606.ENSP00000327070,9606.ENSP00000333667,9606.ENSP00000438144	ACO2,ACAT1,MDH2,SHMT2,MDH1
hsa04066	HIF-1 signaling pathway	8	106	0.86	0.00071	9606.ENSP00000229239,9606.ENSP00000234590,9606.ENSP00000302486,9606.ENSP00000339740,9606.ENSP00000345771,9606.ENSP00000362413,9606.ENSP00000378669,9606.ENSP00000437402	GAPDH,ENO1,MAP2K1,CAMK2D,PFKM,PGK1,ALDOA,ENO2
hsa05014	Amyotrophic lateral sclerosis	14	352	0.58	0.00071	9606.ENSP00000157812,9606.ENSP00000240185,9606.ENSP00000262030,9606.ENSP00000310129,9606.ENSP00000318697,9606.ENSP00000324173,9606.ENSP00000341826,9606.ENSP00000346694,9606.ENSP00000348442,9606.ENSP00000351777,9606.ENSP00000373312,9606.ENSP00000381736,9606.ENSP00000458162,9606.ENSP00000481029	PSMC4,TARDBP,ATP5B,PSMD2,TUBB6,HSPA5,HNRNPA1,HNRNPA2B1,PSMD12,VCP,SEC13,ATP5A1,ACTG1,PSMC3
hsa03440	Homologous recombination	5	39	1.09	0.0019	9606.ENSP00000254719,9606.ENSP00000347232,9606.ENSP00000363017,9606.ENSP00000419665,9606.ENSP00000442336	RPA1,BLM,RPA2,SSBP1,TOP3A
hsa00220	Arginine biosynthesis	4	21	1.26	0.0024	9606.ENSP00000245206,9606.ENSP00000327589,9606.ENSP00000349446,9606.ENSP00000359539	GOT2,GLUD2,ARG1,GOT1
hsa00970	Aminoacyl-tRNA biosynthesis	5	44	1.03	0.0029	9606.ENSP00000256854,9606.ENSP00000261772,9606.ENSP00000264161,9606.ENSP00000369897,9606.ENSP00000387710	NARS,AARS,DARS,CARS,TARS
hsa04964	Proximal tubule bicarbonate reclamation	4	23	1.22	0.0029	9606.ENSP00000327589,9606.ENSP00000356790,9606.ENSP00000438144,9606.ENSP00000445306	GLUD2,ATP1B1,MDH1,ATP1A1
hsa00280	Valine, leucine and isoleucine degradation	5	46	1.01	0.0031	9606.ENSP00000261733,9606.ENSP00000265594,9606.ENSP00000265838,9606.ENSP00000325136,9606.ENSP00000343657	ALDH2,MCCC1,ACAT1,HADHB,MCCC2
hsa04918	Thyroid hormone synthesis	6	74	0.89	0.0031	9606.ENSP00000221130,9606.ENSP00000295897,9606.ENSP00000299767,9606.ENSP00000324173,9606.ENSP00000356790,9606.ENSP00000445306	GSR,ALB,HSP90B1,HSPA5,ATP1B1,ATP1A1
hsa00480	Glutathione metabolism	5	53	0.95	0.0052	9606.ENSP00000216951,9606.ENSP00000221130,9606.ENSP00000270776,9606.ENSP00000331897,9606.ENSP00000390265	GSS,GSR,PGD,IDH2,IDH1
hsa00310	Lysine degradation	5	60	0.9	0.0085	9606.ENSP00000223127,9606.ENSP00000261733,9606.ENSP00000265838,9606.ENSP00000282903,9606.ENSP00000335304	PLOD3,ALDH2,ACAT1,PLOD2,DLST
hsa04612	Antigen processing and presentation	5	63	0.88	0.01	9606.ENSP00000300289,9606.ENSP00000320866,9606.ENSP00000324173,9606.ENSP00000335153,9606.ENSP00000360609	PDIA3,CALR,HSPA5,HSP90AA1,HSP90AB1
hsa00250	Alanine, aspartate and glutamate metabolism	4	36	1.02	0.0105	9606.ENSP00000245206,9606.ENSP00000327589,9606.ENSP00000359539,9606.ENSP00000485525	GOT2,GLUD2,GOT1,ADSL
hsa03030	DNA replication	4	36	1.02	0.0105	9606.ENSP00000254719,9606.ENSP00000307288,9606.ENSP00000363017,9606.ENSP00000419665	RPA1,MCM7,RPA2,SSBP1
hsa05230	Central carbon metabolism in cancer	5	69	0.84	0.0131	9606.ENSP00000302486,9606.ENSP00000320171,9606.ENSP00000331897,9606.ENSP00000345771,9606.ENSP00000390265	MAP2K1,PKM,IDH2,PFKM,IDH1
hsa04216	Ferroptosis	4	41	0.97	0.0146	9606.ENSP00000216951,9606.ENSP00000305556,9606.ENSP00000352438,9606.ENSP00000367123	GSS,PCBP1,PCBP2,SLC3A2
hsa04971	Gastric acid secretion	5	73	0.81	0.0146	9606.ENSP00000339740,9606.ENSP00000356042,9606.ENSP00000356790,9606.ENSP00000445306,9606.ENSP00000458162	CAMK2D,EZR,ATP1B1,ATP1A1,ACTG1
hsa05012	Parkinson disease	9	240	0.55	0.0146	9606.ENSP00000157812,9606.ENSP00000262030,9606.ENSP00000310129,9606.ENSP00000318697,9606.ENSP00000324173,9606.ENSP00000339740,9606.ENSP00000348442,9606.ENSP00000381736,9606.ENSP00000481029	PSMC4,ATP5B,PSMD2,TUBB6,HSPA5,CAMK2D,PSMD12,ATP5A1,PSMC3
hsa05169	Epstein-Barr virus infection	8	193	0.6	0.0146	9606.ENSP00000157812,9606.ENSP00000300289,9606.ENSP00000310129,9606.ENSP00000320866,9606.ENSP00000348442,9606.ENSP00000354394,9606.ENSP00000446007,9606.ENSP00000481029	PSMC4,PDIA3,PSMD2,CALR,PSMD12,STAT1,VIM,PSMC3
hsa03050	Proteasome	4	43	0.95	0.0151	9606.ENSP00000157812,9606.ENSP00000310129,9606.ENSP00000348442,9606.ENSP00000481029	PSMC4,PSMD2,PSMD12,PSMC3
hsa05010	Alzheimer disease	11	355	0.47	0.0168	9606.ENSP00000157812,9606.ENSP00000217244,9606.ENSP00000229239,9606.ENSP00000262030,9606.ENSP00000302486,9606.ENSP00000310129,9606.ENSP00000318697,9606.ENSP00000337838,9606.ENSP00000348442,9606.ENSP00000381736,9606.ENSP00000481029	PSMC4,CSNK2A1,GAPDH,ATP5B,MAP2K1,PSMD2,TUBB6,RTN4,PSMD12,ATP5A1,PSMC3
hsa05206	MicroRNAs in cancer	7	160	0.62	0.0185	9606.ENSP00000290341,9606.ENSP00000302486,9606.ENSP00000356042,9606.ENSP00000365439,9606.ENSP00000373272,9606.ENSP00000384136,9606.ENSP00000446007	IGF2BP1,MAP2K1,EZR,HNRNPK,TRIM71,RDX,VIM
hsa04919	Thyroid hormone signaling pathway	6	119	0.68	0.0192	9606.ENSP00000302486,9606.ENSP00000345771,9606.ENSP00000354394,9606.ENSP00000356790,9606.ENSP00000445306,9606.ENSP00000458162	MAP2K1,PFKM,STAT1,ATP1B1,ATP1A1,ACTG1
hsa05132	Salmonella infection	8	209	0.56	0.0192	9606.ENSP00000229239,9606.ENSP00000262982,9606.ENSP00000299767,9606.ENSP00000302486,9606.ENSP00000335153,9606.ENSP00000346032,9606.ENSP00000360609,9606.ENSP00000458162	GAPDH,CSE1L,HSP90B1,MAP2K1,HSP90AA1,ANXA2,HSP90AB1,ACTG1
hsa03430	Mismatch repair	3	23	1.09	0.0217	9606.ENSP00000254719,9606.ENSP00000363017,9606.ENSP00000419665	RPA1,RPA2,SSBP1
hsa05020	Prion disease	9	265	0.51	0.0217	9606.ENSP00000157812,9606.ENSP00000217244,9606.ENSP00000262030,9606.ENSP00000310129,9606.ENSP00000318697,9606.ENSP00000324173,9606.ENSP00000348442,9606.ENSP00000381736,9606.ENSP00000481029	PSMC4,CSNK2A1,ATP5B,PSMD2,TUBB6,HSPA5,PSMD12,ATP5A1,PSMC3
hsa03460	Fanconi anemia pathway	4	51	0.87	0.0222	9606.ENSP00000254719,9606.ENSP00000347232,9606.ENSP00000363017,9606.ENSP00000442336	RPA1,BLM,RPA2,TOP3A
hsa00400	Phenylalanine, tyrosine and tryptophan biosynthesis	2	6	1.5	0.0244	9606.ENSP00000245206,9606.ENSP00000359539	GOT2,GOT1
hsa03015	mRNA surveillance pathway	5	93	0.71	0.0297	9606.ENSP00000216727,9606.ENSP00000240185,9606.ENSP00000324804,9606.ENSP00000379475,9606.ENSP00000398131	PABPN1,TARDBP,PPP2R1A,DDX39B,GSPT1
hsa05017	Spinocerebellar ataxia	6	135	0.63	0.0297	9606.ENSP00000157812,9606.ENSP00000252934,9606.ENSP00000269143,9606.ENSP00000310129,9606.ENSP00000348442,9606.ENSP00000481029	PSMC4,ATXN10,AFG3L2,PSMD2,PSMD12,PSMC3
hsa00051	Fructose and mannose metabolism	3	32	0.95	0.0446	9606.ENSP00000345771,9606.ENSP00000350949,9606.ENSP00000378669	PFKM,GMPPA,ALDOA
hsa04217	Necroptosis	6	149	0.58	0.0446	9606.ENSP00000327589,9606.ENSP00000335153,9606.ENSP00000339740,9606.ENSP00000354394,9606.ENSP00000355759,9606.ENSP00000360609	GLUD2,HSP90AA1,CAMK2D,STAT1,PARP1,HSP90AB1

## Sheet: SNU-449
Enriched Reactome pathways in STRING analysis from analyzed proteins in the SNU-449 OE pulldown
#term ID	term description	observed gene count	background gene count	strength	false discovery rate	matching proteins in your network (IDs)	matching proteins in your network (labels)
HSA-72163	mRNA Splicing - Major Pathway	12	178	1.36	5.03e-10	9606.ENSP00000221419,9606.ENSP00000283179,9606.ENSP00000305556,9606.ENSP00000307863,9606.ENSP00000313199,9606.ENSP00000325376,9606.ENSP00000352438,9606.ENSP00000359645,9606.ENSP00000361626,9606.ENSP00000365439,9606.ENSP00000376309,9606.ENSP00000451291	HNRNPL,HNRNPU,PCBP1,U2AF2,HNRNPD,HNRNPM,PCBP2,RBMX,YBX1,HNRNPK,HNRNPA3,HNRNPC
HSA-8953854	Metabolism of RNA	15	659	0.89	2.94e-07	9606.ENSP00000221419,9606.ENSP00000283179,9606.ENSP00000290341,9606.ENSP00000305556,9606.ENSP00000307863,9606.ENSP00000313199,9606.ENSP00000318195,9606.ENSP00000325376,9606.ENSP00000352438,9606.ENSP00000359645,9606.ENSP00000361626,9606.ENSP00000365439,9606.ENSP00000376309,9606.ENSP00000407323,9606.ENSP00000451291	HNRNPL,HNRNPU,IGF2BP1,PCBP1,U2AF2,HNRNPD,NCL,HNRNPM,PCBP2,RBMX,YBX1,HNRNPK,HNRNPA3,EBNA1BP2,HNRNPC
Enriched KEGG pathways in STRING analysis from analyzed proteins in the SNU-449 OE pulldown
#term ID	term description	observed gene count	background gene count	strength	false discovery rate	matching proteins in your network (IDs)	matching proteins in your network (labels)
hsa03040	Spliceosome	9	132	1.37	8.9e-08	9606.ENSP00000283179,9606.ENSP00000305556,9606.ENSP00000307863,9606.ENSP00000325376,9606.ENSP00000359645,9606.ENSP00000365439,9606.ENSP00000376309,9606.ENSP00000446099,9606.ENSP00000451291	HNRNPU,PCBP1,U2AF2,HNRNPM,RBMX,HNRNPK,HNRNPA3,RBMXL1,HNRNPC
